# Supplementary material
Source: PubMed Central journal article supplement (PMC2836780)
Supplement: NIHMS176759-supplement-01.pdf [file NIHMS176759-supplement-01.pdf]

## Mouse mylk1 gene

Mouse chromosome 16 genomic sequence obtained from the February 2006 compilation of the mouse genome sequence on the UCSC genome browser (<http://genome.ucsc.edu>) is shown. Exons are shown in upper case blue text. The first exons of each of the known *mylk1* gene products are indicated and the initiation codons of each product are highlighted in red.

```
ttaagaaact gttccaggat ggggcctggt taccctgagg ggttggctgg 34664217
catatcttgg gctcagcctg cagttattht tttcctcact gtcctctctg 34664267
ccttccacag cctctcccat ctctgctcct tttgctctcc tgacgatcta 34664317
gatgcttctt ttcggttcaa actcgtgcat tcccgattta tgagcaattg 34664367
catgttcagc actgtgggtca tctcctgtgg taagaaaatc taattagtga 34664417
atgtaaagta acttgtccaa aagttttagt ctagaagcaa ataaagtcaa 34664467
cttcagaata gctgtgctat tctgcctacg taatthttht ttggtcatta 34664517
atagaaagga aattgcatgt aatataattht tgaaagttaa gtctthtcagg 34664567
aaactthtata aaatatgttht cagtatatgt tctctctctc tctctctctc 34664617
tctctctctc tctgtgtgtg tgtgtgtgtg ttgattggtc tgggtgctgtt 34664667
aacagctctt atcaatgaga aagaaaatta atthtccaat gagtgatgct 34664717
ctthtggctg tagtgagagt tcttctaaga gatgcaaaag taaaattcaa 34664767
aaaccaggaa cacctgttht ttgtggcgcg gacctgggaa ggactggaca 34664817
gtctggacca ggacggacgc tggagtccca ggcgggagtg ggcgtggcg 34664867
ctgggtggca ggtccattcc tggagcttca tgcaaatgac atgcaataa 34664917
gcgcgtggaa gttgctgcgc cttagagcttht cccagtccaG AGAGCCGCGC 34664967
TGCCGCCCCG CCGCTCGGTC CGCTCCCGCC TGCTCGCTGC TCGCCGCCGC 34665017
GTAGGGTTCG CACATCGGCG CTCGCAGCCG CTCCAGCTCC CGAGGCGCCC 34665067
GTCCAACCGG CCGCGGAGCC CGACGCCTGC GGCTGCGCGT CGCCGCGCTG 34665117
gtgagtgagc ctgcccgcgc thtthtctctg ccacggtcac cctgttcccg 34665167
ttgagaatgg ctcttaggag cggcaagagt tgggtgtgag ggggacacta 34665217
gctthttaaag gatgactcct cccccatccc agcctthtgca gagggcttga 34665267
ttaccgccag gtctctcacc accagtgtga tgctgggatg tggatggttc 34665317
gctctctcgc actccacaga gaccaccgcg cttcgacttg cttcgggtta 34665367
gccggggcg tttcctgagg gactthtgta gagatgcctg cthtagagaa 34665417
gthtggaaata gactgatcac taggagtagc ttagatagta tgctcttctg 34665467
gatcttaggg atctgaaact cthcaaaacc caaagaactg agthtctaaag 34665517
actggcacgg cagatgggaa gatactgttg aggagaatgt tcgggcttht 34665567
aaaaatgaaa ttgaggtggg aatathtagc tgtatgataa aagaaaggtc 34665617
ccgctccact gggatctgaa aggaatacaa ttagctattg tgctthtcagg 34665667
gagctgtgtt ggggtgaggg tgcacccagg tagtgacat ggggctggct 34665717
ggcaaaccat ctctthtctc aagtgcaaag aatgaggtat atgaathtcc 34665767
ccttctcccg cagcccctcc tctacctca gctctccaga gcctgcttga 34665817
gagtctcttht cctctcccag aagatgtggg gtggctcttg gcctggaaga 34665867
atctthtgctt gthgttaaaa tgcacaactc tactctaaag cgttaggtat 34665917
ccacacatca gtctctaggg ggaaatgtga cgttgctgta accaatgttc 34665967
ctaaaacctt ccctthtctt ccccttgcc acccttgtct gtcagattcg 34666017
tgacctthgc tactgthtct cactgtcttht cctgtctctg ccttctctgt 34666067
tctggcccag aaagagctgt ggaggggtgat gccttgctt ctgtgcccta 34666117
gattagtcaa gtgatcctgc ctgtgtccag agtaagattg tcccagggtc 34666167
```

E1

|             |             |            |            |            |          |
|-------------|-------------|------------|------------|------------|----------|
| cccaccttca  | gcgtccaaga  | acctaagcta | aggctagaag | gagctttctt | 34666217 |
| gaacacttgg  | ttctgagtgg  | gagaatgggt | gtactctggg | gacatgcatg | 34666267 |
| ggagcttttg  | tatcaagatg  | aagggatcat | acagcttgca | gaaacaccct | 34666317 |
| actgtgctac  | aggtccgcac  | tagacactcg | tctcttgtgt | gtgtgtgtgt | 34666367 |
| gtgtgtgtgt  | gtgtgtgtgt  | gtgtgtgtga | aagagaggag | gtactagggt | 34666417 |
| gacactatga  | ttggccagtg  | gaggaagagg | gtagctgggg | tagaggtaag | 34666467 |
| ggtacacctg  | ggcagtgtc   | atgacagagc | tcagatcctc | agagtaggtt | 34666517 |
| ctgtgtgtga  | gattccagac  | cccttccacc | agaagctgtt | tcccaggcgc | 34666567 |
| tggatctcag  | agaacatgta  | tgaaatcagg | actttgggat | atttgctgac | 34666617 |
| ctaactcgta  | agaccaggta  | ggcctacctg | gaacatagta | gacagacagc | 34666667 |
| tgtagtcact  | acagagcagg  | gaggaatctt | caaagaaggc | ttgtctggcc | 34666717 |
| aggtgtaagg  | agtcacgggt  | cacaggtcac | aggtcacagg | tcacaggcct | 34666767 |
| ttgcaaggta  | cttggtagaa  | gaagagtgtt | ggtcctgacg | cgtaagtctc | 34666817 |
| ttcagtgc    | tctctgggaa  | caccaaggac | tccctctcaa | gaaacacccc | 34666867 |
| ttgatcccc   | cccctttgat  | gtataagatg | aatggctaca | catctttatt | 34666917 |
| tagtcccata  | tttttccctg  | tgaaggc    | ctagttgggt | tgttgtttct | 34666967 |
| ttgttaaaga  | gactcacaca  | gtagggattt | agaatgaag  | cattgcagtc | 34667017 |
| aacacaggag  | tctcgtttag  | tctctttctg | agaaaaatgt | tttgcagtc  | 34667067 |
| acacacatta  | ttcgttcata  | aaagcctcct | gttggtcggg | cagtggtgac | 34667117 |
| gcatgctttt  | aatcctagca  | ctctggaggc | agaggcagga | ggctccctgt | 34667167 |
| gagttcagag  | gccagcctgg  | tcaacatagc | aagtcttagg | acagccagaa | 34667217 |
| ctacatagag  | agaccttgc   | aaaacaaaac | aaaccaccta | gacaaacaaa | 34667267 |
| taaacaacac  | aaaaccctc   | accttctgtc | ctttctgcaa | agctagtgg  | 34667317 |
| atttagagaa  | caacactgta  | taaagtaatg | ttttccaaca | atagagacat | 34667367 |
| tcaatataga  | gcaattaa    | atgttttgag | agtataatta | catttccct  | 34667417 |
| ttccctttgc  | tctctctaaa  | tattccccac | ttttctctcc | ttcaaatcca | 34667467 |
| tggcctcttt  | tttcatgaat  | tattagtaga | tacatatgat | atgtgcatat | 34667517 |
| atacacatat  | gcacacacac  | aatctgttga | accttccct  | gccctccacc | 34667567 |
| tctggccaac  | aaggggtatg  | cacagaagcc | aagagggtgg | atccatttgc | 34667617 |
| atggaagact  | tacacacata  | gatgcttggg | tcccagtagg | atcaactggt | 34667667 |
| tgtcatgggg  | gctcagaacc  | aaagaattat | caagcagtc  | tccagctga  | 34667717 |
| agacagagca  | atgtcactgc  | agtgagcccc | ggtgtcacgt | gacttctttc | 34667767 |
| ctttcccttt  | gctctctcag  | cctcctgtcc | caaggagtcc | tgaggtgcca | 34667817 |
| ggcagcaagc  | tgctgtccg   | tcacatatct | cccacatctc | ccattttgca | 34667867 |
| ggtgcctttc  | attattccga  | tttgaatttt | agctgccaac | ctcttctcc  | 34667917 |
| aggtaaagct  | cacaggggtga | gtaagcgtg  | ctcttacatg | cacgtgctca | 34667967 |
| gggctgttgg  | acctggtttg  | tcaccacagg | ccaggaggtc | atcctttctg | 34668017 |
| ccttgggtacc | tgcacctcag  | atgccaggct | gtcgagttgt | ggcatgacag | 34668067 |
| gcggggctgg  | ggcacaggcc  | gggtcagcag | gaattgctgc | ttgcagctca | 34668117 |
| gggactgagg  | gaggctgact  | tttcagctgc | tccctgggat | cttcttttca | 34668167 |
| gtgtcctcct  | gctcactgtc  | cctgggtgtc | tgagggcgaa | tgctcacaat | 34668217 |
| gggaaccca   | ctagggagct  | ctgggaattt | ctgtgtagat | ccagcttctc | 34668267 |
| gaatttcca   | gcgctgtccc  | ctccccact  | cctggtaggt | ctgtgccct  | 34668317 |
| ccctcctatt  | ctgccaccc   | tgggctctgc | tgctctgctc | ctccctctg  | 34668367 |
| ggtctcagtg  | cacagccctc  | tggagaccca | aagcccccg  | gacaaaggag | 34668417 |
| aggggatgag  | gagaggattt  | cctttctttc | agatctgcag | cttgattttc | 34668467 |
| cctctagctc  | tgagccctta  | gatctaattg | taatttgta  | agccagggcc | 34668517 |
| ttataaatta  | cttctcatat  | tcgtcagaga | acactggtaa | tttgggcaca | 34668567 |

|             |              |             |            |             |          |
|-------------|--------------|-------------|------------|-------------|----------|
| tattgagggt  | taaaaaaaaatg | cagctgtggt  | gtaccttttg | tttccagaaa  | 34668617 |
| ttaatgattt  | tttttttttt   | tttgttaaag  | tacaggtagt | tcttcagaaa  | 34668667 |
| actggcagga  | ggcagggtgaa  | ttttgaactt  | taaccataca | ttcagatctg  | 34668717 |
| tcctgtcctg  | tttactggct   | gggtgttctc  | ggggaacagt | agtgtcttta  | 34668767 |
| tttgaccatg  | aaagggcagt   | ttcaaaaatt  | aaattgccaa | ggctgtagta  | 34668817 |
| atlcagtcac  | tgaagtgctt   | gcctcccaag  | tgtgaaaact | tgcgtttcat  | 34668867 |
| ttccagaagc  | catgtttaaa   | aaaaaaaaaa  | aaaaacagcc | ttggtggcac  | 34668917 |
| aggcccataa  | tctcagccct   | gggaaggcag  | aggctggcga | tccctagggg  | 34668967 |
| tcatggccag  | cctgtctagt   | aaccagccac  | ctactagggt | atcttcaggt  | 34669017 |
| ctgtgagatt  | ttctatctca   | aaataacaag  | gcagataggt | ggctcctgag  | 34669067 |
| aagagacacc  | tagagttgac   | ttttagcttc  | cacatatatg | catgcatgcc  | 34669117 |
| agttcgtggt  | catccataca   | tacatgctta  | actaccggat | ggaaaatagg  | 34669167 |
| gaaatcatta  | ttataaccta   | ctgagtcaca  | gcattcatca | tgcccatgga  | 34669217 |
| ataactataa  | atgagccagc   | aaacataatt  | agctacctac | tctccactac  | 34669267 |
| gttgtgtgga  | tgagcataaa   | gccaagggtc  | ttagcccttc | tagacttggg  | 34669317 |
| tctgtatgag  | gacacagttg   | ccatgaatga  | agtaaaaaga | aaacaggaat  | 34669367 |
| gacgcagaac  | ttaaaagtgt   | gcaaagcagc  | aagaagctca | gggcctgctg  | 34669417 |
| tgggtgggaa  | ggcctcagac   | acaggaagag  | agcaggggga | tgtgtgctgg  | 34669467 |
| gagagagggc  | caggaactct   | tggctccatg  | tctgcaaggg | ctcagccctt  | 34669517 |
| tctcagctgg  | cacctgggtg   | gacacctttg  | accccgtgct | gttccccag   | 34669567 |
| ccatgcctgt  | ctgcttctcc   | tgagatttat  | ttcctgaatg | attttcattt  | 34669617 |
| ctgggcttgt  | tttctttctg   | cccagagtat  | tccaggcgtg | aattcaattt  | 34669667 |
| tatgctgaat  | cgaaaataat   | gagaggggaat | tctatggctt | cagcaaaggc  | 34669717 |
| tccgtcccat  | ggaagtctgg   | tggtttctgg  | gggctctggt | ctctcttctc  | 34669767 |
| gtgcttcggt  | tgctcgtcta   | aactgctgag  | cactggacta | atggagacat  | 34669817 |
| gccacatga   | gtttgcagga   | gcaaggaggc  | ataagaagca | ccgtgggtgaa | 34669867 |
| ctgaatcacc  | cacagttttc   | atctcccatc  | tgtgctgata | gaagactgtg  | 34669917 |
| atgggctggg  | atgaccaatg   | tcttctccta  | aaacagagga | atgggcacag  | 34669967 |
| actggcccta  | ttgtctcttc   | tagttggagc  | cctagagtcc | ttaaaagtca  | 34670017 |
| ccctccctaa  | tttgctttac   | tttaaattgt  | tatttagctt | tgggtggtatg | 34670067 |
| gggtgtttgt  | ctgcatgtgt   | ctatatatat  | agaatgcatg | ctgtgccac   | 34670117 |
| ggaggccaga  | agagggcatt   | ggattcccag  | aactgcagtt | agagattggt  | 34670167 |
| gttagctgct  | aagtgtgtgc   | tgggattgaa  | gtctgatcct | ctgaaagagc  | 34670217 |
| agccagtatt  | cttaatgccc   | gaggcatctt  | tccagcctct | gctttgtgag  | 34670267 |
| tcttaaagca  | cagtctgacc   | atgccacccc  | atcttcagaa | acctctgcta  | 34670317 |
| gttctgggtcc | cttgaataaa   | tctcacctag  | aaattcagaa | acaccccacc  | 34670367 |
| cccaccccca  | ccccacccc    | caccagccc   | cgtgtctctc | caagtctgct  | 34670417 |
| gctttgtccc  | acaacagcct   | tcacctagtg  | agtacttccc | tgtctctctg  | 34670467 |
| gtgcattctc  | ttctggaaca   | ttctccatgt  | gcctctttgc | cggtttaact  | 34670517 |
| cttctgtctt  | tacctggttg   | ttcagcaatg  | agttgagttt | ctatctcttg  | 34670567 |
| acccaatgc   | aggctgcctt   | tgacctcggc  | ttcaaaatct | ggagcaatct  | 34670617 |
| gttcttgag   | aatttaaggt   | gacaagtcac  | gcaggattat | ggaatgcttt  | 34670667 |
| aacatthttat | ttgathtttt   | tttatgggtga | aaatttataa | caactttgga  | 34670717 |
| aaatctgctg  | gggaagggtg   | tagtgggtgtt | tattccttac | agcaggggtc  | 34670767 |
| cagagctgta  | aaataatggt   | tcccttctag  | tccagctggc | tcagtgggtc  | 34670817 |
| cagggactct  | ctgatgtttg   | ccttgthttg  | atthctgctt | ttgthttttt  | 34670867 |
| ttthttctgca | caaagctccc   | tggatgattc  | tgagagcagc | caaagatgag  | 34670917 |
| gctcaatcct  | gagtggtatt   | ttthttcatg  | atgtcgtttg | ttctttgttt  | 34670967 |

|             |             |             |             |             |          |
|-------------|-------------|-------------|-------------|-------------|----------|
| tgtgaattag  | caataaatct  | tcagaattga  | caaaccaact  | ctggttaggt  | 34671017 |
| aaaaagaaag  | aagggagggga | gggaagggag  | gaggggaagga | aggagggagg  | 34671067 |
| gagggaaatgg | ggtaggggata | gaagctgtgc  | cttgcgtagt  | tagtttctca  | 34671117 |
| ggaaacaagc  | atctcctctg  | atgcacacat  | ttgacagtgg  | ccaagcattt  | 34671167 |
| tgttcataga  | gctgcatact  | cgtttcttca  | tcattgggtac | aactaaaatg  | 34671217 |
| aaagatcctt  | ccgaactatg  | ttagtttcac  | atgattttgg  | gatgtaacgc  | 34671267 |
| tgctggtttt  | tacaatcagt  | gttcatgagt  | tctgaatggg  | ggtcaatcct  | 34671317 |
| tgtttcaaga  | cagacactgg  | gttaagattt  | agatttgttg  | ctgtttttgt  | 34671367 |
| ttgtttttag  | ggcatgttgt  | ctctgactgt  | gtggtathtt  | atthttgggtc | 34671417 |
| ttgcatcta   | tgtctcaagt  | gagataaaac  | tattgttttt  | gctttctttg  | 34671467 |
| cccagcagtg  | tttaagcctc  | agatttttga  | cacctttcct  | tctttgaaat  | 34671517 |
| gaatagaacc  | actctctgag  | acactgaaag  | atgctgtaat  | ttccctacat  | 34671567 |
| ttctttttct  | tctctctcac  | ctgagcctct  | ctctttctct  | ttctggatgc  | 34671617 |
| agaagtgcta  | cctcctcctc  | tctgcccag   | ctaattggctg | aatctgctct  | 34671667 |
| ttattgacca  | ataagaaaaa  | aaaaataatg  | agtcaaaaaa  | tgcttcatag  | 34671717 |
| taatgataac  | aaaatccaga  | ctgcaccag   | atctcccggg  | actaaaatca  | 34671767 |
| gcatctgaat  | acacagggag  | cagactatcc  | cctaacaagg  | tccaggtttt  | 34671817 |
| acatttaagt  | ttgatgtggg  | ttggtttttg  | agtcagctgt  | tatacttgtc  | 34671867 |
| tcaagacata  | gagattcttt  | tctcaacagg  | aatgtctagt  | tgtctactgt  | 34671917 |
| agtgaaaaac  | tagccctccc  | tgttgtccct  | ttgttgaaaa  | ttaatggagc  | 34671967 |
| atgtgtgtgg  | gggatgtcag  | ctgagtatht  | cccactgctt  | tatgtgttta  | 34672017 |
| tcttagcagt  | gatacagtat  | cgaggccttt  | gtatctttat  | tagatccttt  | 34672067 |
| aaaatcgaga  | agttgaatca  | acttactccc  | ttctcaaagt  | tgttcagcca  | 34672117 |
| ttctagagct  | tttgctgttc  | ggataaattt  | taggacttcc  | atgtggatgt  | 34672167 |
| ctacattaaa  | atcctgctgt  | aagttttggt  | gttgctgttt  | gtctgactga  | 34672217 |
| tgggttgatt  | ttgtttgttt  | gtttgtttgt  | ttgtttatht  | gctttatctt  | 34672267 |
| tctgagacag  | gatctgttca  | tactcttgta  | actacaccta  | gaggcaggcc  | 34672317 |
| tctgggcatt  | gtctagatta  | aggttagcct  | ctaagaacga  | gagtctctct  | 34672367 |
| ctgtctctac  | ctctctctct  | ctctctctct  | ctctctctct  | ctgtgtgtgt  | 34672417 |
| gtgcgtgtgc  | gtgtgcgtgt  | gcgtgtgtgt  | gtgcgcgcgc  | gcgcgtgtgt  | 34672467 |
| gtgtattgta  | tatggatacc  | cgtggaagcc  | agaagaaggc  | agttgattcc  | 34672517 |
| cccggagctc  | tggagttaca  | tatgtttgtg  | agctgcccaa  | tgtgaattca  | 34672567 |
| gggaactaaa  | cttggtcctc  | tgccagagaa  | gcaaccactc  | ttaaccaatg  | 34672617 |
| ggctatctcc  | tttgtcttga  | gattgtcctg  | attatgctca  | ctgatatgga  | 34672667 |
| agctctgtct  | tcttactatg  | gttaggatca  | ttcctttggg  | agcagatcct  | 34672717 |
| gaactgtatg  | aaatggagac  | aacaagctag  | gtactggcat  | gcatttgttc  | 34672767 |
| atgcattact  | ccctgccggt  | gactgtgggt  | gtgataggac  | cagttgcttc  | 34672817 |
| agttccctgc  | ttcagttccc  | tgccgcttct  | cagagatggg  | ctgtaacctg  | 34672867 |
| ccgtggtgag  | ctgaaaacc   | ccttctctct  | ttaagcttct  | tttgtcaggg  | 34672917 |
| tgtttatcac  | agcaacagaa  | aagtagacca  | caggtcttta  | ttgcacaacc  | 34672967 |
| caggctagcc  | tgcagttcac  | tgtgcagatc  | aagtttccag  | tgtgcagcag  | 34673017 |
| ctcaccact   | ttgcaagtgt  | gctaatacagt | agtagtttca  | cattcaggag  | 34673067 |
| aacttacatc  | ttagtgggtg  | gtgtgtgtgt  | gtgtgtgtgt  | gtgtgtgtgt  | 34673117 |
| gtgtatgtat  | atatgtatat  | gtgtatatat  | gtatatatgt  | atatatgtat  | 34673167 |
| atatatgtgg  | gggggtggga  | tgggggggtg  | aatagggtgt  | tgcagcatac  | 34673217 |
| ccattagcca  | tctctctcta  | atgaattgtg  | tatcgtatga  | ttcttctctc  | 34673267 |
| agtgttcttt  | actttttatc  | atataaatgt  | tcagtgtact  | tggttagatt  | 34673317 |
| ctaaacttat  | gcatcgtatg  | ttttaagttt  | tgaaatataa  | cttttagtaa  | 34673367 |

|             |             |             |            |             |          |
|-------------|-------------|-------------|------------|-------------|----------|
| aatcttattt  | tcagattggt  | tattactatt  | atttataatt | acaataatgt  | 34673417 |
| attttagcag  | aattttacaa  | acttaaattt  | tggcaaatac | atacatacat  | 34673467 |
| acacacacac  | acacacagat  | agtattcggg  | gatctactat | aactggtacc  | 34673517 |
| taattacagt  | tatctgacca  | aaaatgttta  | atttgcatag | ccttagagcc  | 34673567 |
| taaggatag   | aaccaagctt  | aaggctttac  | tgacttctct | gcctttaaaa  | 34673617 |
| tgtttctctg  | ggtattcttt  | tttgagttga  | ttattttttt | tttgtaattg  | 34673667 |
| atcttatatt  | aatgactaac  | cgactaccta  | cttgctctct | ctttctttct  | 34673717 |
| cttctttttt  | ctcttttggt  | ttttcaagac  | agggtttctc | tgtatagccc  | 34673767 |
| tgggagtctt  | ggaactcgct  | ctgtagacca  | ggctggcctc | gaactcagag  | 34673817 |
| atccacctgc  | ttttctgcct  | cctgagtgct  | gggattaaaa | gtgtatacca  | 34673867 |
| ccactgccag  | gctatgtgac  | atttaagtct  | attagctagt | actttatttg  | 34673917 |
| taaattctaa  | gagattttca  | ttgcagataa  | taatgtcatc | tttgagaagg  | 34673967 |
| acaattttat  | ttcttctaac  | cctgtcactt  | gaactctcac | taattgctcc  | 34674017 |
| gggtttatgt  | gtaggctct   | gcagtcttat  | gttaaagata | agtgatggag  | 34674067 |
| acacaaatct  | ctcactgcct  | tatttttcat  | cccggggcca | ggcatctagc  | 34674117 |
| cttaagcgat  | tctgtattgt  | attagaagtg  | agactttcgt | tcatgccctt  | 34674167 |
| tataaggatg  | aagatgcttg  | agtctgtttt  | tatactgtaa | agattaattt  | 34674217 |
| ttttaaaatc  | ataaatgaac  | attttttcaa  | gtattttttc | tttggggcct  | 34674267 |
| gttgaaaatg  | tcatatattg  | ctttccttta  | ttctgtgagt | tggcaaaagc  | 34674317 |
| tctctgcaaa  | ggaccagtgt  | gatcttgaga  | tacttaagaa | atatgtatgt  | 34674367 |
| tgtctttacc  | tcccgttttg  | gcagataaaa  | cctacagtat | tcctgagtg   | 34674417 |
| agtggtaga   | ccagtgtctg  | tagcaggggt  | agttattcaa | aagaagttcc  | 34674467 |
| aactgtactt  | tccccttcgc  | atagattcag  | gctgagagca | gagtcagctg  | 34674517 |
| aaccaattct  | gtaaataaca  | gattgcttcc  | taacctcag  | agaggtgaga  | 34674567 |
| aataactaaca | gtttagctaa  | ttgccaatgg  | caagggagat | attttaataca | 34674617 |
| atcattttgt  | gaagtggagc  | ctccataaaa  | gcttccaaat | tgtggggcct  | 34674667 |
| gaacagatcc  | tgacgtgggtg | gtgggtgtgcc | tggagaagca | tacaggctcc  | 34674717 |
| aggtttcttc  | ttacatagcc  | gtcccacgct  | tctaatacat | gaggccattc  | 34674767 |
| ctgtgttggtg | tccttcacaa  | taagcctgca  | catgtcagta | aacagtgctc  | 34674817 |
| ccgaattctt  | agagcgggtg  | tagcaaatta  | atgagcctga | ggaggaagta  | 34674867 |
| tattttggtt  | tgctcttaa   | tagctgacca  | gtcagaatta | cagcaggccc  | 34674917 |
| tggacttgac  | tggcatctga  | ccatggggaa  | cgaatctgta | agcagagata  | 34674967 |
| aatgggatca  | gatctgaact  | gaggggcagg  | atccccagct | cgtgtctgga  | 34675017 |
| gtctcagaga  | cttgatggt   | atgagggcaa  | ttccctgctc | ccctatattt  | 34675067 |
| gctgccagtg  | tgttgtgaa   | atgaacaagc  | catagtagcc | acatagtaaa  | 34675117 |
| tatgctagac  | ttttgtgttc  | tgtaaggttc  | cagcacaact | ccttactcaa  | 34675167 |
| gtcctgtagc  | tctcttatag  | tgactcaatc  | cagccactat | tgtgagaaaa  | 34675217 |
| caataaataa  | tcaagtgggt  | agaattgtgt  | tcagtactct | tcacttaaaa  | 34675267 |
| atgggcttca  | gtagatttg   | tccttttaggt | caccctttgc | ccagtcagta  | 34675317 |
| tttctttgag  | tcctggcttt  | gtctgttagt  | ctgccattag | ttgactagcc  | 34675367 |
| aatggttgaa  | ccagccttgt  | gttctgggaa  | tgaacgtcac | ttggctacta  | 34675417 |
| tgtgtcagta  | cttctatgcy  | ctggattcag  | ctcaccacta | ctttgttgag  | 34675467 |
| ggtgtttttg  | tgtctatatt  | tgggaagtgt  | attggtccgg | ctttcttgty  | 34675517 |
| gtattcctgt  | ttgatttcca  | tggcagggtg  | agagcttgaa | taccgttccc  | 34675567 |
| tccaaatttc  | tggagagtg   | tgtataaaaag | ttttgttggg | ggtgttttta  | 34675617 |
| atttttgatg  | ggatggttct  | agcaaattta  | aaaaataaac | acaggaccag  | 34675667 |
| tccagtgctc  | actctccagc  | tgcttgcagc  | agttggtaac | tctgagcaat  | 34675717 |
| ttgttcacct  | tttctagggt  | agaatcgtgt  | gtgcactgac | tcgcttttta  | 34675767 |

|             |             |             |            |              |          |
|-------------|-------------|-------------|------------|--------------|----------|
| attccttttag | gaattacact  | gacacctcat  | tcttcctcct | ggtatthttgtg | 34675817 |
| gtttgcgtgt  | gctttttccgt | ctccattagc  | ctggtcgaag | ccatctttcc   | 34675867 |
| tattggtcct  | ttgaaagact  | cagctgtttg  | tttcatcacc | tgccccccc    | 34675917 |
| ccccgagatt  | ttctgtctaa  | ttccctgggt  | ttctctgtca | tttctcctgc   | 34675967 |
| tgtgtagttg  | ctctgtcttt  | tctccacggg  | aaagcagctg | cggagaccac   | 34676017 |
| ggagctgaca  | cctttctttt  | ctagtatgtg  | tggggttttc | ccttctgtgt   | 34676067 |
| cagtaggggt  | gggcaatgag  | tcacagaggt  | gtagaagtag | tttcctgcct   | 34676117 |
| gtaaacacgt  | ttagtggaa   | tttcagcgat  | aaccaccag  | ggattccctg   | 34676167 |
| ccttgccctg  | ggtgaggtca  | gaagaaggaa  | ggggacacat | ggaagaacat   | 34676217 |
| ccactgtgag  | gtcagaggaa  | ggaagggggac | agtggttgtt | ccttttttcta  | 34676267 |
| tctccaaagg  | tagaggcccc  | tgtgtcattg  | ctcctaacat | ggtctgcaga   | 34676317 |
| aaatgggaga  | ggtagctgga  | gttactgccg  | tttgggtgac | taaagaactc   | 34676367 |
| tcttgatact  | ttggaggaag  | ggtgaggggg  | tgtttgtcaa | ggacagatgg   | 34676417 |
| taaataattht | gatcttcgca  | ggctaccttc  | tttgcacttt | cggctacttt   | 34676467 |
| agcatggcag  | cagtcattgt  | aatatataca  | tggtaggcac | agatgtatth   | 34676517 |
| taataatgth  | ttgttttcaa  | gaaaagacaa  | caggttatth | cagcaggatt   | 34676567 |
| tttcagacac  | cctctataaa  | gcatggcagc  | atagcttatc | ttgattatth   | 34676617 |
| tcattctgcag | agccaggtaa  | ataagccctg  | gcatgcaca  | tcaccaggth   | 34676667 |
| tggaaacatcc | tggctctcagc | actgatccat  | aacagtgcca | cctcgtgtca   | 34676717 |
| agccgagcat  | ctgtgactgg  | aggggactgc  | catgcccgcg | tgtagcctct   | 34676767 |
| ttgccctcaaa | gtcttgca    | catcgaggcc  | tgcaggaaat | gggggtttgtg  | 34676817 |
| cgaaagagth  | ggactctgta  | gcttttagaca | gagctttcca | ttttggaagc   | 34676867 |
| agcgtcaag   | ttttgtctgt  | gggtcttgc   | ctctaattat | gcttcccttt   | 34676917 |
| cactgagggg  | tgtggttagt  | accatacatg  | tgggctcccc | agcaccagcc   | 34676967 |
| tcattgctggc | tttctggggag | ggcttgattg  | gaccctttcc | agggctgatg   | 34677017 |
| ttccttttaa  | cacaagggta  | tgctgtgtgt  | gagagcgaag | gcagaatatg   | 34677067 |
| ggaggtaggc  | ctgtttggggc | tctaaacaac  | cctcatgctt | atacaatcta   | 34677117 |
| gctcacgggt  | gggaaggag   | gttgtgggtt  | gataggatga | gtctggggct   | 34677167 |
| gcaagtgaga  | tgggtcagca  | ggtaaggaca  | tgtgctgctg | acacttgata   | 34677217 |
| acctgagcat  | agtccctgga  | accacagtg   | cactcctcaa | agttgtcctc   | 34677267 |
| tgatctacac  | acacacacac  | acacacacac  | acacacaatt | ttaaaaggaa   | 34677317 |
| agggctgagg  | ctactaaatc  | cagttcagca  | acttactggg | tgagtgacc    | 34677367 |
| tgggcatata  | atttaacaac  | tctgaattcc  | agttcagtca | tctataaaag   | 34677417 |
| aaagaggccg  | acagcttccc  | agctctgtta  | tcggatttgc | tttgacctat   | 34677467 |
| gacctgggct  | gggggcaggg  | ggacagggaa  | tgacagacaa | gagtctacgg   | 34677517 |
| agatccacaa  | ccaaattgaa  | aacctgaagg  | gaaaagccaa | tcagagccat   | 34677567 |
| gctataatth  | cgaccagtgt  | ttacctctt   | tcttgthtct | ggctacaaaa   | 34677617 |
| cacatagctg  | cctcaccaaa  | ggccagaaac  | agtggggcca | accagttaca   | 34677667 |
| gactggaagc  | tccaaaactg  | tgagtcacaa  | ttatactgtt | ggttatgtht   | 34677717 |
| gthtatcgtga | aggaaatcga  | ctagtaaaac  | caggatgtgg | aaatacagga   | 34677767 |
| tggthtacgth | ccctcacaca  | aatagaacgt  | ggacatacaa | gatggatgct   | 34677817 |
| tttcttctcc  | ttgggtgtht  | ctgggctgaa  | gggtgacagg | tgtgactcgg   | 34677867 |
| ggctaggtht  | ctgagthtct  | tgtaaacagg  | ggtcattggg | tatggcttht   | 34677917 |
| gccctggcct  | gtcgtctcagt | aaggthcact  | ggaatgagaa | cctgggggag   | 34677967 |
| ccagattcag  | tttgggtggag | ccagthtatgg | gccggatgaa | atthtggtht   | 34678017 |
| accaggatth  | ctggctctga  | ccaaatactc  | atcaccctcg | tgactccca    | 34678067 |
| ctgagagaag  | gagggtgagc  | agcctctctt  | acggcctgtg | atccggagth   | 34678117 |
| tctgctthtct | gccaaaggth  | cagthtcccta | ggcacagctg | tcgggggatg   | 34678167 |

|              |               |              |              |              |          |
|--------------|---------------|--------------|--------------|--------------|----------|
| ggatccttgc   | ctctcctgca    | gtaagtcagt   | gaggcaaaga   | cacttctgct   | 34678217 |
| tctagccaac   | tcagctcatc    | ccatactgag   | gcctcctgcc   | cttgttccca   | 34678267 |
| ttttatagat   | gattgtttga    | gagctaaagg   | gtttttaatt   | aattaattaa   | 34678317 |
| ttaattaaatt  | aatattatth    | tttacttagt   | ctctttatat   | cccactcact   | 34678367 |
| gcccctcctg   | gttaccgctt    | cccataagcc   | ttcccccatc   | tccagtcctc   | 34678417 |
| ttctcatctg   | agcagatggg    | ggcctctgtg   | ggtatthttct  | cacactggca   | 34678467 |
| cttcaagtct   | ctttgtggtg    | aggcgcttcc   | tctcccactg   | aggccagaca   | 34678517 |
| aggcagccga   | gctagaagaa    | catatcccac   | gtacaggcaa   | cagctthttgg  | 34678567 |
| gatggthccc   | actgcagttg    | tttgggaccc   | acacgaagac   | caagctgcat   | 34678617 |
| tcttctacat   | gtagacatcc    | agttagtcga   | gcaccattta   | ttgacgatgc   | 34678667 |
| gttcaththtt  | ccattgtatg    | gtthttggtht  | ctthtatcgaa  | aaaagtcaac   | 34678717 |
| tgtccatagg   | tgtgtggctt    | tgtatthttgtg | tctctgattc   | gattctattg   | 34678767 |
| atcaacgtgt   | ctgtthtctat   | actaatacca   | tgtctgthttt  | atcactattg   | 34678817 |
| ctctgtagtg   | cagcttgagg    | tcaggaatgg   | tgattctccc   | agaagthtctt  | 34678867 |
| ttattgttca   | ggattctthtt   | ggcaatcccg   | gggtthtttgt  | thttgccatat  | 34678917 |
| gacattgaga   | attgctcttht   | caaagtcgat   | aaaatattgt   | gthtggathtt  | 34678967 |
| tgatggggat   | tgcattgaat    | ctgtagattg   | ctthttggtaa  | gatggccatt   | 34679017 |
| thcactatgc   | taatcctacc    | tatccacgag   | catggggagat  | ctthtccatct  | 34679067 |
| tctgagatct   | tcttcagthtt   | ctthtcttcag  | ggacttgaag   | thcttgtcat   | 34679117 |
| acaggtcttht  | cacttgcttg    | gttagagtca   | caccactata   | thttatatta   | 34679167 |
| thtgtggcta   | thtgtgaaggg   | tgttgtthtcc  | ctgattthctt  | tctcagcaca   | 34679217 |
| thtatccttht  | gtataaagga    | aggctactga   | thtctcggag   | thtaaththtat | 34679267 |
| gttcagthtg   | thtgtctgaag   | gtgcttatca   | gctgtaggag   | ctctcagata   | 34679317 |
| gaaththttgg  | ggtcacttag    | gcatattatc   | atgttatctg   | caaatagcaa   | 34679367 |
| tactthtgact  | tctthccttht   | caatctgtat   | cccctccatc   | thctthtagtht | 34679417 |
| tctcctcttg   | ctctagctag    | aacttgaagc   | accgtatcga   | atagatacat   | 34679467 |
| agagagagtg   | gacagcctcg    | tcttgaccct   | gattthtagtg  | gaaatgcttht  | 34679517 |
| aagththttct  | ctcagagagt    | taaaaththta  | aagaththaat  | ggccatggta   | 34679567 |
| gatccatgac   | tctaaccgaa    | tagaggggtg   | agagthaatgg  | thcaththgtca | 34679617 |
| tctctthtgct  | gtaggatctg    | gaagacgatt   | atctataaag   | aaacaggtaa   | 34679667 |
| tgccactacc   | caththggctt   | atgtgtggct   | tacaagagtc   | ccacgatgta   | 34679717 |
| tatggcccac   | ggcaagtgtc    | cataaaacct   | taggtattat   | tatgatgcac   | 34679767 |
| thththaaatt  | tgtthctacca   | thtcaggctta  | ctgtththtat  | thcactatta   | 34679817 |
| tgaaccaaac   | tactatgatt    | atctthtatcc  | aaatggthttg  | ththtctcctt  | 34679867 |
| tgtatcattc   | cctthgggtg    | cagthccgaga  | aaagcgtthg   | cagatgaaaa   | 34679917 |
| gggatagccc   | thctthttggc   | thtcatccat   | gthtgtcagac  | agctctgatg   | 34679967 |
| tgggatggtht  | thctcagaag    | gcagctgcgt   | tagagactca   | gthtctaaggt  | 34680017 |
| ctgtgggtgc   | cgggtgtgag    | cacctgggga   | aaatggggag   | aaaactggag   | 34680067 |
| agagaacagc   | tggthtggggc   | ctggagthtt   | ctgcctcagg   | cctthtctggc  | 34680117 |
| aagactthtac  | tcaaatcact    | gtctthcagga  | gthththtctg  | ggcacactct   | 34680167 |
| ccatgatgcc   | agcctcactg    | atththtctcca | caatgccagc   | thcactgatt   | 34680217 |
| thctccacaa   | tgccagcctc    | actgaththt   | atgtcctthg   | tgactthatt   | 34680267 |
| tctthtcatc   | thtaagctctt   | accagcatg    | agththatttht | atthgaccttht | 34680317 |
| thcaththatta | thtaththatt   | taththatt    | atthtctcctt  | thcctcttha   | 34680367 |
| cacagthgaac  | thcaththgagac | caathththtt  | taaaatactt   | aaagthttacg  | 34680417 |
| thgatathatt  | tactthatttht  | gtgcatgtag   | ggatgcatgt   | gtaggcgcat   | 34680467 |
| gctthgctgtg  | gtgtgcatgt    | agaggtcggga  | gaacaactthg  | tggthtgttht  | 34680517 |
| ctcctthccac  | catgtgggtc    | ctgaagcttg   | aactcaggtc   | thttagctthg  | 34680567 |

|             |             |             |             |             |          |
|-------------|-------------|-------------|-------------|-------------|----------|
| gcagcaaatg  | cctttacctg  | ctgagccatt  | gtgctggcct  | gaggcaaaga  | 34680617 |
| tatttaaaaa  | atattttgat  | ttattttttg  | agaaactcac  | atataaatta  | 34680667 |
| tatatatata  | tatatatata  | tatataaaaa  | tttgtctact  | caccctcccc  | 34680717 |
| caccccaccc  | ccagtttaac  | ttcttccaac  | tttgagttgc  | tgctgctggt  | 34680767 |
| gttgttgttt  | taaaataacc  | cactgagtcc  | aatttgtggg  | acccatatac  | 34680817 |
| aaataaatac  | aaataagtgt  | gtggccatcc  | actggagcat  | ggccaatctg  | 34680867 |
| caagggggcca | catccctaaa  | ggagactgac  | tcttcatctc  | ccagctcatt  | 34680917 |
| agcccccatc  | ccatccacgc  | tggtgtgtgt  | cttgcattgg  | tttgtgcaga  | 34680967 |
| ctgccacagc  | ggttgttatg  | ttcatgagag  | tagcactact  | gacatgtcca  | 34681017 |
| gaagacactg  | tttggccccg  | aattccccac  | cctccagctc  | ttacagtttt  | 34681067 |
| cttcttttct  | ggagtgtctc  | ctgagccttg  | gggtagggat  | gtgaatagat  | 34681117 |
| gtcccattta  | tgaccgagca  | ctccaccaac  | atactggatc  | tctgcccttt  | 34681167 |
| gaccattgag  | gaaaagggtc  | atatgcaata  | gtaaaacat   | gcccttggtg  | 34681217 |
| tagcagcacc  | agcacacagc  | ctgtgagagt  | tgaatattga  | atataatgaag | 34681267 |
| gtgttgaaaa  | cttggttaaga | agggtaaaca  | tttaaaaggg  | caaagctgt   | 34681317 |
| tattatcttt  | gaggggtgtt  | actctttatt  | ggtacttagg  | cccctattgg  | 34681367 |
| aggctactag  | ggctggacat  | gaatatccct  | ggtctattag  | gggttgtttt  | 34681417 |
| aggtcttcat  | tactggtaac  | aaactacctc  | gaacgtagtg  | gcctatgctc  | 34681467 |
| tgatttgaaa  | agaagaggga  | agaggtgcct  | gagtgactga  | gatggctaga  | 34681517 |
| ggctagaatc  | atgtgagatc  | ttcccttatc  | accctctggg  | atccaggcat  | 34681567 |
| gctaagcagg  | gaagctatca  | ggacatcacc  | tgcctgaggc  | ctgcttgagg  | 34681617 |
| cctgccttag  | gcctgcctct  | gaggcctggg  | tttcctcaca  | gcatgggtggc | 34681667 |
| tgagtttctg  | gaggagggtg  | tcccacaggg  | acacatttat  | ttagtgagac  | 34681717 |
| ccacgtgagc  | tttgtgttgt  | tttcctgccc  | agccttagag  | gtctcacact  | 34681767 |
| gtcacttctt  | cagtagtcta  | ctgggtcaaca | cagctataag  | cctgctcaca  | 34681817 |
| ttcaaaggac  | agggggccaaa | gcccttcttt  | aattgtcatg  | acatcttcat  | 34681867 |
| aacaggacag  | ttcttctcta  | ccttcatctt  | aagtgagtga  | gcttcattaa  | 34681917 |
| gacaggggtc  | gccatgggta  | tctaacgagt  | tatctggcac  | ataatgaata  | 34681967 |
| ctcagcaatg  | agaaaacaag  | ggtgtagatg  | gctttcatgg  | atgtcttata  | 34682017 |
| acacttgtct  | ctctaggatg  | gccttgcattg | cctgtcacta  | agaggtatgt  | 34682067 |
| ggttagtgtc  | aggtataaat  | gaccaaacac  | acaagatgat  | tgagtacagc  | 34682117 |
| ttggggggaag | catatggcaa  | tgaaatgtgg  | tcttcatggc  | cttcacaacc  | 34682167 |
| aacagctgcc  | atcttctggc  | cctcaacatc  | accattttt   | tttaaccact  | 34682217 |
| tcctgccatc  | cattctcata  | agcagcattg  | gagtgtctac  | attacggcag  | 34682267 |
| cacctgaggt  | gaactcagtt  | gccccctgtg  | acaatcctat  | gagatgaggc  | 34682317 |
| tattatagtt  | tggagcgtgt  | gtcttccaaa  | aagaaatgta  | ttaaggctgt  | 34682367 |
| gatctccagt  | gtggcttgct  | gtaacaaaat  | accctaaca   | aaacagctga  | 34682417 |
| agggagaaaa  | ggattaattt  | gactgtcagt  | ttgagtgtat  | agtccatcac  | 34682467 |
| agtgggggaag | gcaaggcagg  | cagtatgagt  | gcgaagctgc  | tggccacaga  | 34682517 |
| gagtcaggag  | cagagagtta  | tgggtgcctg  | cactcagcta  | acttccacct  | 34682567 |
| ttttatgaag  | ccgaggattc  | cagctctaag  | gatggttcag  | ttcttgtttg  | 34682617 |
| gatggaccgt  | tcctcttct   | caattaaacc  | agtcaagata  | attgcttaca  | 34682667 |
| gttgtacccc  | aaaccaatgt  | tttctagata  | atccttcata  | gatgtgcctg  | 34682717 |
| aaggcttgtc  | tctttgaagg  | ttccagatct  | cgtctagtgt  | acaacaaatc  | 34682767 |
| attaattggg  | tagaaagaca  | gtggaacctt  | taagaggtag  | gacctaattg  | 34682817 |
| gaggtccttt  | ggtccctggg  | catgtatctt  | tgttgggtggc | agtgggactc  | 34682867 |
| cagccccgtc  | tctctctctc  | tctttttttt  | tgtctccttc  | ttctcttcat  | 34682917 |
| gaccatgaat  | tgagtgaatt  | gtatccacct  | tgggcttctg  | ctgtgggtatg | 34682967 |



|             |            |             |             |             |          |
|-------------|------------|-------------|-------------|-------------|----------|
| cctccacag   | cccaaagcag | caatggggcc  | aactgattaa  | gggctgccat  | 34683017 |
| ctttaaact   | gtgaggcaaa | ataataattt  | ttccttttgt  | gttgatttcc  | 34683067 |
| ccagggtgtt  | gatataaaa  | cagaaaactg  | atcgggatgg  | ttaatatcag  | 34683117 |
| tcattaactt  | ggtgagatct | agaatcacca  | tggagactgg  | cctccggggc  | 34683167 |
| tgcccgtgga  | ggattattct | gattcatcta  | attgatgttc  | gagtagctga  | 34683217 |
| acgttgtggg  | tggcgcctct | ctgagggcag  | ggactgtata  | caacaggaga  | 34683267 |
| cagtcgggcg  | caagcattcc | ccactctctg  | cttcttggcc  | tgtacaatgt  | 34683317 |
| aaccagagcc  | ttggagctct | gctgctgtca  | cttgcccacc  | ttgatggatt  | 34683367 |
| gtgacttcag  | gatttgagcc | gagaaacacc  | ctttctccct  | taagttgctt  | 34683417 |
| atgtcagcgt  | ctcccccaac | tggccaagta  | tggcaacaga  | aagcataacc  | 34683467 |
| gacacactga  | cacatcgatg | gctcctccta  | gtaccccgtg  | tttcagatga  | 34683517 |
| ggaattagag  | ggaccagac  | acaggaggct  | gcagcaggcg  | cttcctgggt  | 34683567 |
| cacagttggg  | agaactgtat | agtaactgca  | gggccacctt  | ggaagatccc  | 34683617 |
| tggaatgggt  | tgacttgctg | tttgggtactt | actgttcttt  | caaatgtaaa  | 34683667 |
| ccaggaagg   | ggatctttgc | ttttcatgat  | tttaatgtac  | aattagtatc  | 34683717 |
| ctagaaattt  | ttcagaaaat | aacccccccc  | cccccgcccc  | gtgtcttgct  | 34683767 |
| ctggccctag  | ttcagctaaa | gtattaattt  | tagaagagga  | gacatcaaca  | 34683817 |
| ctacttaact  | gttgtgttcg | ttgactaatt  | tgtactgttt  | caggctacaa  | 34683867 |
| ccttgagggt  | ggaagctcac | tatgagtttt  | aatagcttat  | ggtgagggtga | 34683917 |
| caacatthttg | gcctcagact | aagaaatc    | ttcagacagg  | cttttttttt  | 34683967 |
| tttttttttt  | tcccagtgcc | aaaatttaac  | cagctggaat  | tgttttccat  | 34684017 |
| ctcagtcagt  | ctttctaagt | caagcaattt  | gccttttatt  | gggaaatctg  | 34684067 |
| cattttaatg  | tatagataga | acattctgtc  | cttggtctca  | ggatacaaga  | 34684117 |
| aactgggtct  | ttgttttatt | gtctgatctg  | ggtgtcttcg  | taagggatca  | 34684167 |
| aataccagca  | agtttgaagc | ttaccagggg  | gaggcaactg  | tccctcccag  | 34684217 |
| tgagactcag  | agcttgtgaa | aggagtgggc  | gaaagatcca  | caagtcaggg  | 34684267 |
| ggaagagagc  | accaccgctc | ctcgatcctc  | gacagcatag  | ctcttgccat  | 34684317 |
| gccctgatct  | ggagccccgt | gacaggcttt  | caggatgtga  | gctctgctct  | 34684367 |
| acaatggaga  | gttccttagc | cacggctggc  | tactgacct   | gcttcaagtc  | 34684417 |
| atcacttcag  | agagcatggt | cttaactcct  | gggacgctgc  | tactcagcc   | 34684467 |
| tgctactatt  | ttcatcccac | cattgtatct  | gaggttacct  | aaagcgccac  | 34684517 |
| gtgttgga    | gagaccttca | cattcttttt  | aactgtgttt  | aaactgggtg  | 34684567 |
| gagagcctgt  | cacttcaaaa | tgcattgcata | taaacttact  | gtctctgtgg  | 34684617 |
| cccaagggca  | cagtattggc | aacagtttga  | tgcccgtacc  | ttgccaaaac  | 34684667 |
| cagacaatga  | gagtcatttc | aatgctgggc  | cattgtgagt  | caccagaggt  | 34684717 |
| agtgattctg  | tgtttaaaa  | ctctggcgat  | gctggctgta  | gttccaagtt  | 34684767 |
| tttagctctg  | tgacccttgt | ctgccgttgt  | cacctttcct  | cactttttaa  | 34684817 |
| atattaaact  | agttgtcttt | ttctttttga  | gttctagaaa  | ctctccaggt  | 34684867 |
| gatgctatth  | ggacagatct | tcaagaaatc  | tctgtacaca  | gttttatctt  | 34684917 |
| ttgaacatgg  | aattgatatt | tggaaatggt  | tgtcacttga  | tggggctgag  | 34684967 |
| tcagaatgaa  | caactaaag  | cagtgttatt  | ttagtaatca  | tatgtttgga  | 34685017 |
| actatgtaag  | cctgtcctag | atgtggcatc  | tgagatgacc  | aagactccat  | 34685067 |
| agtgtcagag  | gggtgcctgg | gatgcacaat  | taactgacta  | gttgagaaag  | 34685117 |
| ctcttgaaaa  | tgtcacgaat | gtgcacctta  | aatattttta  | cttgacagcag | 34685167 |
| ataatataca  | gctttgcaga | ctttcactcc  | gagggaaacac | gttcgtctgt  | 34685217 |
| gggtttgttg  | acaggagtca | acattatatt  | tcttgcatag  | gctgtgcttt  | 34685267 |
| taaggcattt  | aaccttttaa | agccatcaga  | gcacagaaca  | cttatagttc  | 34685317 |
| ttataattht  | ttcctcattt | ttaaagtgtg  | ctcaatcaaa  | cataatthta  | 34685367 |

|             |             |             |             |            |          |
|-------------|-------------|-------------|-------------|------------|----------|
| caatgattct  | gaataattct  | atcattcagt  | gttcagagaa  | acaattcttt | 34685417 |
| tgtaaatatt  | taatgacttc  | atagactatt  | aaaattatat  | gcaaatttag | 34685467 |
| tcatacaatt  | gcaataataa  | atataaccag  | catagacaat  | tttaagcctg | 34685517 |
| ttgactcttg  | gtaagcacat  | agctcgcttg  | caggcatgag  | atgtgtggga | 34685567 |
| tagattagag  | aactggagat  | tagcctatta  | gtcttcaaca  | ttcaacacaa | 34685617 |
| tgtggtatca  | gtcagtatct  | tgcctgtggg  | gagtttagtc  | atcctagtgt | 34685667 |
| tgttggcttc  | tagggtaatc  | ctggtaagtg  | taaggaatta  | aaaagagatt | 34685717 |
| ttcctgtagc  | ttctgtggag  | gaaaggaaac  | agaagagcaa  | agaaatagac | 34685767 |
| tgcaggatga  | aagagaacat  | ttgcaacctg  | ttacttcagc  | aaggggttaa | 34685817 |
| tatccagaat  | agataagaaa  | cccaaaagac  | tcagcattag  | gccagacttg | 34685867 |
| gtagcacgtg  | cctgcaattg  | gaagtcttgt  | ggaagaaggc  | tgtgggtttg | 34685917 |
| aggcaagctt  | ggactaaact  | atctagtggag | acctaactct  | agaaaaagaa | 34685967 |
| aagacaaata  | aagaaaagct  | caatagcata  | aaaaccactc  | caggaaacaa | 34686017 |
| gtcaatgaca  | tgcataaata  | cttctcagaa  | gaagacatgc  | aaggaaggag | 34686067 |
| ctggcaaata  | tattaaagag  | tgtccagatc  | attagtcact  | gggaagggtg | 34686117 |
| tgcaactgga  | aaccatgagc  | tatcctctcc  | tccagttacc  | atggttactg | 34686167 |
| gtacaaagac  | tagagagagc  | atgtgtagtg  | aggatataga  | gggggagaaa | 34686217 |
| ctcttccaca  | ctgctggatg  | ccagttaagt  | catacaacct  | gtctaaaaca | 34686267 |
| gtatgaagag  | cctgtataaa  | gtaaaacagc  | cacaacaaaa  | actagcgtgg | 34686317 |
| gatccagcaa  | gcccaccaa   | gggtatatat  | atagcctaag  | gaatcttcga | 34686367 |
| ggtgtctgaa  | cttccatgct  | tttgatagca  | ctatttccag  | tagtcaagat | 34686417 |
| atgcaaccac  | acaatgaatt  | attatttagc  | tctaagaata  | atgaaatcgt | 34686467 |
| gtcatcttca  | gcaacgtggg  | cagacctgga  | ggacaaatga  | taaatgaaat | 34686517 |
| aagtcagtca  | ttgaaagata  | tatatttgtg  | gttctcaatc  | atttcttttt | 34686567 |
| attcatttat  | aaggcaatta  | taatatatga  | taattcatga  | tatgtttcaa | 34686617 |
| aatacctgga  | agagttttga  | gatccccaac  | acatagaatt  | gataaatatt | 34686667 |
| tgagatagac  | atagttactt  | tgatttgatt  | gtcatacatt  | atatacatgt | 34686717 |
| attaagttac  | catgcatatc  | tctaaatggt  | atatatcaat  | taaaatagag | 34686767 |
| ttgtaatgga  | catttaaate  | tgagaggttc  | tggaaactttg | ggagacgggg | 34686817 |
| cctactttga  | aggttacacc  | tgccccctcc  | ttcctgtggg  | gcctcctctg | 34686867 |
| cttctctggtc | tggaatgatg  | ggaacggcct  | gcaccacaca  | tccctcccta | 34686917 |
| ctccagggac  | tgaactcttc  | ctctgtgtcc  | tgcccacctt  | gatggactga | 34686967 |
| aaccctctga  | aactgtgagc  | tgagataagt  | tctctcaatt  | ctttctgtca | 34687017 |
| ggtgtttggt  | cacagtgctg  | tgaaagtcac  | ggatgcagga  | actcataaat | 34687067 |
| ggtgtcaaac  | caccttcgat  | gtctacttaa  | gcttaccag   | ggatacttcc | 34687117 |
| acctaagaaa  | ccaaattggt  | ctgaataagg  | gcgggcttct  | ctccagctaa | 34687167 |
| gatttaccgg  | gtgactgctg  | tgccaaggat  | gggaacctgt  | gcttaacctg | 34687217 |
| ggttacttta  | aatgctcata  | aggattaggc  | atccttaca   | caccagtgga | 34687267 |
| gatatagggtg | ttgatatctc  | cactgtaagg  | atgagaaaac  | acacagccag | 34687317 |
| caaataacag  | aagcaggatt  | tgaaaccagc  | caggttgatg  | cagtgacca  | 34687367 |
| actctcagcc  | acagcatagt  | ctctggaaaa  | gcctgaggaa  | gtggacgcaa | 34687417 |
| catcttatgt  | tgtgatgtaa  | tgtgagctga  | ggagacggat  | agtgcagcc  | 34687467 |
| tgcaatccca  | gcaactggaga | ggtggaagat  | gaaagatgag  | gagtgattgt | 34687517 |
| gttgtcaggt  | ctgaataact  | gcatctaata  | actgaaggct  | tgggctggag | 34687567 |
| agatggctca  | gtgggttaaga | gcaactgactg | ctctgccaga  | ggtcctgagt | 34687617 |
| tcaattctca  | gtaaccacat  | ggtggctcac  | aatgatgtgt  | catgggatct | 34687667 |
| gatgccctct  | tctagtgtgt  | gtctgaagac  | agctgcagcg  | tactcctata | 34687717 |
| aataaaaaaca | taaatcttaa  | aaaaaataac  | tgaaagtctt  | gggagaggcc | 34687767 |

|             |             |             |             |             |          |
|-------------|-------------|-------------|-------------|-------------|----------|
| aacctaaact  | ttcatattca  | gaaaggggaac | agaaattagt  | taaggcagta  | 34687817 |
| accttgactt  | ctgtcagatt  | tcattcatta  | acctggtttt  | ctacggccta  | 34687867 |
| gaactgattt  | cacattctgg  | agactcagat  | taagaacata  | ccaccaccct  | 34687917 |
| acaggagctc  | atagatacag  | atgggatata  | caagaaagct  | gtaaggttag  | 34687967 |
| agagcgctct  | aggaggactt  | cactacagtc  | ctacagatgt  | ggatatagac  | 34688017 |
| atrtcaggat  | atcaggttgg  | aataagctgt  | tccaagtagg  | tcagtagtac  | 34688067 |
| agagaggagg  | tatgtgtgcc  | acagcagatg  | tgtgaaggtc  | tggccttaga  | 34688117 |
| tgagaccggc  | gaattgaaga  | aaggccatgt  | cataccattt  | ttggagactt  | 34688167 |
| tgaacttaag  | catggagagc  | gtcgaaaacc  | atgacttccc  | ataggggaagc | 34688217 |
| aacaggacca  | gatttgctca  | gagatccctt  | attaaaatga  | tgaatggctt  | 34688267 |
| agagacagag  | ttccagtgga  | ctcagatgat  | ggtaggggtg  | ctaattagat  | 34688317 |
| tactggggta  | attcaagtga  | aaatgagccc  | tgatcaaaaag | ccaacaaaaa  | 34688367 |
| gaagctttgc  | atgagcacca  | ggaacactgg  | attcaggcca  | ggagggcagt  | 34688417 |
| gtggcttaca  | tctgattctg  | ctgctaataa  | gctggttatc  | tccatctctg  | 34688467 |
| agtcttatca  | aaatgggggc  | actttgccct  | ctccagtttg  | tgtcctagga  | 34688517 |
| ccggtgagcc  | cgtgtgagga  | caagcattca  | aggaaggat   | ctgaagccag  | 34688567 |
| ctggggccagg | aatggtttca  | gcatgggtga  | gaagatgcgg  | ctggaagtga  | 34688617 |
| ggcctgtggc  | tagctcaggc  | tgccagagga  | ttatgtgaga  | gataaaggca  | 34688667 |
| gctggggaaa  | gaagagcacg  | ctcacatttc  | aggagaatta  | gctccaacct  | 34688717 |
| ttgattcctt  | agcacactga  | ggcttctgta  | ctctggagat  | gtcagttgta  | 34688767 |
| ctctatgtta  | ctttcttatt  | cttatttctt  | tattattacc  | acaggatctg  | 34688817 |
| ggaactgtga  | caagtgatat  | acatactctg  | gacagacaga  | cagcttctgc  | 34688867 |
| ggcagcagca  | actcccaagc  | cataggccct  | gagaggactc  | aaaagtcccc  | 34688917 |
| agtcctcag   | ataaccttat  | gcctctcggt  | gagtgtcaca  | gggtcttagt  | 34688967 |
| cccagacata  | gaggtgggaa  | gtaaactgga  | tttgagcaag  | gggccaggct  | 34689017 |
| cagcatgggc  | cacttggtta  | gccttgcccc  | tgggaagaaa  | actttgaaaa  | 34689067 |
| tgtggtcaca  | gccataaccc  | atgacataca  | gttttttaaaa | tacaggtatt  | 34689117 |
| cttggatttc  | agaatagaa   | aagacaaaca  | aacaaacaaa  | caaacaaacc  | 34689167 |
| taaactctgg  | agtttgagc   | catagctgag  | ctccagcttt  | accctacaca  | 34689217 |
| gaccatggaa  | gtcactgaac  | ttttctgagc  | gagttccctt  | tattgaaaag  | 34689267 |
| tgagaacaag  | cttgccctgcc | ttgcatgact  | aaagcatggg  | ggagtgggag  | 34689317 |
| agagagacag  | gctagaatga  | tgtataatga  | cacacatgta  | tgacaataca  | 34689367 |
| gaagcatttg  | agtcgatagt  | atagtaatta  | cttttctctg  | cactgtgaca  | 34689417 |
| aagttacaga  | atcgcctttt  | gtgagggcag  | ggtttcttcc  | agtttacagt  | 34689467 |
| cagaagtgat  | gtagcctgtc  | ctggcgaagg  | catggcagca  | agagtgtgag  | 34689517 |
| gtggcagtca  | catggcagct  | gcagtcaaga  | aggggagagc  | gatgaattct  | 34689567 |
| ggtgctcagc  | tcactcttac  | tttttttaaa  | aaagatttat  | ttatttattt  | 34689617 |
| atrtatttat  | tttatatata  | tgaatgagca  | caccgttgct  | atcttcagac  | 34689667 |
| acaccagaag  | agggcatcag  | atcccattac  | agatagttgt  | gagccaccat  | 34689717 |
| gtggttgctg  | ggaattgaac  | tcatgacctc  | tgggaagagca | gtcagcgtta  | 34689767 |
| ttaaccactg  | agccatctct  | ccagccccac  | tttcacattt  | tttattcagt  | 34689817 |
| tcagaatgga  | acggaacatc  | acatggaatg  | gtgcagccta  | cgggatgggt  | 34689867 |
| ctccctcct   | cagttaacac  | actacctaga  | gactacctct  | cagacacacc  | 34689917 |
| tgttggtttt  | cttccatgat  | gatttgcatt  | gcatgaagtg  | gacaatcaag  | 34689967 |
| atcagccacc  | acgggctgtg  | tagctaaatg  | gaaagctgct  | agggtaggtt  | 34690017 |
| tggcaaaagc  | agaagtaaaa  | tgagcacaca  | cagagagaaa  | cttatccaca  | 34690067 |
| cgttgtgggt  | ttggggctga  | ggttgacatg  | cctcactcag  | cccagttacc  | 34690117 |
| tgctgagacg  | gttctggcac  | actgcatggg  | aacagtgggt  | gttatagagc  | 34690167 |

|             |             |             |             |             |          |
|-------------|-------------|-------------|-------------|-------------|----------|
| ggtatgtttt  | ggatgacatg  | agcttttctca | athtagttct  | taaaggcaaa  | 34690217 |
| gagggcccc   | tttcccagga  | aatgtcttac  | atgctcaggc  | tctccattta  | 34690267 |
| tctgttgtaa  | actaagttgt  | gttgctttgt  | gttttacaac  | aaagtaagga  | 34690317 |
| ctacagcata  | gacgctggat  | ctgcccaggc  | tcagggtgtac | tgtgttctgc  | 34690367 |
| tctggaaaga  | actgacctgt  | agtttcaagg  | tccagtgcac  | ttcagagtcc  | 34690417 |
| cttcttccca  | cttttcaccc  | cacagtttct  | acttgcaatg  | ttcacacttg  | 34690467 |
| aattaatgag  | aacaattata  | ttaattttat  | attcttgcca  | aaattccatg  | 34690517 |
| ttctagttga  | cttactcagt  | aacatattca  | ggggcgaaat  | gatgaggact  | 34690567 |
| ctcgtgtcta  | gggtacctgg  | ggactattcg  | ccttggttac  | atltgaggcc  | 34690617 |
| tcaggcttta  | tggaggcaag  | aatgcctttc  | tgttacaggc  | attaataact  | 34690667 |
| gacattcaca  | aattaccctt  | cctttaaaaa  | aattcacttt  | ggagagaagg  | 34690717 |
| atcaggttct  | taatttacat  | tttaaaaacc  | gcactctatt  | cagactctta  | 34690767 |
| tctctagagc  | acaaaagaaa  | agcaagaaaa  | aatataaatg  | gaccaagct   | 34690817 |
| cacttcacga  | tcctctataa  | gacgtcaaaa  | tccaaagatg  | ttcaagtccc  | 34690867 |
| atatattaaa  | tgtctccata  | tttgcattga  | acctgccctt  | tctacatctg  | 34690917 |
| ttaaaccatc  | ttccctttta  | aaaattttgt  | gagtatgtgt  | atattttgtg  | 34690967 |
| acgtattttg  | gtgaatgcag  | gtgtttgtgt  | gagtggtggg  | gtcagacggc  | 34691017 |
| aacctcacat  | gtcgtctctc  | agcttctata  | gtctttgaga  | cagggctctc  | 34691067 |
| cttttgttat  | gtgacacagt  | gtgctccaga  | ctagctcatc  | tgcgagcttc  | 34691117 |
| tggagattct  | cttgtttctg  | cttctcatct  | atccacagaa  | gcactggatt  | 34691167 |
| ggcgattgtg  | tgctactgtg  | ccagcttttc  | aatggctgat  | gttttagtta  | 34691217 |
| tcaactcaac  | acagtctaga  | ctcacctggg  | aagggagtct  | caatgagggg  | 34691267 |
| ttgggttagat | caggttggcc  | tttgggcatg  | tctgtggggg  | attatcttga  | 34691317 |
| tgatattaac  | tgaggtgggg  | tggcatgtcc  | actgtgggtg  | gcaccattcc  | 34691367 |
| ttggggtagg  | gattcaggaa  | tggataatag  | cagagaatgt  | gctctgagct  | 34691417 |
| ctagtagaca  | ttccttctct  | tttgttatgg  | attatagatg  | taatattctt  | 34691467 |
| gctgctgctc  | gactggccag  | gaagaatgac  | gctgcaacag  | gatccttctg  | 34691517 |
| cacacgttta  | ttgggagagc  | ttgattgtag  | aggcgaaaaa  | gacctcgagc  | 34691567 |
| ccagaactgg  | tgctgctttt  | ataggcctag  | gaggggctgt  | tctcacaccc  | 34691617 |
| cgattgggta  | tgcactaagc  | ctcatttgca  | tgttctctcat | ctgattggct  | 34691667 |
| actctctctc  | agtaccttac  | agaacctcat  | tatcatgcc   | gggccaggca  | 34691717 |
| gtgtctttgc  | aaaaaacttt  | actgcataatg | tacacattgg  | ttgtttgtcc  | 34691767 |
| aaacttatgc  | gtggtggcca  | gcagtagtca  | gtgccactct  | gcaacggcac  | 34691817 |
| atgtggcttc  | ccacataata  | tgaccagctc  | cttcaagccc  | ctaccaatgt  | 34691867 |
| gacttttctc  | ctgtgatgga  | ctataacctg  | gacctgtgag  | ctcaattaag  | 34691917 |
| ccctttctct  | cccatgttgc  | ttggaatatt  | ttatcacagc  | agcagaaaagt | 34691967 |
| gatactagac  | aagtaggttc  | cggggataca  | atctggagtc  | tgcattgtgc  | 34692017 |
| ctctaatacac | ctctcttttt  | aaaaaagtat  | gtattttgtat | ggtgtttgtg  | 34692067 |
| ctcctcaagc  | tctttaccta  | cagggccact  | tccccagccc  | tcctttaagt  | 34692117 |
| cgtctctaga  | ctttacactg  | tattatttaa  | ggaataataa  | agaacagaaa  | 34692167 |
| gaaaaactct  | gtgtgttcaa  | agaaactcaa  | ttttgttttt  | tgttttttgt  | 34692217 |
| tttttgtttg  | accaaataca  | tttgaagatg  | tagagagaga  | agggcccaac  | 34692267 |
| tgtaagtaaa  | tatgtggatc  | ttaagaaatt  | tccaaaacag  | tcctgtctct  | 34692317 |
| gtccctgcag  | agcagggtgtg | gcagaggctc  | ctgtgactga  | cagggcactt  | 34692367 |
| caggcttgac  | ccagatgtgc  | ttggtgtgtg  | aaagaaactg  | cctagatgag  | 34692417 |
| gttgtgggct  | gaatacagat  | tgtaacctag  | gaagtttgtg  | ggagtaagga  | 34692467 |
| ggggaagtgc  | ctccgaagag  | aggtcttccg  | ggagaatatg  | agattagttg  | 34692517 |
| aggttcaccg  | aatccctttg  | ttgcttaatt  | gagaggcata  | tttggagggg  | 34692567 |

|             |            |             |             |             |          |
|-------------|------------|-------------|-------------|-------------|----------|
| taaacctctc  | atgtagagct | gagcatccca  | gccttgttgc  | catagtaaca  | 34692617 |
| gtactcagac  | aggcccaaaa | cccagaaaac  | accagggtcta | agggattctg  | 34692667 |
| ttgaagccat  | ggttgttcct | tagaggtccc  | cactattgta  | ttctactagg  | 34692717 |
| cagaggcgca  | aaggctttga | atagctccct  | tccttcctct  | ttctagccat  | 34692767 |
| gggcttattg  | ctttgttttc | ttttctcctc  | ggactgagag  | gcctctcaaa  | 34692817 |
| atgggtacct  | ccctgcagat | ggagctaatac | gatattttaa  | agaagcacct  | 34692867 |
| ttctcaggct  | cgtttctttt | ctggctttct  | agaacttagc  | agaatctcca  | 34692917 |
| gcaccaacca  | tctttccccc | attgcagtca  | gaacacgaac  | ctgtttgag   | 34692967 |
| tgagctatat  | catcccttgc | agtaagcact  | catttcgctg  | tttcttggcc  | 34693017 |
| cgtatctctt  | tgggcatggc | tatccttctc  | acctcatagg  | ggaaagggta  | 34693067 |
| aaagagccct  | tatattgaag | ctaacttgta  | gggcctggtt  | acttatcatg  | 34693117 |
| gtcactaagt  | tcacctggat | tccttaaact  | gcactccagt  | ttacaaagat  | 34693167 |
| ttgttaagag  | acagttgctc | cttccagctc  | ggcttaattg  | attctagcat  | 34693217 |
| gatcatcatc  | tgtgtggcct | ttctatgcta  | acagtctggt  | ttctagactt  | 34693267 |
| gaacctgttt  | taactcaaga | actcctgaga  | ctgaattgtc  | aaaagtaggg  | 34693317 |
| tggcgaggca  | tgtttttatt | tcgtcagtac  | tcttggatct  | tggtagcttc  | 34693367 |
| ctgacaattc  | atgtcccata | ggacttaaca  | gcatactcca  | agtacctcca  | 34693417 |
| accctctttg  | ctcagtatca | gagtggtgaa  | caccggccat  | agcaaggata  | 34693467 |
| actgcattct  | gggaatcagc | taaactctgta | ttagacatgg  | tcctgcccgt  | 34693517 |
| ggacacttgc  | agcccagtga | cagagtggct  | ctaaagtgta  | aactcttcca  | 34693567 |
| cagaggggtcc | tttgtgctct | gttttttttag | ataaggaatc  | ccggcgtcta  | 34693617 |
| ccacagtggt  | aattagcact | tattagattc  | tgctaataaa  | tatgtaataa  | 34693667 |
| aatgtactg   | agtaaataaa | tgagtgtata  | aatgtgcac   | atataaggtc  | 34693717 |
| aatggggag   | aagactggac | aggggacact  | ggacagggga  | gctgcttaga  | 34693767 |
| ggtgaaatat  | tggtagagga | aagcaacaga  | atgagttgaa  | attggttggg  | 34693817 |
| tgttagaatt  | tgttgagatt | tccattggtg  | ccttttgtag  | gcttgtcttt  | 34693867 |
| tttttttcca  | ttttttatta | ggtatttagc  | tcatttacat  | ttccaatgct  | 34693917 |
| ataccaaaag  | tccccatat  | ccaccacacc  | ccacaccct   | gcccaccac   | 34693967 |
| taggcttgtc  | tttgaaaaca | ttttctggtg  | gaaaataata  | atgtatattt  | 34694017 |
| taatcatcaa  | ggaaccacag | gattctatac  | atgtctgtta  | gatcaagctt  | 34694067 |
| ttatgctcat  | aataagaagt | ttgtgttttc  | acctaagtaa  | ttgcaaggct  | 34694117 |
| gagctgattc  | caagatagtt | tgttgttatt  | ttgttattgg  | ggctacagcg  | 34694167 |
| cctgagatac  | tgtttttaa  | atcaatgcca  | gtgctatgat  | ttacactttt  | 34694217 |
| ctttcttatt  | tatttattta | tttatttatt  | tatttattta  | tttattcatt  | 34694267 |
| cattcattca  | tttattttat | atctcagctg  | tagccccct   | ccctcttctc  | 34694317 |
| ctctcagacc  | ctccgttaca | aatcccttcc  | cctctgagga  | gaaggggaag  | 34694367 |
| ccactcttgg  | gtaccacctt | gtcctgggat  | atcaagtcac  | agcacgacta  | 34694417 |
| aatgcatcct  | ctcccactga | gacccaacca  | gtcaatctag  | ctactagaag  | 34694467 |
| tggactccaa  | tggcaggcaa | gagtcagaga  | tagctcccgc  | tccagttggt  | 34694517 |
| tgaggacca   | aattaagacc | aagctgcaca  | tctgctacaa  | atgcttaggg  | 34694567 |
| ggcctaggtc  | cagccccaac | atgctctttg  | attggtgatt  | cagtctttgt  | 34694617 |
| gagcagccat  | gggccaagt  | tagttgacac  | tataggtctt  | cttgtactct  | 34694667 |
| ccatgaccct  | tctgctcaa  | gcctatccct  | cactcttcca  | tatgattctc  | 34694717 |
| tgagctctac  | ttgatgcttg | gatgtgggct  | tttgcactctg | tttccctcag  | 34694767 |
| ctactgcatg  | aagcttctca | ggagacagtt  | atgctaggct  | tctgtctata  | 34694817 |
| agcacagcag  | agtaccatta | atagtgtcag  | gggttgattc  | tctcctatgg  | 34694867 |
| gatgggtatc  | atttacattt | ttatctaagt  | ctggttatca  | tcatgtagag  | 34694917 |
| tgtctctttt  | ccgattaact | atatgttaaa  | atctattttg  | tttaataatta | 34694967 |

|            |            |            |             |            |          |
|------------|------------|------------|-------------|------------|----------|
| atttagctct | ttaatgggta | gtttttgccc | tacatagttt  | cccagttatt | 34695017 |
| tcttttaaat | gtctttgtgt | gttttagctt | tatattctgg  | agaacatata | 34695067 |
| gttagaatat | gtaggataaa | tagctagata | ttattatcta  | ttataatttg | 34695117 |
| ccttttaaat | gataggtttg | gtctactatt | gtgatttgta  | atatagttgg | 34695167 |
| agttgggatg | gcatgagttt | atgtagatgg | aagaattggt  | ggtgatcatc | 34695217 |
| ataggaaaca | atgtagtata | accttgtacc | agaaggtacc  | aaaaattttt | 34695267 |
| cagtttttcc | atcactgcct | aatcaataat | tagatgatct  | acaagtttta | 34695317 |
| acccttaact | tgatacaacc | tagaatcact | agaaaagtct  | caactcagct | 34695367 |
| attatctaga | tcagattggg | ctgtagacat | gtctttgaaa  | gattgtattg | 34695417 |
| attatttatt | gaccatttga | cccagtccat | tgtgggcaga  | atcatcccct | 34695467 |
| aggctgggcc | ctaaactgta | gaagagtgaa | tacatctttc  | taggcatcaa | 34695517 |
| gcagacaaca | tggatgcatt | cttttctctt | gttcttgatt  | tttcccaaaa | 34695567 |
| tgttgggtta | tagcctggaa | ttgtaagtta | agataaactt  | ctccctacat | 34695617 |
| ttgcttttga | tcaggaactt | ttatcacagt | aaatataaac  | agaaaagtaa | 34695667 |
| ctaaatccaa | tgacatatac | tgacttttat | cttattagcc  | tctgagaagc | 34695717 |
| aatgttatat | cttcttgatg | gtgttcagtc | ttcttgacca  | gaagcattct | 34695767 |
| aactatttag | gtggtattta | accagatcaa | ggtgggttgca | ggaggttaaa | 34695817 |
| agggagtgga | aagaaaattg | tggcaggagg | tgttagtgac  | tcactgaaag | 34695867 |
| gaaggttaga | aataggggtg | aaagagcagt | aggtctttaa  | tcatggatct | 34695917 |
| tcaagagaca | agtcaggagg | cagagagaga | aatgaacaga  | aaagatattg | 34695967 |
| ttgaatataa | atgcagaagg | actaagctgt | cacttagctt  | cttttgagta | 34696017 |
| atgcagaaat | gtttgtgtgt | aattgtgata | tagtttagaa  | atgtgtacac | 34696067 |
| atcacctttg | tggtagcaac | aatcaccttt | aatcccagca  | ttcaggaggc | 34696117 |
| agagacaggt | ggatctctgt | gagatccagc | ctgatctaca  | gagagaattc | 34696167 |
| caggacagcc | agaactgtgc | agagaaactc | tgtctcaaaa  | catgctcccc | 34696217 |
| tcaaagaata | tgtacacatc | tctgcttatt | tactaatgta  | aagatagtgt | 34696267 |
| catggttttt | aaatgtaaat | taatttcaca | cccttacttg  | ccattttgtc | 34696317 |
| aacattcatt | aagccaactg | gattttcttt | tcctacactt  | ccttagcatt | 34696367 |
| aagaacttga | tgccctacag | tgtccccaac | agatcttgtc  | cagggccttt | 34696417 |
| aaaattcatt | ttaagagtcc | accactctaa | atgggaaaca  | attgcaaggg | 34696467 |
| cccagagatc | tgataatttg | aagtattttc | ttcagttgag  | ttctgccatc | 34696517 |
| gtgtgaccag | ttctttctta | cctgcagtca | gtactttgct  | acagctctgt | 34696567 |
| cacatggctg | atgtctctcc | catgtatctt | tgttaaaagt  | ctctggatcc | 34696617 |
| ttcatgatgc | ttgtgtgatt | cagacatgtc | ttcccagggt  | tctttgtttc | 34696667 |
| attgttgttt | gttgtgtatt | ctggctagag | caattaaacc  | atgaatagaa | 34696717 |
| attcaattat | gttagatttt | tggggagagg | tttgtccaat  | aaatctatca | 34696767 |
| cgtgctagta | gtccctgact | ttacagtgat | ttgacttagg  | aactcttgac | 34696817 |
| tttatcatta | tgtaaaagga | atacattttt | agtttaaac   | atagctaaaa | 34696867 |
| tttgaatggt | atgttttata | ttttcaattt | atgattggac  | aatcaagag  | 34696917 |
| gcaactttac | atttttatgc | agatttccaa | atgttgaatc  | aggcttatgt | 34696967 |
| ttctaggata | aatcttacct | ggcaatgatg | tatttttata  | ttgcagagtt | 34697017 |
| tagtttgcta | atattttgag | tacatattta | taatttaatt  | tatatatcca | 34697067 |
| tgaagaatag | tagtctgtag | ttttgtttgt | tagactttgt  | taaacadcta | 34697117 |
| tatgtctatc | tgtctatcca | tccattcatc | catccacca   | tccatccatc | 34697167 |
| tttctatcca | tccatccaac | cacccatcca | tccatcatct  | atccatccat | 34697217 |
| catccatcca | tccatccatc | catccatcca | tccatccatc  | catctatcca | 34697267 |
| tccatccatc | atacttctgt | ctgtccatcc | atcatccatc  | catcaactat | 34697317 |
| ccatcataca | tgtgtttgtg | tgcatgcctg | tgttatggca  | cccgtgtgaa | 34697367 |

|             |             |             |             |             |          |
|-------------|-------------|-------------|-------------|-------------|----------|
| tgtcagggga  | caaccttcag  | gagtcagttc  | tctcctttca  | ttgtgtgagt  | 34697417 |
| tctggggatc  | aaacttgggt  | aattagattc  | agcaatagcc  | ctataaccta  | 34697467 |
| tgacaaaagc  | ttgtcagcca  | tgatcctttc  | tttcttactc  | atgtccttcat | 34697517 |
| ctgattttca  | tatcaagtaa  | tgttgggtctt | gtgacatttc  | tttagttcag  | 34697567 |
| attatatact  | taatcagtgt  | gactccttgac | agttttgtatt | ttttaaagaa  | 34697617 |
| at ttgtctgt | tttatctttt  | gacaaattgt  | gggcatatag  | tcgttcataa  | 34697667 |
| tatataaggc  | accaaattccc | tcatgactat  | atgctcaagg  | tccatgggtga | 34697717 |
| gtcaaaaaat  | attaaatgag  | aaattttta   | tagttacatc  | tttaaacagc  | 34697767 |
| atgggtgaagt | tttatggcat  | cttgctctgt  | ccttttgttc  | agagtaacca  | 34697817 |
| cgttcaagcc  | aatctgccta  | ccagttactt  | agtgattatt  | taaattatca  | 34697867 |
| tgtacatatc  | atgtatatac  | agttgtattg  | gggtgtttgtg | ttctagtaac  | 34697917 |
| ctataattta  | gttaaggatg  | atcttaaaat  | gtgaaattat  | tgttactata  | 34697967 |
| ctacattggt  | tttctgctg   | tactattttgt | agttgttaat  | ctcttatttt  | 34698017 |
| gcctaatttg  | taaattatgc  | tttgtcatat  | aattgcatat  | gtataaaaaa  | 34698067 |
| agtatataca  | aagcctgttt  | tcagacatcc  | acttgagggt  | aactaaagga  | 34698117 |
| agactagtct  | gcctttcagt  | atctgtagga  | tctgtggtag  | tggtctttgc  | 34698167 |
| ttcattcctg  | agattttag   | cttttgttat  | ctgttttccc  | tgaccagtgt  | 34698217 |
| gcctgcacac  | tcatcaactt  | tattgatctt  | ttcataaatt  | aaactttgggt | 34698267 |
| tctattcatg  | ctatttcctt  | tttttccaat  | tttattgatt  | tctgccttta  | 34698317 |
| ttattacctt  | tcttctgatg  | aatttgaatt  | taatttggct  | ttattctggt  | 34698367 |
| tttctaaagt  | gaaagcttag  | cccaccgatt  | tgagactttt  | tcttactgg   | 34698417 |
| tataattatt  | taatactaca  | tttaataata  | agatttcttt  | ttaggctctt  | 34698467 |
| gcaaccctca  | cattcacttt  | gagggttttg  | ttcttgggtt  | tgttttttgt  | 34698517 |
| tttgtttgggt | ttttgagata  | ggatttatgt  | agttcagact  | ggcctcatat  | 34698567 |
| tcatagtcct  | cctggttcag  | cttctggagt  | gcgaggttac  | gcatatgcac  | 34698617 |
| caccatgcac  | agccaaactg  | aaatattttc  | taaaatttct  | atgacttctt  | 34698667 |
| tagaaccatg  | gttccttaga  | agtatactct  | tgatctctta  | aatatacggt  | 34698717 |
| aaaaacattt  | cagatatgct  | cctgttgacc  | ctgctgggtt  | aatttcattt  | 34698767 |
| ttctcagaga  | ccattcctaa  | gttacacctc  | tttttttccc  | ttttagtttg  | 34698817 |
| atcaggtttt  | gtttgggtggc | ccagaatctg  | ggtttaactga | tgaacgttac  | 34698867 |
| acgtgtacta  | gggaagaatg  | tgattttgggt | gtctgtggat  | ggagaatccg  | 34698917 |
| gccatttggg  | ttggaatgggt | gagcagctca  | tctggccctc  | ccttgtcttc  | 34698967 |
| tgtatcctgg  | agccttcaat  | tatagcagtg  | gagtttccta  | gctctacctt  | 34699017 |
| tagttttaag  | agttttggga  | taaagtactt  | tagaagtcca  | tgttaaactt  | 34699067 |
| ctgcatgtta  | ttctctctcc  | agtgaactga  | ctgactgtga  | agtgattgcc  | 34699117 |
| tttactccta  | gcagtgttcc  | atcttctgac  | tcctttgtct  | ggaatcaatg  | 34699167 |
| tagccatttc  | tgctttatatt | aaaaagtgct  | tgcattttta  | gccctcaaag  | 34699217 |
| aaggctttat  | tgtagatagt  | atataattgg  | gtctttcttt  | gttgttccat  | 34699267 |
| ttttagttct  | ttagttttat  | ttaatgaaat  | tatttttatt  | taataaaatt  | 34699317 |
| attaatatgg  | ctgtaataaa  | acatgtcagc  | tttatttatt  | tatttaattt  | 34699367 |
| ctttgctttt  | atcttttttc  | taactactgt  | aatattgagt  | tttattgttt  | 34699417 |
| cactttatca  | ccagcatttt  | ccatttctta  | gattatttat  | tatgtgtatg  | 34699467 |
| agtacacaat  | agatattttc  | agacagacca  | gaagagggca  | tcagatcgca  | 34699517 |
| ttatagatgg  | ttgtgagcca  | ctgtgtgggt  | gctggaaatt  | gaactcagga  | 34699567 |
| cctttggaag  | agcactcagt  | gctcttaatc  | actaagccat  | ctctccagcc  | 34699617 |
| cccattttct  | at ttcttatg | cttatttggga | atgcactgtt  | tgcttttagaa | 34699667 |
| catctgatac  | tatgctctag  | ctcttaaaaag | tttgttcttt  | tcctgttttt  | 34699717 |
| gtttgtttgt  | ttgttcttca  | gtggagagtg  | gagggcattt  | catgtagact  | 34699767 |

|            |             |             |             |            |          |
|------------|-------------|-------------|-------------|------------|----------|
| tatccacag  | gtcattgatt  | ctgactctct  | ggttgtg     | catgtgctag | 34699817 |
| ttagtctgct | gaaatggaat  | gtggactgct  | gattgcctgg  | gttggggttt | 34699867 |
| ggggaggtg  | ggagcagcag  | tgagtataga  | ctttcttct   | tagggatgag | 34699917 |
| ggtggtctga | aatttgtcaa  | ggagatgggtg | gccatagcag  | gaaaaccctt | 34699967 |
| ctgactcata | taaattatat  | ggcatgagaa  | tccttttcag  | taaaattatt | 34700017 |
| tatataat   | tttacttta   | actttaatgt  | tttacttttg  | tagggtagat | 34700067 |
| tggtaaaaa  | aataaataaa  | taaaaattaa  | aagctcagta  | gacatcagag | 34700117 |
| aggaaagaca | ccttcctgat  | ggagctgaag  | gaagtataag  | cagaagtaat | 34700167 |
| tttgaagaaa | aggttactgc  | agtagaactt  | ggtgcaagat  | tggatctggg | 34700217 |
| gtattttatt | ttgtgttata  | tacttgatta  | taagtgttgc  | aaactggccc | 34700267 |
| tatccagtgc | taagtgtttt  | atattttat   | tcacgttaca  | gcccattatc | 34700317 |
| agtttactct | ctcttcccag  | taccccctca  | tacagatcct  | cccccaattt | 34700367 |
| ctctctcatc | ttcccctcac  | acaccacacc  | acatccctcc  | gcagcacatc | 34700417 |
| aagtaactgt | agtactaggc  | acatcctctc  | ccactgaggc  | cagacaagac | 34700467 |
| atctgttata | tatgtgcagg  | gggccaaggt  | ccagcctgtg  | cttgcgtttt | 34700517 |
| ggttgtaaat | tcagtctttg  | ggggccctca  | agggttcagg  | ttagatgact | 34700567 |
| cttggctctc | ctgtggaggc  | tctgtcctct  | tgagctccct  | caattcttct | 34700617 |
| ttcaactatt | ccataagact  | tccggagagc  | tccatcta    | gtttggtgt  | 34700667 |
| gagtctctga | atgtgtttca  | attggctgct  | agggtggagc  | tctccgagga | 34700717 |
| cagttatggc | taggttctctg | tctgcaatcg  | taacagagca  | tcattaatag | 34700767 |
| tgccctatgg | atgggtctca  | atgtgggcca  | gtcattgggt  | ggctatttcc | 34700817 |
| tccatctctg | ctctatcttt  | gtcccgattg  | atctactgca  | catcttgtaa | 34700867 |
| gcaggacaca | ttctgggttg  | aagggttttg  | gggtgggttg  | gtgcctttat | 34700917 |
| ccctccacta | agagttcttc  | ctggctacag  | gattggccac  | tttaggatcc | 34700967 |
| atatctccca | ctgctaggag  | tctcagttag  | agtcacctcc  | attggtgccc | 34701017 |
| ccaggggact | ccctccatcc  | caggtctctg  | gcacatccta  | acaattacc  | 34701067 |
| cccagtagta | agtgttctta  | gtttgtgcca  | ttatcgttca  | tcaggtttta | 34701117 |
| actcttacag | ataaaatggt  | ctttcatagt  | tactgaactt  | aacagataaa | 34701167 |
| aatgtttcaa | gtcatgtcat  | tgctttgagt  | tttctctagt  | gtttaagctc | 34701217 |
| ctttctactt | ttgtcctggg  | gtacctgagt  | caccgagcac  | tagtcttatc | 34701267 |
| cagtaatgct | actttgtatt  | ttaatgggtct | ggctgaggct  | atccatgtta | 34701317 |
| ccttcctggt | atgaaacaac  | acacaatagg  | gcttgcccag  | tgttctgcaa | 34701367 |
| atggagacct | gaggctgtgc  | tctgtactca  | gggttctactg | aaaaccatg  | 34701417 |
| tgggtggcca | acagccttcc  | cttctctgca  | gggaagactc  | tcacagccc  | 34701467 |
| tgctggtgta | tgttctcaga  | cactcagaaa  | ctttctagg   | ggctctagat | 34701517 |
| atctctagta | tggcacaggc  | atatttctat  | attaactggg  | aaaaaaagca | 34701567 |
| atgtgtaaaa | cagtatatat  | aatatgctgt  | cattgatatg  | taagaaaatg | 34701617 |
| gagacaaaac | catgtcttct  | tttaccatct  | gtatctaaga  | gacgggtgct | 34701667 |
| atggctgact | ctggaagaca  | tgttgggtgt  | aggcacctgg  | gagtaggcgt | 34701717 |
| ggctatgtct | ccgggtgtga  | gctataacag  | tgcattagct  | attcaaagag | 34701767 |
| aatagctttg | cccccttct   | tcatttctta  | actcttgggc  | tttcaggacc | 34701817 |
| ttttccaggt | gcttctggtc  | atgtggctgc  | cacagacgcg  | tgaagacacc | 34701867 |
| ttcttctctc | tttgagtaca  | acagaacctt  | tgtagagaca  | aagccccacc | 34701917 |
| tgtaaagcac | ctcttggtggc | tggctgctaa  | atgaactcca  | gactttctag | 34701967 |
| accagtgggt | cttagattca  | gtgaatcaga  | agagcttgtt  | gatacacagg | 34702017 |
| ctctagcata | aacgttttag  | ttaagcaggt  | ctgaagtgga  | cctagaaatc | 34702067 |
| ttcaactgtc | acaggcaact  | gaccaggggtg | aggacctcgc  | taatctgaaa | 34702117 |
| tagcttctcc | ttctcatacg  | ttggaggata  | cttttggtgt  | cctagctgtg | 34702167 |



|             |            |             |             |            |          |
|-------------|------------|-------------|-------------|------------|----------|
| acctcatttt  | gatgtatgag | ggaatcaaaa  | ttaggatag   | catgttttct | 34702217 |
| ttccttgggc  | atgtctgtag | tccactgtta  | agctttctgt  | ctagccaata | 34702267 |
| gcacctgaca  | ggatccttcc | tcctcagata  | gacaatatat  | atgtacttta | 34702317 |
| ccaccagcag  | acggacacag | cagaaacctg  | gcacctgttc  | ctcccataca | 34702367 |
| ccctggagca  | gacattcttg | tggtcactgc  | tgtcaactcc  | cagtgaaggt | 34702417 |
| ttaattggtg  | cttaagaggg | atactagaag  | aggtccacta  | attgctgatt | 34702467 |
| tctttcccag  | tgcttctttg | cagggatgct  | tttagcatct  | taggcaagac | 34702517 |
| tgttctttat  | aatgaacttt | ctgtttaatg  | taggtaattg  | gatcttcttt | 34702567 |
| cctttgtcct  | caattcatta | agacaatcca  | tctcaccaca  | cattcaatgc | 34702617 |
| cctctgactc  | attgatcacc | agcctttcat  | cccttcccac  | caggatgggt | 34702667 |
| ggtgacggca  | gtacagtctt | ctgctcagaa  | ccatgaaat   | tgtattagca | 34702717 |
| tcctgacctc  | tgccccagta | cgaaagcaac  | gaacggcctt  | tgactgcact | 34702767 |
| ttagtatttc  | gatggtttct | taaaacagat  | gctgatatta  | aaagagacca | 34702817 |
| aatggtaaat  | gtttcttctt | gagtgctccag | tgggtgctcag | tctatggtga | 34702867 |
| tgtgtactct  | cgctctgtag | gaagccttta  | cgaattcagt  | tgggggggtg | 34702917 |
| gagtaggggg  | acatgttctc | tcatgcctct  | catcagcttt  | gctccagaaa | 34702967 |
| aagtgaactt  | tttttctttt | tggttgctcc  | caagtgtcat  | gaaacttggg | 34703017 |
| aatagatgga  | attattggca | gattgaaaag  | ttagcttaga  | atgagccttt | 34703067 |
| ctacacgtac  | tcttaaagtc | tcagtagctc  | cgtttcatgt  | tttcttgtga | 34703117 |
| cttcaagacc  | tttgaagaa  | ggaatatgaa  | gagtcctatg  | aacaggggag | 34703167 |
| tactaatgat  | tgtagccagg | agaggcttat  | tctaggcctg  | agagtgggag | 34703217 |
| tgatggaatg  | tccagggggc | tggccctgac  | tgggtctatc  | taaggtgtgg | 34703267 |
| tggctctgag  | aatagaggag | aggcatgggtg | agcttagagg  | cctctctagc | 34703317 |
| tggcagatca  | tggaaagtga | ctagagagga  | tgtggtacca  | gctccacacg | 34703367 |
| tgtggaaaga  | ggagctaaag | tcaaggaatt  | ctccgccagc  | agcagaagag | 34703417 |
| ctgagcttcc  | gctttgtctt | ccgtctgact  | tagcacagaa  | gagaagcaga | 34703467 |
| aatgcccata  | ctgactgtgt | ccacttggtc  | ttgtggccaa  | ataggacaaa | 34703517 |
| gttgggtgctt | cctgccagat | ggatggagta  | tccagccagg  | agaccgaggt | 34703567 |
| aggcccagcc  | attgcattcc | tctaagagcc  | cagttactca  | cagttcttta | 34703617 |
| gaatgtgcct  | caaagtagga | aggaagccat  | caactctgtg  | tgaaggagcc | 34703667 |
| ctctggggct  | cctttgtgct | tcattaaggg  | acctcacaag  | gatctttcat | 34703717 |
| tctgtagcct  | cctggcttcc | catatgccat  | gatgagagcc  | catttccctt | 34703767 |
| taggtttgcc  | cttcataaag | tagcatagct  | caggaaaggt  | agaaacaagc | 34703817 |
| tacagagggc  | aaaatccacg | aacctgcact  | ttgagagaaa  | tgggtcttct | 34703867 |
| aaaggcatta  | gtttcccgcg | taaaaatgta  | aaatttgctt  | ccagaaggag | 34703917 |
| caaaggtctc  | tgaagaaagg | agacgagaga  | cctttagtgt  | cctggacttg | 34703967 |
| atggagtggg  | tggactctgt | cggctgcctt  | gatgtgaatt  | ctagagaaac | 34704017 |
| aaagaacaga  | ggcccagtct | gtcagagggga | cacttgcctc  | tgaggccatt | 34704067 |
| cttcttccac  | actgtattat | tttcttttag  | ctctgtcagc  | cctttatccg | 34704117 |
| tggcagtgtc  | tctcaagcca | ggcctcagct  | taccagggca  | acttctccag | 34704167 |
| aagaccctgt  | catccatcta | taccttact   | gcctggaggt  | ggcaccctaa | 34704217 |
| gcccttctcc  | ctcaccctcg | tcagaaccaa  | agcccttctc  | cctcacctgt | 34704267 |
| gccagacccc  | tttccagctc | ttcatcctga  | ccagaatact  | gcccatcagt | 34704317 |
| cttccatggg  | gaagaaggct | cttcttggaa  | ctgtttgttt  | tgaactcaa  | 34704367 |
| gtttgtagca  | ccccttacta | tcacctgtga  | gacttcttgg  | agcacaaggt | 34704417 |
| aatgttctctg | gctgctctta | tactctttga  | catgtctgtc  | tctgattggg | 34704467 |
| ttgtctttcc  | tttctccttt | tttttctttt  | tcttctcccc  | accctctgtg | 34704517 |
| cttctgagct  | gcagttcaga | acattccctg  | gtacgtgcag  | ggccggaagc | 34704567 |

|             |             |             |             |            |          |
|-------------|-------------|-------------|-------------|------------|----------|
| agttctccag  | gcccttcct   | ggccctccta  | ccagttacca  | cagccgacca | 34704617 |
| cagagaaggc  | actggtgagt  | cagcagggct  | taagtactgc  | tgctgttgac | 34704667 |
| CATTCTGCCT  | CAGGATCCTG  | GAGAGCTGTA  | GAGGGGAAC   | CGTGTCTCTG | 34704717 |
| CCTGGGTTTC  | CAAGAGAGCC  | TTTATGTGAA  | AGCATGCTG   | GCCAGTTACC | 34704767 |
| TGGGAAGgtg  | agagtacaat  | gattttttta  | gaattacttg  | ttggccttgg | 34704817 |
| cttagccagt  | aaaaatntag  | agtcaatgag  | aagtgtcatt  | gggagcagcc | 34704867 |
| aggacaaaat  | ctgaaagggt  | ggaggggtgg  | ggagggggct  | tccagcttct | 34704917 |
| gctagagatt  | attcatgcat  | gagtcctgaa  | acttcccctc  | ccgactttcc | 34704967 |
| agggcacccc  | tctgatgaac  | tctgcccaat  | tttgaattct  | cttttgtctt | 34705017 |
| tgtagggagg  | cagacctcct  | tggtttggag  | gatatagtgg  | gaccctgtta | 34705067 |
| ctgagcctat  | aaccacagct  | ggttgtatgt  | cagtgagctg  | tttcaggttg | 34705117 |
| cctgagagaa  | cacacacaca  | cacacacaca  | cacacacaca  | cacacacaca | 34705167 |
| cagatcgcag  | atgtgctcgc  | cttctgttta  | tggagaaggc  | tcttgtagta | 34705217 |
| acagacacag  | agaaagcctg  | ttgaacacag  | atggtacctt  | ttgtggccag | 34705267 |
| ttgtacagta  | gcaaatattc  | tcaggtttca  | aaaccatggg  | tcctcctttg | 34705317 |
| gtattttgtg  | tatataacct  | gtgtcatgta  | catatataac  | tttctattgt | 34705367 |
| ttccacgggtg | agggagggtga | gttccccttg  | ccaccttagg  | ttctacctta | 34705417 |
| tttttgagac  | aagatctctt  | tctgaggggc  | tggcaagatg  | gctcagtggg | 34705467 |
| taagagcgcc  | gactgctctt  | ccgaaggctc  | tgagttcaaa  | tcccagcaac | 34705517 |
| cacatgggtg  | ctcacgacca  | gctgtaacga  | aatctgatgc  | ccttttctgg | 34705567 |
| agtatctgag  | gacagctaca  | gtgtacttac  | atataataaa  | taaataaatc | 34705617 |
| taaaaaaaaa  | aaaaaaaaaa  | aagatctctt  | tctgaccctg  | gagctccaca | 34705667 |
| ttctctctag  | actactagac  | tagctggcca  | tcaagtcca   | gagatcctcc | 34705717 |
| tatctctgct  | ttcccagagc  | tgggcttatg  | gtgcacaccc  | ctgggcctag | 34705767 |
| gtttgacatg  | ggtactgggg  | attgacctga  | ggctctgggg  | tttatgtagc | 34705817 |
| aagcacttta  | ctgactatag  | attgtaaatac | atgtcctcta  | gatagcaatc | 34705867 |
| aaacgggtccc | tgagaagttt  | ggaaagtcac  | gtcttcacct  | agggccagga | 34705917 |
| tgtcccaaat  | cccattcctt  | tgaccagtaa  | ccagagtcct  | acaggctcag | 34705967 |
| ttcccgggat  | tacaagctgc  | tgactgtgag  | gcaggggttc  | atcttcaatg | 34706017 |
| accttcagtg  | ttctctggga  | cctaactgcc  | taacaatagc  | acatcaaacc | 34706067 |
| gcagttgcaa  | atgcttcatt  | gttaattcct  | tttcttatgg  | cagcacacgt | 34706117 |
| atttttctag  | actttgttac  | ttgctaattc  | gtattttaat  | atggaattta | 34706167 |
| gttctatctc  | tttccgaggt  | aagcattttc  | tctgagctat  | tttgtagaga | 34706217 |
| gttaatgtgc  | tcctctgtag  | gtttcacatt  | gtcttgctct  | tttgtattgc | 34706267 |
| tccttacatt  | gagatttatg  | cagccagtg   | gttattcatc  | tgtggatggg | 34706317 |
| cctcttagta  | aattgctttc  | tcttgggctc  | gtgtctcagg  | aggctgcttg | 34706367 |
| ggacctttgc  | cattattgta  | accatcctgg  | agaaattccg  | tcctcttttc | 34706417 |
| caaaaaagaa  | tactaaaatg  | gcacgccttg  | atactcattc  | attcattcaa | 34706467 |
| gaagtcttcc  | ttgagtgaca  | agagcgtcaa  | atttctctgct | ctaatgtact | 34706517 |
| tttcatttag  | agggagaagt  | aggtagcaac  | tttaagggtgc | cgtggagaac | 34706567 |
| aaagtgagg   | gcgtgtgcat  | gctcgtttaa  | tgcctgatgg  | ccaagtagaa | 34706617 |
| cacatttttt  | atggagggga  | catataagca  | aagtggagag  | tgaaggaaaa | 34706667 |
| gcatgggtca  | tagggcatct  | ggatggagaa  | ctctgttcaa  | ggccaagagc | 34706717 |
| ttggcaacca  | caaagatcct  | ggggctggaa  | tgaattagg   | gtgattgaag | 34706767 |
| gagcagtgag  | ttggccagct  | aacagcaggg  | ggctaaagca  | gaatgtaaca | 34706817 |
| ggaagtgaat  | tttgaccgtg  | gttagggcat  | tgctatggga  | tatttacctg | 34706867 |
| tttctccaa   | gcctagggaa  | ctgtggcctc  | ccacaagctc  | ccttagcccc | 34706917 |
| tttggctgta  | tacatctgct  | ttgatttttc  | cttctcttcc  | ctcccactca | 34706967 |

E1\*

|             |             |            |            |            |          |
|-------------|-------------|------------|------------|------------|----------|
| gatagctggt  | gaaatcctgc  | cttgtagtaa | atagttaatc | tcaatagaat | 34707017 |
| ggcgggaggg  | ggggagggca  | ttattctgcc | ctttctttca | gttcccagat | 34707067 |
| aaaagacaca  | aaacttttgt  | atttataata | agcctttaat | cagcactaga | 34707117 |
| gctgggcaga  | tatccgtcct  | ctaagctatt | agtttctact | cccctatcta | 34707167 |
| taaccctgag  | ttataacttg  | ccatgtttca | cctgggcagc | tcttaactcc | 34707217 |
| agttgaccag  | ccctcatggc  | catgttttca | tgactcatct | accccatggc | 34707267 |
| ttctttctcct | ctctccaaca  | tcttctcccc | ctccttgtgt | acttctgcct | 34707317 |
| cagaccacaca | aaccaggag   | ccaaaacact | gcctacctct | cttctgcaca | 34707367 |
| gctacaggct  | gtaggtatct  | ttattcacca | atcaggggta | actgatctgg | 34707417 |
| ttacaaagta  | tcacttgggtg | tatgtgagga | tttctttatc | ccaggggctg | 34707467 |
| tataacacac  | agcagcagac  | caaacctcaa | catgcaggca | atggtaagga | 34707517 |
| ctttggattt  | tattctgtat  | atagtgaaca | gcccctgaag | atgctttgtg | 34707567 |
| gtgtgtggtg  | gtatctgact  | gctatttggg | agaggagtgg | aaagagaagc | 34707617 |
| agatgatggg  | ctctgcagtg  | gtctataagt | atcatgttgg | tggctgtaaa | 34707667 |
| gtggtcagat  | gaaggaccag  | ttgaagtaaa | ttctgggtaa | gaggcagggt | 34707717 |
| aaaaaaaaaa  | aatgctaga   | tctgagctca | gtgtcagggg | tgcagccttt | 34707767 |
| gcctggatgg  | aaaccaccac  | tggagaaaca | cctggctgga | gagtgggata | 34707817 |
| ttctgctggt  | tttttcttag  | ataaactagt | ggaggtatcc | tgcaggcttc | 34707867 |
| tggctgtgac  | attcagagat  | cagtggggag | tctgggaagt | gagaatagaa | 34707917 |
| aactgttgct  | tgtatataaa  | tatgtgattc | tggattacat | caccagga   | 34707967 |
| gtgagcacag  | cagccactta  | ggggccagga | agagaaagga | ggaggaaaag | 34708017 |
| aggagagtat  | cctagaaagc  | aagggcagaa | acgactgtca | gggaaagagg | 34708067 |
| agtgactggc  | tgtgtcagtg  | cactgatgtg | cttcacatct | ccatagcaac | 34708117 |
| cgccatggtg  | ccttccaggt  | gtgatcaggc | catgcctcct | ccattggact | 34708167 |
| agcaactcaa  | ggaggccagg  | gtggatctgg | tcttcttttt | atgcttgaag | 34708217 |
| ctactcaaga  | ctgtgacttg  | gttaaaaggc | aggtgatggg | gtctgcttgc | 34708267 |
| tccagccagt  | ggagattgaa  | ggtggacaag | gagaagcata | gtgctgggtc | 34708317 |
| ttagtactt   | ttctattcct  | tggcaatagc | aggtggcacc | ctctgctctc | 34708367 |
| cttatacgtg  | tgtaggcttc  | taacagtggg | tcccttaatg | ggttctcca  | 34708417 |
| caggtgttaa  | tagtcttgtg  | tacaactgtg | aagctgtgat | ttttttcccc | 34708467 |
| cttcatcagt  | aagcctagaa  | attgggattt | cttaatttgg | aatctcctga | 34708517 |
| agtatctgcc  | tatttgcagg  | gaaatgagca | tcaccaatgc | ttacagctag | 34708567 |
| acttttaaaa  | acttatcatt  | aatcctaagt | gatttttttt | aaccaatgat | 34708617 |
| aacacctacc  | taaagctccc  | aggagaggta | ggtccccttg | tctgtttcaa | 34708667 |
| tttaaccaag  | tcacagctct  | gttgtgtgag | accaaagtg  | acacttgttt | 34708717 |
| gcgctatcta  | cttggggaga  | agattggggg | tggggggcaa | ggaagacgtt | 34708767 |
| aagggatgtc  | ccgaggagaa  | ggggttgaat | ggcagagaag | acagaaggaa | 34708817 |
| caggaaagag  | cacacaggtg  | tcagactccc | aacttgacc  | aatgtggtt  | 34708867 |
| gtaaggctcc  | aaccttagga  | caggggatat | agaagaatca | taatgggcag | 34708917 |
| tttgaatgcc  | cattgcttga  | tgtagcctag | ggctccttac | tttctatgta | 34708967 |
| atcctgagtg  | tgctgaagaa  | gcacagagga | gagccctctt | tggcctcctt | 34709017 |
| tggagatacc  | tttctcataa  | ccatgagttc | agatccttat | agagagcaag | 34709067 |
| gcccaatggg  | acctgtgtcc  | aggaaggaa  | gatatgggag | tactttgggt | 34709117 |
| cagccgtgac  | ttcttccttt  | gacgattagt | atgtatccag | gggaatgcag | 34709167 |
| tgggcctgaa  | gatctggcca  | tttctgactg | gaagcagtac | ctagagtaga | 34709217 |
| acagccttaa  | agacctatgc  | cttggttggt | tcggaattga | tttaaccaa  | 34709267 |
| gatcacaac   | tgggtgattt  | atgaagaaca | gagatttatc | tcttacagtt | 34709317 |
| ctagaggctg  | gaagacaaag  | attaagaggt | cacattttgt | gaggacttcc | 34709367 |

|             |             |             |             |             |          |
|-------------|-------------|-------------|-------------|-------------|----------|
| cccctcccc   | cattgctaca  | taatctcacg  | gtagaacgtg  | ggtgggcaag  | 34709417 |
| agatcatgag  | actcaacagg  | tttcagccta  | cctttatggc  | aaaccaattt  | 34709467 |
| cmetaatctg  | agcctactcc  | tgtatgaatg  | ttgcttcata  | ccttaaagggt | 34709517 |
| cctccatctc  | aacattgaag  | tcaggattca  | gtttctaaca  | catgagcttt  | 34709567 |
| gggggacaca  | ctcaacaatt  | gaacccttca  | gaactgggca  | aagtatgagt  | 34709617 |
| taaattaaat  | atagtttctt  | tgcagctaag  | agaatgggat  | aaggtttggt  | 34709667 |
| tataattctt  | tctctcttcc  | atggatgtag  | ggagactaga  | ggactcggat  | 34709717 |
| aaatagtgag  | accgtagtac  | cataggaaag  | gacagcaata  | ctttctgatt  | 34709767 |
| gaaatgttta  | tgagtgtctt  | aaagagatgg  | aagcccatct  | cggcataagg  | 34709817 |
| agaccaccaa  | ttgagaatcc  | tgtataaaca  | aagaagacca  | ttgggtgtggg | 34709867 |
| ttaagggccc  | cctcagagtt  | caagctggta  | ataagctttt  | agcccaggggt | 34709917 |
| ccatcccctg  | gagttttcca  | tggaaactaa  | ttataaactt  | ttccagacaa  | 34709967 |
| tccttgatca  | tggggcctga  | taaagttcaa  | tcttactgct  | aaagctatgt  | 34710017 |
| caacattaa   | gctgtcttta  | ttcatttgct  | atccattaa   | gcatcacag   | 34710067 |
| attaattatt  | tttcaaaga   | aataaaacta  | tgctaaagtt  | gtgcatgtaa  | 34710117 |
| ctcatgacca  | gatgttgga   | gtcttgggct  | acccttccat  | gcttaaaaat  | 34710167 |
| actgcaagaa  | gtcttgaaac  | agtaaaatct  | gaaaatgaag  | ctaagccatt  | 34710217 |
| gaaaggatga  | gcatgagcaa  | aacctttcac  | ctcatgagtt  | ttactggatc  | 34710267 |
| atthttattc  | tgaacaagaa  | tcctaagtta  | taaattaata  | ctggatgctg  | 34710317 |
| agacctgcat  | gtaaccaatt  | ttgtagtgtg  | tgggaaagtc  | ggagggaaat  | 34710367 |
| caagaacata  | cgtgatgggg  | aaactgagaa  | tctctggtag  | cttagctgag  | 34710417 |
| tgtctcgaag  | ctcagcatcc  | acctgaatcg  | tcatctatga  | gtaggtgaca  | 34710467 |
| gggatgctga  | tggcaggagg  | caggggaggt  | gctcctgtcc  | cacgtctgaa  | 34710517 |
| ggagttgga   | agccactgac  | gatctgccac  | ctacagcctc  | ccactgagtg  | 34710567 |
| gtccagagcg  | tggaaattgt  | attgggaatt  | tcatagcatt  | gcctctgact  | 34710617 |
| ctaccctgcc  | tgcatgttcc  | tgggtgcttga | tgcaaggctg  | gcagtgtcca  | 34710667 |
| tgtttgtggg  | ctgttcttac  | ttctgcttga  | ctaccctagc  | tgggtgttgc  | 34710717 |
| tggccttcag  | ccatgtcata  | cccttaggac  | atgcaccctc  | ctctttttga  | 34710767 |
| gttatggggg  | ttgctgggat  | atgaggtttg  | tgagtgagaa  | tctagacttg  | 34710817 |
| gggggggggtc | tgtctgggtct | ggtaggagtg  | aaccaggggtg | acagacatct  | 34710867 |
| tcaacaagag  | aacttaaaac  | aagggacctt  | caaatggaaa  | aatcaagct   | 34710917 |
| tcctgaaaa   | aaaagcctca  | caggaacctc  | aatggaagt   | gtgggttaaa  | 34710967 |
| atcaagatga  | gaagcaacat  | gaataaataa  | ggggtttaaa  | gacctttgct  | 34711017 |
| taattattht  | ttttaaagca  | agttaaacat  | ggacaggatg  | tgatgggctt  | 34711067 |
| ggtgatattc  | taagataaag  | cctggagaaa  | ggaagttht   | tttgccacta  | 34711117 |
| tctthtctag  | aggttattht  | cagcaactat  | aaagagaatg  | agagttcacc  | 34711167 |
| tactgcaagc  | taaggagtta  | atctgccaag  | ttcatggtht  | ctggcaggag  | 34711217 |
| aggagacttg  | tgagttagag  | ataacgcact  | tcatgattaa  | caacaaaaac  | 34711267 |
| aactctaaca  | tcggcatttht | cttacactgg  | ttctthtgggc | tccaaccccc  | 34711317 |
| ataagttatt  | gcaagaagg   | cgatatcata  | gttgcactgt  | agtggcaggg  | 34711367 |
| atgggggacc  | cttgaagttht | ggatctthtcc | taggggcttg  | taagtacatt  | 34711417 |
| gtcactthtgc | tccgtcagag  | gctgagggga  | aagtctggat  | gcagcatcac  | 34711467 |
| ttccactctg  | gactthttht  | tgtacaagta  | ttcttaaaga  | gcgaggctgg  | 34711517 |
| aacaaaggct  | gtaagtgcct  | ctgtaggtat  | agaaccgtga  | gaccagggga  | 34711567 |
| gaagagtctc  | cccagcgtat  | caataataga  | aaaggagggc  | acgggagtg   | 34711617 |
| ttactgcacc  | cttgctgtgt  | aagcagtatc  | caccagagga  | catctggtct  | 34711667 |
| aaccactgtg  | tcgctgtgtt  | cattatctag  | tccccaggggt | catggtgtgt  | 34711717 |
| gtgcagatgc  | tgcgggagga  | aaccacgcac  | aagaggattc  | tttagtccga  | 34711767 |

|             |              |               |                |             |          |
|-------------|--------------|---------------|----------------|-------------|----------|
| gaaaggttaa  | gggtaaata    | cagctgtcct    | caaatagttg     | gaggaggccc  | 34711817 |
| cttcttgagg  | ggtagcattt   | acttttgtgg    | ctgcaggagg     | ccttcaccca  | 34711867 |
| gtgacagggg  | gacatcctgg   | ttcagtttaag   | taacagcctg     | tctcctgaca  | 34711917 |
| tggtatggga  | agtggggact   | tgcaaggccg    | gaacactctt     | tgtgcagggt  | 34711967 |
| tttcttggtc  | attcgtctat   | gttcggttgc    | cttagtgggg     | gtccatcaaa  | 34712017 |
| agccccacaa  | taaacaccgc   | tgcttctctc    | tagaggagct     | aggtgataga  | 34712067 |
| agaggtctaa  | atgatgtggt   | ccggaccatt    | tctagagctt     | tcctaagaga  | 34712117 |
| gttgatcctg  | ctaacacagt   | ggcgtgaact    | ctttgccctg     | ccatctgttg  | 34712167 |
| atggctctca  | tagacaggca   | gcctcctttg    | tgtctcactg     | ctgggatgtc  | 34712217 |
| ctgtccctgc  | tgcaagtgtc   | agaggagcta    | ttgtcagcta     | ggccttgggt  | 34712267 |
| gctgaggctc  | ctggtattct   | caggttgttc    | ttaggggacc     | ccaggatatt  | 34712317 |
| gaccaagtcc  | tatcttgctg   | agtttggggc    | catcccttct     | gccacctgaa  | 34712367 |
| ttccccatgc  | atagtccaga   | ccactgttgc    | ccagttagga     | aacacaggat  | 34712417 |
| tgctttgcag  | gggtgggggg   | ctaagttagg    | tctcctaact     | gtattctgtg  | 34712467 |
| gttctgtgac  | tcactcttcc   | cctgtcaaat    | ggcctgagct     | ctaaaagct   | 34712517 |
| cagtaacagg  | tggtggggcc   | tggtttctct    | gcaatgacct     | ggaaacccca  | 34712567 |
| caggattgga  | gtggctccag   | tcccagagctg   | agcattatca     | ggtctacctg  | 34712617 |
| caaagttaac  | aacaggccct   | ggagtgggtca   | agagaggagt     | ttggggctct  | 34712667 |
| gatgaggagc  | aggaaaggtg   | gcagctgact    | tcatggtatc     | tgctccactt  | 34712717 |
| agccagcacg  | gccctctggt   | gaaagggaaac   | ggctccccaa     | atgtggtcct  | 34712767 |
| aattagcttg  | tgcatthtct   | taaaagcatt    | catctttatc     | aaaggggttt  | 34712817 |
| aaaagtgct   | gcttagcctg   | gtgtaaaggg    | cactgtcgag     | agctgatcct  | 34712867 |
| gaagtaatgt  | ctctgctctc   | ccagatgcct    | ggaagagcta     | aaaatacaca  | 34712917 |
| tgtgactctg  | aggaattctt   | gggttttttg    | accatctctc     | tcctctttca  | 34712967 |
| acatccctca  | agaaagtgag   | agagagaagg    | aatgagccag     | aaagtcttaa  | 34713017 |
| ttatccagtc  | tgctgacatt   | gtttttatct    | gcgccactga     | tattaaatgt  | 34713067 |
| ggacagcatt  | ccatttaaat   | cacagtacca    | agaacgactt     | ctgcaaactt  | 34713117 |
| gggcctttat  | ccttttgctt   | gatgcggcca    | acgttcagtt     | ttccaccctg  | 34713167 |
| cctcgctccc  | cctcagactt   | ctgaaattcc    | acagcaccca     | atggaactgg  | 34713217 |
| aaattatctt  | tctagaatgt   | ccatccttag    | ggagagccct     | gaagctggct  | 34713267 |
| ctgttgctcc  | ctagtthtga   | tctcccaact    | gagcttgacc     | atthgtgctt  | 34713317 |
| gaattctcac  | gtgctcatcg   | ctggagccat    | ctggacttgg     | cagaaatctt  | 34713367 |
| ttgccatatt  | tccattattg   | gcagtcatgg    | aaaaggaaaa     | gcaatttatc  | 34713417 |
| tagthttht   | thtacctctt   | ttatgaatat    | thtctattata    | thtthtacctt | 34713467 |
| thtctaggca  | gtcaaatgca   | cattthagttg   | cagthtgggt     | thtctggctat | 34713517 |
| ggaactthtct | accttgthta   | atgctgtcag    | tcatacaaca     | gthtggthtat | 34713567 |
| ttacagtaga  | taactagggg   | thgtthtgcta   | gcacagctag     | acctatthca  | 34713617 |
| attaaggaaa  | thtthtctagtg | thtctaagcat   | ggtgctgcag     | gagthtcccc  | 34713667 |
| thtccagccac | ctgaagcaga   | ggatgggatg    | acatgthtca     | gacatgctat  | 34713717 |
| gagtgctctt  | aaatagthca   | ctctgattct    | gtagaatcaa     | tatgthtgggt | 34713767 |
| cctgtcctgc  | ccacctcagg   | gcacagaaac    | acagggagtt     | tgactgtgct  | 34713817 |
| thtcccacac  | tgctgccagg   | cgggtactgg    | gthtccagga     | agcaccaaga  | 34713867 |
| cagccctctg  | ggggtgtgag   | atgtgagaaa    | gccccatthtgg   | ggactgacac  | 34713917 |
| actgaggaca  | gcgtctatct   | cgggggtgagg   | ggtgggggagc    | thtctgcttag | 34713967 |
| ctcagcaggg  | atthtctctta  | gctthtgggtggc | agthtgtggct    | gggggcacag  | 34714017 |
| agaggtggga  | gaatcaagct   | gtgtcaagtg    | cctthtctccgt   | ggctccccac  | 34714067 |
| ggcagatctt  | gatgaaagag   | atagtccacg    | gthtctatacag   | tactgtagca  | 34714117 |
| actthtcaag  | ctggaccaga   | gattaaatac    | atthtthtctcagg | gaggaatgtc  | 34714167 |

|             |            |            |            |             |          |
|-------------|------------|------------|------------|-------------|----------|
| tgagaagggga | agcttattgg | ctaaaccttc | agagcctcta | ggtgtctcat  | 34714217 |
| taacgtagaa  | aactctgttc | tgggcctacc | tgaccacagg | tcacatttcc  | 34714267 |
| ttatgtggga  | gtgtggcatg | tgttccaggg | caggaatttg | acaggtagtg  | 34714317 |
| cagagtcgct  | taagtctcag | gtgtgtaccc | actgagtctc | tgggtctcag  | 34714367 |
| atctgctcta  | ccttaccaag | cttcctggca | tggtttacca | tcccacatca  | 34714417 |
| atatttaaag  | gttgtggggc | catgaagagg | tgggatccag | tggcaagatt  | 34714467 |
| ccaggacgag  | tcccttctta | ctctctggct | tctgatcctg | tgatgtggtc  | 34714517 |
| gctccctggt  | gtgtgcagtc | ttactatagt | gatgccact  | gccatgatgt  | 34714567 |
| cctcactaga  | gccagcatcc | tgctgtttag | atggtcagcc | tcaaaagaaa  | 34714617 |
| cctcattact  | tcataactac | acagcatgaa | gtattttgtt | ataattatgg  | 34714667 |
| aaaactgact  | acaccacttt | ccctgtctta | taactgaggg | caaagacca   | 34714717 |
| gagagattga  | agaatttgct | gaggtttcca | aagcagaggt | ccgattagga  | 34714767 |
| aaccaggtga  | tgtagtgtcc | gaataggttg | acttccatca | ctgttgcata  | 34714817 |
| tacctgcgca  | tgtgccataa | aaataaatga | cacagtacgg | tgggaacagt  | 34714867 |
| gccccagggc  | tcccagtggt | tatgtcttta | taaaacttca | tcaccagcag  | 34714917 |
| tgtgtatcaa  | gaccagagta | ccataaagtc | cagagatgta | caaaccaccag | 34714967 |
| cacagtccaa  | agtcttcagc | ctggaacca  | aaacacttgc | tctgaggacc  | 34715017 |
| agatcctgac  | taagcagggg | ttgctttgac | tttttgtcca | ctgctgtgtc  | 34715067 |
| tccagggacc  | agaataacac | agcaatgtgt | gagcactgca | aacacatata  | 34715117 |
| atgaaccagc  | aaagttgaaa | caaagtcatt | gccattgtta | tagggaaaca  | 34715167 |
| aaggacatta  | aaggacagtg | ttttcaggtg | atgcctgctt | atgaaccctg  | 34715217 |
| ctgtcttcct  | ttctttcact | tgtctagctg | agtggaagcc | tcctcaccag  | 34715267 |
| ggtccttggt  | gacccaagtc | ctagctaagc | attgagccgt | ttatgggtct  | 34715317 |
| tgctggagta  | gccttagagg | agacatgtac | cctgagatag | atggtgtagg  | 34715367 |
| catcggtggt  | gtggcccctg | ggaggcctcc | tggcactgtg | tccccagggc  | 34715417 |
| ggattccatg  | gaaaggcaga | ggcttccagt | ttcgcttgat | aacaacagtt  | 34715467 |
| gttttgaaca  | ttgcgaccct | tgagtctgga | tcctttcctg | tcttgctcaa  | 34715517 |
| tccctaactc  | attccccaa  | tcttacctaa | cttggttggg | tatctgtatg  | 34715567 |
| cacacctcct  | ttcacacttt | gtgggactcc | ccacacctgg | tccttaatct  | 34715617 |
| tgtactagtt  | caaggagacg | ttcaaaattt | ttcaaaaatt | ttgaaaaatg  | 34715667 |
| tcctgaggaa  | ataatctaga | agaaaagttt | tatgtctaaa | agtgacttaa  | 34715717 |
| agtgttgttt  | ttgtgaagtt | acaaataacc | ttagtgttaa | ataaaaagggg | 34715767 |
| cgtgattggg  | ggaagttaca | gtttatccat | ttgatgtgat | actgaaaata  | 34715817 |
| agatttgtga  | agagtactct | gtatccagga | ataaatctat | agttgagtta  | 34715867 |
| gaagaaaatg  | ttgaaaagga | ggctataatc | atgtatatgt | atcattttgt  | 34715917 |
| atgtgtgtgt  | gtatatgtat | atatgtgtat | atatataact | atactaggta  | 34715967 |
| ggttttttat  | ttttttggtc | aatatgacac | aagctagggg | catctgggga  | 34716017 |
| aaggggagtc  | tcagttcaga | aaatggctcc | ctcagactgg | ctggtagaca  | 34716067 |
| agcctgaaga  | acattttctt | gagtaatgat | tggagggcac | agaccactgt  | 34716117 |
| ggacagggcc  | agccctgggc | agattgtctt | gggttgggtg | tataagacag  | 34716167 |
| cacgctgaga  | aagccatgga | aagcaagcaa | gtatgcaaca | aaggaaatgt  | 34716217 |
| tggaggatct  | tggatgtgca | tgaccgaatg | aacagagaag | ctaagcctca  | 34716267 |
| tgacctcagg  | gtcatggggc | caacctagac | ggaagtccac | agacaccag   | 34716317 |
| cctcagtgaa  | caccagccga | gaccaaacct | gcttgtgtcc | aacagggagg  | 34716367 |
| tgtctactga  | acttttcatc | cagagcgtag | ccacttcagt | ggagaagggg  | 34716417 |
| caggatgggg  | cagctgtcag | agtgtttcca | gagaccacgg | gaaggaagga  | 34716467 |
| aagttgggca  | agataaagtg | ggctgttaag | ggggcatcct | ggcttttctt  | 34716517 |
| gacactctca  | tgtcactatg | gggaggaagg | agtatctgcc | atgttctctt  | 34716567 |

|             |            |              |             |             |          |
|-------------|------------|--------------|-------------|-------------|----------|
| tactctctca  | tcttgtttgt | gctcaacaag   | ggccttgaag  | gtactcacta  | 34716617 |
| aatgcatgag  | tactctgtgt | ggacaaatgt   | cacctcaggc  | ccttgttctc  | 34716667 |
| ccttctatat  | agaaagaaca | gacctaatag   | gtcagtctct  | gttggcccca  | 34716717 |
| aagaacagtg  | tatagacaac | tctaagtggg   | aaaggagaga  | gtacatatta  | 34716767 |
| gctagctagc  | tctttttgag | gcctctagat   | aacaccagtg  | gcctaagcag  | 34716817 |
| ttggatctga  | aaagagtcct | ttggaggcaa   | atgacaggaa  | ttaatgaagt  | 34716867 |
| tctggcacct  | ttgtgtcgaa | gggtgtgatg   | cttgtggctg  | gctgctgttt  | 34716917 |
| gcatgtgttc  | ctgccagag  | taccaagtga   | agctggtcac  | cagcagagtg  | 34716967 |
| ataagtagtc  | tctgaagttc | agtgcctggc   | atggtcaccc  | tgttgccctc  | 34717017 |
| catgctgctg  | cgtggtaaga | ggaagaagag   | aacgtgagct  | gccttctgca  | 34717067 |
| gagcagagct  | ccttccaggg | ctggggctca   | cactgtgctc  | gtacatcctt  | 34717117 |
| ggggacacat  | tagagattca | accttgtgtc   | aggactcttc  | ttcatattct  | 34717167 |
| gtccttggaa  | cttgggaccc | tggccttgtt   | agccccttcc  | ctttaggtct  | 34717217 |
| tgtttttctc  | gtcatagact | aagaatgtga   | ggcaagagtc  | tttgaggat   | 34717267 |
| aaggctgtat  | gtagtctagt | tggaaccagg   | tcaaaacagt  | aggacctttg  | 34717317 |
| agctcagtca  | attcgcagct | gttccttaca   | gcatctctaa  | caatatgaca  | 34717367 |
| ttgctaccag  | gggtctgaat | caggacacct   | gagtcacagac | ttagctgatg  | 34717417 |
| ttagtagctg  | gtacttattg | gctttggaat   | ttgtgctatc  | ctgaaatctg  | 34717467 |
| aaagaattgc  | tttgaaaatg | gaagtcaatt   | taggctaaaa  | gccatcaata  | 34717517 |
| tagagctagc  | tcccaggatg | gaactaacca   | aagagttact  | tctatcacag  | 34717567 |
| caacacaaac  | tgtggtttca | ctgggtctgca  | ccttgggttt  | cttttctaca  | 34717617 |
| gcgcaggaag  | gttggcttgg | tccagagctt   | ctcaaagctg  | tcaccctcag  | 34717667 |
| gagcaacagt  | ggaagaacgt | gtgctctgca   | gtaggacttg  | agttgtagcc  | 34717717 |
| tcaagtaaca  | ttagcattaa | ctaattaact   | aattagctta  | gcattgagat  | 34717767 |
| agaaacatgc  | tttatgagtt | gccagactat   | tcacaggtgg  | tattctataa  | 34717817 |
| aataagctta  | ttttaatatt | aaaaaaaaatcc | cctaaatctc  | tgggatgaat  | 34717867 |
| gttctagaat  | gaggtgacct | tacatagtcc   | ttctgtagtc  | ctacagatag  | 34717917 |
| agatgtgggt  | gtgtagcttg | gaaggctcct   | cctggattac  | tcttgcttcc  | 34717967 |
| tagggcacat  | gagtctcctc | caaaggctctg  | agataggtgc  | taaagaatcc  | 34718017 |
| ttaaggcacc  | tcaaagcagc | cagcccccca   | tgtccctgtc  | ccaggtagge  | 34718067 |
| tggatctagg  | ctgaagctga | accaaccaa    | agaggaaatc  | gagagcacac  | 34718117 |
| agggccagag  | taggagcctg | tgtctgaacc   | tgacattctg  | cccttggact  | 34718167 |
| gatgaagcta  | gcttgctggc | aggcttcacc   | accgtaggta  | aatcccagca  | 34718217 |
| gacactaagc  | cattgtttcg | catectcact   | gaaggctgtg  | gtacacacag  | 34718267 |
| aaaaggctga  | gcagcttgtg | gaagtgtagg   | gcttgacaca  | atgtcatagc  | 34718317 |
| atactcctca  | agctttgaag | aaatactgga   | ggccaaggtc  | agcactgaac  | 34718367 |
| ttttgcccag  | cagtagaagg | agcaaggaag   | gggcccagat  | caacatagca  | 34718417 |
| aagctttggg  | gagagcaaag | atgtccctag   | ctgtggtctg  | agaacgtgtg  | 34718467 |
| tgtgtgtgtg  | tgtgtgtgtg | tgtgtgtgtg   | tgtgtgtgtg  | tgactgatgg  | 34718517 |
| cagggctcagc | ttctggggac | ttctggggac   | tggccactgg  | gcatgtgtgg  | 34718567 |
| tctctgcctg  | aggatgaag  | ggtttaaagt   | aagtcactca  | tgtgttttagg | 34718617 |
| acaaatattg  | ggaacattta | ccttggcaga   | gggtattagt  | caaatttata  | 34718667 |
| ctcattagat  | atcataacaa | tatctaatag   | aatatcaaca  | aatactgaaa  | 34718717 |
| gttttctgct  | gtcgtgggtg | ttgttataat   | aagagttcag  | accaagtatg  | 34718767 |
| gtgtggctca  | tgctgaaat  | cccagcactc   | ttgaggcaag  | agaattgcct  | 34718817 |
| caagttcaag  | gctaacctgg | gctagagtgg   | gagacaccaa  | agtgggggcg  | 34718867 |
| gggaaggttt  | aatatatctt | tccagtcctt   | ctaaacaagt  | taccaaactg  | 34718917 |
| aaccaggatt  | tggagttgag | aaagcctcga   | tttcagttct  | gttttattac  | 34718967 |

|            |             |             |            |             |          |
|------------|-------------|-------------|------------|-------------|----------|
| tatatggccc | taaccagtgt  | ttattgagtc  | tattgcctgc | atcgggtgta  | 34719017 |
| actgaaatga | aatatccgag  | acaggctgac  | ttcattaaga | agcttattcg  | 34719067 |
| tctcacagtt | ctggagggtg  | cttcaacttc  | ctgggagagc | tcaacagtg   | 34719117 |
| gtgttgccc  | agggtgaacg  | acaagaatgc  | caccgcgatt | ggggaatcct  | 34719167 |
| gctcagtctt | gtaaggactt  | gtgcttgta   | gagcccagg  | gtcccaggag  | 34719217 |
| gatccccctt | cgttccctcc  | ctagagctac  | ttttctcagt | gacttagact  | 34719267 |
| ctaccactta | acgggtcccac | tttctctcaa  | cattgacacc | caagggttta  | 34719317 |
| aagctcccac | tatgtgaagt  | ttgggggagc  | acactcaaac | tgtggcatga  | 34719367 |
| ccttaggcaa | acctcttggt  | acttagggct  | catatttccc | atcgacaaaa  | 34719417 |
| tgaagataaa | atattttaat  | acgtttgtgaa | cctcaagtgc | gaagtccttt  | 34719467 |
| ttctctaaga | atgacatttg  | ttcaatgagt  | tagcgttatc | cacctcataa  | 34719517 |
| ctctaagaac | aatatatgag  | gcagctttgt  | gacaagttta | ttgaaacact  | 34719567 |
| catttcaggt | atctcgttcg  | gagtggaaca  | cactgtcatt | cattgaatat  | 34719617 |
| gcagtgctaa | caacatgaaa  | tgagatttca  | ttgggaaagc | tttttgcaag  | 34719667 |
| tcattaaagc | agtagttagc  | cttaaataaa  | acctcttcag | tagcattagc  | 34719717 |
| aaagagcaca | gttctccctg  | gggccctcca  | catctagtct | cagtcagctt  | 34719767 |
| gatgactatg | tctgtcaaaa  | ctcctttttg  | cctatccttt | gccagggtgag | 34719817 |
| tttggtgctt | tacatataca  | accctggct   | cagctctgtg | tagacttacc  | 34719867 |
| cacttgggtt | gcaatgccct  | gttctctagg  | acttctaaaa | gtcattcatt  | 34719917 |
| ctcacctcag | gcttggcctt  | cttttccttg  | cctgtaaaat | cagcaattct  | 34719967 |
| gcatctttgg | ttcttcagta  | ctggcccctt  | catgcattcc | agcagttcat  | 34720017 |
| agatgaggta | gatgttggtg  | gggctaacc   | aaagtcctgg | atctgggcct  | 34720067 |
| gcatggtagc | tgagttggtg  | tgctcaccag  | ctctcctgca | tttcccag    | 34720117 |
| ggagggtggg | gtggggtaga  | aagtgtgtgt  | gtgtgtgtgt | gtgtgtgtgt  | 34720167 |
| ctgtgtgtgt | gtgtgtgtct  | gtgtgtctgt  | gcgtctgtgt | gtctgtgtgt  | 34720217 |
| ctttgtcaag | ggggcagttc  | acccaagtgc  | tgcaggagga | gaggggtgag  | 34720267 |
| catctctcct | gcactcatgc  | cctcagggtc  | atctcttcca | cactggccag  | 34720317 |
| gagaggggtc | aggccagctc  | tctgcctgc   | ctcatgcagc | taggagcagg  | 34720367 |
| ctgagtatct | ctattgtgcc  | cataccactg  | catggctgg  | gagaggcagg  | 34720417 |
| gttagctctc | ctatgctcaa  | gccctcaggc  | tggctcaact | gtgtccctgc  | 34720467 |
| ctaggtgagg | tgtggcctac  | tccgctcaac  | ccagatcagg | actaccagta  | 34720517 |
| tggcctttgg | gggtagcatg  | ggttatagaa  | ctgacagagc | acagacagag  | 34720567 |
| acttcatcat | ggcctcaggt  | ggcagggcag  | gatgctcaca | tcaggctggt  | 34720617 |
| cccaaccact | gtcctatccc  | cagttctcct  | tctcttcata | gtgagcaaac  | 34720667 |
| atctccttct | ctgtctctcc  | catctcacca  | tgatacactt | gctctttata  | 34720717 |
| tagtggcgcc | tgcgcatact  | gcaccgcag   | tggcatcttt | tgaaaggtaa  | 34720767 |
| gatggttaaa | tgtttgtcca  | accagagat   | tttgaaggaa | gtaaatecca  | 34720817 |
| gccttgtggt | tgaactgcc   | ctacaacca   | ctagagagct | gagcagatag  | 34720867 |
| gccagtgagg | agaagtaaac  | agcaggatat  | gtcagcagct | gtgggtctcc  | 34720917 |
| actctgcagg | gcctgcttgt  | cttctggggc  | aagtatgcca | ccctgagagt  | 34720967 |
| cacagcaact | cacacagtg   | tcattttccc  | aaaggaaact | tgtggttgtt  | 34721017 |
| actggctcta | ttgatggaca  | gtgtaagtca  | ccatttccc  | aggagcaaga  | 34721067 |
| acagcaagtg | ccttcatgtc  | tccagttccg  | ctctctccct | agtgcaggaa  | 34721117 |
| tcccttagct | tctcattctc  | ccccatctct  | ccaccacctc | agagctcttg  | 34721167 |
| gctcagagag | agcctggcac  | agcacggagt  | gttgggggtt | ttatttgtct  | 34721217 |
| gtctttggca | gccagtcact  | aaaacaaaga  | tgacgaatgg | agtactttaa  | 34721267 |
| agaagaagga | acgtttccca  | tttactttgc  | aagcaaatga | gatgcccaca  | 34721317 |
| tggcttccat | catctgaggc  | taccttggct  | actgcactga | ggggtgggtg  | 34721367 |



|             |             |             |             |             |          |
|-------------|-------------|-------------|-------------|-------------|----------|
| aatgagcag   | tcaactgtaa  | gaacctagtc  | taaatcccaa  | cacacagcaa  | 34721417 |
| acgctcagta  | aagaaaggtc  | tctatgagtc  | ctcctctctc  | cccttcttcc  | 34721467 |
| gccatctttc  | ttctctaggg  | tgacctcctg  | tggtagctgg  | gcgtgagtg   | 34721517 |
| taactttggt  | ttacagatgc  | ataaactacg  | gtctttgaga  | tttccacttg  | 34721567 |
| atgtgggtgc  | atagttctgc  | aacagaagaa  | gtgtctgttc  | tccttagctg  | 34721617 |
| gtcatttaga  | accatttatg  | ttttaggctt  | tagatttgac  | ctgactaggg  | 34721667 |
| aatgaagaaa  | ggacagacac  | agacattcat  | acagagtagc  | tgtgctcagg  | 34721717 |
| tggactgcg   | gcactctgat  | agagtggtag  | caactctgca  | acaacctgga  | 34721767 |
| agtatttact  | agtacagtac  | atggagaact  | tagccagtct  | cggtaggagg  | 34721817 |
| gctctgaaga  | agacagcctc  | aggctgtaaa  | catcctgtaa  | aggggagctg  | 34721867 |
| caattgcttg  | tttctgcaca  | cattggccag  | tcatttgtaa  | acacgcatca  | 34721917 |
| acatttgcac  | agaaccagag  | gagggctttg  | ccaattctga  | gccaaccta   | 34721967 |
| tatggggaag  | gctttgccat  | ccgcatgggt  | ccgagggcatt | aggcccttga  | 34722017 |
| catggctggg  | cccattgttat | cgtaaacagc  | acaagttcac  | caggacttca  | 34722067 |
| tccattcttg  | ccctttcact  | ctaggttctt  | tccgctcctc  | acatgtggtg  | 34722117 |
| atthatttcc  | tggcatgcc   | ggtctgagtt  | tggtatggca  | accctacctg  | 34722167 |
| atcgtgcaca  | ctgctcagcc  | catgggggttc | aatgagaatg  | caggggtgtag | 34722217 |
| gctgggggtga | agaggcacat  | gggattgagg  | aggggatggg  | acagtgggag  | 34722267 |
| cttaacaatc  | ccacctgaca  | cccacatttc  | tttctataag  | gtgatgtatg  | 34722317 |
| ttaaaggaat  | gtgtgaacat  | tgaggtgtta  | ctagaatgtg  | tatcggagaa  | 34722367 |
| ctgtgactac  | aatcagagtt  | tctgggtgtg  | gctttagttt  | tattagctat  | 34722417 |
| gactttgctt  | gcagaaagcc  | tttcttaacc  | tcttaaatca  | aattaacctt  | 34722467 |
| ttattaagtc  | ttaaattaag  | cgggagtc    | agcaggaaag  | agaccaggct  | 34722517 |
| atgccattct  | cactgtgaga  | gtgcataggc  | agtatgtgta  | tttgttagat  | 34722567 |
| cagtgtgtgt  | gtgtgtgtgt  | gtgtgtgtgt  | gtgtgtgtgc  | gtgctcatct  | 34722617 |
| gtgtgtgcat  | gagagtatga  | atattgcatc  | cctttttatg  | gcaaccctca  | 34722667 |
| agtagctctc  | tgccaaagat  | gtggatacat  | ggcttgtcct  | gccaagagcg  | 34722717 |
| gcctctgccc  | tgctgataca  | gtttggctgt  | gggcagctgc  | atgtctttca  | 34722767 |
| tgtgtttggc  | tgtgggcagc  | tgtgtgtctt  | tcattgtgtg  | aacatggaga  | 34722817 |
| aggcctagga  | acctgtgggg  | agggcactgt  | cctaatgggt  | tggaaagagaa | 34722867 |
| gtcagttgtg  | agggacaaag  | tgtggggtaa  | accttgca    | ttttcaagtg  | 34722917 |
| gggacgtatg  | gatagggacg  | tatggatcag  | ggccaagt    | gctaacagaa  | 34722967 |
| accagtgaga  | aatctggaga  | acatacttat  | aagtcttaaa  | ttcttttttt  | 34723017 |
| tcaatttgac  | attgcatgta  | atthtaaaat  | gcacgattgc  | tccttgccc   | 34723067 |
| gtgccggcaa  | tggctatctc  | atthcagttcc | cagggctagc  | ttcccaaac   | 34723117 |
| ctctaacaac  | tgcccagtc   | gagccctttc  | tcctgcccac  | ctgagtcgcc  | 34723167 |
| acggatggaa  | aacaccagac  | agcctttata  | ttthtaaaact | agcttgataa  | 34723217 |
| ttcaatggct  | gggtgaagaa  | tatcttgccc  | tatccttctt  | agcctcagca  | 34723267 |
| gctgcctg    | gaggctacaa  | actgagagtt  | acaggtctgt  | tacttcagat  | 34723317 |
| ccactccaca  | gcctgctctg  | actccctctt  | cctctctctc  | aactcttctt  | 34723367 |
| cctgagatct  | ggaaattcct  | ccttattctt  | cgctccagcaa | ttggcttctg  | 34723417 |
| ccttctttat  | tggccagtta  | aaatgggaag  | aatgttcacg  | tgaaatcacc  | 34723467 |
| cgagtccatg  | atccactcct  | cttccgggca  | gcccctcttg  | aggaagcaga  | 34723517 |
| attagcatca  | aaaatgcaaa  | cagcacaatc  | cacaacaagt  | tgagaagagg  | 34723567 |
| gaatttcaac  | ggaggagatg  | catccatcag  | attaggctat  | agtctcgctt  | 34723617 |
| gtgagagcat  | tttcttgact  | gttgattgat  | gtggaaggtt  | gagtctactg  | 34723667 |
| agggcagcgc  | tgtccctggg  | caggtgggtc  | atgggctgta  | taagaaagca  | 34723717 |
| agctgagaaa  | accagaagcc  | acaacaggt   | aaacaccaca  | ctcttccatg  | 34723767 |

|             |             |             |            |            |          |
|-------------|-------------|-------------|------------|------------|----------|
| gcttctgctt  | ccatgcctgc  | ctccaggttc  | ttatctttcc | tcagtggacc | 34723817 |
| gccatggtag  | gcatggttgt  | gatcatttca  | gaaattggga | gactgaaaat | 34723867 |
| gaacgagtag  | agaggatgca  | tgtgttacac  | aactgtaatg | tgtagatcac | 34723917 |
| cagaactcat  | gtgcctggag  | ccaaactcca  | acaggcccct | tagtggagaa | 34723967 |
| gtagacttgt  | aatcctggag  | gcctattcat  | ctgctccttt | ccttacactc | 34724017 |
| tctccctaac  | agtgatgtgg  | tgccatgtct  | gataaaatga | aatggcattg | 34724067 |
| tggtctagaa  | gcatcttagc  | tagactttct  | gttgtagtaa | taaagcaggg | 34724117 |
| tgagtcaaat  | caagtcgggg  | aggaaagggg  | taatgaactg | atgcagagga | 34724167 |
| gaagcactgc  | ttgttggtt   | gctccgctg   | ctttcctata | gtactcagga | 34724217 |
| ccaccgtggg  | tagtcctgcc  | cacagtgagt  | tgagccctcc | catattagtc | 34724267 |
| atcaataaag  | agaatgtact  | acagacttgc  | ctgcaggcga | attcagtggg | 34724317 |
| ggccttttct  | gagttgaagt  | tcccaaataga | ctctggctcg | tgttgacata | 34724367 |
| aaactagaca  | gcacaagagc  | gacttgtaaa  | tttttaaaat | aaaaacttct | 34724417 |
| attcacttaa  | gaatgcacat  | gtatttgttt  | agaaggtatt | tgcgcgtgtc | 34724467 |
| agtctaatag  | acattggcag  | tatatcattg  | agtcgagcac | gcatgccctt | 34724517 |
| tatcctggtg  | tggtttacat  | tccactgggg  | agacagatgg | tcttaatcaa | 34724567 |
| acggttactc  | ctctgtttgtg | atggatggga  | tgaagacagt | gtcaaggatt | 34724617 |
| tgataagtgt  | gcctatccca  | ggaccagac   | ttatctttgt | gggaccagaa | 34724667 |
| gtctgtggag  | tgtgtctggt  | cagctctttg  | gttcctgggc | atTTTTTTTT | 34724717 |
| tttaacttaa  | gtatgggaat  | ttaaagactg  | ctttttatgt | aaatttcctc | 34724767 |
| ccacatcctg  | atgcatgggtg | ctaactcttt  | agggttatag | ttaacattca | 34724817 |
| agctgtgatc  | tgtcccattg  | gcttgagggg  | acacctcagg | cttgagacat | 34724867 |
| gtcttccaca  | ctgctagctc  | cacgtgtttg  | acctggtcct | gtccaaatta | 34724917 |
| aagcccctta  | ggtcaccaga  | catcctaggt  | gagaaggctt | gagatggatt | 34724967 |
| ccgtctcttc  | tctgtaagca  | gctttgggtg  | ctataaattg | ctgtcttata | 34725017 |
| gccaaagggt  | ttggggtagc  | tccttgtgca  | agatcttcca | aggacctgtg | 34725067 |
| tgactggcag  | ctgttccctt  | cagtgcgagc  | ctcgggcttc | ttggttttac | 34725117 |
| tggtcacagt  | gattaacctt  | tctgcctgga  | ggaagagatg | gatgaaatta | 34725167 |
| agatgctgat  | ttgtgtttgt  | cctcccttgt  | tccttaaagc | ggcacacctg | 34725217 |
| agagtcagcc  | actttcccct  | ctgctcttgg  | tatttgaaga | gggccagcag | 34725267 |
| tgagaacaga  | tggtgacaga  | ggcggctgga  | aattagctgg | aataaggttc | 34725317 |
| taaagtatga  | tctggggact  | taaagtacag  | tcaggaaagc | ctaaggctct | 34725367 |
| tttgagagccc | agatgattgt  | gtgtgtgtgt  | gtgtgtgtgt | gtgtgtgtgt | 34725417 |
| gtgtgtcgga  | tgacatttgt  | tgttctgctt  | ctcttatctc | tccatatgtg | 34725467 |
| gcatttccta  | gccactatag  | ataacgctga  | tgtcacagta | cactagattc | 34725517 |
| agaaacagat  | aaaaaagatc  | taatttttgt  | tactagggca | gacgttaatg | 34725567 |
| acaatttgtg  | agttggcaag  | atggctctgt  | gggtaacttg | cgctgtgaga | 34725617 |
| ctgacaacct  | gaatgatcct  | tggaaactat  | gttaagggtc | aaggagagaa | 34725667 |
| ctgactctat  | gacgctgaca  | tcctcagtgc  | aaccattgct | tgcaccctca | 34725717 |
| tacagtaaca  | ataataaata  | aaattgtcag  | gattggatgg | tagctcagtg | 34725767 |
| gtagcacttg  | tctagcttgt  | gggaagtcct  | gatttcata  | cccagaacca | 34725817 |
| tatacaccat  | acaccatgca  | cacacagcac  | acgtacacac | acacactgta | 34725867 |
| ttttatTTTT  | atTTTgtgtg  | atTTTgtgtg  | attctctgga | actggagtca | 34725917 |
| tgggctgTTg  | tgagcagcta  | tgtgggtgct  | gggacttgaa | ctcaagtctt | 34725967 |
| ccagaagagc  | agggaatact  | cgtaagtgga  | gagatgcctc | tcttgacca  | 34726017 |
| gaagggtttc  | ttgaactcag  | gaatttgagg  | ccagcttggg | caacacagtg | 34726067 |
| aagccctgtc  | tcagaataaa  | aaaaaaaaaa  | ggaaaaagaa | aaaaattata | 34726117 |
| ttaacatgta  | ggcttattgt  | cgatgtctta  | tgtgaattac | tatttaattg | 34726167 |

|             |             |             |             |             |          |
|-------------|-------------|-------------|-------------|-------------|----------|
| aaatatgcat  | caaaccttga  | tagcaataac  | tcaccaacaa  | accctttggc  | 34726217 |
| tctttcataa  | ctttaaggga  | tataaaggct  | ctttgagatc  | acagaagctt  | 34726267 |
| caaccacagt  | gctggaaggt  | caaggatgtc  | tcaggtgttg  | taggtgttgg  | 34726317 |
| ggctttgcct  | ccttcttatg  | aatccaccag  | caccaacag   | ggctcaaact  | 34726367 |
| caggatgctt  | agtctgcgcc  | ttgggttcta  | ggggaatacc  | ttgatgtcta  | 34726417 |
| cagtagggat  | ggtgatattt  | tgtgctctga  | gcccagggtcc | taagtctcac  | 34726467 |
| tgggttggga  | tgacactgtg  | ctccatgaag  | tgctgagcac  | gccgtgttcc  | 34726517 |
| tacctacagt  | cccagcacgg  | gagttctcag  | ctatctgcct  | cctgagtgag  | 34726567 |
| cctcctgcac  | tggacatctg  | aaatgggtgct | gccttggctc  | aaggaagaaa  | 34726617 |
| gagccaggtc  | tcaggaagca  | catgtcccat  | gagcttatgg  | taatctcagg  | 34726667 |
| ccagctgcac  | caaggagtgt  | gagtgacagg  | ccaggccaga  | tgtggagtgt  | 34726717 |
| gggaagagcc  | cagcctatct  | ggggctcaat  | tctctgcttg  | acgggggtctt | 34726767 |
| tccagtcgct  | ttacactcag  | attggagtct  | gcagctctgg  | acaagtcaaa  | 34726817 |
| acctgtgagc  | ttccacctct  | ggctccctca  | gccttcaactg | gtgtggcagc  | 34726867 |
| caggggtttc  | aaaggtcacc  | ccagctgggc  | gaattagaac  | aacagatctc  | 34726917 |
| ccagcaaagt  | tggctgcccc  | cgcccgcaga  | aggcaagtgt  | caacatctgc  | 34726967 |
| gaggagagtt  | agaacaaagc  | cccttacttt  | ctctgtctgg  | cccagcctct  | 34727017 |
| gtgcgcttgg  | atcgctcttc  | tctctccatt  | ctcaactggac | cttggaccag  | 34727067 |
| ggtctcagca  | gcagtgacgc  | tggcctctgc  | tggaagctgc  | gtggggaagg  | 34727117 |
| cggctgccgt  | caggtgtgtc  | tttggatagc  | cctgtgtgtc  | cctgccccac  | 34727167 |
| tttgcttggg  | tgggtggtgg  | cgaggcagcc  | tggcacagct  | cagtggagga  | 34727217 |
| ttaagagaga  | ttagggtatt  | tgtcaggatt  | caagtgcac   | gctgagaggc  | 34727267 |
| ttaaagaaga  | cagagggagc  | ccgtcagtgc  | ctgggggtgt  | tgtactcttg  | 34727317 |
| atthttgccac | ctctgatatg  | tgtgtgaag   | gagggggagg  | tttccaggca  | 34727367 |
| gggtgccaca  | cctgcttggg  | ggcaccatcc  | agcaggggaag | cttaggtatt  | 34727417 |
| tccaagatgt  | cctgtgcctt  | agagcttcca  | agactgatct  | catgtgtgtg  | 34727467 |
| cttggagtgc  | tggagggacc  | gctggccttt  | ccaaccccac  | tctgctggct  | 34727517 |
| aactcgactt  | ttttgttcca  | agaatctgtg  | tgtcaaagca  | gcactctctc  | 34727567 |
| ttggcaagtt  | cctttctagg  | ttcaagagac  | gattaaacgc  | gcttttgatc  | 34727617 |
| aaatataaaag | tccagtcacc  | tcagagctgc  | tttgagtgat  | tactaaattg  | 34727667 |
| tgttactcgt  | ggaaacctta  | tacggagctt  | ggctttggct  | cagacgttag  | 34727717 |
| cgggccactg  | ctcttttgac  | ctctcccttt  | gtggttttat  | cattctcctt  | 34727767 |
| tgtctattag  | tctgcatttg  | actgagtatt  | gaacaaccgc  | ccccccccc   | 34727817 |
| cccggctgcg  | ggtgtttgat  | tgcagctgct  | gagtattgcc  | ctgccaacag  | 34727867 |
| agatagctgc  | agataaccatc | cagtcctctc  | gatgttctct  | tgtgctcacc  | 34727917 |
| aggtttgatg  | ggggttagag  | aggaatcagg  | agggtttggc  | ttagtattat  | 34727967 |
| attaattctc  | ccctgaaatg  | tgcagtagcc  | atctattgac  | agcatgacag  | 34728017 |
| gaatctgaca  | gcagctatgg  | ggtgatgggg  | taacggagtgt | tcggggagta  | 34728067 |
| gatgggctat  | ttgtcatgac  | tacacagctc  | ggagcttaga  | tctgggttttg | 34728117 |
| cccctgcgac  | agaggagtta  | cctccccctg  | ggatccgccc  | cacagaggac  | 34728167 |
| tagatggttc  | ctggcaatac  | tgacttatct  | gtgtcttttc  | aacctgaagc  | 34728217 |
| taagtcctgt  | cttgtcttct  | gtccttttagg | ccaagtgtgt  | cccttttaaa  | 34728267 |
| athtaattta  | aaatttaaat  | gtatgtatgt  | gtgcacatac  | atgtgtgtgc  | 34728317 |
| atgggtgccca | cagtgtgagt  | gtagcaaacc  | tgaggacagc  | ctcaaatata  | 34728367 |
| agccctcact  | ttccattctg  | ttggagccaa  | ggttgctgtt  | gtttctctgc  | 34728417 |
| tgtgtatgcc  | aggctaggtg  | ggccccgagc  | atcccaggat  | tctcctatat  | 34728467 |
| ctgctatgtg  | cctggttttt  | atcgattctg  | gagattcaga  | ctcattcttg  | 34728517 |
| cagagcaatt  | acctttatcc  | actgagctat  | ccccgagct   | cacatgtgag  | 34728567 |

|             |             |             |            |            |          |
|-------------|-------------|-------------|------------|------------|----------|
| agaatgtgtc  | agtgagagca  | tctgggaccc  | ttcggagact | ctgacggaca | 34728617 |
| tcggcaaaat  | catgaggact  | ctggagtcgt  | gagggtttgg | agagactctc | 34728667 |
| tggggcctgc  | tttcgcttct  | ttgagtttcc  | cactgctctg | aaaggctggg | 34728717 |
| gaggcttttt  | gtcttctaga  | gcagaaaggg  | gaatgttaat | ttttttgtca | 34728767 |
| ttgtcacaaa  | cccctcagag  | aaatgattca  | ggagggattt | gctttggctg | 34728817 |
| atgttttccag | tctgtgggtg  | gatggcttcc  | ttggttttgg | cctacagtga | 34728867 |
| ggttgaacat  | cttgcggaag  | gatgcgctgg  | accagcagc  | ctgtctcaca | 34728917 |
| gtagccggga  | agctagtgca  | gagacaggaa  | aatgcccttc | aaaagcagcc | 34728967 |
| agcccccttt  | cctgtgatct  | acttccttct  | accgggcccc | accctctagt | 34729017 |
| agcccattgg  | tgtgaactca  | tgagtatatg  | aatccactgg | taagtcagtg | 34729067 |
| ctcagggatt  | agactctgca  | tctagaaact  | gaatcttgaa | tagtagacca | 34729117 |
| tggtaaagata | ctccaaacca  | taactccgag  | tcacctctcc | tgcccttctt | 34729167 |
| cctctggcga  | ctctcaggcc  | ccctgcctgt  | tttacctcca | gttaccaagg | 34729217 |
| acagtctgga  | ccactggaag  | atatgacggc  | cctctgcccc | tgctctgact | 34729267 |
| tctacttcta  | agctcgggtga | ccttgaagca  | taagtagttt | atcgggcttc | 34729317 |
| cttgtccttg  | gtgaaaggag  | atcctgagca  | cagcctgtag | gattgacagg | 34729367 |
| atgaagtgac  | agggaccaca  | agatgtagtc  | aacagctgtc | ttattcacia | 34729417 |
| aacactgcag  | ctggaggctg  | ccagcaggct  | caggcttctc | ctatcgagaa | 34729467 |
| ttgcctcagg  | atagttgggc  | ttgcctaggc  | tcctttgtct | ttgatgacag | 34729517 |
| ggtctgtatc  | tttaaggtgg  | tcacaagctt  | ccttttgggc | aagggatgct | 34729567 |
| gtgacacatt  | tcatttagat  | gttttttata  | ctaagcctct | tgcttatata | 34729617 |
| ttactgcata  | cctgctcata  | tctttgctct  | accctgcaag | gttcatatcg | 34729667 |
| ttcccatttg  | acagaagaaa  | aaactgagcc  | aaagagaatg | gaggtcctct | 34729717 |
| gatccatctg  | taactggaaa  | tcaacagtgt  | tgctgagttt | attggtgatg | 34729767 |
| ttaaagaagt  | ctgagcttcc  | cgttacctgg  | attgcctcct | accagttct  | 34729817 |
| agagctacct  | gtacggagtg  | tgttactcac  | ctcagtggca | ggggatgtgt | 34729867 |
| gtggttgacg  | cagtgcctca  | tccagactgg  | acctaggtag | ccatgcatta | 34729917 |
| cacaaatgca  | aacaacactc  | ctcccacaca  | tgtaactgtt | cattattgac | 34729967 |
| acatagtagg  | tgctcagtta  | atatactctg  | agtgaataaa | tatctcttta | 34730017 |
| ttcttgccat  | taaaatcata  | ttgtgggctt  | gatgagatgg | ctcaaccatc | 34730067 |
| aggaggatca  | cttgtctgaac | tttctgaggg  | ccaagttagg | gtttccagca | 34730117 |
| ccctgtcaat  | gccttcttcc  | agcctgcttg  | acacttgtag | acatgtaaca | 34730167 |
| tatactcaca  | tagacacata  | cacatcaata  | aatgtttca  | aaaaattata | 34730217 |
| acagtagacc  | ggagctctca  | tacttattac  | aatactgttc | acaatagcca | 34730267 |
| atgcatggaa  | tcaacccaag  | tagccaacga  | tggtggaatg | gttaaagaaa | 34730317 |
| atattgcata  | tgtatccaca  | caaagtagaa  | tattattcac | ccaataaaaa | 34730367 |
| agggaaatcc  | tatcatttgt  | gacaacatat  | agataactgg | aggagattat | 34730417 |
| gttaagttta  | atacactggg  | tccagaataa  | cagaagtgtt | ttaatccata | 34730467 |
| tttagaaact  | tgaatgattt  | catagaaagc  | agaattgtgg | aaactgcagt | 34730517 |
| ttgaaatgtg  | aggacgcaga  | atgaagctgg  | tctgtgttgt | ccgccttctc | 34730567 |
| acactgtgat  | gaaatccccg  | aggaaaagca  | acttagagga | agaaagggtc | 34730617 |
| atcttggctc  | acagtttcac  | aggtctcaac  | ccatggtcag | ttaattccat | 34730667 |
| tgttctcaac  | ccatggtcag  | ttaattccat  | ttttcagggg | cctggagcaa | 34730717 |
| agcaggggat  | catggtactg  | tggaggaggc  | cctaggacta | tcaggaaaaa | 34730767 |
| aaagaaggac  | agaggaagga  | gctgggggttc | cagcgtcttc | cctgagagtg | 34730817 |
| aacccccaat  | tctcgcacac  | ctgtcactca  | gcacaaaggg | ctatactgcc | 34730867 |
| tcccagaaga  | actgcagact  | ggtagcaag   | cctttcacac | atcttagtag | 34730917 |
| ataatccaag  | tctaaaccac  | agcaggcacc  | aaaatacagt | tagtttccag | 34730967 |

|             |             |             |            |             |          |
|-------------|-------------|-------------|------------|-------------|----------|
| gccctttagc  | tcagggaggt  | acctttggct  | tccacaactc | attatgtatt  | 34731017 |
| aataaagagc  | tgacagtgtc  | caaggagatg  | gacctgtagt | cactgtgtct  | 34731067 |
| ggtcacgtac  | acatcgtgtg  | catgtgttta  | attatcactt | tgccaaccaa  | 34731117 |
| aaaatgtcac  | atcctgatgg  | ttttgaaatg  | attcttcata | cacacacaca  | 34731167 |
| cacacagaca  | cacacacgct  | cacacattca  | ctcacatact | cacagacaga  | 34731217 |
| cacacatacg  | aagcacaata  | atgaagtgtg  | gaggacacta | actgttgact  | 34731267 |
| ctcagtgagg  | gatgtttggt  | ggcactttct  | ttgtattctt | gaaatttttt  | 34731317 |
| aataatttta  | aaaattttaac | atttacatat  | tatcacatac | atagtcctttt | 34731367 |
| tattttctgag | gtgccctgt   | atgtggccat  | tctcattggt | gaaatatata  | 34731417 |
| tatatttcat  | atatgtgtgt  | gtgtgtatat  | atatatata  | aaatacatat  | 34731467 |
| atatatata   | tgatttaagt  | aatgacatca  | ggatttttcc | atacacattt  | 34731517 |
| ggctagctca  | gattctctcc  | tgataatgta  | tttctgcaca | taggattact  | 34731567 |
| agaaagagga  | gtggacaccc  | ttttcttcag  | catcctcttg | ccacattgca  | 34731617 |
| ttccagcacg  | accatatagt  | ttatcatgct  | ccctggatga | cagcacgggc  | 34731667 |
| atgcctgtct  | caccgtggtc  | tcaccagtgc  | tgtgtgcttc | cttttctctt  | 34731717 |
| gatgcagtcc  | ctctggtttg  | cacaaacaca  | ggttgtgggt | gtcttgcagc  | 34731767 |
| atgggattct  | cctggggcca  | ggccacattc  | aaatgtttac | tctgcaacac  | 34731817 |
| tcgggtcctg  | gaatgatttc  | ttattctgtg  | aaaatattct | gatgtgggtt  | 34731867 |
| tcattgcaaa  | cattttttcc  | ctgtactatc  | atccgtcttt | gaatgtggat  | 34731917 |
| ggcatgcttt  | agtgggcccc  | ccaaatctta  | ttgttaaagg | acatttttag  | 34731967 |
| agtcaattga  | gtggctttaa  | ccttgtactg  | ttactgactg | tggcaggaga  | 34732017 |
| cacagcgcgc  | agggcacaca  | ctgggctcaa  | gtgacaggcc | tgccccctct  | 34732067 |
| tgtgttgact  | ttggacaaat  | ttctaactct  | tgcacagggt | tctaaccctt  | 34732117 |
| aaaatgggat  | ggagagatta  | gctgttgctt  | agtgtataa  | ggagcaaag   | 34732167 |
| aaccgtttat  | ttacagacta  | tgttcctgac  | acacaggaaa | tgtgactcag  | 34732217 |
| gtacttgctt  | ttcttgttac  | ctcctgcaac  | cagcctggaa | aggaattttg  | 34732267 |
| tttgaaagc   | aaatgcctta  | tcagagaaag  | agaagccagg | tttgttgggc  | 34732317 |
| aaaagactta  | tattcagata  | tgcccactaa  | atgtttgca  | tgaagaaact  | 34732367 |
| gcaaatggc   | cagaaatagg  | gaactaatca  | gacacctgca | ttttaatttg  | 34732417 |
| cttaaatacag | ggttgttttg  | tttttacctt  | ttctttttcc | ctctgtgaaa  | 34732467 |
| cagagaatga  | ataagagagg  | gagaaagaca  | gacagatagg | ccatatacac  | 34732517 |
| acgtgtgtgt  | gtgtgtgtgt  | gtgtgtgtgt  | gtgtgtgtgt | gtgtgtgtgt  | 34732567 |
| gtgtgtgtag  | aagtcatagg  | aggactccag  | atgtcctggt | ctgtcactcc  | 34732617 |
| ctccccttat  | tcctttgagg  | tggtatcttc  | acctggacct | agactggtag  | 34732667 |
| ccaaccccag  | taatcctcct  | gtctctacct  | ccagtagcag | tgaggtagg   | 34732717 |
| tacatggcct  | tgtgcacctt  | tttgtggatc  | ctaacttagt | ttctcatggt  | 34732767 |
| tgtgtagcaa  | gtgcctttta  | cctatgggtc  | catctctcca | gactttaaac  | 34732817 |
| cagatagatc  | tctctctctc  | tctctctctc  | tctctctctc | tctctctctc  | 34732867 |
| tctctctctc  | tctctctccc  | ctctgtcctc  | tgctctctct | ctctctctct  | 34732917 |
| ctctctctct  | ctctctctct  | ctctctctct  | ctctctctct | cacaccacac  | 34732967 |
| acacacacac  | acacacacac  | acacacacac  | acacagagg  | ttttctgtg   | 34733017 |
| tagccctagc  | catagttgtc  | ctggaactca  | ctctgtagat | caggctgtct  | 34733067 |
| gtctcccaag  | ggctgggatt  | aaaagtgtgc  | cctaccacca | tctggccaaa  | 34733117 |
| tcagatttct  | taaaagcttc  | ttatccaaaa  | aggggggggg | cagagagagg  | 34733167 |
| ctggagagat  | gcttcagcag  | ttaagaacac  | tgactgttct | tccagaggtc  | 34733217 |
| ttgagttcaa  | ttcccagcaa  | ccacatgggtg | gctcacaatc | atctgtagta  | 34733267 |
| ggatactatg  | ccctcttctg  | gtgtgtctga  | agacagctac | agtgtactca  | 34733317 |
| tataaataaa  | atatatcttt  | tccaaaaaag  | cttcttgccc | actcaattta  | 34733367 |

|                   |                    |                   |                    |                   |                 |
|-------------------|--------------------|-------------------|--------------------|-------------------|-----------------|
| aagaaaat          | aggaggaaaa         | attaggttt         | ctaattggtt         | gctctatatg        | 34733417        |
| gtttgcttt         | tgctgtgtaa         | aatgcctact        | tctctatacc         | cacagaacag        | 34733467        |
| caccatctt         | cataacagaa         | tggtgggtat        | tttcagttt          | ctcttttgg         | 34733517        |
| ctaagttgca        | taactccacc         | ctcacttctg        | ctactcactt         | gtgtctgtct        | 34733567        |
| gcgaacaggt        | tcctccctca         | cactgagatg        | gatgcacttc         | ttgggggtgt        | 34733617        |
| atcattaggt        | taggcaggag         | gagtgagatc        | tgggggtcca         | cgaggggaag        | 34733667        |
| tatgtagtgt        | agtcaactct         | aaggtgcatt        | tcagaacgac         | taggaaaagg        | 34733717        |
| ttctgtgcaa        | catcaccaca         | gagcagtgat        | aacgacccaa         | ggggatagat        | 34733767        |
| gtgctgactg        | tcctgactta         | gagcacatga        | catcaggtac         | caagacatca        | 34733817        |
| cattccatcc        | cataaacaca         | tggagtaact        | atggcaacca         | aaattaata         | 34733867        |
| ataaagcaaa        | aaccttaaaa         | agagatcata        | gacaaaggtc         | ttccaggcaa        | 34733917        |
| tttgcaacag        | gtgagtgttc         | aataagtgc         | aatttaaaat         | gttatttgtt        | 34733967        |
| tgtttgttt         | tttgtttagt         | gtgtgtgtgt        | gtgtgtgtgt         | gtgtgtgtgt        | 34734017        |
| gtgtgtgtgt        | gccgtgatgt         | gtatgtgcgg        | gtcagaggac         | aacttaaagg        | 34734067        |
| agtcatttct        | tagctgggcg         | gtggtggtgc        | acgccttaa          | tcccagcact        | 34734117        |
| tgggcggagg        | aggcaggcgg         | atctctgagt        | tcgcggccag         | cctgctctac        | 34734167        |
| agagtgagtt        | ccaggacagc         | cagggataca        | cagagaaacc         | ctgtctcaaa        | 34734217        |
| aaaacaaaaa        | acaaaaaac          | aaaaaaaaag        | tagtcatttc         | tttccttcta        | 34734267        |
| gtctgtggga        | accagggatc         | aaattcaggc        | catcatgttt         | ggtggcaagt        | 34734317        |
| gcctttggat        | caccaagctt         | tcttgccagt        | ccaccaagaa         | gtgataactt        | 34734367        |
| attattttt         | cacatcagca         | tcttctaata        | tttaccttga         | aacgtactta        | 34734417        |
| aagttgataa        | gaagcaacta         | caaagagtta        | gatattgatt         | acctcagtg         | 34734467        |
| gcagccattg        | ttccttttca         | caacagccct        | ttagtcctag         | ctaactttgc        | 34734517        |
| cagcctgcag        | acgtattgtg         | tctagtccca        | tatctgcctt         | ggacagagtc        | 34734567        |
| ccaggttcaa        | ggtgttcttg         | gcagcgatgg        | catcgtttt          | tgctgtttgt        | 34734617        |
| ccgttgatga        | aggtttatcc         | tcccaggacc        | ttagttacaa         | aggatggagt        | 34734667        |
| cagtctagat        | accgtctagt         | gccaccttc         | tttccttaata        | gcttggatct        | 34734717        |
| tcgagccttt        | gtaccatatg         | gtccttggct        | taatgccaca         | ccttcattca        | 34734767        |
| gtcaccaact        | ctcaccttct         | cacctaggcc        | cgcaacacat         | taaccccagt        | 34734817        |
| ctcctgcctt        | tcttggaggc         | ccagtgccat        | tgttttagc          | ccatgctctc        | 34734867        |
| ttacagttca        | ggcagaagca         | gctgggactt        | cccacctcag         | ggcttcacgt        | 34734917        |
| agatgtcagt        | gaaatctaca         | agccaccctg        | tttccttgat         | ctcgaccaag        | 34734967        |
| ccatgctctg        | tcagaaaaca         | aatggaagct        | cttagtgggt         | actatgatgg        | 34735017        |
| cagggtgtggc       | ctgggagctg         | ggctctagga        | ctggctgttt         | ttcatctggt        | 34735067        |
| accttatatg        | gagaggccac         | aatgggctca        | aacctatagg         | ctgggcaagt        | 34735117        |
| ggtatctatg        | aggaagccgg         | catgcgtgta        | ttgtaagacc         | tgacttgctc        | 34735167        |
| ctcttctttt        | gtag <b>ACCATG</b> | <b>GGGGACGTGA</b> | <b>AACTGTTTGC</b>  | <b>CTCGTCACAC</b> | <b>34735217</b> |
| <b>ATGTCTAAAA</b> | <b>CCTCCACAG</b>   | <b>TGTGGATCCC</b> | <b>TCGAAGGTCA</b>  | <b>GCTCCATGCC</b> | <b>34735267</b> |
| <b>TCTCACCGAG</b> | <b>GCCCCAGCTT</b>  | <b>TCATTCTGCC</b> | <b>CCCTCGGAAC</b>  | <b>CTCTGCGTCA</b> | <b>34735317</b> |
| <b>AAGAAGGAGC</b> | <b>CACAGCCAAG</b>  | <b>TTCGAAGGGA</b> | <b>GG</b> gtaagaag | tgtggttgat        | 34735367        |
| caagaggcag        | gggaggccgg         | gagcggggag        | cattcctcac         | acctcattct        | 34735417        |
| cagtaagcct        | gacgtggcag         | agagcctcgt        | ctccctttgg         | gccttcacat        | 34735467        |
| aaattgaatg        | tataccatct         | tgctgtttct        | tggttcatgg         | tgagctttgg        | 34735517        |
| tctgtgtgaa        | tagactcagt         | aatggaggag        | accacggaaa         | ttgaccatct        | 34735567        |
| taaggatatt        | tgctgctgga         | tatgttctgg        | atacatgtgc         | ctgggtgtcaa       | 34735617        |
| gaggaatgca        | tcttgggttt         | aaatatgtgc        | tccagaacct         | gggctcctga        | 34735667        |
| gaaatgaaat        | gaattttctc         | ctatgtcttc        | cctggaagga         | acatttttat        | 34735717        |
| cagctgacct        | cttgattcca         | cgcagcgtag        | tggaatgaca         | aatagaatcc        | 34735767        |

E2

|             |             |            |            |            |          |
|-------------|-------------|------------|------------|------------|----------|
| tgatgtcatt  | ttgtcacctt  | ctgccaaaca | atctcgagct | tgtgaccgtc | 34735817 |
| tggggcctcc  | atcttctcctt | ctgaaagtat | gaacaacctt | tctcgctgce | 34735867 |
| ttcttggttaa | ataggcgaag  | atcagaacat | agaggaaaag | ctataagact | 34735917 |
| ggctgatgct  | ttaactcagg  | gaaaaccctt | ttagtaagcg | ttaggtatta | 34735967 |
| aattagcttt  | acacggaggt  | gacgtgagca | tgagggaggt | tatggttagt | 34736017 |
| gttgagatc   | aagcacaggg  | gtccgtcccc | ccccccccc  | cccggaagct | 34736067 |
| taaaggcctt  | ggtgtgagca  | ctcaatgaag | aataaggaat | tcctgtgtct | 34736117 |
| ctgtgactct  | gtaggtgtga  | gaccctggaa | gcaggtgaag | aaaggcccaa | 34736167 |
| cagacatgtc  | ttggtgctat  | tggccttacc | tgtgtgtagg | tgacaggtta | 34736217 |
| cgccatcttg  | tcacttgag   | agtgttagg  | aaaagggcc  | gagcttcact | 34736267 |
| gaattgtaaa  | tgagacactg  | gcctgtccag | ttaggacctt | tgagaataga | 34736317 |
| tctgtcccac  | catccgtatt  | tcttttattt | tatctaaagc | agatcaagg  | 34736367 |
| gtcaatatta  | gggatgtgta  | tggaggttcc | accagcacga | aactctctcc | 34736417 |
| tgttgcccta  | aatttaatac  | acctccttat | atccctacc  | aggaagaaac | 34736467 |
| cctgaatggt  | cggtcagaaa  | gaggaagtac | tgattcatgc | cacagcattt | 34736517 |
| gtgacccttg  | aaaacattct  | agcacacgaa | agaagccagg | caggacagga | 34736567 |
| caaaaccaca  | taattcttat  | atctcattcc | agtatggcat | ctttgagaac | 34736617 |
| agaaagaaga  | tgagcagccc  | agcaggtatc | ggagagaggg | ttgggcgtgg | 34736667 |
| ctgccgggtg  | ttcagtttct  | tcctgagatg | gtgaagatgc | tctgaaacta | 34736717 |
| gatagtgtg   | gtggccgtgc  | acctctgtga | atgttcttat | aaagcgtga  | 34736767 |
| actgtacaca  | ttataaaatt  | taacagccct | ttaagacatg | ccttagtcag | 34736817 |
| cagaacaccc  | cacctctta   | ccacactgct | gctgagcgac | agctcctgcc | 34736867 |
| ttggtttggc  | tttctcacag  | cacagtgaag | cccagctgc  | tgctatggcc | 34736917 |
| attgtcacia  | aagagccaca  | tctttgagct | gagagccttg | gaacctcat  | 34736967 |
| gaaacaaaca  | ctcacctggt  | agttagtga  | tctgctctct | tgtaccttct | 34737017 |
| ctgaagccag  | gctttcatta  | tctgaggaaa | aacagaacaa | aacaaaacct | 34737067 |
| gctagctgtc  | cctagttcac  | aagaggctgg | gaagaacagc | taataagaca | 34737117 |
| ttaaaagtac  | ttcatgatgt  | tacgcagtac | ttctctggct | gatttgaaaa | 34737167 |
| tcacataata  | caagttcaat  | caccttgaac | aattcagtat | catttggtac | 34737217 |
| agttaccaag  | ttgtgtaagt  | tactggaacg | aatcactga  | gttaaatcac | 34737267 |
| ttaaagtgtg  | ggtttctttt  | gactcctggt | tactaagctt | tcagccaagg | 34737317 |
| ttgcctggcc  | tgttgctttt  | gggaccatgg | aggggcagca | gtgacagtag | 34737367 |
| gacatatggc  | acacaaagct  | accaccctc  | tgtgaccag  | aaacaaacag | 34737417 |
| gagtcaggg   | ccccaacagc  | cctttcaaag | gcgcattccc | aatgacttaa | 34737467 |
| ttcccttcca  | cgaaggctcc  | acactctaag | gggtctggca | acaccagta  | 34737517 |
| gtgaccaccc  | tagggacaag  | ctttcattat | gtgggcctct | tggggacaaa | 34737567 |
| ccaaatccaa  | attataccag  | tgttgactgc | agaatccttg | aacagcctt  | 34737617 |
| gtcttgagag  | tatttgattt  | tgacttatgt | tgaccaacta | gttgactctg | 34737667 |
| catattctct  | gtggctgtgt  | gttccttatg | aatcatccca | tgggtctgtc | 34737717 |
| ttgccacttg  | tgaacccac   | caggatcagc | ccggaacact | gccttggcag | 34737767 |
| gatgctgaaa  | tatgcacaga  | aggctgttag | gaagggatag | tcatgtagtc | 34737817 |
| cctggcttac  | ttgaagcaat  | agaagctgtg | gctgaaacta | ctctgccaac | 34737867 |
| acgtgtgctc  | ctgtgcccac  | aaacacacag | aggcattcgc | attagggag  | 34737917 |
| ggtcacctct  | gatgacccca  | ggatgaggaa | gccggttgtt | ttgataccaa | 34737967 |
| aggtagagct  | gagccaggg   | catcctctct | tggtagcccc | acagaaatat | 34738017 |
| aaaagcaaga  | tgatagtgtt  | agagttccat | ggctttagga | gttgctctta | 34738067 |
| agagaaactg  | agctctgaat  | gcactcactt | gcttggccag | gggcaccacc | 34738117 |
| accaccaagg  | ctgcctctgg  | accgctggac | actgcctgca | gtaccctcct | 34738167 |

|            |             |            |            |             |          |
|------------|-------------|------------|------------|-------------|----------|
| ctcattgggc | acacagcctg  | tccagacct  | gtgtctgcc  | cacagcctgt  | 34738217 |
| gtaggacagc | agctttgaga  | actgggctct | cccaggagct | cagtgggtgcc | 34738267 |
| cttttcagat | tgtggttcac  | cattcagttc | tgctggcag  | ttcctcttgg  | 34738317 |
| cctcttcctt | gctgatgcc   | aagaactcct | gctggcctcc | ccctctccct  | 34738367 |
| agagagttgc | catcccaaat  | gaagcctcca | gcttcttctg | gagaggctcag | 34738417 |
| gaactgtgcc | ctcattgaaa  | ttcagtggat | gtcacaaatg | tgaactcggc  | 34738467 |
| atgaaggcta | ttttcccacc  | tcctctaggg | ctgtaattag | cagttggttg  | 34738517 |
| gaacttgggc | gtattgcttt  | tattcctgaa | aactaaagcc | aactgccctc  | 34738567 |
| tcacttccat | ttcctctctg  | tgctacttt  | taagcaaaaa | tctagatgaa  | 34738617 |
| cctcacctct | gataatacaa  | ttcttcctgt | catctaggac | gtgggtgact  | 34738667 |
| ttagcatggg | attgcaatc   | ccctttgggt | caggcttctc | tggggcactt  | 34738717 |
| caaacttgag | tctttcttct  | catgggggtt | agtctgttgc | ttttttttt   | 34738767 |
| ttttttgaga | cagggttct   | ctgtatagcc | ctggctgtag | accaggctgg  | 34738817 |
| cctcaaactc | agaaatcctc  | ctgcctctgc | ctcctgagtg | ctgggattaa  | 34738867 |
| agggtgtgcg | caccacacc   | agctcatctg | ttgcattttt | taagcacttt  | 34738917 |
| cccactctgt | gacagataac  | acaacgaaca | cgtaacctgt | accattccc   | 34738967 |
| gtagctgtct | ctttcaatgc  | ctgcaatagg | accggagacc | tcctttgcag  | 34739017 |
| ttcagggtgg | tccagtgaca  | cctctgtgct | gaagttgtct | agagagcttc  | 34739067 |
| atgaaaagct | atctttttca  | tgattaaaaa | tacaagaagt | cagaagacat  | 34739117 |
| cttggatgct | ctcattttct  | accttaccct | ttgctgcat  | tctttgtgaa  | 34739167 |
| catagccagg | ccacctgaag  | catgttctgt | ggcccatgtg | gagaactgcc  | 34739217 |
| ccattgggtt | cctacctccc  | taccacaggg | tctgggtgta | aaaagcaatg  | 34739267 |
| ctgggaaaat | cctaaaattg  | gtgtattcgt | cccttttgcc | cacagacttg  | 34739317 |
| ccattatcaa | caaacaagca  | gaaccacat  | accagccat  | ctgtcctaca  | 34739367 |
| gaccagggg  | gctaattgctt | taaggcctcc | tgagaagtgt | agccagaaga  | 34739417 |
| aggtttcacc | caatcccctg  | ggctcattga | ggctcaccga | ggctcctata  | 34739467 |
| aatgctgcc  | ttgattgtct  | catgccagat | actggttcag | ctgtggcaag  | 34739517 |
| gcaggcaaca | tgagacaacc  | ttccttgaag | ggaaaataat | ggcttcatt   | 34739567 |
| tggctaaagc | aaaagcctc   | ttccccgttt | ccatccaaca | gagaagtaac  | 34739617 |
| cactgtcttc | aaagacatga  | ggaacttaa  | ggacatgtct | gactttcacg  | 34739667 |
| ggcccagga  | gtcctagtgt  | ggtttagaaa | agtgtgcata | cacagactgc  | 34739717 |
| agctgtgcct | atgtgtaacc  | agacagttgc | agaaagtcca | tcaacagatt  | 34739767 |
| tgctgctggc | gctggggatg  | atgtaggaag | atgggaaaag | cctcgccatg  | 34739817 |
| gttgatggga | gccacacgtg  | cactcctagt | cttgttagt  | ccacctcagt  | 34739867 |
| gacacctgga | cgtgctatgt  | caaagccttt | gcacctaggc | cttgtgctcc  | 34739917 |
| atgcacagtt | gagactggcc  | ttccttccat | gggcctaata | taatctcttc  | 34739967 |
| aagtcagtgt | ctgtttcttg  | ttggtctttg | agtcttgga  | gtgaccagt   | 34740017 |
| gtccgctgca | tgattgtgtg  | ctcaggacat | tcttgcttca | ttgaggacac  | 34740067 |
| caagggtggg | ctgtgcctga  | gctcccaggc | atcttcagtc | actgaggctc  | 34740117 |
| tgagctcatt | ctaagcctg   | ctcccacact | ccttcccata | catgtcatgg  | 34740167 |
| ggttttcccc | caggctgttc  | ctggatcaag | atgcgcttcc | tttctctccc  | 34740217 |
| cattctattg | atthagatc   | tacttccttt | agatcacttt | cctgacgtat  | 34740267 |
| ttctcttaga | gtacttaaga  | gccacgtttg | taggatgtgg | accgttaatg  | 34740317 |
| aaaatcacat | aagaccagtt  | atgaataata | accatagaaa | agacttgacc  | 34740367 |
| attctagtct | tcaaaatgtg  | ccattcggtg | atcatctctg | tgctgctgtt  | 34740417 |
| aaagaaataa | tttcaatggt  | aaactgttat | taatggtgct | tgttgccaga  | 34740467 |
| actgtgagcc | tgagttcaat  | ccccaggcta | cacgggatgg | aaagagagga  | 34740517 |
| gctggggcac | gtagccctga  | ggctcccaca | aacaaaacag | atgcatgtaa  | 34740567 |



|             |             |             |             |             |          |
|-------------|-------------|-------------|-------------|-------------|----------|
| tgaaaactca  | aaggaaatth  | gaaagttctc  | tgccctgact  | ttctgcttct  | 34740617 |
| gcttttcaga  | ggtagcaacc  | atcagcagtc  | tggatagata  | ttcagaaatg  | 34740667 |
| ttctatgcaa  | acaggacatc  | tatgtgaata  | tctttttacg  | cacacaggat  | 34740717 |
| gtatatgccg  | atctgtcacc  | tgctgccctt  | cctgagttcc  | gtttctgggt  | 34740767 |
| cgttctgcac  | actggcagat  | gggtgcacct  | catggatgtg  | cgtgagcttt  | 34740817 |
| ctcgcctcc   | attgctccct  | tctgagtttc  | cctaattgcta | aagcatcgac  | 34740867 |
| ttactgcact  | ctgtccatth  | acacgcaggt  | cagtgtttac  | ctctttgctt  | 34740917 |
| ctttcatcag  | ggtgagttct  | ttgaggtcta  | gatttgcact  | gttgaatagg  | 34740967 |
| atcaccacta  | gtcacatgtg  | gctgtctaata | ttacaataat  | gttaattaa   | 34741017 |
| taaattaatt  | taatttaatt  | gagatthttta | tttccctggc  | tatactaggg  | 34741067 |
| aaataataca  | catgctagcc  | catatacata  | tttcaagtgc  | tcagtggttg  | 34741117 |
| tgggaggcta  | atagctacca  | agtcaagcag  | cacagattac  | taggtatthc  | 34741167 |
| tgccatcaca  | gaaatcctat  | tggacatgcc  | tgatctagag  | cattcttatt  | 34741217 |
| aattcagctc  | ttaggtattg  | gtgattcaca  | cctaaaagac  | atgtaaaaaa  | 34741267 |
| acaaaacaaa  | aactgttctt  | tgctggagcg  | atggctcagc  | agttcagagc  | 34741317 |
| atthgcaact  | cttacagagg  | actagaatth  | tattcccagt  | gtccacacgg  | 34741367 |
| cagctcatga  | acctgcttga  | agctccagtt  | acaggggatc  | caaatctthc  | 34741417 |
| tgagcttggc  | tggcacgcac  | atgggtgctcc | ttcacacaca  | caggcctgta  | 34741467 |
| cacatacaca  | catacataaa  | ctaagtatth  | taaaaatagc  | tgctctcttc  | 34741517 |
| acaataggaa  | tacagtattg  | ggtthtttgag | aatthattta  | gggcataaga  | 34741567 |
| tatgatcaaa  | ggttacctct  | tgaggaagag  | aacattctct  | tctaategtc  | 34741617 |
| tgtctgtagt  | aaggaatgct  | ggcctggact  | cagccagcat  | gagtctcttc  | 34741667 |
| cctagatccc  | tgcagatate  | tgctccaagt  | ggctagaaga  | cattgcctac  | 34741717 |
| aatgccagag  | tccttaaagc  | aatagaatgg  | gccgatggaa  | tagacattgc  | 34741767 |
| agtcgggtggc | cacgttagcg  | ttgacatggt  | agactgaaga  | gactthgtaa  | 34741817 |
| ttccttcttg  | tctacatgtg  | ccatggaaat  | aaacttaagc  | aggttcaaat  | 34741867 |
| gagggatatt  | tcagagctgc  | ggtaggtaca  | taagaagggg  | gtgtccatgg  | 34741917 |
| ttatgagagc  | ccctcagggg  | tcctctaattg | gctccaccag  | tgthcctatt  | 34741967 |
| agaacagaca  | taggacaaaag | actccataaa  | agacagagct  | gcaagtctga  | 34742017 |
| ggctaaggat  | ctgggtgattg | aagaaggaag  | gatggthttc  | taacatctth  | 34742067 |
| gtgcagagag  | aagtagaagc  | tcttagtggt  | gtagctctta  | gccagtgtct  | 34742117 |
| caggggaaaag | atccatthtc  | thtgtcacia  | tgaggagagt  | tgcatgtgct  | 34742167 |
| atctgcttgt  | tgcatggcca  | gagtcactta  | agtgaagtcc  | atcaggagac  | 34742217 |
| tgcgccacgt  | gcgacttgta  | gacatccctt  | gattcaagag  | gatcagccag  | 34742267 |
| tgthtgatth  | tggaaagthc  | thtaccgcca  | actacattag  | gaaactagtt  | 34742317 |
| ctthtagccat | tgaccacgaa  | ttagctaattg | atggtcacia  | gctatthtgaa | 34742367 |
| gaaaatata   | aaaggggtct  | gcaaccctat  | aggaggaaca  | acaatatgaa  | 34742417 |
| ctaaccagta  | ccccccagaa  | ctgtgtctct  | agthgcata   | gtagcagagg  | 34742467 |
| atggcctagt  | tggccatcaa  | tgggaggaga  | ggcccttggg  | cttgtgaaga  | 34742517 |
| tcatatgcc   | cagtacaggg  | gaatgccagg  | gccaggaagc  | aggagtgggt  | 34742567 |
| gggttgagga  | gtgggggttg  | gggggagggt  | atagaggatt  | ttggggatag  | 34742617 |
| catttgaaat  | gtaaatgaag  | aaaatatcta  | ataaaaataa  | ataaataaat  | 34742667 |
| tagatgthtg  | aataagtaaa  | aaaaaaagaa  | agaaagaata  | aagaaaatgt  | 34742717 |
| atatatthtat | cattcaccca  | taggtacagc  | tcagaaatgt  | tagthtatggg | 34742767 |
| tacggaaaat  | aaattatgaa  | agctthtggca | agcgaaaagt  | aaaacagcaa  | 34742817 |
| tgcatggtag  | cctgaggcag  | gagaagaaag  | gcaaagtgta  | gggacacagt  | 34742867 |
| gggaggtaaa  | gcaatcaata  | thctccagca  | aggatgaatc  | agataactga  | 34742917 |
| agthtagtta  | caagactcaa  | aaccataatg  | gcaggtgggt  | gacacatcac  | 34742967 |

|            |             |            |             |             |          |
|------------|-------------|------------|-------------|-------------|----------|
| cacctgcaac | ttcagcacga  | gggtggccac | agttccacaa  | acaaacaaaa  | 34743017 |
| caacagcaag | caatccccaa  | atgatcccgg | taaataaagt  | ccactctcaa  | 34743067 |
| gccagatctg | gtacattttg  | ttagtgggat | tcccagaaat  | tttgagctac  | 34743117 |
| aattcacaag | tagctatcct  | acacatagaa | ttgtatctga  | ggggtctttt  | 34743167 |
| ctttttcttt | ctttgtaaaa  | atgtatttgt | gtgtgcatga  | tctctctctc  | 34743217 |
| tctctctctc | tctctctctc  | tctctgtgtg | tgtgtgtgtg  | tgtgtgtgtg  | 34743267 |
| tgtgtgcaca | cacacacatg  | cctgaggaag | ccagaagaag  | gtgttggggc  | 34743317 |
| gcctggagct | ggagtccacag | atggttgtga | gctgcccaat  | gtgggtgctg  | 34743367 |
| agaactgaag | acgcttttct  | taacaaatag | gatctggcaa  | cacttgcacc  | 34743417 |
| agcacacaac | tcagcaggag  | ctctctgctc | tatgtgtgtc  | ttttccctgt  | 34743467 |
| tgttctcacc | ctacgatttg  | tagctttctc | caaacatcaa  | ggccagcatc  | 34743517 |
| tgttaccaat | tgtgatgttg  | tcatttcctt | ccttgtgtct  | aaattcatag  | 34743567 |
| tagggcagca | gaagatggac  | gagagcagag | atggttcttc  | tccatgccca  | 34743617 |
| cactttgtgg | ctggcttttc  | tgcctaggct | ctgtaggcat  | ttgaggcat   | 34743667 |
| gactatgcca | taaagccca   | ataagagatg | gaaaaatcca  | agcaggactg  | 34743717 |
| gcaagagggg | ggcagcataa  | gtcagagaaa | ttctttgctt  | ttcctagtgg  | 34743767 |
| aaatattcta | agtgctatct  | gaatttttac | acaggaagt   | ggcacatggg  | 34743817 |
| cgaggagaat | gatgtgggtg  | gtatcagcgg | ctgggagact  | aggagggcag  | 34743867 |
| gaggggtgag | gcaagcttaa  | ctggtgagta | ttaagcacia  | ctagtgggct  | 34743917 |
| ctagggtag  | attgcatagt  | agaatgacta | taaatatcag  | tagtgtacca  | 34743967 |
| ccccacaatg | caaaaaggaa  | ttaagaaaat | atctccataa  | ggaaatgatc  | 34744017 |
| cgtgggctag | agagatggct  | cagtggttaa | gagcactgac  | ttctcttcca  | 34744067 |
| gaggtcctga | gttcaattcc  | cagcaacaag | atgggtggctc | acaactatct  | 34744117 |
| gtaatgggat | ctgatgcccc  | cttctggcac | gcaggtgtac  | atgcaggtag  | 34744167 |
| agcactcatg | cataaaataa  | atgcataaat | cttttaaaaa  | tgatcgtctc  | 34744217 |
| ttaaactgag | atatgttcaa  | tctatgtaaa | caggagtcaa  | tgtattgaaa  | 34744267 |
| gattgtatca | tttttgtaac  | ttgaggcatc | tgtgaaggaa  | taaggaaaca  | 34744317 |
| gagcaagtgc | cttagtatct  | tttcctattg | ccatgataaa  | atactctcac  | 34744367 |
| aaaagcaagt | aaagagacgg  | tttgtcctgg | ctctccacac  | aagtatttag  | 34744417 |
| tccaacatgg | ccagaaagtc  | aaggcagcag | gaactcaaag  | cagctgggtcc | 34744467 |
| caaacaatcc | tggttgttat  | atccacaatc | aggaagcaga  | aggcaatggc  | 34744517 |
| tgcatgggtg | tgctcgggtc  | tgtttcttca | caaatataat  | tcataacccc  | 34744567 |
| agccagagaa | tgggtgctgc  | acacacaata | ggcagatctt  | tcacatcaat  | 34744617 |
| aaacacaacg | aagataactc  | cctacagttg | ctccagaagc  | ctgccttccc  | 34744667 |
| ctcagatggg | tttagatccc  | attaaccaat | gataacagta  | gtcatcatac  | 34744717 |
| ccggagaaaa | ttagtgttga  | tcatgaagtt | aatgataaaa  | agaacagaaa  | 34744767 |
| ggtgcttcta | aagatggggc  | tggggaagtg | gtgctttggg  | gggaaagatt  | 34744817 |
| aagaggggaa | acatctttct  | gtcaatgtat | accctcaatg  | tttacctctt  | 34744867 |
| acttttccta | tgggtcccatt | gctggagttt | ctgttcacag  | tagatagaaa  | 34744917 |
| ttatgcctgt | aaatttttta  | aagcataata | aagtgcttgt  | aaaaatattt  | 34744967 |
| gtaccagcaa | tccgagttca  | gtgtccagat | cctgtcagat  | aaacgatcaa  | 34745017 |
| agacaaatcc | acagtttaca  | ctgaaaatat | cacagagagc  | atttgggcac  | 34745067 |
| ggaaggacat | gtaagtgcaa  | caaatgcat  | tgcacaaccc  | tgctggcaac  | 34745117 |
| caaacagaaa | tgctgatacc  | tttcaagtgc | tgtctacctg  | aaaaaacct   | 34745167 |
| agcaaaatga | agttctcaaa  | caaccagtgc | aagaccagtg  | agaaggtggg  | 34745217 |
| gtgtttcctt | tgctggaagc  | attgaggggt | acctcagcct  | ccggggactc  | 34745267 |
| agactggaag | aatgttacag  | gagcaataaa | accattgatc  | cattttgcca  | 34745317 |
| agaattctgt | tttgacactg  | taacttaact | cttaacagag  | aagcggggaa  | 34745367 |

|             |             |             |             |             |          |
|-------------|-------------|-------------|-------------|-------------|----------|
| aacagccaga  | ataaagatgc  | tcagaacact  | atctctaata  | gcaaacgtgg  | 34745417 |
| aaccagcctg  | tacccagaga  | gatcattgaa  | cacatgcatc  | atcagtatgg  | 34745467 |
| cagctgttac  | ataatatatc  | acctgccccg  | catttggggg  | agctacatcc  | 34745517 |
| ataaatggta  | atgtgtaaga  | atagcaaaag  | aaagtggaaa  | gaaaataaaa  | 34745567 |
| actaggatgt  | ggttgcatag  | accaactgca  | atgtcgcgaa  | agtgccagta  | 34745617 |
| cccttattac  | atgcaattag  | tagaggcttg  | cgagtcttgt  | aagtaggact  | 34745667 |
| tgttgttggt  | ggaatctctc  | taaatggtat  | gtttttaaaa  | ttgttttagtg | 34745717 |
| acaacttacc  | tagcagagaa  | aatagggcaca | attaaaatgg  | accctgtgtg  | 34745767 |
| ctagggaggc  | tcctaggtgc  | ctattatctt  | aactgtttcc  | aattagcttg  | 34745817 |
| tccctttgcc  | ttgaagtgta  | aacagagagg  | actggcagag  | tgagcagccg  | 34745867 |
| gagacacaga  | gtggtcttac  | agctgctgtg  | tggcaggcgg  | ccacagggtc  | 34745917 |
| agagtctgga  | ggactgtgct  | agtcagtggt  | cctctactag  | tgcccagttc  | 34745967 |
| acttgactca  | tttcttagaa  | ctccctatat  | tgagacgctt  | ggtcatgtgt  | 34746017 |
| aacattcttc  | caacttcaga  | gttcactacc  | aagtttacta  | tgttggtaaa  | 34746067 |
| accacaaaag  | cgaaacactt  | gagttgagtt  | tccaaagggg  | aacaaataca  | 34746117 |
| cgtggctgcc  | atcctccatg  | tttaatttag  | gtcatagcag  | gacttttcac  | 34746167 |
| ctctgtgaag  | ccttttccag  | ctctattgtc  | ccactgcatt  | ctctgtcttt  | 34746217 |
| gtcatgtttg  | aggcaatttg  | gaatgcaatt  | atgttattaa  | cattctgtgc  | 34746267 |
| tataggaaac  | aggcttgtct  | aggcctctgc  | ctgccataga  | actgtcttat  | 34746317 |
| aatthttggag | aaatgattgc  | ccctcctaga  | tctccagtta  | ttttttaata  | 34746367 |
| gtcataattc  | actgacccta  | gggccctgga  | agagttgaaa  | ctgtatggtg  | 34746417 |
| tatthttatag | tgtgtgatat  | ttcacgtgtc  | taactthttac | atcatcgttg  | 34746467 |
| tcattcatat  | atgagctccc  | tatatagctc  | tagctggtct  | agaactthtct | 34746517 |
| atatagtcca  | gactggcctc  | aaagtcccca  | tctcctgcc   | ccagcctcct  | 34746567 |
| gagtgtctgga | tttacaggta  | tgtgtacat   | gccagtttt   | tccatgtctc  | 34746617 |
| ctthtttaggg | caggggatgc  | agcttagagg  | tggagtgtct  | tcttagcact  | 34746667 |
| cacaaagccc  | tgggctggct  | tctggcacca  | tgaacaaaca  | cgcttgtcta  | 34746717 |
| atthttgaaa  | atctgctcca  | ctcttagctc  | ctggttggtg  | cccagtagag  | 34746767 |
| agaaattact  | tctgtgtagt  | ctataggctt  | tgtaaatgct  | agthttcttgc | 34746817 |
| ctcattaatg  | ccctaccttt  | attgcaggta  | gattthtgagt | gthttgggtct | 34746867 |
| gattcacaca  | actaatgttt  | aatgggcatt  | ttctcatgag  | ccacacagtt  | 34746917 |
| aatthgttta  | gaaccagaaa  | tatctgagga  | gtgcagggtc  | gccattcgtg  | 34746967 |
| aatatggctg  | tatthgtatt  | cttcacatca  | ccttgggaac  | tgggccaat   | 34747017 |
| aatcttggcc  | aaattataag  | ggacagttgt  | ttcctthttag | caththttatt | 34747067 |
| atattatthtg | gtctgtthtg  | ttcttgggtat | cgthttccttt | atgacttatt  | 34747117 |
| ctgatcaggt  | ctcathttcta | ataatatacc  | agacacttgt  | gtggcathttt | 34747167 |
| atagtatatg  | aaatcttccc  | aacctgagaa  | taccaagtgc  | taactatctt  | 34747217 |
| tctcccattc  | ccagagctct  | ggggagacat  | aagcagaat   | aaaccaggtg  | 34747267 |
| aaacatacag  | ggagagagaa  | gggctctaag  | aacatagggc  | cttgcagaag  | 34747317 |
| ggctcaaaga  | aaagtgagac  | cagtgatcaat | cagttgctag  | taactaaatc  | 34747367 |
| aaccacactg  | tgagaggtgc  | tgctgatgaa  | gtggtgcctt  | gtgttccaaa  | 34747417 |
| tgcgagctgc  | tcagcccttc  | tgggcttatac | tcatgtgaac  | ctctgcttag  | 34747467 |
| ctcacagctt  | ggaatgcctc  | ccttcaaaaac | agccctctta  | cagttgtgtg  | 34747517 |
| atcagcctcc  | ttaccagctt  | tctccaggaa  | gcaggatcag  | ttccgtgaga  | 34747567 |
| gacaggtcat  | atggagtcaa  | cccttcctaa  | aggcathttg  | ctggggactt  | 34747617 |
| aatcctcagc  | ttacactctt  | agacactgtt  | aagaatatta  | atgatgttta  | 34747667 |
| aatthttact  | tatthatttt  | gtatatgagt  | aatctgccc   | cataagtatg  | 34747717 |
| ttcacttcgt  | gtgtgcctat  | tgttcagaaa  | tcagaaggtg  | gtgtctgatc  | 34747767 |

|            |             |            |            |             |          |
|------------|-------------|------------|------------|-------------|----------|
| ccttagaact | ggagttagaa  | accaaactca | ggttctgtgc | aagagcaaca  | 34747817 |
| agtgcTTTTA | atcatgaccc  | atctcatgat | ttattataag | gatcctctga  | 34747867 |
| cagctTTTTT | tttctcctca  | aacaaatatg | ataggagagg | gtcatttagc  | 34747917 |
| ctaattggca | actgccagac  | ctttgtactg | tgcttggtta | ctcagagtag  | 34747967 |
| gtgctgtcag | tcaactattc  | ctctctttag | caactgtcca | ggttgggtcac | 34748017 |
| agtaacctgt | ctgctttgga  | cacttcatgg | atgcctcaag | gaaacattac  | 34748067 |
| tccaattatg | aagaacactg  | caaccatggc | tgctcttaa  | gccaccgttt  | 34748117 |
| gtccttcagt | cttgtttcag  | ttgggtggg  | caagcctctg | tctgccctag  | 34748167 |
| atgaccttat | ctatcttgaa  | gctattagta | caaaggaacg | aatgccttcg  | 34748217 |
| tagtgcTTTT | acacaaaaat  | tgtgaatggg | gcttatgcaa | tgcttgtaat  | 34748267 |
| tagtgTTTTA | ttggggcttg  | tcattggtag | atctagaaac | catatgcaaa  | 34748317 |
| caaggctgtg | accgctggaa  | ctagaaactc | taccagaatc | ccaaactcct  | 34748367 |
| ctcagactat | ataaggagaa  | ctgtataatc | atgctttcac | ctttttgtgg  | 34748417 |
| tcaggctaag | aagtatcttc  | atgcatataa | ctcttcctcc | tattgttact  | 34748467 |
| acagtaggcc | ctcaaatgcc  | tctcccaata | gtcttttgcc | tacttttagtc | 34748517 |
| taccacaggt | acgggtgggat | aagctgggta | catggagaac | aaataacaac  | 34748567 |
| atctatcatg | gtaacagcag  | gaagggtgct | gaagacttca | cgagagcatc  | 34748617 |
| taggaggaga | aactgagatc  | tgagcttatg | gggagtgtgg | aagtactaag  | 34748667 |
| agggtaagag | atagtggaaa  | gctgagatga | tggtaaaaga | ctatgaagaa  | 34748717 |
| tcaaaagtgg | gagactttga  | agagctaaga | ctacaagttc | taatcatcgt  | 34748767 |
| aagagttcca | aaagagtccc  | cagtattaag | agttatgaaa | ctcccaacac  | 34748817 |
| cttcagctca | ggagctgtga  | cactcgctgc | ttggctgcct | acattcaaag  | 34748867 |
| ccagagcaat | aatcttctga  | cctgagtacc | cagaattata | tctgtgtagt  | 34748917 |
| ttggaggtat | aagctcttag  | tagagtctag | agctttctgt | ccttgggggt  | 34748967 |
| acaagcccag | tctcaaagca  | ttagggtctg | aacttccaag | actaaagggt  | 34749017 |
| aagacatact | ttcaattctc  | acctgaggaa | aagagcccca | atcacttgta  | 34749067 |
| acacctgaac | aggccctctt  | cctattgtcc | tgttacctgg | gcccatgcca  | 34749117 |
| taatccacag | tccttgcca   | ggctctggac | tttctctcta | aggcttcctt  | 34749167 |
| tagtgcTTTT | agttggatc   | tgctttcga  | gtctatcaga | gtgctatctg  | 34749217 |
| atctctttca | gatcctacct  | cttccagttg | tcctagttct | cttgtctaca  | 34749267 |
| cagattgtcc | tggagttttc  | ttgtgtagta | tacttttggg | ttcaaactat  | 34749317 |
| gttcattttg | aacttgtcac  | taaaatgaga | cagtcttatt | aaacaagtca  | 34749367 |
| ttatccaatg | ttgggttcgc  | cacagcctct | aagttggact | cctatgcatg  | 34749417 |
| gtagatgcat | tgctatgacc  | aaaaaaaaat | ctggtagagc | aatttaagag  | 34749467 |
| aagatagggg | gttgtgggtg  | tggtgggtgg | gggtgggtgg | tgttttcttg  | 34749517 |
| ttttaagtct | cagtcctatg  | tagcagagga | ggccggacat | gacaaattgg  | 34749567 |
| agcatgtacc | agttgttcac  | atgatgatga | gcaggaaaaa | taccaagtca  | 34749617 |
| gaaccagaga | tacttataac  | cttcaaaggc | ctgaccccaa | taatccactt  | 34749667 |
| ttaccagctg | tgtcccacct  | ctaaaggctc | caaaccttc  | aaaagagccc  | 34749717 |
| aacaacattg | gaatttaaac  | cattctcccc | atagcccaa  | aggcccatgg  | 34749767 |
| ccatctgaga | tgattagatt  | taattagcga | catgctacaa | tgtataatc   | 34749817 |
| cctaagaaa  | cctcaattag  | ggattgtcta | catcggtttg | gctgtgggta  | 34749867 |
| tgtctgtgtg | gaatcatctc  | aattaaggca | attggaagac | ctagcccact  | 34749917 |
| gtgggcaaca | ccattccata  | ggcaggggtg | gtgtgagggg | tagggatggg  | 34749967 |
| atcctgaact | gtagagtgt   | agaaatcaag | ctgagggctg | gtgagatggc  | 34750017 |
| tcagtgggta | agagcaccg   | actgctcttc | cagactgctc | ttctgaagg   | 34750067 |
| ctggagttca | aatcccagca  | accacatggg | ggctcacaac | catcctaacg  | 34750117 |
| agatctgact | ccctcttctg  | gagtgctctg | agacagctac | agtgaactta  | 34750167 |

|             |             |            |             |             |          |
|-------------|-------------|------------|-------------|-------------|----------|
| catataaata  | aataaatcctt | agaaaaatta | aaaaaaaaaa  | gcaaattag   | 34750217 |
| ttaaaaaaaaa | aaaaaaaaaag | aatcaagct  | gagcacaac   | aatccagagt  | 34750267 |
| gcatatatgt  | gttcatttct  | ttcttcccct | ggcatctaca  | catgtgatgt  | 34750317 |
| gtccaccgat  | taagtctctg  | ccaccttaac | ttctcggcaa  | tgataagagt  | 34750367 |
| gtcacctgga  | attgtgagct  | aaagcaaacc | ttatcttgcc  | taaggttttg  | 34750417 |
| ctttttcttt  | ctttcttctt  | ttctttcttt | ctttctttct  | ttctttcttt  | 34750467 |
| ctttctttct  | atcagattac  | tttgttacag | caacaaaaat  | gaaaattaca  | 34750517 |
| ccatctggta  | atgaaacatg  | catttagtct | atttaaacag  | ttccatagc   | 34750567 |
| tttaagatcc  | ccaacagtgt  | tcaaaagttc | aatgtctctt  | atgcaactca  | 34750617 |
| aggaaattct  | taactgtgag  | ctcctgttta | aaaaacaaaa  | caggttacat  | 34750667 |
| gattccaaca  | tactgtagca  | ccattctgaa | agagagggtc  | aaagcaatag  | 34750717 |
| caaggaaaaa  | tgaatcaaaa  | cgacattgaa | acacagcaga  | gcaaactaca  | 34750767 |
| acaaaacacc  | caaatcctat  | acctcaatgt | ccacagtgcc  | catagcatcc  | 34750817 |
| gaggcgcgatg | gtgtcatgtg  | tgggcatcag | tgggtatgtg  | tagatgtgcc  | 34750867 |
| ccaatgggtcc | tgcacctggt  | cacacatggc | ttctctgctt  | gaccatagct  | 34750917 |
| ctgtgctctg  | tgcctattgc  | tctccttgag | agacattatg  | cattcctggc  | 34750967 |
| atctccaaca  | tcttgattc   | tccactgcaa | cttaggttcc  | agcttggcag  | 34751017 |
| cctccatgca  | tagcctgctt  | agaggccttc | tgcaaggact  | tcaatcctgt  | 34751067 |
| tacacattgt  | ctggcttcag  | ataccaagcg | tgtctgataa  | ctcaagaaat  | 34751117 |
| agttgaatcc  | ctgtactcac  | tattttttat | atcaacctga  | cacaagccag  | 34751167 |
| agccatcgga  | gcctcaattg  | agaaaacact | tccataagat  | cagatgtagg  | 34751217 |
| caaatctgta  | ggacattttc  | ttaattaatg | actggtggga  | gaaggcccag  | 34751267 |
| tacattatgg  | gtggtgctgt  | ccctgggctg | gggaccctag  | aatctatgag  | 34751317 |
| aaagcagact  | gagcaggcaa  | tctgaagcaa | gccagtgaac  | agcattcctc  | 34751367 |
| catggtctct  | gtatcagctc  | ctgcttccag | attcctgcct  | tgcttgagtt  | 34751417 |
| cctgccccga  | cttcctttga  | tgatgaacta | tggtgtggaa  | atgtaaacca  | 34751467 |
| aataaatcct  | ttcatcccca  | atatcatcac | agccatagtc  | accctcacta  | 34751517 |
| agacagccct  | tggacatagc  | tgcagtggcc | tctgagtgca  | tgcatagctg  | 34751567 |
| aacttgga    | atactttcgt  | ggaaagccct | ttccagtagg  | gcaccagg    | 34751617 |
| gcatgctctt  | ctcaa       | atgct      | ttcataccct  | ggagtcttgc  | 34751667 |
| tggtcattgg  | tggggtcttg  | cagcggacca | agctttccta  | tggtcctgt   | 34751717 |
| gccagtgcc   | cagtttacct  | ttagtagtgt | ttctgcattg  | ctcctcatga  | 34751767 |
| ttttcatcat  | aaagtcagct  | ttaaggaacc | agcaataacc  | atgctacagc  | 34751817 |
| ctaaatgcta  | tgttatattt  | agattttact | caccaaataa  | attaatcatt  | 34751867 |
| acttgtaagt  | tcaacctcac  | tctaatttgc | taaataagaat | gtaaccagat  | 34751917 |
| tcttagccag  | aagagtgtcc  | cctcatgcaa | tccccgacc   | cagaccttat  | 34751967 |
| tgccatctca  | gagctgagga  | gcccagcctc | tgctgtctgc  | acttctgtcc  | 34752017 |
| accttctgtt  | ctctcaaact  | cccaacacca | gtcgcttctt  | aggtggcgct  | 34752067 |
| aacagcattc  | cgaggcttct  | ctagcctgta | gctccagact  | ttccaaatc   | 34752117 |
| cttcccacat  | atcagttcca  | aaggtccaaa | gaacctagag  | atcagatcca  | 34752167 |
| gtccaagaat  | cagctagtta  | ttttcggatt | actgtggcca  | aagtacctaa  | 34752217 |
| caaaaacct   | taaaggagga  | caggtttatc | gtttcagaag  | ttttgggtccg | 34752267 |
| tcatagtcgg  | ggtggcaggg  | cagagcagct | tagccatggc  | ggcaggctcc  | 34752317 |
| tgtgacagct  | gatcaggaag  | gagagaaagc | agacaggaac  | tggtgggtggg | 34752367 |
| gggagagaga  | tatatgcaaa  | atctaccctt | agcagcctga  | ttctccaagc  | 34752417 |
| cacgtctcat  | gtcctgaatg  | ctccacggcc | tccttaaca   | acaataacac  | 34752467 |
| aagaaattgg  | ggaccaagca  | gttaaattat | gtctggggga  | gctcagatcc  | 34752517 |
| aaaacataac  | agtaggtttt  | atgggttttc | tttggtttgt  | tttgggtgtt  | 34752567 |

|             |             |             |             |             |          |
|-------------|-------------|-------------|-------------|-------------|----------|
| taggttattt  | tgtttttttg  | attttttttt  | ttttttgaga  | cagggttttt  | 34752617 |
| ctgtatagcc  | ttggctgtcc  | tggaactcac  | tttgtagacc  | aggctgggtct | 34752667 |
| cgaactcaaa  | aatctgcctg  | cctctgcctc  | ccaagagctg  | ggattaaagg  | 34752717 |
| cgtgcgccac  | caccgcccag  | cggttatttt  | gttttttagac | agggctctcgt | 34752767 |
| atagccaggg  | ctggccttga  | actggtcctc  | ctgtctgtcc  | cttctattgc  | 34752817 |
| taatatcaca  | gataagtacc  | accacacctg  | gcaaacagta  | gataaccagc  | 34752867 |
| gagctttggg  | taggctactc  | ttgagcaaga  | atgagcataa  | atatattaag  | 34752917 |
| acagtctggg  | gatgcacaaa  | tgctatcttt  | tcaaatgatg  | ttgtctaata  | 34752967 |
| gtttattggg  | tatcgaaggg  | tttccttgct  | tgagaccact  | ggcgaaacct  | 34753017 |
| ggaaggaggc  | ccgggctggg  | gatcagatgc  | ctgggacttg  | gtttctgtgt  | 34753067 |
| gctctgactt  | ctaggcatta  | gtttctttat  | aaaatgaggt  | cacaccagac  | 34753117 |
| aactctccta  | acccttctctg | cactaacatt  | gcataacttc  | cttagaataa  | 34753167 |
| aatatgaaca  | ggatttggag  | tcaaggcctt  | cccactctgt  | tggcatgctg  | 34753217 |
| tccacttgcc  | cccatttccc  | cccacagtgc  | ttcatgacag  | ctgtggcact  | 34753267 |
| ctgcaggctg  | gcttaggtga  | acttttgtaa  | agggatttat  | ttcagtaaac  | 34753317 |
| actagctgtg  | ggatgacatt  | tgctactttt  | ggaataaaaa  | tatggcagaa  | 34753367 |
| ccaaagggct  | gtcctttcac  | taaaggaaaa  | gccaccctc   | caacatgcat  | 34753417 |
| tccaaattct  | ctctctctct  | ttctctccct  | ctctctctct  | ctctctcatt  | 34753467 |
| ctctctctct  | cacacacaca  | cacacaattt  | acactgttac  | aatcacacat  | 34753517 |
| acacacacac  | atatactcac  | acacacagct  | acactctttt  | tttttctttt  | 34753567 |
| tctttttctt  | tttttttttt  | ttggctgggt  | tttgttggtg  | ttgttggtgt  | 34753617 |
| tgtttttttt  | ttttttttga  | gacaggggtt  | ctctgtgtag  | ccctggctat  | 34753667 |
| cctggaactc  | actctgtaga  | ccaggctggc  | ctcgaactca  | gaaatccacc  | 34753717 |
| tgctctgccc  | tcccaagtgc  | tgggattgaa  | ggcatgcgcc  | accacacctg  | 34753767 |
| actttttaca  | caactacact  | cttatgatca  | cacatatata  | cacactcata  | 34753817 |
| cacacactca  | tacacataca  | cacacacaca  | cacacacaca  | cacacacaca  | 34753867 |
| cacatgctag  | gatgctgcct  | gagaagataa  | gaaacgtaca  | gtcatgctaa  | 34753917 |
| ctctgatggg  | tcatttaggt  | ctaaattctg  | ttccctgcct  | ctactcaaga  | 34753967 |
| accttttgag  | atgaaaggta  | gttgggaaca  | atgatagaaa  | atagatgcct  | 34754017 |
| gtgacatgac  | ccctggcagt  | gatgggtgatg | agaggaatta  | accacattt   | 34754067 |
| acttttctct  | tcatttgggtg | gcctactgag  | acccttttac  | aagatgcaag  | 34754117 |
| tccccccca   | aaaaaaacca  | gtaagagtgt  | gggtgcaatt  | ctagttggtc  | 34754167 |
| aggcaggggtg | ggaccagcta  | agggatggat  | ttaaaccggc  | agcacagcat  | 34754217 |
| cccaagccta  | ggaggaagggt | atgcctgtga  | agtgtgaagc  | acttggccaa  | 34754267 |
| caagctctgg  | gaagtctggc  | agaggagtga  | aaaatgagcc  | tggagagact  | 34754317 |
| ggagccagga  | aggcaaggaa  | aataaaaatca | aatctggatc  | ctgatttaaa  | 34754367 |
| aggcattagg  | ctgaggggag  | ccaggcacct  | ggacatactt  | tccacagcct  | 34754417 |
| gtcacacagg  | gcttgcattt  | tccaccagga  | gagaagggaa  | gtggagccta  | 34754467 |
| ttagactggc  | atcccaacct  | gtggtcccta  | caaccaggtt  | gctcagcaac  | 34754517 |
| agaaaatggt  | tgacaagtgg  | agtgcactgg  | ggttggagga  | taaggacctt  | 34754567 |
| tgtctccatg  | acgtatagaa  | aggagagagg  | aggggcattt  | ctggaagagt  | 34754617 |
| ttggttccag  | ctggtgtcct  | gaaaacacaa  | ggaacccttg  | aacatgatta  | 34754667 |
| atgaattatg  | ggaggcagag  | ctcttttgta  | ataaaggccc  | acctcttcat  | 34754717 |
| ctggagtttg  | aatgaactc   | tagatacctt  | aacatgtgag  | tcattactct  | 34754767 |
| ggagataaatt | tggagaggtg  | tttctcaaag  | tggactcttt  | caggatccac  | 34754817 |
| tgagcatttc  | agaccagcca  | aggagagacc  | atgggagcac  | agatgactct  | 34754867 |
| gtaagccact  | caggtctgga  | agtcagcagc  | acactgtagg  | tatcagccac  | 34754917 |
| ccctggggga  | tcacatggca  | agcgggtgac  | ttagagtggg  | tggctgaact  | 34754967 |

|             |             |             |             |             |          |
|-------------|-------------|-------------|-------------|-------------|----------|
| tcaatgtcctt | gctttacttt  | acctctgaga  | atgatttggt  | tgctgggtcat | 34755017 |
| gtgtcatgga  | aggggacccat | ggatggctgt  | gcatgggtcaa | atcatcgctt  | 34755067 |
| agtaaactctc | cacttcttct  | gccttcacta  | tcatgccccag | ggttccccca  | 34755117 |
| tgggaatgta  | ataccacaga  | cataatcact  | gtttttatgt  | atcagagttt  | 34755167 |
| acatagatgt  | gtgtttcata  | tgtaaaaaaa  | gtaaggactt  | tttttgtttg  | 34755217 |
| ttttgtcctt  | ccttagaact  | aatttttatc  | cagatagcat  | attactgcct  | 34755267 |
| ggatttggtg  | aatgtgggga  | ctcacagagt  | gtgtttgaca  | tgtcctaggg  | 34755317 |
| agatgatggc  | cgagtgggtg  | gatgaagaaa  | tatgggctaa  | gaagagaggt  | 34755367 |
| ctgactctct  | aggagatgcg  | ggcaggagag  | ggtgacagaa  | tcaaactctc  | 34755417 |
| aagagtagca  | gtgagtaaag  | aaccctgggt  | ggggacatga  | gaggggacat  | 34755467 |
| gagagtaagg  | gggcaggaag  | ggtatgagtg  | ggggctgact  | gtccaggaag  | 34755517 |
| gtgttccag   | tctttctcag  | agacagcaga  | aggggggtact | ctgccccctc  | 34755567 |
| cctgccttac  | cccatggctc  | atagccatca  | tgtcatctgc  | aaacaggggtg | 34755617 |
| gatttccttt  | cccttacagg  | atgtgcctcc  | ttgacagcgg  | ctgggtgttg  | 34755667 |
| gagctgagaa  | tgggagacaa  | agggtccagg  | agataagaat  | aagaaaggaa  | 34755717 |
| aacaactagg  | agccagcttc  | tttctagtgg  | gagtttgggc  | atctggacca  | 34755767 |
| acaagaatat  | ttactggggg  | tctgagctga  | gaatagtgtg  | tgtggtgtgg  | 34755817 |
| tgggtggcac  | atggatgtca  | gctgaatggg  | ccaacagggg  | gcacactgct  | 34755867 |
| cttagctgcc  | tttgtcatgg  | ctctgacaaa  | atgcctgata  | aaaggtatat  | 34755917 |
| atattcatat  | atgtgtatat  | atacacatat  | gtatacatac  | acacatatgg  | 34755967 |
| aatcaacag   | tctgtagagt  | ggttcagtac  | aattttgtgg  | ttcaggcgaa  | 34756017 |
| cagtactctg  | actcgggtggc | gtcctgcttt  | tcaccctcat  | ccctcagaca  | 34756067 |
| ctggaaagac  | ccaccgtgtg  | cttatccgta  | ctttgcgaag  | ctttccatga  | 34756117 |
| aacaccgagg  | ctggaaacca  | agtaacctct  | gtgcgtcaga  | gtggcgggga  | 34756167 |
| gagtggcaag  | gattcaggct  | tcacagccag  | gtctgcgctg  | ggacttctcc  | 34756217 |
| tgattatggt  | ctctaaacct  | caggggtgtg  | atgggagtc   | tctctctgc   | 34756267 |
| ctcactgtac  | accagtgtat  | gcatagcagc  | tgtctaataa  | agcagagaca  | 34756317 |
| tcatgcgaca  | gtgaactacc  | tatggagaca  | cattcctaaa  | gtacctgaga  | 34756367 |
| ccacagattg  | gaccaaactc  | tctgtgctgt  | ttcctcctgc  | atatttatga  | 34756417 |
| ctaggtttaa  | tttgtaaatt  | agacacagtg  | gaagagccac  | agcaataaac  | 34756467 |
| tagtgataca  | gcgcaatcac  | tacagccgtg  | taccacaaca  | aaacggctctg | 34756517 |
| aacttacgat  | ttgtttattc  | ctagactttt  | ctgtttaccg  | tgtatcggat  | 34756567 |
| aaccattgac  | cacaagtatc  | taaaagcgtg  | aaaagcgaag  | cctcagataa  | 34756617 |
| gtggggactc  | ccgcagaaa   | aggagttagaa | tggccagtc   | gtccacagca  | 34756667 |
| ctcctccggc  | aatctcgaag  | aaagccttta  | agtacttaag  | ggacaccgga  | 34756717 |
| gaagggcgga  | agggcagaag  | taaaaggagg  | ctgagtttgc  | ctgcaggtct  | 34756767 |
| gcctggtcac  | agtcaccatc  | gccacttgg   | tcgatagctc  | tgccctgtat  | 34756817 |
| tgcttttctg  | agctgggtcc  | ccttttagaca | attgctgcag  | ggagtcaaac  | 34756867 |
| ttcatttttg  | cttcaacccc  | atcttccact  | gcccgggatc  | ttggggaatt  | 34756917 |
| tgcttgatta  | ctcttgaagt  | cactttcctg  | tctgtgaaga  | ggaacaatgc  | 34756967 |
| ctctgtcctg  | gcactgtgcg  | ggtagaacgg  | cacggctgca  | cctgtaagct  | 34757017 |
| agttcttgct  | ctgtggctct  | ttgtcacaag  | tcgttctactg | ctcggtatcc  | 34757067 |
| tctgttttgt  | acctgaggtg  | tcatttccca  | gagtgtctgtc | attgtgacat  | 34757117 |
| tagtggctaa  | tattctgttc  | aacatgatcc  | actgctgttt  | ggcaaatcat  | 34757167 |
| tctgggctgc  | agtcatttag  | gtggtttctg  | tagttcctcg  | tataaactga  | 34757217 |
| aggcacatgt  | acatctttag  | acataaagct  | tttaatttca  | tgtttaatat  | 34757267 |
| catttcctag  | gaattgatta  | gttggcagta  | cagaggttag  | tgggacagaa  | 34757317 |
| gacttttgtc  | tgagttcctg  | ctgaagaact  | actcttcggt  | ttacattgcc  | 34757367 |

|             |             |             |             |             |          |
|-------------|-------------|-------------|-------------|-------------|----------|
| atcagaaag   | gatgcagcgc  | cctacccggc  | ttatggtctg  | tcagctccct  | 34757417 |
| gtgagatgat  | caagtgtctc  | tcttcacaag  | tttctctcag  | cgtctgtcca  | 34757467 |
| caggctgctg  | cttctctctt  | tctgctgaac  | tgcttctgag  | ttggaccctt  | 34757517 |
| ctctacctca  | atctgcatct  | gccccctcca  | gctcagtcta  | ccaccatggc  | 34757567 |
| agtcagggtc  | tagtggggcc  | tgcgaccag   | cagttggaag  | actagatgca  | 34757617 |
| gggaccccag  | cgtgaggttt  | ctagccatag  | ccagggagga  | aggagacagg  | 34757667 |
| gtacactcac  | agtcaggtct  | cttcactctg  | gaggtcagaa  | ctccatagat  | 34757717 |
| cccagagtgg  | ggatacctat  | ggcccaacat  | aaagcctgcc  | tgtctgatcc  | 34757767 |
| atgcagagaa  | atgacaactc  | cagggcggggc | tgaggggaga  | gttaaggtgc  | 34757817 |
| aaggcagaca  | aaaggggctg  | tgattgagag  | ctatcgtcct  | aaaggtccat  | 34757867 |
| tgacttcacc  | ctgctagata  | gacttccttt  | tataaaaaaa  | aacatcattt  | 34757917 |
| gttcatgaga  | ggcaaaggcc  | atgctgtaac  | acatgaaggt  | caggggacag  | 34757967 |
| cttgtagctt  | ctctcctctc  | tttgtgtggg  | ttctggggct  | tgaactcagg  | 34758017 |
| ctgtcaggct  | ggaacagcaa  | gcacttttcc  | ctcctgagcc  | atcttgctga  | 34758067 |
| cccagggcca  | agtcattgct  | gctctttttc  | tctttccggt  | tccaaacatg  | 34758117 |
| tccccgatcc  | acactttggt  | gatttaaatac | tttccattgc  | ggtcatatcc  | 34758167 |
| ttcctcagtg  | tgtgtgtgtg  | tgtgtgtgtg  | tgtgtgtgtg  | tgtgtgtgtg  | 34758217 |
| tgttgggttt  | cttctttgtg  | ccccgacta   | ggtgcacaca  | agatgtagac  | 34758267 |
| catcccctcg  | agcagtggga  | ggagcttccc  | aagacaagta  | ccacagctgc  | 34758317 |
| cgggttgccc  | gaagaggcct  | gtgggaggta  | cagtttgtcc  | tcggtatctg  | 34758367 |
| tggattcggc  | cagctgcaaa  | ttggaaatat  | ttggaagaaa  | atggcatgtg  | 34758417 |
| tttagacaga  | ctttttcttt  | tttttaaaaa  | aaaaaaagat  | ttcttttaaa  | 34758467 |
| accatttaat  | catgtgtatg  | tgagatgcta  | tgtgcacatg  | actgcaggta  | 34758517 |
| cctgcaaagg  | ccagacacat  | ctgctcctct  | ggagctggag  | ttagaggcag  | 34758567 |
| tgctgggaac  | tgagctctga  | tcctctgtga  | gagcagcaca  | cactcttaac  | 34758617 |
| tgctgtctc   | tctagccccc  | tcgactgttt  | ttcctgccct  | tagtctctaa  | 34758667 |
| ataatactgt  | cgtgactatt  | tacatagtgt  | tataagtagg  | ctagagacc   | 34758717 |
| tcttgtgaca  | tttaacttag  | ttgttttact  | tgttaactgt  | atagtgtctg  | 34758767 |
| acattgaacc  | ttgagtatac  | taagcaagaa  | ttctgccact  | gggactggag  | 34758817 |
| agttagctca  | gcagttaaga  | gctcccactg  | ctcctgcttg  | gttctctacc  | 34758867 |
| gtcacacggc  | agatcacaac  | tctagttccg  | aggagttatt  | aatttattca  | 34758917 |
| gttaciaaaat | agggcgtggg  | gtttaacaat  | actctcaaag  | aaaaagccct  | 34758967 |
| ggggcacact  | ggtaacagac  | tttgccagaa  | gcctagaagt  | cttggccttg  | 34759017 |
| cttgttgata  | cttagagctt  | tcttgccctgc | agttctgttt  | gactccccta  | 34759067 |
| aatgaagggtg | ggctatgggtg | gaataaatct  | aaatttgggg  | atctggtaca  | 34759117 |
| aattgcttgg  | tgtctttgaa  | aaatgctata  | ggtattttct  | ttacctaaaa  | 34759167 |
| aaattagcat  | agatggggct  | ggtggggagg  | aaggggaagtg | ctgtgtgggtg | 34759217 |
| tggctttcat  | gggaccttcc  | agtcctccat  | ctttgtgcgg  | caggaggaag  | 34759267 |
| accaaccg    | ccttttagagg | ccttcactac  | actctcccct  | gacctgccaa  | 34759317 |
| agcctgtaac  | cccagcctga  | cctgctgctc  | aggaggttcc  | agagaactga  | 34759367 |
| gaagtgacag  | aaaaaacgtt  | tcttgtgcag  | ctcatgagtt  | aagagaatat  | 34759417 |
| tacttaattg  | tgggtttgat  | ggaaaacatt  | atctgaggtt  | ggtgcagatc  | 34759467 |
| ttccagagaga | tctgccagca  | acctcagaag  | tggagcctta  | ttgaaaacag  | 34759517 |
| ctgggagagg  | ctggcgccca  | gcctcccctg  | ctctccatgc  | cccagagctg  | 34759567 |
| tctcgctcgg  | ccgacagagc  | tcagctagga  | ctctgccaaa  | gggcctggca  | 34759617 |
| gctttggctg  | gggatgtgtg  | gtggctctgc  | tcagcttcag  | gctccagctc  | 34759667 |
| agaacctgag  | agcatctgac  | caggggttgg  | agttagcctc  | tccttgtatc  | 34759717 |
| catgcagatc  | cagttaacta  | agggcagact  | ctgagcaggt  | atttgggcct  | 34759767 |



|             |             |             |              |            |          |
|-------------|-------------|-------------|--------------|------------|----------|
| tctacctgat  | acctgaagga  | cttgcaggcg  | tgtactgtta   | agtcctctta | 34759817 |
| gctgtcttat  | tgagagccct  | ggctagagaa  | tgtggacata   | gccaaagccc | 34759867 |
| agcactcatg  | ttgtcccttg  | tgaagcgaca  | cactcctttg   | cagaggccct | 34759917 |
| tccagcagga  | ctgtgagctc  | athtagttaa  | atccagctgg   | tcaccagcca | 34759967 |
| tggccatctt  | agctgaatth  | ctttaatgac  | aagcacaata   | tactgctccc | 34760017 |
| tttgtctttc  | tggggaaacg  | tgcagtcaca  | acaaatcatt   | gttttaatta | 34760067 |
| ttctcttaaa  | aatgttttcc  | taaaaaaatg  | ttttcctcat   | aagtgtgcat | 34760117 |
| aatttgatth  | ccagtaagtt  | atatatthta  | atthtttagc   | aaacattcat | 34760167 |
| aaaagtaaga  | tgtttctcat  | agctthtttg  | aagatagaat   | ttataggaaa | 34760217 |
| aaaatcaatc  | cacctagaaa  | tgacagcatt  | ttatcttctt   | attatthtat | 34760267 |
| atggatggat  | gttttgcttg  | caggtctaac  | tgtgtgccat   | gtgcatgcct | 34760317 |
| ggttcccttg  | gaggccagaa  | gagggcgtca  | gattccctgg   | aactggagtt | 34760367 |
| gcagatggct  | gggagctgcc  | atgtaggtgg  | taggaactga   | acctggagcc | 34760417 |
| tctggaagga  | cagccagtgc  | tcttgactgc  | tgagcagact   | ttccagtccc | 34760467 |
| aacagcattt  | ttaataaaaag | tcaaattata  | gatattaat    | aactatagtt | 34760517 |
| gtaaaaatct  | ttatthtttag | ttattactta  | aaggatactt   | acattcctta | 34760567 |
| aaattcttca  | tgataattht  | cagaaagtht  | tttctthtat   | ttttatthta | 34760617 |
| tatgcatgag  | cattthttcct | gtgtaataca  | tacatacagt   | gccctctgat | 34760667 |
| acaagaagtg  | ggtgtcagag  | ctcctgggac  | tggcattaga   | gacagtthtg | 34760717 |
| agccaccatg  | tgggtgctgg  | gaattgaacc  | tggttcctct   | agaaaagcct | 34760767 |
| ccagtgccgt  | aactactgag  | ccatgtthtt  | agcaccaaaa   | taaatthtaa | 34760817 |
| taatggcata  | tttgtthttg  | atgtthtat   | tatthtaata   | aactatthtt | 34760867 |
| ttacatthtag | attactthttc | ctthgtthta  | ttthtgactt   | aggtgctcat | 34760917 |
| tatgtaatga  | gttcacagtc  | atcatgcctt  | agttccaaag   | ctctggaatt | 34760967 |
| acaggtgtgt  | actaccacac  | ccatcagaca  | ttagattcct   | agtaaatagt | 34761017 |
| tgatctthta  | atgaaatgag  | aacaaacaat  | accggttatc   | atgggcattg | 34761067 |
| ggaattatcc  | cagggaaatc  | tcaccaattg  | aatcattgaa   | tcacagtgag | 34761117 |
| tctgtgatag  | atattgccc   | gtgattaaga  | aagcccataa   | ggtcagcatc | 34761167 |
| actgtgttaa  | tttcatgggc  | aagaaaattg  | aggttcaagt   | gattgtcttc | 34761217 |
| accagcaag   | gtthtagaat  | ttaatthttc  | atactthttt   | aaaaataaga | 34761267 |
| attagthatt  | acttactgag  | cttagaaata  | gaaaaagaca   | aaccagata  | 34761317 |
| gaccattcaa  | agacaatcag  | aaaacataca  | taatattgag   | aagcaaggct | 34761367 |
| cacaccactg  | accttgagat  | tgtcaagtht  | acctctggca   | acataacctt | 34761417 |
| gaaagaagta  | aatactthttc | tgggaagata  | gattcctcta   | gaattggtga | 34761467 |
| ggagagtaac  | ctgagacatg  | atggagacag  | cagaagagat   | ggaaaaccca | 34761517 |
| cctcctgctc  | aagtggacga  | gggagagtct  | atgcacgcac   | ggaagccttc | 34761567 |
| agagaacaga  | ccatctcgag  | ctctgtgcag  | tgcagaaggt   | ctctgtagag | 34761617 |
| tggattgtht  | tcttcacctt  | tatgcattca  | gctctgttac   | cggcttggaa | 34761667 |
| cattaagatt  | tgtgctgtaa  | gacatthtag  | ggctatgata   | gaccggcttg | 34761717 |
| gtaagaaacc  | tctagagatg  | agatctacca  | tcttgaagtt   | gatctgcatg | 34761767 |
| tttgcctcag  | tattgttctt  | ccatgtthga  | gccatcatct   | gtcttcttag | 34761817 |
| gacccatgc   | ttctgtcctt  | tggcactctc  | ctgtgtgtag   | acttccgtac | 34761867 |
| cagagcttht  | catatagtht  | aaactgttht  | atcttctctt   | gggtgtthta | 34761917 |
| ttccaggctg  | gctaagggtg  | ctacttccat  | caactgctct   | ttatgctcat | 34761967 |
| tcagthttta  | ttgagcacag  | gaaaggaagg  | ggcttactgg   | gtgctggata | 34762017 |
| ttgtcagctc  | ctthcagaag  | gtgaggcctt  | atcttgtaga   | tctgtggcat | 34762067 |
| atataccaga  | agcattctat  | cagaagagcc  | ccattccttt   | tgcttgggca | 34762117 |
| ctgagthctg  | ttgggtgcagt | ttaagatthta | atgggtgtthta | aagctcagtc | 34762167 |

|             |             |             |            |             |          |
|-------------|-------------|-------------|------------|-------------|----------|
| cttttcacat  | gtgagttatg  | tttgggtccat | ggtgtagaac | ctcttcaaga  | 34762217 |
| ctccttcttc  | cctaattgttt | tctttgggct  | tctgtaaaag | tatcttctat  | 34762267 |
| tccacagatg  | taaattctcat | cttgggagact | tactgcccga | taagctcacc  | 34762317 |
| ctttctagtt  | ttttctgaac  | tctgggtggc  | tggttcaact | tagctgttct  | 34762367 |
| ggctcaaact  | cctctccaag  | ctgactgatt  | caaattggct | tctcttagct  | 34762417 |
| tctgactgaa  | ttgccctgct  | aggaaaaact  | gcctctgtac | tccacaaatt  | 34762467 |
| gatctcattc  | tctctctctc  | tctctctctc  | tctctctctc | tctctccctt  | 34762517 |
| tttctgggct  | gcttttacat  | aacctctctt  | ttctcatgag | agttgggtgt  | 34762567 |
| atcctatctc  | tgactcattc  | tgtcaaactc  | ttctctgatt | catcactttg  | 34762617 |
| tctctcaatt  | agggtgtaact | ttgggaaaga  | tggatgcttc | cttctacaaa  | 34762667 |
| ctttatcttc  | attgtctgtg  | attaaagctg  | tgtcctaagg | gcataatctga | 34762717 |
| attctggctg  | aatcacacag  | acttagaaaag | tctttggatg | tgatcccttg  | 34762767 |
| ccagagcagc  | catgttgctg  | gattacaatt  | cctctacagg | cttctgtccg  | 34762817 |
| tttagtacct  | tgattctgaa  | agacacattt  | gctcttagaa | gtgtgccaac  | 34762867 |
| tgtagtctg   | tgaacagcct  | tgtagtcttc  | attcatataa | tagacactgg  | 34762917 |
| tcataataca  | ttcataataa  | actcaaactc  | atcaacaaag | tgattaaaac  | 34762967 |
| atataatagaa | tcacagatct  | atcagagaaa  | ctatatgtt  | aattaaaaac  | 34763017 |
| tgtatattgg  | tagcttgcac  | aaacttgtac  | tcctaactgc | aggagactga  | 34763067 |
| agaagaaaat  | ccttgagccc  | atatctttga  | gatcagcctt | ggcaacatag  | 34763117 |
| ccaacaccct  | tctgcccaa   | gtctttccac  | ttttttttta | atttggagag  | 34763167 |
| aatgtcatat  | atgtatataa  | taaaatatga  | tcacacctac | ctctccctcc  | 34763217 |
| tttttcttaa  | gaaaagaaaa  | cacatcaaaa  | cttcttctct | tctgtctttc  | 34763267 |
| aatggtattg  | agaattggca  | atctctctct  | tctctctctt | actcttcccc  | 34763317 |
| ctccctctct  | tctttgaacc  | cctactttct  | ctttgagact | gtctcactct  | 34763367 |
| gcatcccagt  | cctgccttgg  | tctctgagta  | cccggattac | aggtgtagge  | 34763417 |
| caccacatct  | agctcgccag  | tgtcttgatg  | ggtttcacag | gtaagcacag  | 34763467 |
| cctcacgctt  | tgaaacagge  | aaggtttgtt  | agctgtgcgt | ttacaagaat  | 34763517 |
| catatgccac  | aacggaacca  | ctgaaggaga  | aacactgagg | cagtgagatt  | 34763567 |
| ctagcagtgt  | gacctgattt  | gagaaatcaa  | cacaggtatt | tttgcagtga  | 34763617 |
| cacctacacc  | aagatccata  | gatcagagag  | cgaggcatca | gacaaccatc  | 34763667 |
| tattcagtct  | agccagggtt  | tcctggccct  | gctggggact | gggagaactt  | 34763717 |
| caaaatcggg  | gtgatgcctg  | gtcccttata  | aaactcagtt | ttgtattgac  | 34763767 |
| ctgtgtccag  | tatagtagag  | taaataaaaag | cataatctgt | gtggctggca  | 34763817 |
| taagtgtttc  | ttcttggatg  | gtcacaagggt | gttctgtttt | tttttttttt  | 34763867 |
| ccttttttaa  | aaaacacctc  | gtgtttccag  | taaaatcatc | caaataatcct | 34763917 |
| tggttccagt  | attttgatgt  | tgaaacattt  | gtaactcaa  | ccccttcttg  | 34763967 |
| cacctggagg  | caaccataa   | atctctcatc  | aaataatatg | ccctgttggg  | 34764017 |
| tttttttttt  | aatggaaaat  | atggtcctgt  | gcttgcctga | ggcagagaag  | 34764067 |
| tatggaagg   | gatgtcatag  | caaatcattg  | atctggattg | tctaagccag  | 34764117 |
| gcctgattga  | aagcagtctg  | actatgatca  | aggcacactg | tttttttaa   | 34764167 |
| gatgtgatca  | ttatagggaa  | tggtgtgcat  | gctgaagacc | agagagagca  | 34764217 |
| gagaacatca  | ggccatctca  | agagagcagt  | ggctgctggg | cagtgggtgg  | 34764267 |
| acacaccttt  | aatccatcac  | ttgggaggca  | aaagcaggca | gatgcctgtg  | 34764317 |
| agttcgagac  | catcctgggc  | tatagagcta  | gttccaggac | agtcaaggat  | 34764367 |
| acacagagaa  | accatattga  | gggacagaga  | cagagacaaa | gagacagaca  | 34764417 |
| gagagacagg  | gagagaatgg  | ttctgtgctt  | gctgttggag | agagagagag  | 34764467 |
| agagagagag  | agagagagag  | agagagagag  | agagaacaat | gggcaaatga  | 34764517 |
| catgcagaaa  | gggtacactg  | gtagttttaa  | tgagacattg | tccgtaatat  | 34764567 |

|             |             |             |             |             |          |
|-------------|-------------|-------------|-------------|-------------|----------|
| gctcaggcct  | ttgatcactt  | ggtccctgat  | tggtggccct  | gtttggagag  | 34764617 |
| attatgggga  | gtcacactgt  | gatggaggaa  | gtgagtgtat  | catggggctc  | 34764667 |
| tgagagtttg  | aagcctcact  | ctgtatccag  | tgtgccccct  | gccttgtgtt  | 34764717 |
| tgctgttgaa  | gatgtgttct  | ctcggcttcc  | tgctctgttg  | ccatgggtact | 34764767 |
| cctgccatga  | gctgaaatgc  | gtctcaatag  | taagagggga  | aatctgatgt  | 34764817 |
| atgacatacc  | gatacaaact  | aagactcgtg  | agcatcccct  | tttgtagggtg | 34764867 |
| ttaggggcct  | tggcaaagga  | ggaagattgg  | gtgttatttg  | ggtcaggacg  | 34764917 |
| gtcctccatc  | actgagtgct  | tcttaagggg  | acccaatgga  | acagtcaaaa  | 34764967 |
| ctgacagttt  | tttgtcttca  | tctcatctca  | tgcatggctt  | gcatttatct  | 34765017 |
| tagtggggta  | gaccctgcag  | gtgcagcaaa  | ctcagatcca  | aagaactgag  | 34765067 |
| ggtaacagca  | gcatttggtt  | tctttctgcc  | cagaaaaaga  | aaggagtaga  | 34765117 |
| taccagcctt  | ggaaatggga  | ccctggccta  | gaccagtgct  | taagcttctg  | 34765167 |
| agatagaagt  | ggctctggaa  | taggctgtgc  | cactgtgggg  | aagaggctcc  | 34765217 |
| agggtccag   | gtatggccgt  | tccttctaag  | ccacaggatg  | gcttggttcc  | 34765267 |
| ccttaatctc  | tgaagcatga  | gttccccctt  | tgattatcgt  | agctggctct  | 34765317 |
| tgctgctttg  | tgggtccttc  | tcccccttt   | agcctgtccc  | ccagtttcat  | 34765367 |
| ccctaactct  | agataggata  | gaaaggatgg  | aggggaaaga  | gagagaaaga  | 34765417 |
| tccccaaatc  | tattttcttt  | tcttttgttt  | cttctttaat  | cacagctact  | 34765467 |
| aacaaaccac  | agccaggctc  | ccttaacaac  | caacaacat   | caccctacca  | 34765517 |
| cttctcaggg  | ccctagcatt  | tatataccct  | ctgaaaagtc  | cccagaattc  | 34765567 |
| caaaggtcac  | acaatcaaag  | gaattacctg  | cagctagaaa  | aaccctgttt  | 34765617 |
| ctgctagagc  | aggagacaga  | tcgtcgggtc  | gctgctgtgg  | acagtcctaaa | 34765667 |
| gcaaccacaca | tcccacacct  | gggattcaaa  | cgaaagcacc  | ttcttataat  | 34765717 |
| aattcttcat  | tttctaaaga  | aaccagaagg  | ccagaattct  | caaaaatctc  | 34765767 |
| cgcacacatg  | atgttggtgct | ggtactgtct  | gagtggcaag  | gctcctgggt  | 34765817 |
| aggctgttgc  | tggaatgcag  | agcttttggt  | agtcttttag  | gggtctagggt | 34765867 |
| gctctttgag  | aagccaaagg  | gcaaggcggg  | gggggaatct  | aacctgcttt  | 34765917 |
| cggctaaagt  | gtctccctgg  | ggtatagcaa  | atagggtttgt | acatcagccc  | 34765967 |
| aggctgcctt  | caaactcgtc  | gtgtttctaa  | ggatgactta  | gagcggattc  | 34766017 |
| taccgcaccc  | tcctgtatgc  | tgagatcatg  | ggcacgcacc  | accgctcctg  | 34766067 |
| gtttccacag  | tgctggagac  | tgaatgtagg  | atatcatgta  | tgctacaccc  | 34766117 |
| ccaagccctg  | aagcagtatt  | tttagccaca  | gaaaatgtaa  | actaagccac  | 34766167 |
| cttcgcaggt  | gtcaccagta  | tctgtcccaa  | ggttgggtacc | agggatccaa  | 34766217 |
| cttccttata  | aattgctttc  | ctgccagttt  | tccttcattc  | atccacgaaa  | 34766267 |
| cttaccctc   | ccccattctt  | cctcagctcc  | tcaaactgtt  | ggtaactggt  | 34766317 |
| gtatgtactt  | ggtttttggt  | tatttgatgat | actaggaaca  | aaaccagggc  | 34766367 |
| ccctgccc    | agctgagcat  | gtacttgcac  | caccgagcca  | gccccagtcg  | 34766417 |
| tatatattgtt | ttcaagggcc  | tgttaggact  | ccagaagtcc  | tgcagctaga  | 34766467 |
| actctctaag  | aagggtggcc  | caaaccctca  | cctatacaga  | agccactcgt  | 34766517 |
| gtctgcagga  | tcctccatct  | agagtaggaa  | gtgtggcttc  | catctaacag  | 34766567 |
| tggcatgtac  | aggctcctaa  | gaccggaacg  | ggaagataga  | aacgcagcct  | 34766617 |
| ttagcaagct  | gcctctgcag  | cctctgagaa  | gagacacttt  | tcaggactga  | 34766667 |
| gctgcaaagc  | tcctgccaca  | agtgcccggtg | tgtgaagagt  | ctctcagcta  | 34766717 |
| gaggttggcc  | aaaaggaaaa  | caggtgcccc  | agatcctgtg  | cccagatttt  | 34766767 |
| ggggagggca  | aggtaaccag  | ccttccagac  | agtgcctgtt  | gtggctgctg  | 34766817 |
| atgggagggc  | tgactcctct  | ggggatggca  | atgctcagag  | ccagctcact  | 34766867 |
| gggccccagc  | ccccaacagt  | gctctcccc   | ccccccccgc  | ccccatcaca  | 34766917 |
| tagttgaagg  | ggaccttggc  | gggagggggg  | cagggaggag  | ggcagaaagg  | 34766967 |

|            |            |             |             |             |          |
|------------|------------|-------------|-------------|-------------|----------|
| aaagtttgag | ttttgttttt | ctctaaataa  | atgggcagct  | ttcccctccg  | 34767017 |
| tttttccaga | tgcttcttga | gaaaagattt  | caatggcttg  | gaccgagaag  | 34767067 |
| cctaaatctg | ctttaaataa | gtgcttggaa  | cgaggactca  | cccttttggg  | 34767117 |
| gtcctgagtg | agccaccaac | aaactgagag  | aaccacccca  | gtcactttct  | 34767167 |
| caccataggc | cctggtttga | gggttggttg  | tatttgttac  | ttctttttcc  | 34767217 |
| taggtcccc  | tgggccctgc | cctaaaattc  | ctgaacaaca  | gtttatgagg  | 34767267 |
| gggctgtgcc | tgtggcactg | tgtcagcaag  | agcaatacac  | gggcttatgg  | 34767317 |
| agaacggggt | gcaaaaagta | gagcatccct  | gaggctgggc  | tgggctccct  | 34767367 |
| tgaatccacc | tgggttcacc | attctccttc  | ccagggcagg  | gctgctgagc  | 34767417 |
| acacgggatg | aaacaggcac | agcagtcaga  | gtcccctgtc  | accttctgca  | 34767467 |
| aacttgaact | cctcttcttc | caaagcctca  | gctgccaccc  | ctggctctgt  | 34767517 |
| catttctctg | tcccaggcag | cagacgctgt  | atcagaggac  | tgcctgagga  | 34767567 |
| ttcaggttta | gctcacagcc | acacttcctt  | gaacctccct  | gaccctgcct  | 34767617 |
| ccaccctcag | gaagcttctg | cagcttgctc  | tccagacttc  | cggaaacaaca | 34767667 |
| ctaactgcac | aaggtgtacc | agggtggcct  | cccagagaag  | gcttgtgggg  | 34767717 |
| cagaggaagg | caaataaaga | aaggccaagt  | tgggtctgag  | aaagttcact  | 34767767 |
| ggaaagtctt | aaaacagaag | tgattcgggt  | ctaatttcta  | tactagatac  | 34767817 |
| attgtaacat | ttggcaaaag | tgacacaatc  | tgcagcgtct  | tgaaatgata  | 34767867 |
| gagtctaggt | cttgatccgg | ttcactttct  | ccaccagggg  | aagcattaaa  | 34767917 |
| gcaagaaaac | cctgaagcgc | cacagacaat  | cagcagttga  | agggaggcct  | 34767967 |
| ttactgggga | tgaggaaaca | cacacacaca  | cacacacaca  | cacacacacg  | 34768017 |
| cacgcacgca | cgcacgcacg | cacgtacaca  | cgcagtacac  | agagagaaag  | 34768067 |
| accctctgtg | tagccaagga | ggcaccgggg  | aaaataccat  | cttttctcca  | 34768117 |
| gacctagggg | ctttaaagcc | tctgaagtgt  | tttctcctcc  | gagttaggac  | 34768167 |
| tggtcagttt | gaagaaagct | gggatggttg  | atcggcccac  | aaggcaggtg  | 34768217 |
| aaaactttg  | tagcaggcct | tgaacctgtt  | gagccagtc   | gtcagcaagc  | 34768267 |
| aagagcctgt | gatgggagac | aaagcccacg  | aggctgtttg  | tttggttttg  | 34768317 |
| ttttgagctg | caagatttct | caagtcagga  | gggtgaggca  | gaagctgacc  | 34768367 |
| atcttgga   | ttcaccacct | ttattcccca  | gccattgcc   | ttcttctctg  | 34768417 |
| ctgtttgcct | atcagggcat | ctgcctcacg  | cccagtctct  | cagcatcaca  | 34768467 |
| cctggcttgg | tctgtttgcc | tgctgatagg  | tgtatatagc  | atagaactta  | 34768517 |
| cagttttatc | catttaagta | tacagttcag  | tcacataaat  | gcagctctgct | 34768567 |
| agcccaaggg | catcccactg | gcctgctctc  | agggacctgg  | caactgccac  | 34768617 |
| caggtatgcc | aggcatgtgc | tgcagataaa  | aggcctccag  | ccaccccaga  | 34768667 |
| ttctctctct | tctctgcctt | ccctcctctc  | cctcctcctc  | ttctcctgta  | 34768717 |
| tctctctctc | ttcccctctc | ctctcctctc  | ccccttctct  | ctcctcctcc  | 34768767 |
| ctctctctcc | ctccatctcg | ttccctgtct  | ctcctctccc  | gtgccttctc  | 34768817 |
| tctgtttccc | tgtccacctg | tctgtctaca  | tatctgcctc  | tctctctctc  | 34768867 |
| cttcatgtcc | ccactccaag | acttgcaaga  | ctcccactcc  | cccttctccc  | 34768917 |
| aacaagcctc | ttacaccaga | tctgtttgcgt | ggcgtgtttt  | ctcaggcgca  | 34768967 |
| caccttggcg | tgggccacc  | aaagatccct  | gactcttcca  | tcgcattttg  | 34769017 |
| atcctgtcag | catcacacag | tatgtggcca  | ccatcagcat  | ccatctccag  | 34769067 |
| aactgttttt | gcctcataaa | actgaaactg  | tggacttatt  | aaacaacttt  | 34769117 |
| cttctccttt | ttctttcttt | ccttaattaa  | aatgggtattc | ttttctcata  | 34769167 |
| caatatatcc | tgaccacagg | ccacagttcc  | ctccctccac  | tcctcccagc  | 34769217 |
| tcctcgcccc | caccccaga  | tctactcact  | tcgtttccct  | tcagaaaaga  | 34769267 |
| acaggcctcc | aagagacagc | aaccgaacac  | ggcaaaacag  | gatacgataa  | 34769317 |
| cacacggcaa | aaaccctcat | atcgaggtgg  | gacaaaacaa  | cccaatagga  | 34769367 |

|             |             |             |            |             |          |
|-------------|-------------|-------------|------------|-------------|----------|
| agaaaaagtc  | ttgagagcag  | gcgaaagagt  | cagaggtaca | cctgctctca  | 34769417 |
| ttgttaggag  | tcccacaaaa  | acagctagct  | cacagccata | gcatatacac  | 34769467 |
| agaggacctt  | gtgtggaccc  | atacagacct  | catgcttgcc | acttcagctt  | 34769517 |
| ctgtgagctc  | atatgatccc  | cacttagttg  | agtcagtgga | ccgtgtcctc  | 34769567 |
| ctggtatctt  | ccgtccactc  | tgactccttc  | cagccccttt | tcggaggggt  | 34769617 |
| tcctggagct  | tcaaggagag  | ggacccaaat  | ggagacctcc | catctagaat  | 34769667 |
| ctcccattta  | gactctgtct  | tcacataatg  | tatggcgata | ggtctcttca  | 34769717 |
| ctcgcaccca  | tgccctgctg  | gaggaagcct  | ctctgataac | gactggataa  | 34769767 |
| ggcagccatc  | tcttagtata  | gcagaatatc  | attaggaatt | aggacttttt  | 34769817 |
| tctttttggc  | cagtttggtt  | ttatcctagg  | tctctgacta | tcaattctct  | 34769867 |
| ggtttctggc  | tatccaggca  | ggctaagctt  | aatgactcaa | gacctcacgt  | 34769917 |
| gtgtgagggc  | ctaagacaaa  | tcaaacgcag  | aggaagcaga | aggcattgcc  | 34769967 |
| tgggtgtggg  | ggaaagtgga  | gcgaagaaat  | tgatgttgat | atcttcggct  | 34770017 |
| gccatgggct  | ctctctcagg  | gtgtgaacct  | caagttaaac | tagacgttgg  | 34770067 |
| ttggccactc  | ccactagttc  | tgtgctacca  | ttgcctcagc | acatcctgcg  | 34770117 |
| agcaggacag  | actgtaggtc  | tagggttttg  | tggctgggtc | agtgtccagg  | 34770167 |
| tttgtctttc  | tgtagcctgc  | agagtaccct  | ctcacaccaa | agagaccaga  | 34770217 |
| acgtaggggt  | gaaggcccta  | tgcaggcacc  | agctcaacct | ctctgtgttc  | 34770267 |
| aatgagctgt  | agatattgtc  | cttggcaatg  | gggcctgact | atcagttttc  | 34770317 |
| agagaggacc  | ttctgtccta  | gcatcagcct  | gaattgttta | gagatctcca  | 34770367 |
| tggacctccc  | cctcagccaa  | cgattcaacc  | caatacaacc | tatctcatca  | 34770417 |
| ccggaagctt  | tgccctggcta | caaaagatgg  | ccggtgcaga | ctctgtctcc  | 34770467 |
| tccttactaa  | gagtcctcac  | tagggctcatc | ctcatagagt | ccggaaagtt  | 34770517 |
| tccactgcac  | tagattgcca  | cggtgcccc   | aatgcctcc  | aacttcagct  | 34770567 |
| gtcttctctc  | ccaccatccc  | ttctccctgc  | cctctccaac | atgatgctca  | 34770617 |
| tgggctgcaa  | agatggctca  | gccactaaag  | gctagctaga | ctccagctga  | 34770667 |
| agatataaac  | accaattttc  | tagctcccct  | tcccccaac  | accaggcaat  | 34770717 |
| gctgttctgc  | tctgtgctgc  | ttgatttgtc  | ttaggccctc | gcacacatga  | 34770767 |
| ggtcttgagt  | cattaagctt  | tgcagtgact  | gtccattttc | actcgctata  | 34770817 |
| atgtcttcag  | gctaaccctt  | gttgtagcat  | gtgtctgaat | tctctttttt  | 34770867 |
| atggatgaaa  | atctttgctt  | ccccggttat  | ctattgatag | atacttgagt  | 34770917 |
| tgctttctct  | atthttgaatg | ttattataag  | tatgggcata | aattgacgtc  | 34770967 |
| cttacttcca  | gttttcttga  | gtatttatcc  | caaagtggaa | ttactggctc  | 34771017 |
| atatcataat  | tttaggtttc  | aatthttttta | gatttatttt | atthttatgtg | 34771067 |
| tatgagtgtt  | tcatctacat  | gtatgtttat  | gtgcccgag  | agttcagaag  | 34771117 |
| agggtgtcag  | atccctggaa  | ctggagttac  | agacagttgt | gagttgcatg  | 34771167 |
| tcttcgctgg  | ggatgaactt  | gggtccacta  | ccagagcaac | aagtgccctt  | 34771217 |
| aaccactgag  | ccatctccct  | gagtcctgtg  | tccccagatc | tactggttga  | 34771267 |
| agaatgatga  | tggctctctgt | gtggttcaga  | gagcagctct | ctgctccacc  | 34771317 |
| catcccttgt  | gccagtgggtg | tacatccctt  | tctctggact | caccatgact  | 34771367 |
| ggttagaaaag | gcagatttgt  | tagcccagat  | acttccttcc | caacccttgc  | 34771417 |
| ctgtggccat  | tcaaattcca  | gtgtagcact  | agtcagtgaa | gcagaaagtc  | 34771467 |
| aagatactcc  | ctatctcaaa  | atggcattgt  | ggtattccgc | aaagggaaat  | 34771517 |
| atgggtgtgg  | aaaatgacag  | gtcggatatt  | tgttttcaaa | tgtgctttgc  | 34771567 |
| catgctacat  | aaaaaaataa  | tggtcacttt  | ttaaatttgg | tttcattgtt  | 34771617 |
| tagataaaaa  | taacaaacta  | cttcaccag   | aacaacaaaa | aaaatgttct  | 34771667 |
| tagttaaagt  | gttaggtttt  | tgcctaatta  | agagtccaaa | cccacatact  | 34771717 |
| gaggcacacc  | ctcccaatga  | caaaataaac  | caaaacaaca | acaaaagaaa  | 34771767 |

|             |             |             |             |             |          |
|-------------|-------------|-------------|-------------|-------------|----------|
| aaccatacac  | caactctctg  | gacctacagg  | acagctcagc  | aggtaactaa  | 34771817 |
| ctgtcttgct  | gacaagcctg  | gcaatttggg  | ttcaatcctc  | aggacccaca  | 34771867 |
| tggtggaaga  | actgaccaac  | caccacttgc  | ccaccatgac  | atgagtctag  | 34771917 |
| ccacacacat  | gcacatacac  | aaggattttt  | taaaaaagta  | taaattctct  | 34771967 |
| aagttgggta  | taaaaatatg  | agttgtaact  | gagaatagtg  | gttcatgctt  | 34772017 |
| taatctcaga  | aggaggcaga  | ggcacgtggg  | tctttgtgag  | ttctagtcca  | 34772067 |
| gtctgggtcta | tgtataaagg  | ccaggggctat | tgagactggc  | tggggcacat  | 34772117 |
| agaggtaccc  | tgtcttaaag  | aaaaacaaaa  | aactcacata  | cacacacaca  | 34772167 |
| cacatgagct  | ttttacatgg  | ggcacactta  | agctcacaag  | tgtttgtaat  | 34772217 |
| tcttatagca  | aaagtagttt  | catactatta  | gaactctggg  | gttgtatatg  | 34772267 |
| aattctagga  | taacttatga  | agaattactg  | acattgaaga  | agagaggggtg | 34772317 |
| gatgcaaaat  | cttggaatct  | gttaatgaga  | tgtttcacat  | gtgccatctg  | 34772367 |
| attggatcct  | atactctctg  | gtggaaatgg  | attccaacat  | cttacagatg  | 34772417 |
| ggtagactga  | gggctaagga  | agctaagctg  | cttgcccaca  | gtcaggcagc  | 34772467 |
| tggtgattaa  | tgcagcctga  | acctacatac  | catgcgctgg  | gtcacaccgt  | 34772517 |
| agtctgggtg  | gtctgattcc  | agagcctaca  | tgtcttcctg  | aattagtagg  | 34772567 |
| gattcttggt  | tatgggtgac  | agacaccagt  | cctagagtg   | ttcagcaggg  | 34772617 |
| gagatgtttc  | atattgcttc  | ctataactga  | gtatatccaa  | agctaccaca  | 34772667 |
| gtccaccca   | gctgtcactt  | cattgctgct  | tttcactgta  | tacatgagtt  | 34772717 |
| ctcgtattta  | aacttgggtc  | ttccttccat  | caggaaagtg  | agaggtaggg  | 34772767 |
| gagggagtgg  | gagagagtgg  | cttcagacca  | tttcaggttc  | agcctgggtca | 34772817 |
| gttttggtct  | cctgaggttc  | agaagtgcaa  | ttgccggggg  | ccggggggcgg | 34772867 |
| ggggggggga  | agcaciaaacc | ggctggcttt  | gattgtatgt  | gtgcccaatg  | 34772917 |
| tttgaacca   | agccttttgg  | ccatattggc  | ttcccctcta  | gactccccgg  | 34772967 |
| cagtcaggag  | agaaaatgcc  | cctaagaagg  | gacatgctgc  | tgaccctgga  | 34773017 |
| aaggtgggca  | gaagagcctt  | cttttggcag  | aagaccaaag  | caaaccaca   | 34773067 |
| caaagcctt   | ggtttcttta  | acgtcttgag  | cgctgcgtgc  | ttcttgctaa  | 34773117 |
| tatttcctat  | gactgagaac  | ctctcccaaa  | ttggtagcag  | aagtttgaga  | 34773167 |
| gccaccacag  | aacactgaca  | tcccgggctt  | gccttgtcag  | ctaaagacac  | 34773217 |
| caccattgga  | acccccgtgg  | caacaggaag  | taaggccaga  | accacaactt  | 34773267 |
| acacaggaga  | gctcaccccc  | accatcctc   | aaaagggctg  | aaattcagtc  | 34773317 |
| agactgtttg  | ttatataaaa  | gcgtggctta  | gaggacacta  | aggattatca  | 34773367 |
| gcatcgaggt  | ttcctctgta  | cactttacca  | cctggatcta  | tgctgggcat  | 34773417 |
| ttcaaggat   | gtagatgtat  | cattaaacia  | gaattaggaa  | gttaagcttg  | 34773467 |
| ttgacaaaaa  | ggagtctaaa  | gggactgcag  | tgtgacccaa  | agcctctaac  | 34773517 |
| ctatatgttg  | ccttgggttg  | tcaaagaaag  | ggagaggctt  | ggtggcacac  | 34773567 |
| gcctttgatc  | ccagcactca  | ggaggcagag  | gcaggtggat  | ctctgagctc  | 34773617 |
| ctcctggcca  | gcctgggtctt | caaagtgagt  | tccaggacag  | caagggttac  | 34773667 |
| atagagaaaag | agaaaggagt  | ccttagactt  | gtgggctcag  | aggtgcggga  | 34773717 |
| atgcctgtgt  | cctggctcac  | aagacaaaaa  | aaaaaaaaat  | ccaggacatg  | 34773767 |
| aaagtggcag  | agtaccggga  | cttgaaacac  | gtgtccctgg  | agatctactc  | 34773817 |
| ggcatccgtg  | gatgcagata  | aaggagcatt  | gccttctgat  | ggtgttcacg  | 34773867 |
| gaaaggcttc  | catcctgggtt | gggtggggat  | ggaagaatcc  | ccagtggaac  | 34773917 |
| gcgtcctaat  | tgctgtttgct | agcagctgtg  | atctcttctt  | gatacattcc  | 34773967 |
| cggttcatct  | ggggcttttg  | actgcaaggg  | gattatcctc  | agccctaatt  | 34774017 |
| aagctcctgc  | ctgacgtggg  | gtggatgcca  | gctgctgaca  | cagacttggg  | 34774067 |
| ccctgaagct  | tggatcatgcc | ttgcccttca  | cccttcactc  | ctcaccctcc  | 34774117 |
| taatacaccc  | acaagggttg  | actcacagaa  | tctgggtctga | tttgtgggga  | 34774167 |

|             |             |            |             |             |          |
|-------------|-------------|------------|-------------|-------------|----------|
| ggtgatgctt  | tgttacctgg  | gagcttatcc | tcagatggag  | aaccaggac   | 34774217 |
| tcccaccaag  | aacagagtct  | tcttccacca | attctgcaac  | gccattgcct  | 34774267 |
| ttatttgтта  | ttatattata  | tatgtattat | taaaaaaaaac | ttttgtttct  | 34774317 |
| aagccaggat  | ctcacctggт  | acccaagttg | tgagcctcct  | gcctcagtgс  | 34774367 |
| tggaattata  | ggcatggatc  | atcatgcccc | gctttatgcc  | ctattctcca  | 34774417 |
| gtatcacca   | gctctgttct  | agtctctgac | cacagcatac  | ttcatgtgтt  | 34774467 |
| agaaacatgg  | gttcttagac  | ctggtggcac | agacatataa  | tcctagttac  | 34774517 |
| ttggggagtct | gggcccaggaa | gagtacaagt | tcaaggcctt  | cttaggctac  | 34774567 |
| agagttgagt  | tcgagggcca  | tcttggcaat | taggtgagac  | cttgattttgt | 34774617 |
| caaaataata  | aaggagtgga  | gatagagatg | tctttgтааg  | agaatgagga  | 34774667 |
| gctcagagca  | cagagccaca  | ggcagaaaag | aagccatatt  | ggaaaacatg  | 34774717 |
| ttctgttttg  | aacatgacga  | aaattcccat | ggaaaagact  | ctccgtgtgg  | 34774767 |
| ctcgtcctct  | ggcctcagtc  | ttctccagca | tccatcagtc  | actgcctact  | 34774817 |
| gataacccta  | gtgagcctgg  | ctcatgactc | catctttact  | tatttgtttt  | 34774867 |
| tttgtttgтт  | tgtttgттtг  | tttttccttt | ctgtgtgcat  | cttcgtggcc  | 34774917 |
| cctagcatcc  | tgccgggсgг  | tctgттtccc | tttgгccaat  | gtgcaatcct  | 34774967 |
| ggctcctctc  | cttttgгgгct | tcctccatcc | cagattggгc  | aaaacctcag  | 34775017 |
| ttctttcгtc  | ttgcctagtc  | ctggctgaca | gtcagactgc  | tgcagctgtg  | 34775067 |
| ccctgcagct  | gтаaggгctc  | ccactgtatg | cacaggгcca  | ggccctgcca  | 34775117 |
| ggatcagaag  | acccacagag  | cctcatcatc | tttgcaaaat  | catccccac   | 34775167 |
| gcccccccc   | tttttttgct  | ttgcatgaag | ttcagagaaг  | gcagatgtgt  | 34775217 |
| ggcttagagt  | ctggggagggt | ctgtgcagta | agaaatattg  | ccaccgcact  | 34775267 |
| gggtgggaaг  | gtctgcccta  | agcaatgagg | aataggттга  | gagccccгga  | 34775317 |
| сgtgттtagga | gagacctaaг  | agtctgatgt | cctagagcat  | ggtcctcttc  | 34775367 |
| agттactgac  | tgacttccaa  | gattatatca | ggттtgagct  | gtgacacgag  | 34775417 |
| gcaggtagca  | gtgcccagca  | gcagctcttt | cctccccac   | cagccgcact  | 34775467 |
| ctcaggagcc  | ccattttctt  | taaaggcctt | ttgaggccat  | aacggттttt  | 34775517 |
| taaggacatt  | ttatggagca  | ggaacacagt | cttactattt  | aaaattatta  | 34775567 |
| tagggattat  | gagcctgcaa  | tatctttatt | tttatgacag  | ttgттgгtta  | 34775617 |
| tgcccctgat  | ttatttgata  | ctgggctcct | gttcaagaac  | acaacctcca  | 34775667 |
| attaaatgtg  | gttactgtgg  | caaaaatatg | attcctcctc  | aaaatgacc   | 34775717 |
| tctttggггc  | tggгtccaaa  | aactcattat | ggtgaaaagt  | gagggcagcc  | 34775767 |
| tctttgcatt  | catgagcatt  | cctccgacag | tcacttgctt  | ttcccatatg  | 34775817 |
| aggaattaga  | gggtagccag  | gctgtggггt | gggcctaaag  | gaaaatggag  | 34775867 |
| gtgagaggaa  | agagcttctt  | ccaagaacta | agtggггtcac | cagттaaaac  | 34775917 |
| catgctттtag | agacagaaga  | aaccctggat | acataaaгag  | taattttctc  | 34775967 |
| ttctatgata  | ggaaggaaata | acagcccaga | ggггccaaga  | agcctggcca  | 34776017 |
| gaccaggca   | ctgaggтctg  | gctgtcatac | tgctctctct  | tctccacct   | 34776067 |
| aatttcccta  | ggatgtcatg  | agctctcatg | gctctgatcc  | tgccctgctc  | 34776117 |
| tgaatacaag  | aagataacc   | gtgactccct | tcttgcatga  | cccatctttt  | 34776167 |
| gtgaaccctt  | tggagccttt  | taaaactgag | aatcagacat  | tgctttaaga  | 34776217 |
| gatggagtgt  | tctactggaa  | taggcattcc | tcaccatttt  | ggгттaactt  | 34776267 |
| aaattaggaa  | ttaccgтга   | ggтctgaaga | caacctctga  | aaccagagac  | 34776317 |
| cagaactgtg  | gtcctaaaca  | tgccacttta | tctgctatgt  | ggгттgсctg  | 34776367 |
| gcaaaccat   | tcctctactc  | tttctctagt | agtgcacttg  | gcatcatggc  | 34776417 |
| tgccatcaag  | gtccccatcc  | caggгtagct | gtcгaggгaa  | ctcttсctgg  | 34776467 |
| gaagacataa  | accaggтcac  | caaacaggca | cacaggгagag | caccaacaat  | 34776517 |
| caaccaagt   | acgactccat  | ccagcccagc | ttggagaacc  | aatgagттta  | 34776567 |

|             |             |              |             |             |          |
|-------------|-------------|--------------|-------------|-------------|----------|
| ttggcttaat  | tacagagcat  | gggttaggag   | tcactcacag  | gagcataggt  | 34776617 |
| gagcctaaag  | caatcatacc  | atcacaaact   | atcacaccag  | cctagatgaa  | 34776667 |
| atcttcccca  | tagctgcata  | gacacagtcc   | ccttcagtga  | acctttgaca  | 34776717 |
| gtccgtgcac  | tctcaagacc  | accaggctac   | gtgcagctag  | gaatgaagta  | 34776767 |
| catacagatt  | gcttggaggc  | tcaataagga   | gctgctgtga  | tctcggctga  | 34776817 |
| gggtccaatg  | acccactcc   | ctcttttcta   | tgaggggggc  | tatcaacaat  | 34776867 |
| aaataagcca  | ggcttcggga  | atctcttgca   | gttggtcaca  | gatgttccag  | 34776917 |
| tgaagacgac  | agctgtggtg  | ctcggatgag   | agtattctcc  | aacctgagat  | 34776967 |
| ccctccctca  | tagtgccgag  | agtcaggctt   | ctctgagaac  | tagacatgtg  | 34777017 |
| tgggtgttca  | tcagcctctg  | gatagaagat   | cctagccact  | gaaatccac   | 34777067 |
| cagtcgcttc  | ttaattaaag  | gctgttcata   | gatcccaaga  | atgtgaacca  | 34777117 |
| agacttccca  | ccttctctac  | ttggacccca   | gcatagtgaa  | caggcagtga  | 34777167 |
| taaaagcaac  | atcctgaaac  | ctctctaaca   | tctttactga  | tgttagagag  | 34777217 |
| cacttgatga  | gctctcacag  | tggtaggcga   | cacgttcacc  | ttgcagatca  | 34777267 |
| ttcagacctt  | gggactcagc  | aagttcacag   | aggccccgcc  | tttgctttag  | 34777317 |
| atccgggagc  | tatgaaagcc  | ttgtttgtac   | actttgactt  | tcttaactaa  | 34777367 |
| tgccagggtc  | agcatactta  | gaacgcgctg   | aatagttatt  | ctaataaggc  | 34777417 |
| atctcagaag  | taactttgga  | atatgtgtag   | acaatgagga  | gaatagagaa  | 34777467 |
| aaagaccag   | agagcatgtc  | cctgagatct   | ggaccacttt  | cagtgtacc   | 34777517 |
| agttaaacad  | tgataccccc  | agcggcctgc   | tgacgggggc  | caccgtgcag  | 34777567 |
| gctgctggaa  | tgtctggaag  | tcgtaggtgc   | tgtaaatcat  | ttctctcctc  | 34777617 |
| ctgcttgag   | ggctgagcct  | ctatgctctg   | aggttgacag  | gaagcctggg  | 34777667 |
| atcatcttca  | ggaagggtgg  | ctagctctgc   | cttacagagt  | tctggagaag  | 34777717 |
| agaaatgtgg  | tttggaaatc  | tcatatgagc   | agccacacaa  | gagctccctt  | 34777767 |
| gcttgggtctc | tgaaaacctg  | aggagactgt   | tttaacagga  | tacatgctgt  | 34777817 |
| ctgggtgcttc | tttgtatgag  | tgtgtgacaa   | aattaaagcc  | ataggatgac  | 34777867 |
| aagatthttat | atgggatcat  | gatacgggccc  | atctthtaaat | gcacataatg  | 34777917 |
| gttatthttgt | tagctctthtt | attcaaaaat   | aataataaat  | gagtggctat  | 34777967 |
| atatccatta  | gagaagcatg  | aatggaagaa   | gtacatthtt  | atthttcttct | 34778017 |
| gtthtaacaaa | gactaagtgt  | gtgacatthtc  | tagaaatatc  | acacgtgaac  | 34778067 |
| ggthttactaa | aaaggaacga  | gagagagtcc   | catatcagta  | ctggcccaga  | 34778117 |
| gacgtgcatg  | gtcacactca  | gtthttctgta  | acaatagtga  | aggttcgtat  | 34778167 |
| accaggtgg   | atatactcac  | cttcactctg   | tcaacctaa   | gtaggaaata  | 34778217 |
| gttgcctgtgg | taggaccata  | gcggcttcag   | gcattgctga  | caagthttgg  | 34778267 |
| aggagacaac  | tgaagcattt  | ctthgtgggt   | aatthgtctc  | tgtcatgagt  | 34778317 |
| ctgatthtaga | thtttacagg  | aaggagctth   | thttgtthgtt | tatgggaatt  | 34778367 |
| acaaataaga  | tgagtaacac  | tgacttggtg   | thttggggctt | thttctctcc  | 34778417 |
| atthcaatcct | gactctacat  | tagcagggtc   | ggagaggccg  | gtcatgtaag  | 34778467 |
| atthtataaac | tgctgctgaa  | gggatgattg   | tatgaattaa  | tcaaaggatt  | 34778517 |
| gttgtthggct | thgggctthtt | taactgagac   | tcaaagcttc  | cttcttagg   | 34778567 |
| aacaaaaatc  | tacatcttag  | atactcagac   | thgggtctga  | agatgctggg  | 34778617 |
| accggaagag  | ctgaggagac  | ttgaccacgt   | gcaggccgtg  | atgaggtthg  | 34778667 |
| ggtgggtccc  | caacatcaca  | gaaagtaaag   | gacaactcct  | gctgctaaaa  | 34778717 |
| acactgagcc  | ccttctthtag | tgtgctaggg   | aaggagagac  | atgtgggtcc  | 34778767 |
| cagcagttca  | aacacacaaa  | acccctgata   | gccgtatatc  | atcgctacct  | 34778817 |
| gacctthgtga | ggaagagggga | gagctataga   | gtatatgtgt  | gttgggacgg  | 34778867 |
| ggagggctag  | gctgcagatt  | thtagthttcat | thttccagaa  | gccatcctth  | 34778917 |
| ctthgcctthg | actggctgccc | thggataaaa   | ctthgtgctgc | aatctthttct | 34778967 |



|             |            |             |             |            |          |
|-------------|------------|-------------|-------------|------------|----------|
| aacaaaagca  | ggttcctcct | aaggaggctc  | ccatactgtg  | cttgtgtgtt | 34779017 |
| tcccaatgca  | caaatttacc | tattctgcgg  | cctcagtgaa  | atgggtaag  | 34779067 |
| ccctgctcct  | ctgaggacag | gtccaccttg  | aggggccatt  | gagtcccagg | 34779117 |
| tgttcaagg   | cacttacaga | attttcatat  | ctggaactca  | agcagaattt | 34779167 |
| ttataaattt  | tatattctct | ctctctctct  | ctctctctct  | ctctctctct | 34779217 |
| cgtgtgtgt   | gtgtgtgtgt | gtgtgtgtgt  | gtgtgtgtgt  | gtgtgtgtgt | 34779267 |
| gtgtatgaga  | ttcatatgtg | aacagagggtg | cttaaagagt  | caagaacaag | 34779317 |
| gccttgatc   | cccaaaggta | gcattacagg  | aggtaatggc  | cttcctgaca | 34779367 |
| tggctgggaa  | ccaaatttgt | gttctctaca  | agaacaattc  | atgtttctaa | 34779417 |
| ctgctgagtc  | atctttctaa | cccctcaatg  | ggaattcttt  | ttttttattt | 34779467 |
| ttttattttt  | tggtttttcg | agacagggtt  | tctctgtgta  | gtcctggctg | 34779517 |
| tcctggaact  | cactctgtag | accaggctgg  | cctcgaactc  | agaaatccac | 34779567 |
| ctgcctctgc  | ttcccaagtg | ctgggattaa  | agggtgtacac | caccacacct | 34779617 |
| ggctactcaa  | tgggaattct | tagattgggg  | ttttctctgc  | ctctctctct | 34779667 |
| ctctctctct  | ctctctctct | ctctctctct  | ctctctcgat  | agctttactc | 34779717 |
| tctgaataag  | attctctgaa | gcttggatgt  | gtcaaggact  | tggaaaagta | 34779767 |
| gtgaacatct  | gggagcactc | acagacaccc  | ttaagtattg  | ctagaggcag | 34779817 |
| agagctgggtg | cagagctcaa | agtgccacag  | gaggcatttg  | taagggggca | 34779867 |
| tcctttccag  | aagccacagg | aaagctgcag  | agagaaacag  | gttggaattc | 34779917 |
| atcttaatgc  | atcttcatga | cttattgtca  | aaatataaga  | aagtattact | 34779967 |
| ttcccagcat  | gtagtcaata | tagtttaata  | ttgagggttt  | tggtgcttgt | 34780017 |
| ttttgttttt  | ggtgaagagg | gattcgtaca  | gagcctcact  | tggcccaagg | 34780067 |
| ttgaattttc  | cgtgtagctg | aagatcggtc  | accttgagcc  | cccgatcttc | 34780117 |
| ctgtccacct  | cccaaggctc | gcagtcacaa  | gtgtgtgtca  | cagggctcaa | 34780167 |
| attactgagg  | tctttttttt | tccttttttc  | cttttttttg  | tgaccagtg  | 34780217 |
| tgtaatgcac  | agaaagtgtg | aactctgaac  | tctactacac  | atcgtagtga | 34780267 |
| gtgcgtatga  | aacagaagtc | cttacggttt  | cttttccttg  | tagTCCGGG  | 34780317 |
| GCTACCCAGA  | GCCCCAGGTG | ACATGGCACA  | GAAAAGGGCA  | AGCCATCACC | 34780367 |
| AATGGTGGCC  | GCTTCCTGCT | GGACTGTGGA  | GTGCGGGGGA  | CTTTTAGTCT | 34780417 |
| TGTCATCCAC  | ACTGTCCGCG | AGGAGGACAA  | GGGCAAATAC  | ACCTGTGAAG | 34780467 |
| CTAGCAATGG  | CAGTGGCGCC | CGCCAGGTGA  | CCGTGGAGCT  | GACTGTGGAA | 34780517 |
| Ggtgagtc    | atggggcact | gctgcaggag  | ctgagctgcc  | agctccagag | 34780567 |
| tctcctgctg  | cacttcagcc | ctctctcaaa  | gatggaggga  | cttagaagag | 34780617 |
| aagccgcacc  | ctgtttgagg | ctttggaccg  | tcctgactca  | tattccagct | 34780667 |
| ttggcatgac  | tcacatcaca | ccaagagtac  | aaacagacct  | tacatagggg | 34780717 |
| tgcatggccc  | atccccacc  | ctcctcacct  | gtcacccac   | tgtggccaag | 34780767 |
| ccttgccaca  | ttgacaaga  | cctcgggatt  | tcaccctgtc  | acttgcccaa | 34780817 |
| agaagagctc  | ttgccttggc | ccttcaacta  | gctcacactc  | atgtgagctt | 34780867 |
| caggcctctg  | ctcaaggatc | cccaacttaa  | agaacccctt  | tttaaccctt | 34780917 |
| cagctttcaa  | ctccccttcc | tgtaaagtgt  | ctcacagttt  | tcctctaagg | 34780967 |
| cttgccaccc  | tctcacccat | tgcacaggct  | ctgagacata  | gggtcaccat | 34781017 |
| cttgtctatt  | actatttctt | aagcatctgg  | aatgttctct  | gcacaggtga | 34781067 |
| ataccaaatg  | tttgggaaat | gactagaaag  | gacttaatca  | tcgttagcat | 34781117 |
| tgccatgaag  | taatagtgtc | tactataaaa  | aatatttaac  | agaaaaaaag | 34781167 |
| ttattaatt   | aatacatggt | cagttgtctc  | ccccccccc   | acttctgtga | 34781217 |
| ttaaaataat  | ttactaactt | tcaagcatct  | gggagacaca  | tttgactata | 34781267 |
| aataatacca  | gggtttgtca | ctggtgcatc  | ttcctggcag  | gctgaagctg | 34781317 |
| ctctgatggg  | ttcaggccac | tgacagagac  | tcagggtctg  | atgtctggaa | 34781367 |

|             |             |             |             |             |          |
|-------------|-------------|-------------|-------------|-------------|----------|
| agagaagggg  | tcagccaacc  | cctcggatgt  | aagcatgctt  | tcccagaccc  | 34781417 |
| ttctaggcct  | ttctgggagc  | tgataagcaa  | ggtagacaga  | cttgctcctt  | 34781467 |
| ctttatttgt  | tgttttgttt  | gtgtgtttgt  | ttgttttttag | aagactgtac  | 34781517 |
| tcctaatactc | at ttgcaaga | gaccctgtga  | gcaatataga  | tagccagtta  | 34781567 |
| aggccgcctt  | ggaaagt tct | agaagggatt  | cggtgcactt  | gggacagtgg  | 34781617 |
| ccactccgtg  | accctttttc  | cctgttttccc | cacacagttg  | caggcacaca  | 34781667 |
| agttctgctg  | agcagagtgt  | acatagtttg  | gatgctttcc  | tcaaattcctt | 34781717 |
| taactaagcg  | actcagtcac  | ttagtgcact  | tcaagtgcct  | gtggcaggag  | 34781767 |
| cgttctggac  | acaggggtggc | ttctggtcag  | aggtctcagg  | ataagcttcc  | 34781817 |
| caggagtcat  | tctgatgtgg  | tgcgctctct  | gtactaactg  | atcacacagc  | 34781867 |
| ctaaacttgg  | aatattgagg  | cccttgaaca  | aaaattacc   | tgcttccttt  | 34781917 |
| tctgatttcc  | tgtttgagc   | tgagagtggg  | gaggtgctga  | gttatgagtc  | 34781967 |
| acgggtccaaa | gtcctgatcc  | caacatttgc  | caacatagtg  | tgagacgcga  | 34782017 |
| aacctctgaa  | ccttggcttc  | tgcagaaaac  | ggatgtgaat  | tccaagcttt  | 34782067 |
| gcagcctggc  | ttggccctta  | ttctctatga  | tccatattaa  | ggaagactgg  | 34782117 |
| ggtgtgttgg  | gaatgcaggg  | aaattatata  | aaccagacac  | actcaggtgt  | 34782167 |
| ggtgggttgg  | gcatgccttt  | catctcagca  | ctcaggaggc  | agacacagat  | 34782217 |
| agatctctga  | gttcaaggct  | agcctggctc  | acataaaaact | gagataactt  | 34782267 |
| gtgaactttc  | tccttgggtc  | ctactgttca  | ggaagtgtga  | tctgatggct  | 34782317 |
| caatccagag  | agaacatttt  | catgtcagaa  | gcaaggaggt  | gggacaacta  | 34782367 |
| tagaagagca  | agataagggt  | cacgttcctc  | ctcttttggg  | gggttttaat  | 34782417 |
| tgggataaat  | tggctcaggc  | at ttaagatg | tgttgtgctt  | ctaactacgg  | 34782467 |
| gaaaatggtc  | tcatgcctgc  | agcctctctc  | tgtgtgaatg  | ggcctgcgtg  | 34782517 |
| catcccactt  | ctgtttgagc  | tgatgtgttt  | ggggccacct  | taagccccat  | 34782567 |
| aggcctagat  | gatgtattca  | tcatccatta  | ccatggagat  | gctgtcaact  | 34782617 |
| ccgcgccatg  | ttagcatcga  | cattcacaaa  | gcgactccag  | cagccagccc  | 34782667 |
| actggcctcc  | tgtgcagctc  | tgggctgggc  | atcccactgt  | gttcatecct  | 34782717 |
| gaacagaaca  | gaggtcctgg  | gatgaaacgt  | ttgactgaga  | ggtggaaact  | 34782767 |
| tttaaccttt  | agaggcaggg  | ttgtgcagtg  | agtggagtca  | gatgccctgg  | 34782817 |
| ttgagtttta  | gctctgttgc  | ttttacaagt  | gtgagcacat  | ggccttcctg  | 34782867 |
| agacttcctt  | tcctttaaagg | cagagggcga  | cacacagagt  | ggtgcatgga  | 34782917 |
| tcagcccagc  | ccctggccat  | caggaagtgg  | tgccagtggt  | ttttcttgag  | 34782967 |
| cggcaactaa  | catccttaga  | atacttacag  | agggaggtcc  | gtgagaaaga  | 34783017 |
| aggctttcct  | gccaacttc   | tagtttgga   | attagagcca  | agaagcgtaa  | 34783067 |
| gaacaggtgc  | ctcgggacag  | gaccacacag  | gtacccaagc  | cccacaccgg  | 34783117 |
| ggaagcagcc  | atgctctaag  | cacctctaag  | ttagtgaagt  | ttagggcaga  | 34783167 |
| gcaaaatcct  | gagggagctt  | cctccctagt  | acaggggctg  | caggctgttc  | 34783217 |
| tccaggggtca | ctatccagta  | gtgacgtaac  | atgagctgta  | catgtgacct  | 34783267 |
| taggtttgct  | agagccacac  | ttttaaagtt  | aggtgtcttc  | attaggggtt  | 34783317 |
| cattgctatg  | aagagacacc  | gtgatcaagg  | caacttctat  | aaagaaaaaa  | 34783367 |
| acatttaatt  | ggtgctggct  | tatagattca  | gagatttagt  | cctttatcat  | 34783417 |
| catagcagga  | agcatggcag  | catccaggca  | gacatagtgc  | tggagaagac  | 34783467 |
| aagagttcta  | catatcgatc  | tgggggcagc  | caggagagga  | ctcttcaca   | 34783517 |
| tcaggaggag  | actgagcata  | ggagtctcaa  | agcccaccta  | cgaagtgaca  | 34783567 |
| cacctcctcc  | aacaaggcct  | cactccta    | agtgccactc  | cctgtggcca  | 34783617 |
| accattcaaa  | ccatcacatt  | aggtgagatt  | aattttaaca  | aatgtttta   | 34783667 |
| tttaactcag  | aattttat    | aatccagaat  | tcgatcatct  | cagtgtataa  | 34783717 |
| tcaacataaa  | catgataagt  | atcccctcca  | tatgacgaag  | agtctctctc  | 34783767 |

|             |             |             |            |            |          |
|-------------|-------------|-------------|------------|------------|----------|
| agcagagtta  | caggttggat  | tagtcgaatg  | taagcaccgg | tgcctccctg | 34783817 |
| gggaatcttg  | ttgacacacc  | tgtgttgatt  | gcaaggtctg | gtccacagcc | 34783867 |
| tgaatagctg  | aagttcagcc  | acccccgggt  | gtcaacaggg | cacacttggg | 34783917 |
| ggaattcaac  | tcacatggag  | gaggctagag  | tcaggcatgg | tggtgtgcac | 34783967 |
| ctgtaatccc  | agcacgtggg  | agaccacggc  | aggaggatta | agtgcaaggg | 34784017 |
| tagcttaggc  | tatatatcaa  | gatcctaact  | caaaaacaat | cacctgcagg | 34784067 |
| gcttctggaa  | gcactagctg  | acctggagca  | gcctgcccct | ctgtcttctt | 34784117 |
| ccagcccctc  | cataatctcc  | tcttccccca  | gtccctgacc | cctagtgtct | 34784167 |
| taatcagggt  | ttctattcct  | gcacaaacat  | catgaccaag | aaacaagttg | 34784217 |
| gggaggaaag  | ggtttactca  | gcttacactt  | ccacatggca | gttcatcacc | 34784267 |
| aaaggaagtc  | aggactggaa  | ctcaagcagg  | tcaggaagca | ggagctgatg | 34784317 |
| cagaggccat  | ggaggggatg  | tacttactgg  | cttgcttctt | ctgccttgct | 34784367 |
| cagcttgctt  | ccttatagaa  | atcaagacta  | ccagcccatg | gatggcacca | 34784417 |
| tccacaatgg  | gctctcccac  | cctttatcac  | taattgagaa | aatgccttac | 34784467 |
| agctggatct  | catgaaggca  | tttctctact  | taaagctcct | ttctctgtga | 34784517 |
| tccagcttgt  | gtcaagttga  | cacaagacca  | accagtacac | ctagtaatac | 34784567 |
| tgaggctgct  | gctctctgca  | catccctgta  | ccttcagggt | tctggagttc | 34784617 |
| aatttacaca  | cacacatatg  | ctcgtgcact  | ctcccatgat | gcatatgaat | 34784667 |
| gcagtgctca  | cagaagacag  | aacagtcctt  | ggatcagatt | cccggagtta | 34784717 |
| ccgctggtga  | gccacttggc  | gtgggtgcta  | ggaagctctg | caagagcagt | 34784767 |
| gtgtgagctc  | gtagccaccg  | agccttctac  | tcagcctggg | acctcctttt | 34784817 |
| ttctcccata  | tcttttagtcc | tccacctctt  | tctcctttcc | gtaaccatgg | 34784867 |
| accttcgtgg  | actttgcctt  | tccagttgct  | cataatccta | tctgctcttt | 34784917 |
| catttattat  | gcattggtga  | aaacctagac  | cttatactgt | gcataaggag | 34784967 |
| caagagaact  | acccttaaga  | cactgacttt  | cttaataatg | tatgtatata | 34785017 |
| tcaaatgggg  | gctttataga  | ctgggttaca  | ggatgcactg | caggtaggcc | 34785067 |
| agcagtggct  | agctcatgct  | gaagttagg   | aaaggctaag | acttctgtgg | 34785117 |
| ttattcaatc  | caggaggctc  | atgtctcagc  | attcccatc  | tgatgctgga | 34785167 |
| gtccttgacg  | gatgctgagg  | gctgctggtc  | ttcagtcctt | ggtggaaatc | 34785217 |
| cccacgaagc  | cagcaaggaa  | tgctgcagca  | acagaacagt | ggaagcatcc | 34785267 |
| tgtgtgggca  | ggggaagcag  | gcaaaagcag  | tttccttctt | ccatgtcctt | 34785317 |
| tatcttggct  | gccactagaa  | gatgctgccc  | ggaagtaggg | tggggcttcc | 34785367 |
| tgcttcagat  | aatacagtta  | agaatacccc  | ctcacaggga | tgcccagctc | 34785417 |
| ttcggtttta  | gtcgattcaa  | gatgcaggca  | agttgacaac | caagatcagt | 34785467 |
| tatcacagat  | tccttccttt  | tttccaagtg  | ttttattagt | ctttattaga | 34785517 |
| ccaccatctt  | tcaagacgta  | ttccccaatg  | agttgcttat | tgatgcaatg | 34785567 |
| aatctggggt  | tctgtttaa   | atgcctttcc  | tgtctgtgtg | ccgtctttgc | 34785617 |
| tggtggatgg  | ccccaaagctg | gcacctgcac  | aggaggtggc | aaagtgacta | 34785667 |
| ctacaacatc  | acaccaaacg  | agcagtgcct  | ccacattaga | gaagcatcat | 34785717 |
| ctctgatggc  | ttcccagtaa  | ttgggtgagat | tggcgctttc | tgacatatgt | 34785767 |
| ttgcaagaga  | atgctgccac  | agcgggaggc  | tctagagaga | taaactaaga | 34785817 |
| tggagtcttg  | gctcctagaa  | gacgagtcta  | aaagagatgt | ttcctctctc | 34785867 |
| ctaagtatca  | acaacttctc  | tatggagcag  | ttgcggatga | taattaagaa | 34785917 |
| atcacttgct  | ggagctggag  | aggtgactcg  | gtggctaaga | gcactgcctg | 34785967 |
| aatccattcc  | tctgttgagg  | gacatctggg  | ttctttccag | cttctggcta | 34786017 |
| ttataaataa  | ggctgctatg  | aacagaatgg  | agcatgtgtc | cttcttacca | 34786067 |
| gttggaaacat | cttttgata   | tatgccaggg  | agaggtattg | ctggatcctc | 34786117 |
| cggtagtact  | atgtccaatt  | gtctgaggaa  | ccaccagact | gatttccaga | 34786167 |

|             |            |            |            |             |          |
|-------------|------------|------------|------------|-------------|----------|
| gtggttgtag  | aagcttgcaa | tcccaccatc | aatggaggaa | tgttcctctt  | 34786217 |
| tctccacatc  | cttgccagca | tctgctgtca | cctgagtga  | tgaatacaga  | 34786267 |
| aatgtggta   | catttacaca | atggagtact | attcatctat | taaaaagaat  | 34786317 |
| gaatttatga  | aattcctagg | caaatggatg | gacctggagg | gcatcatgct  | 34786367 |
| gagtgaggta  | acccaatcac | aaaagaactc | acatgatatg | tactcactga  | 34786417 |
| taagtggata  | ttagtccaga | aacttagaat | acccaagata | caagatacaa  | 34786467 |
| tttgcaaaac  | acatgaaact | caagaagaac | caaaaccaa  | atgtggacac  | 34786517 |
| tttgcccctt  | cttagaattg | ggaacaaaac | acccatggaa | ggagttacag  | 34786567 |
| agacaaagtt  | tggagctgag | acgaaaggat | ggaccatctt | gagactgcca  | 34786617 |
| taccagcga   | tccatcccat | aatcagcctc | caaatgctga | caccattgca  | 34786667 |
| tacactagca  | agattttgct | gaaaggacc  | aatatagct  | gtctcttggt  | 34786717 |
| atgctatgcc  | ggggcctagc | aaacacagaa | gtggatgctc | acggtcaact  | 34786767 |
| attggatgga  | tcacagtgcc | cccaatggag | gagctagaga | aagtaccaa   | 34786817 |
| ggagctaaag  | gggtctgcaa | ccctataggt | ggaacaaca  | tatgaactaa  | 34786867 |
| ccagtgccc   | ccccccccc  | ggagctcatg | tctctagctg | catatgtatc  | 34786917 |
| agaagatggc  | ctagttggcc | atcattggaa | agcgaggccc | ccttggctct  | 34786967 |
| gcaaacttta  | tatggctcag | tacaggggaa | cgccagggcc | aataagtggg  | 34787017 |
| agtgagttga  | taggggagtg | ggggggggag | ggtatggggg | acttttggga  | 34787067 |
| tagcattgga  | aatgtaaatg | aagaaaatac | ctaattaaa  | aaaaaaaaa   | 34787117 |
| aagagcactg  | cctgttcttc | cagacagatc | tgaacccct  | tgtggtctcc  | 34787167 |
| tagggtagctg | catacatagg | catgcatgca | aaacacccat | ccatgtaaat  | 34787217 |
| aataatcatt  | taaaattttt | gttcaaagaa | atcacttgca | ggaactattt  | 34787267 |
| agctagtccc  | cttctgtgat | aagcctcatg | cccttactcc | taagctcctt  | 34787317 |
| gcccattccat | ggatgactag | gaaatacgtt | ttcctccaaa | cagtgtgtat  | 34787367 |
| tctatttcaa  | tcccctgagg | aagaattggt | cagtgtttca | attttttaga  | 34787417 |
| gcctcataca  | gaatccttga | agtttctgga | tccatggatg | actttggcct  | 34787467 |
| ccatggagga  | atgtatgcac | tagtaagcat | cacagcgtag | gagcagtgtg  | 34787517 |
| tgtgtgtgtg  | tgtgtgtgtg | tgtgtgtatg | tgtgtgtgtt | ccagcaaaaa  | 34787567 |
| gtgcactata  | ttaagtatgg | aagagactga | acagatacaa | tacaatacaa  | 34787617 |
| tacaatacaa  | tacaatacaa | tacaatacaa | tacaattcac | aatagggaag  | 34787667 |
| agattgtaca  | gggaaaaatt | ccatttgtac | cacaacagga | atcccttggc  | 34787717 |
| agaggtagctt | taatatttat | agttaagacc | tgcacaggac | catgaagatt  | 34787767 |
| tgaaactgac  | aggtgacaat | ctatatattc | ttttaagta  | gaacagctgg  | 34787817 |
| gcaacctcag  | ccatcctcaa | atacccccca | tccctacatc | aggtgtcacc  | 34787867 |
| aggccctggt  | atgtcatctc | ctacacagtt | ctttcctttc | cattcccagt  | 34787917 |
| ggcactgtct  | gggtcctagc | tgctatcatg | atcacccgcc | tgtcacaana  | 34787967 |
| aagaattccc  | aatggtcacc | ttctctatct | tgtcctcact | ccagagtcca  | 34788017 |
| caccactatc  | taaaatacct | ataaaaatgt | atacccgatg | ttatcacctt  | 34788067 |
| ctccctttta  | atcctcccat | gagtcgatgt | cagcaaggcc | ccatgggtgt  | 34788117 |
| ggcttggctc  | ttgtttttct | ccccggttca | cagacctagt | tctctcgggtg | 34788167 |
| cctagaactt  | tctcatggag | aacccccacc | aggctgcatc | tctccccttt  | 34788217 |
| gctccagaga  | tcccgtctg  | cttttgacct | cagcagcctt | cccttcccac  | 34788267 |
| ccttggggagc | cagttaagtg | ctttcacaag | ctctcaggag | caggccacaa  | 34788317 |
| gagacaggta  | gagtgcctaa | aagagagcag | aagggacggg | accctcttcc  | 34788367 |
| tgcaaaagcc  | cccacacaga | gcaccccacc | accctctacc | tccactcatc  | 34788417 |
| cctccccctt  | tcttaagcat | caagtgtgat | catccgccag | tagactggat  | 34788467 |
| cccagccatt  | tcgccatcac | taaagccccg | gttccaagta | ggaacagcac  | 34788517 |
| catatactgc  | aggggagagg | gaatgacatt | cacatggccc | ctcttctctt  | 34788567 |

|            |              |             |             |             |          |
|------------|--------------|-------------|-------------|-------------|----------|
| ccctgtggtc | agggaaagcctt | tccgacattt  | agtgggatag  | taccaggcca  | 34788617 |
| aagtatatgc | tccatggtaa   | gggtcgtccc  | cctcttcctt  | acagccttgc  | 34788667 |
| tagaacagtg | cttcataaat   | gttcaagcca  | gtgattctgt  | ggttctcagt  | 34788717 |
| aacaccaga  | agtttttaag   | ttgtgaaaac  | tagctaaata  | atttaagaaa  | 34788767 |
| tggccaggat | aaagagagaa   | gtcttgaagt  | tataacttaa  | aaattatcgt  | 34788817 |
| agagtttgct | ttgtgcacat   | ttttttacta  | agtgaaatgc  | agcatttgta  | 34788867 |
| catataagtg | ttgtgtgttt   | acaaacatcc  | catgtagatc  | agggaaacct  | 34788917 |
| gaaacttgat | ggggtgggaa   | ccaagagtat  | taaattaggg  | agacatgcga  | 34788967 |
| catatgcctg | cctcactggt   | gttggtgttg  | gtgggtgggg  | tgggtctcctc | 34789017 |
| ccttgtcctt | aaaagttggg   | gagctctgat  | ggatttgtga  | tctggaaggt  | 34789067 |
| gatgtagtgc | ggttagctgg   | agttacagct  | gtgggtgtgtg | ctccctccat  | 34789117 |
| tgctcgtcac | ctttctttct   | tctacaccct  | cacagagggg  | gcattgcaag  | 34789167 |
| gcatgatggg | aatttaaggc   | atagataaag  | tttctagagt  | aactttgtat  | 34789217 |
| tacttcggtc | tgtagcaaaa   | cagaattatt  | ctgacatcac  | acttgcgggt  | 34789267 |
| gtttcctctc | tgtgtgatcg   | tcccttaact  | tacctggctg  | tgtcaccttt  | 34789317 |
| taaggctatt | tatgtttttt   | tttaaataata | atatgcatgt  | tcttttatcc  | 34789367 |
| taaaacaatt | ttattttcat   | atccacctta  | ctcccccttt  | tcctgtactg  | 34789417 |
| ctcgatagta | taaattttgc   | tcattcattt  | ttaaaatcca  | agcatgcttg  | 34789467 |
| acaagttctg | caagcatctg   | atcacctcat  | tatccttcag  | tgtgtttcag  | 34789517 |
| cagaacaatt | acacactgcy   | atacagagga  | ttacggctca  | ctttctgtgc  | 34789567 |
| caccttgctt | taattaaggc   | ttacatgga   | tttctgagac  | catatacatg  | 34789617 |
| gccaattagc | tgtgaacttc   | aatccaaggt  | ggcccagggc  | atgactaaac  | 34789667 |
| acatcttatg | aaagtgggat   | ttattctaac  | aaatcggaga  | agtgctattt  | 34789717 |
| taagccttct | ataagaaaca   | ctgaagatgg  | cttaagtagg  | atgactcttt  | 34789767 |
| ctggttcacc | tggaacagcc   | agggttggct  | cttgttgcc   | tggcatgagt  | 34789817 |
| atgaaccata | tctgtttcag   | tgctaggggt  | cctgtttgcy  | tgatggatgg  | 34789867 |
| ccacgttgcc | acacgctttg   | gggagcttct  | cttctccctg  | ccaacgcaac  | 34789917 |
| tacatcactc | acttttaaat   | cagtgttctg  | tttctgttca  | ctcttcttac  | 34789967 |
| gttttgagga | aaagcacaag   | gttctctgtca | gtccctcctc  | tgttgaactt  | 34790017 |
| tcctctcctg | agaccaccg    | ccattgtctt  | taccttgtcc  | attaaacaga  | 34790067 |
| tgagtggcta | catcccttca   | gtgtgttgtc  | ctcacaaggt  | ggaccagtct  | 34790117 |
| ccaccagttc | tcttcatctc   | ctccccatt   | tccggcatgc  | taccttaatc  | 34790167 |
| tcattcccac | ttatttttcc   | atcactggct  | tacagttcta  | ccagattttt  | 34790217 |
| gtacttttgc | agggttagtt   | tcgccttatc  | tgactattta  | caacttgaat  | 34790267 |
| tcctccgac  | tctcaaataa   | atgctgtagg  | ttatcttagt  | ccagattccc  | 34790317 |
| tttgttctgt | tgtaagctct   | ctggtactaa  | ctcactactga | tgtgaacatt  | 34790367 |
| cctcagctcc | acgttcagcc   | aaccaccttt  | gtgcattgcc  | cctgaatgat  | 34790417 |
| gccgtatata | aatcaccctt   | gctctggcag  | agaaggccct  | gcaagcagca  | 34790467 |
| ttctttgttt | ttctatggga   | aatgccatcg  | ttttttactc  | gttgtgtgtt  | 34790517 |
| tcaaggaatt | tctgcctgtg   | gactaagata  | tttagctcct  | aaggattttt  | 34790567 |
| taaaattctc | aatctaattg   | ttttcaatgt  | ggtaagaaaa  | gcatatgaca  | 34790617 |
| tttacccttt | tcaccatttt   | agccaagtgt  | gccctgaagt  | gtttgtgcat  | 34790667 |
| catcagtaca | cttccagctt   | gcacagactg  | ctctcctcct  | gcaggcccca  | 34790717 |
| ccagctgcct | accaccttct   | tttccctgtg  | gatttgcccg  | ttcagaacat  | 34790767 |
| ttcttagaga | tgaagccacg   | cgatatgtac  | cctccgtgat  | aagctttctc  | 34790817 |
| cacgtcatgt | gttcttcaga   | gtctgttctt  | actgtagcgt  | ttccacactt  | 34790867 |
| cattcctgtt | tatgcctgga   | taatatttca  | ttgcatgaac  | agactatatt  | 34790917 |
| ttgtttatct | atztatgcag   | actttttttt  | aatcagacat  | tagatcagat  | 34790967 |

|             |             |            |             |             |          |
|-------------|-------------|------------|-------------|-------------|----------|
| gagtaacaca  | gtagcattgc  | taagtgctgt | gaatggatatg | tggtccgcat  | 34791017 |
| ctcagcagcc  | aggcttatgg  | atgctgcctt | tgtatggagg  | ctgtacaaga  | 34791067 |
| agctccaaca  | tgctggctgg  | atgtccctca | cttgctttct  | ccctttgttc  | 34791117 |
| agggtacggg  | tgaccacatt  | gtattccatt | tttaaaaacc  | atttcttttc  | 34791167 |
| taagttttaa  | aaaatatagc  | taatatttct | aaaagtaaaa  | tataactaaa  | 34791217 |
| ttatacatag  | ctaataattc  | tgaaagtaaa | atatacctaa  | attattgagc  | 34791267 |
| accctaccac  | cctcaaacia  | ttactattat | caatgtgtat  | ctttttgtgc  | 34791317 |
| ttcctccaac  | agcatggaag  | gagcccagca | tctatcttaa  | ctgtccatgt  | 34791367 |
| caactgggtt  | ctttcaaaac  | ctgtctctcc | tttgatgagc  | ttaaagtgtc  | 34791417 |
| ttcaacctt   | ggctagagag  | tgagttggca | gactgctcgc  | ccagtgggtca | 34791467 |
| tattggacaa  | atacatcagc  | agtgatcact | ggtccatggc  | atcccaagtt  | 34791517 |
| cagtgtggcc  | tgagcatttt  | ggtgtggctc | ctgtctcact  | gatgttctgt  | 34791567 |
| cagaatctca  | agataggtgt  | ggctagggaa | atgctaactg  | tgacgttaag  | 34791617 |
| tctctacca   | tggttccatt  | cctgtcctgt | catggaaatg  | tgatagctga  | 34791667 |
| gagagcgtaa  | ggaagtctac  | cattcccaa  | taaagtctct  | gtgcattccc  | 34791717 |
| tgacgacagc  | actctctcat  | atgagcacga | cgaccagcc   | ttccttagta  | 34791767 |
| ggctttttat  | acgcattcac  | agcttataga | agaaagagac  | caacttccag  | 34791817 |
| ggtgatggct  | ctttcctcct  | tctcctaacc | caaaaccaa   | ccactattgt  | 34791867 |
| gtagttatgt  | tactgcattg  | ttttctggtc | acattttata  | tctcctccc   | 34791917 |
| agctgcagcc  | ccccgataaa  | gggttccca  | tgtggtgtct  | ctaggtttgc  | 34791967 |
| tatactgctg  | ttcctgcct   | ggtacatcag | cagctcacc   | aggctcgggtg | 34792017 |
| gcactgggca  | tagtaacttt  | tcagctagaa | ctggcggtac  | ctagcacagc  | 34792067 |
| agcagcttgc  | cgaggcctgg  | cagtactgct | gattctggga  | ggtgtggctt  | 34792117 |
| cgcagcggct  | cactcattcc  | tgttctat   | ctgcttggtg  | ctatttgctg  | 34792167 |
| ggccttctgt  | ggaagaactg  | agcattgatt | ctgttcatcg  | taaatagata  | 34792217 |
| tggttaagaga | tgtgcatctc  | cttcctcac  | ttaagctgtg  | gcatattctg  | 34792267 |
| gaccagtcct  | ggatctctat  | agggtattct | aacaatagaa  | agtcccaaat  | 34792317 |
| actacctcac  | aactcagcta  | ggaggttgag | tattctagaa  | cttgggaggc  | 34792367 |
| ctgatgaatt  | cccaaatcat  | tttaggttct | attatttcca  | cctgtgactt  | 34792417 |
| ctctgaattt  | cattttttct  | taccactgg  | gaaaaaaaa   | agacagaaag  | 34792467 |
| agggttgggg  | agacagctca  | gctgttagga | gtatttgctg  | ttcttacaga  | 34792517 |
| ggaccaggt   | tcagtctcca  | gcacctacat | ggtgactcac  | aaccatctgc  | 34792567 |
| aactccaatt  | ctgggagatc  | caataccctc | tgatggctca  | tgtgccgttt  | 34792617 |
| gtccacagac  | accaggcatg  | cacctgatga | acataatgc   | atacaggcaa  | 34792667 |
| gcactcatac  | acacaaaata  | acaataaata | cattaaaaaa  | actttaaag   | 34792717 |
| atggaaaaat  | aatgaattac  | ctacttcatt | aaattattat  | aaggcactta  | 34792767 |
| tattccagtg  | tttgcgatgc  | attagcctgg | tgctcagagt  | cagaatgtgc  | 34792817 |
| ccattaaggt  | tcacatatag  | ctccatcttc | ccctgtagtt  | gagtctgcat  | 34792867 |
| gactcgttgc  | tgacattgggt | ggatgcaacc | tgaccctgac  | tctctagcct  | 34792917 |
| tctctctgtg  | tgttacagGG  | AATTCTATGA | AGAAGCGTGA  | TCAGCCTGTT  | 34792967 |
| CTTTCTAAAG  | CCTCAGGgta  | agttctggaa | tgctcaagcc  | agagtaaggg  | 34793017 |
| ttggattgtc  | ttttcctgct  | gacttagcac | gcataggtat  | agggcataatg | 34793067 |
| tcttacatat  | cctaggttgt  | aataactgaa | gaatgggggc  | ctagtgggtac | 34793117 |
| attgagagcc  | attccccag   | catctcctga | cctggaagcc  | tctgtggcta  | 34793167 |
| gcatctttgg  | ctcatctgct  | aaatagtaag | ggaatggagg  | aatgtgccta  | 34793217 |
| tggtcttcaa  | aggattctcc  | acaattaaga | taataatgga  | tagaaatag   | 34793267 |
| agtagattta  | gaagtgttaa  | caatagctgc | tgtcacagac  | gagccccaga  | 34793317 |
| tctaggtggc  | tcagcccaaa  | cttatttctt | aacttgttct  | tgaatggatg  | 34793367 |

|              |             |             |            |             |          |
|--------------|-------------|-------------|------------|-------------|----------|
| agagcttccc   | acattctctc  | taaggagccc  | gtactttctc | tgtttttag   | 34793417 |
| ctccatctcc   | tggagcctct  | acacctagct  | agaatattgg | gcagaaaaca  | 34793467 |
| gagcggagag   | cctttctgga  | agtttccata  | agtcagctct | ggaggttgca  | 34793517 |
| tacagcaaga   | atgctcttgg  | tctattgtcc  | aaaatccagg | ctttagacca  | 34793567 |
| gagttaaggt   | ttaagggagg  | ctggtagatg  | tgacacagat | gcatgcccg   | 34793617 |
| gtgatagagg   | tgatacattc  | tggtgccaca  | gggagagaag | atgagttaga  | 34793667 |
| agaagtattt   | gaggcatgga  | gttgggaaaa  | caaccctcaa | atggtttctg  | 34793717 |
| agtggctatc   | cagtctaaat  | ggattctctg  | ttgacttctt | tctcgagaca  | 34793767 |
| gATTTCCAGG   | GGGAGACTCGT | CCTAGCATCT  | GGGGTGAGTG | CCCACCAAAG  | 34793817 |
| TTTGCCACCA   | AGCTGGGCAG  | AGCTGTGGTC  | AAAGAAGGGC | AGATGGGGCG  | 34793867 |
| ATTCTCCTGC   | AAGATCACTG  | GCCGGCCTCC  | ACCACAGGTC | ACCTGGCTCA  | 34793917 |
| AGgtaaggct   | ttgtccaccc  | agactctggc  | ccttcccagg | aagcccgaga  | 34793967 |
| gctcacaccc   | tgggaatctg  | tctttccagt  | tagttccttc | tgtttcaacc  | 34794017 |
| ccggtcgttt   | ccccaaaggt  | ctgagtatat  | gtgatagtga | cattctactc  | 34794067 |
| tagggctccc   | tgctgtcact  | cagaccatgg  | tgttctcttc | ctcacctcac  | 34794117 |
| aaaacaacag   | aaagcttttg  | ttcaaagaca  | gacgaagcac | ctcaaggaag  | 34794167 |
| gagtttgaat   | tggggcacta  | attttcaggg  | agccgttcta | tggttcttga  | 34794217 |
| ggcatgtgac   | actagacaag  | tcacttaaac  | ccttggaacc | cagtctcacc  | 34794267 |
| agctttgagg   | taggagtaat  | gcctcagcat  | gttaggagga | cgctccgtgt  | 34794317 |
| ggaagtgttt   | tacagaccac  | tcataaccag  | accaagtgga | gagaggcaga  | 34794367 |
| agagatggtg   | gtaccaggta  | gtaagaaagg  | tggagatgga | acagggcact  | 34794417 |
| gagggatgtc   | aggaaggggtg | ggatcaaggc  | cagagagaga | ataggttttt  | 34794467 |
| cagagaagaa   | acttttgagt  | aagatgagta  | gtaggactcc | ttttacctct  | 34794517 |
| ttttgattct   | tctaaactca  | ccctcagggg  | aaaaaaaaag | gaaggcagga  | 34794567 |
| aaaaaaaaatga | agggagagat  | ccaggggtgc  | ctcacactcc | attccttcaa  | 34794617 |
| agaaacacag   | gccctctgag  | gcagtttcca  | cacgtcagca | gcaagcctct  | 34794667 |
| gcaggagcct   | caaggctgaa  | tgctcagggg  | tgactgtttc | ggtcttcttt  | 34794717 |
| ctgttagtgt   | gtgaaacacc  | acgaccaaaa  | gcaacttggg | gaggaaaggg  | 34794767 |
| tttgttttac   | ttacaccccc  | acattatagg  | gcatccctga | ggaagtccaga | 34794817 |
| gggggaacct   | ggagacagga  | gctaaaggac  | aagccatggg | tgaatgttgc  | 34794867 |
| ttacaggcct   | actctatagc  | gtgcatagtt  | tgctttttcc | cacacaccag  | 34794917 |
| aaccacccgc   | ccagggacag  | catgaccacc  | tgtgggctgg | gcccttccac  | 34794967 |
| atcaatcacc   | aatcaagaaa  | atgttcccca  | gtcttatcag | taggcccgcc  | 34795017 |
| tgatgagact   | tgaggtggtt  | ccgtcttctc  | agagggctct | accttgtgtc  | 34795067 |
| acgttaacaa   | cagacaagca  | aacagagtcg  | tcgccaggat | gaatctctgg  | 34795117 |
| agaccacaga   | acagatgctg  | tgtactcaag  | ccctggtgtc | cattctgcag  | 34795167 |
| gactagagga   | aaggcgggccc | aactgggtca  | aagagagcag | acgtctgtaa  | 34795217 |
| ccaagctctc   | ctgttgccac  | ttgtagCGAA  | ATGTCCCGTT | GCAGCCAAGT  | 34795267 |
| GCCCGtGTGT   | CAATGTCAGA  | GAAGAATGGC  | ATGCAGATCC | TGGAGATCCG  | 34795317 |
| TGGGGTCACT   | CGGGATGACC  | TGGGCGTGTA  | CACCTGCATG | GTGGTGAATG  | 34795367 |
| GGTCAGGGAA   | AGCCTCCATG  | TCGGCGGAGC  | TCTCCATCCC | AGGTaTTGGg  | 34795417 |
| ggccgatgca   | gagggaccct  | tccttgggtg  | cagaaccagc | atagacggag  | 34795467 |
| ctgttcctaa   | caccgcttgt  | gtgtatgcat  | gtgaaggaca | aagttttcaa  | 34795517 |
| ctagaagaga   | aaggcctaga  | ggaagatgct  | atgagctgcc | tgctcgcttc  | 34795567 |
| atgtgtgtcc   | ctaactagac  | cctgcccctt  | caatgtcctc | agtccttctc  | 34795617 |
| cctagctcag   | gtaggagggg  | ccctagggcag | gtggccctgg | tgtgtatgaa  | 34795667 |
| aaagcaaact   | acgcaagcta  | taaagtgtta  | gcctataagc | cacattcttc  | 34795717 |
| catggcttgt   | tttcatatct  | ctgactgtgg  | gaagagtggg | tggatgtgat  | 34795767 |

|             |             |            |            |             |          |
|-------------|-------------|------------|------------|-------------|----------|
| gatgctctgt  | cacctctcct  | gcctgacatg | taacttgtcc | attctgtcca  | 34795817 |
| tcaaatcaga  | tgtgtataaa  | gtgaggacat | gcctgctcta | aggcagagtt  | 34795867 |
| gaagagaagg  | tttttattgt  | agatgtgagc | gagcatacac | ccagaggcat  | 34795917 |
| ctggaagggt  | ccagaacaga  | aaaagaaatg | agtagactaa | acgtggttag  | 34795967 |
| cacgctgaag  | ctggccgtga  | gatggggaga | gacagagagg | aagagaagca  | 34796017 |
| accaaagatg  | accaagaggg  | aagtatagct | gaaatggtgg | ggttgtatag  | 34796067 |
| gagtgaaaag  | ctggggaaaag | attagcccat | gagctggaga | agtttagggt  | 34796117 |
| gggggtggca  | tgcagagaac  | tgggaagagc | tacagatatt | gagtgaggct  | 34796167 |
| ggaggccagc  | atgtgctttg  | gtatgctaag | aggaacctca | gtagccctt   | 34796217 |
| gtcccagggt  | tcttttagac  | cctacaaaat | tctcactcag | cctaactctt  | 34796267 |
| tctaccagg   | atcctcctca  | ccagagtgga | catgtcagca | cgctgctctt  | 34796317 |
| ccttgcttct  | gtcctcagcc  | ctgtctgttc | ttcctctgca | ctctctctca  | 34796367 |
| tcacctgctt  | acagtctcta  | gccttcccca | agtccagcct | gccccgtgct  | 34796417 |
| cacggactag  | tcacagatat  | gccttgggct | tgaggatcag | aaaggggaagc | 34796467 |
| cacctcatcg  | ccttcctcct  | cctgtatccc | ccacttctgc | ctgtgattcc  | 34796517 |
| cccttttgta  | tcttattcca  | ttccttagaa | actatggatt | tttgagcgct  | 34796567 |
| ctctctctct  | ttctctttct  | ctctctctcc | tctcccttca | tccatgtatc  | 34796617 |
| actttatcat  | caatcatcta  | tctatctatc | tatctatcta | tctatctatc  | 34796667 |
| tatctatcta  | tctatcatca  | aacatctatc | tctttataat | ctatctctct  | 34796717 |
| atcatctatc  | catccatcca  | tccatctacc | atctctttat | tttggtttaa  | 34796767 |
| gtgttttccg  | cagtccccag  | gaagaaactt | gtatgtgtaa | gtgtatttat  | 34796817 |
| ttacctgaga  | caagtgtcat  | ggagccaccc | tgagacatcc | catgtgccgc  | 34796867 |
| ccactgggat  | tttctgtccc  | agcagatgca | attaaacaa  | gaaactccag  | 34796917 |
| tcctgatcaa  | agaatgtgac  | ttggccactc | cccatgggtt | gggaactgtc  | 34796967 |
| aggcctctgc  | agcaagggtt  | agccaccctt | tcttattttc | cacagccttg  | 34797017 |
| catttaaaag  | cctctccctc  | ttaatgccta | taatgacaaa | atgatacacg  | 34797067 |
| gctgggattt  | gtttgaaagt  | actcaaaaac | aaacacacag | aataagagaa  | 34797117 |
| aagagatggg  | caggactggg  | aaaattgttc | tatcctcacc | gtgctggaag  | 34797167 |
| ctttcaagga  | cttgtaatat  | ctgcctttct | actagtagat | attttgggat  | 34797217 |
| ttccacgat   | actatttaaa  | aaagcagtag | acatggtaag | aaaacaatat  | 34797267 |
| attgtatttt  | tctgggtgtg  | taaaatgtta | cttcctttgt | atgtttctaa  | 34797317 |
| agcacttatc  | tgtccaaaat  | gcactttttt | ttttgggggg | gggcagttca  | 34797367 |
| gaaggctgaa  | ggtagccaag  | tgttgttggc | cttttacta  | gagggtttgt  | 34797417 |
| cccttgatat  | gtggctcggg  | tgataatgca | tctcctgtt  | tggtgaagca  | 34797467 |
| gaatggagtc  | cgtgccctca  | ggccccggct | gctgttataa | agcccagtca  | 34797517 |
| gagaagtgtc  | tctagtgtga  | gaaagctctc | tcgccctacc | cagagccctg  | 34797567 |
| agcaggggaag | ctctgtacta  | aagaaaaaaa | atgtcacctt | ctcattgtct  | 34797617 |
| ctgcttggca  | tataaaataa  | ccagctgtct | ttctgccctt | cttccagggt  | 34797667 |
| tggacaatgc  | cgctaggtat  | gtctttcttc | ataattgttg | ctttccagct  | 34797717 |
| tatactccgc  | acagaacagc  | agcagctaaa | tgccctgact | tctgaagtcc  | 34797767 |
| ttgtgtagga  | aatgagggtt  | ggctcagagg | accgctttcc | ttgggggtgct | 34797817 |
| ttgctctggt  | ttcctggggg  | agtttgctgc | ctggtttgat | tggaggttcc  | 34797867 |
| atccgtaaga  | agtttcttgg  | gacgctcagt | gctgtgtctt | cctcagtgtg  | 34797917 |
| gtctcagtgt  | cttcaaagca  | gaccacacta | aaggcgctgt | aaccctacc   | 34797967 |
| caggccagaa  | gccactctgc  | tctggcctac | agacccttg  | cttccttctt  | 34798017 |
| tcctttcagg  | atatgaagca  | tagagatgca | ggaccaggg  | tagagctgac  | 34798067 |
| tgtcggttgt  | agagaagggc  | tgtcaactgc | ctcgcatatg | gaattacagc  | 34798117 |
| tgtagtcctt  | gtggggaatc  | atgaccaaga | cacgaatgtc | agttactggg  | 34798167 |



|             |            |             |                |             |          |
|-------------|------------|-------------|----------------|-------------|----------|
| ttgacaatgc  | cctttctgaa | aatcccacat  | ttgaacacag     | accaggggaag | 34798217 |
| tgtaacatta  | gcaggtgaag | aaaagccttg  | gagaccatat     | tccaaccaga  | 34798267 |
| aggaacgggtg | ctgaaaagcc | ccaagaggag  | gtctgtgggg     | cccagataac  | 34798317 |
| ctccatgcag  | ctctagtagc | ctggctggct  | gcaggtcagt     | ggcttgtatg  | 34798367 |
| gcagaaggca  | gctagggctc | tgtctgccat  | tgcgatgcc      | acctttatta  | 34798417 |
| atagagtgga  | aagctaaaaa | actccttgac  | cttcaagtgg     | tataactcaa  | 34798467 |
| tttatgttgt  | ctgcagtgac | tatttagaat  | tggactaggg     | aggggccatg  | 34798517 |
| tgagctaagg  | aagtctgtgg | ttggtttgaa  | ctccagagcc     | ccagggagaa  | 34798567 |
| gagatatatc  | aatgcacagg | actactggtg  | gaagcaaggg     | actgggagag  | 34798617 |
| ccaagtatcc  | cctgagctct | ggcctgggga  | tacagagcaa     | gctacagtac  | 34798667 |
| ttcactatca  | actttcccct | gtgggctttg  | tggtagctga     | aatctgtacc  | 34798717 |
| gtgggaagta  | atgtttgcaa | agtaaccagg  | tggccactct     | gtccctggtg  | 34798767 |
| ccttctcccc  | tcttgaccat | cattgtcata  | cAGGTTGGCT     | GTGAGAGGAA  | 34798817 |
| CCAAAGCCCC  | CAGTCCAGAC | ATCAGGAAGG  | AGGTGACCAA     | TGGAGTCTCC  | 34798867 |
| AAAGACCCAG  | AGACTGTGGC | TGAAAGTAAG  | AACTGTCCAA     | GTCCCCAGAG  | 34798917 |
| GAGTGGCTCC  | TCAGCCCGGG | CCACCAACAG  | TCACCTCAAG     | TCCCCGCAGG  | 34798967 |
| AGCCCAAGCC  | AAAGCTGTGT | GAGGATGCTC  | CCAGAAAGGT     | CCCGCAGTCC  | 34799017 |
| TCCATCCTGC  | AGAAGTCCAC | CAGCACCATC  | ACTCTGCAGG     | CCTTGAAAGT  | 34799067 |
| CCAGCCAGAA  | GCGAGAGTAC | CAGCCATAGG  | GTCCTTCTCT     | CCTGGGGAAG  | 34799117 |
| ACAGGAAGAG  | TCTGGCTGCC | CCTCAGCAAG  | CCACACTCCC     | TACCAGACAG  | 34799167 |
| TCTAGCCTGG  | GAGGTTCCGT | TGGGAACAAG  | TTTGTTACCG     | GGAACATCCC  | 34799217 |
| CAGAGAGAGC  | CAAAGGGAGT | CAACATTCCC  | CAGATTTGAG     | AGTCAGCCCC  | 34799267 |
| AAAGCCAGGA  | aGTCACTGAA | GGTCAGACAG  | TCAAGTTCAT     | CTGCGAGGgt  | 34799317 |
| gagtaaaact  | gattaaagcg | ccgcttccca  | aaattcagct     | cctcgggtggc | 34799367 |
| cattccttcc  | cttcagcaca | caccagctctg | cacctcccgt     | atgtatgcac  | 34799417 |
| cccttaaact  | aggccctcca | ggaagcttcc  | ttccagggtc     | ttccctttag  | 34799467 |
| gaagtgttca  | gtctctaagt | ccttcgcttt  | ctagagagac     | atccaagagt  | 34799517 |
| atgaaacaca  | gcattgggtc | tatgccctaa  | ctcaccctg      | gtgtctccat  | 34799567 |
| catgacaaac  | acactgcagg | tgccttctc   | tctgtcctcc     | ctttcctggt  | 34799617 |
| cctgtctcac  | ctggagaact | ggcccatcac  | cctgctctgt     | cccacgtcag  | 34799667 |
| gaccctgcct  | ctcacaggac | ttcgactcca  | tgagtgcagg     | aggcgggctc  | 34799717 |
| ggatgtaggg  | aatcagttcc | accagcctg   | aattcttcca     | tcgtgatcag  | 34799767 |
| tctctcccca  | cctcacctta | taagcacaca  | gtgctccctg     | agggcacgtg  | 34799817 |
| ttccacacat  | ggccctgtag | TTTCAGGTAT  | ACCAAAGCCT     | GACGTGGGCT  | 34799867 |
| GGTTCCTGGA  | AGGCATCCCC | GTGAGGAGAC  | GGGAAGGCAT     | CACTGAGGTT  | 34799917 |
| TATGAAGATG  | GTGTATCCCA | TCACCTGTGC  | CTGCTGAGAG     | CCCGGACGAG  | 34799967 |
| AGACAGTGGG  | AGGTACAGCT | GCACAGC     | atC CAATAGCCTT | GgcCAGGTGT  | 34800017 |
| CCTGCAGCTG  | GAGCCTGCTG | GTGGAC      | gtg agtacatctc | cgtagatgag  | 34800067 |
| ctggctttca  | tgggtttcct | atgccttagg  | tagttcaggt     | cctacagctc  | 34800117 |
| cacacactag  | acatcctcgc | ccacgggcca  | agggaaaagt     | cactattccc  | 34800167 |
| aacccttgat  | tcttaatcag | acgtttactg  | cagaatcgca     | tcaaaacaga  | 34800217 |
| cattcccccg  | tccactccaa | agccagttga  | cagctacatt     | ttcttaggtt  | 34800267 |
| cctcagctgt  | gcatgtaatg | ctgtgactca  | gccgtaacca     | cagagaaatga | 34800317 |
| gcgttcccta  | aatatacagg | cttcaagaaa  | tatgagaagg     | tggggtgcca  | 34800367 |
| cgcttgat    | gcttattcag | tatctgttta  | tagaagcaat     | gcgtgttcat  | 34800417 |
| tgctcgggat  | tcaaaccata | tataatcttc  | tggctccaaa     | ataaatattt  | 34800467 |
| taatgtcttt  | taaacagatt | gcattggaat  | gctactgtct     | atcccaattt  | 34800517 |
| actcatgtaa  | cataaacatc | tttctatatg  | atttaatact     | ttttgaaggc  | 34800567 |

|            |             |             |             |            |          |
|------------|-------------|-------------|-------------|------------|----------|
| aaacttttta | gaagccatat  | aacactgtga  | gattggatgg  | atttcggcat | 34800617 |
| cttctcattt | tgttgactgt  | ttctgatggt  | attattttcc  | ccaccattat | 34800667 |
| agagaagcta | tgataaattg  | gactgaccat  | gcagctcagg  | gctagaatcg | 34800717 |
| cttgtccagc | ttgcaggagt  | tcctgagttt  | gatctctggc  | accagaacaa | 34800767 |
| aggaagagag | aggaagttag  | tcagtcagtc  | tatgtttccg  | tttgtttttc | 34800817 |
| tataaccttg | ttcccctggg  | ctgatgagag  | gcctcagtaa  | gccggggaac | 34800867 |
| cctgttgtca | agcctgatgc  | cctaagttca  | atccctggga  | tacacacaca | 34800917 |
| ctgttggaga | agagaagcaa  | cctccacaag  | gtgtcctctg  | acctccgcac | 34800967 |
| cgttgctatg | acaggcacac  | actcgcgcac  | acacactaaa  | taaatgtaat | 34801017 |
| ttcgaatatt | cctctttcaa  | tacataatgc  | cctatcatgg  | gccctagggg | 34801067 |
| catgtcaaac | cattggtaag  | cctattaaac  | gagaccacaa  | gagtcgcatc | 34801117 |
| accaagcaga | atgcacaaaag | ttgggaactc  | tacgggacca  | aaacatttgc | 34801167 |
| caagctatta | ttattattat  | tattattatt  | attattatat  | tttctttatt | 34801217 |
| tacatttcaa | atggtatccc  | ctttcctagt  | ttcctctcca  | aaaatcccct | 34801267 |
| atcctctctc | ccctcccct   | gctccctaac  | ccaccactc   | ccattcctgg | 34801317 |
| ttcttgcat  | cccctatact  | ggaacctaga  | gcctttacag  | gaccaacggc | 34801367 |
| ctctcctccc | attgatgacc  | gactaggcca  | tcctctgcta  | caagctagag | 34801417 |
| ccacaagttc | caccatgtgt  | tttctttgat  | tggtggtata  | gttccaaaga | 34801467 |
| actctgaggg | tactggctag  | ttcatattga  | tgttccttct  | atggggcttc | 34801517 |
| agtccccttc | agctccctgg  | gtatttctct  | ggctccttca  | ttggggacct | 34801567 |
| tgtgctccgt | ccaatggatg  | actgtgaaca  | tccacttctg  | tatttgccag | 34801617 |
| gcactggcat | atcctcgcag  | gagacagcta  | tatcaggctc  | ctgtcagcat | 34801667 |
| tgccaaccta | ttctaattgca | tgagttacag  | ggaagtagaa  | aggagagagg | 34801717 |
| cataaggtac | aaaatattta  | gattaaaaat  | tataaataac  | gtaagtgttg | 34801767 |
| atctcttgtg | gactttgaat  | gactccaact  | gaaacatttt  | tttaaagatg | 34801817 |
| tatatattta | taatgtatac  | aacattctgt  | ctgcatgtat  | gattgcatgc | 34801867 |
| cagaagaagg | caccagatcc  | cattacagat  | ggttggttagc | caccatgtgg | 34801917 |
| ttgctggaat | ttgaactcag  | gacctctgga  | agagcagtca  | atgctcttaa | 34801967 |
| ctgctgagcc | atccctccag  | cccctgaaac  | catttttaat  | cttttttgtg | 34802017 |
| agacattaga | aaaatgtaaa  | ctttgacaaa  | tatgagacac  | atggtgctgt | 34802067 |
| ttaaggtcgt | gatggtggtc  | tcatggtttc  | tttttaactt  | attctccatt | 34802117 |
| gaaacttatg | tgatttcttg  | tgtttgccct  | aaaacactt   | cacatttggg | 34802167 |
| cagcatggat | aagaatagca  | ataaaataat  | attagtatat  | atgaatagaa | 34802217 |
| gtgagtggta | gctacacagg  | gattgaaatc  | ttcagataga  | ctcttttgac | 34802267 |
| ttcagtgctc | atctgaaaat  | caccacagga  | aataacgcag  | tagaagaggg | 34802317 |
| tgtgaggagc | ctctggaact  | ggacttacat  | gcggttggtga | gccatctgtc | 34802367 |
| ataggtgctg | gggactcagc  | ctgggacctc  | tggaagagca  | gcaagtgttc | 34802417 |
| ctaacttctg | agctgtctct  | ccagctccct  | cgcttgcccc  | tttactggga | 34802467 |
| ctttactgca | ttggcgaatc  | tcttcacaag  | gaatgttatc  | cattcctttt | 34802517 |
| ggaaatggag | cacctatggg  | cagggctggc  | agaccagca   | gctcctgctt | 34802567 |
| catcagctgc | tccaggctcc  | gtgtcttgctc | aggggcagat  | gtgtgtcttc | 34802617 |
| aggtctacca | aaggcgaatg  | agatgtctgc  | aggactgaga  | ttctcccacg | 34802667 |
| gctttgtctg | ctgtgagttt  | gtctaaatct  | tagagaaaac  | agtttctttc | 34802717 |
| tgtctttctt | attcacatct  | tggggctcatt | tgtctctcac  | aaattcctct | 34802767 |
| cattttgcta | ttctttttgt  | tggtttgtgt  | ggtaggcaat  | tttgagacag | 34802817 |
| aattgatata | gcataaaagt  | catcctttaa  | aggttgtaat  | tactgactt  | 34802867 |
| taacacagtc | accatctaata | ttgaggccat  | cactccaatc  | ctagccttca | 34802917 |
| tcagacatcg | ctgttcccat  | agccccagct  | ccgacagcgg  | ttatttattt | 34802967 |

|             |             |             |              |             |          |
|-------------|-------------|-------------|--------------|-------------|----------|
| tctgtctcta  | tggatttgcc  | tattcggaac  | atthttgtatc  | agtggacttc  | 34803017 |
| catagcgtgt  | ggtcttttgt  | gaatggcttc  | tttctctgag   | aagaacgatt  | 34803067 |
| ctgagcttca  | tccttgtgta  | cctgccttca  | ttcaccttta   | tacctgaaca  | 34803117 |
| acatcccact  | gtctgggtcg  | gcctgctggg  | tttgcccagt   | cattagtaga  | 34803167 |
| taaatthttg  | gtgggtttct  | gctttctgag  | cattthtttac  | tttaatthtt  | 34803217 |
| aaaaatthca  | tacatgaata  | cacagcattt  | gcacatttat   | accctctct   | 34803267 |
| ctcctgcccc  | agthttatccc | atatatcccc  | atcactgctt   | ctctacttca  | 34803317 |
| tgacatctga  | ttctataaatt | attattgctc  | tacacacata   | cacactcaca  | 34803367 |
| caaactcata  | catactaaca  | tactcacaca  | tacatgcaca   | tgcacacaca  | 34803417 |
| tacacacatt  | cacacataca  | taccttaaca  | catgcacaca   | cacagacatt  | 34803467 |
| cacatataca  | ttcatactta  | tgcacataca  | tttacacatg   | catacacaca  | 34803517 |
| gacattcaca  | cacattcaca  | ctcacacaca  | tagacattca   | cacttacaca  | 34803567 |
| catacattaa  | tccatacaca  | cacagagaca  | ttcacactca   | cacagacatt  | 34803617 |
| cacactcaca  | aacattcaca  | cccactcactc | acacacatac   | acatactctc  | 34803667 |
| acagacactc  | tcacctatac  | tcacagacac  | atatatacac   | tcagacattc  | 34803717 |
| acacagacac  | attctctctc  | tctctctctc  | tctctctctc   | tctctctctc  | 34803767 |
| tctctcacac  | acacacacac  | acacacacac  | acacacacac   | acacacacac  | 34803817 |
| acacacagaa  | ttagtccagt  | taatattacc  | tgcaagtgca   | ttcatttagg  | 34803867 |
| gctggccact  | taggattgga  | aaatctatca  | gggtctctc    | atccctgaag  | 34803917 |
| aaagctgatt  | gtccctccct  | tagcaacatt  | ggctgctttt   | tctaggggag  | 34803967 |
| gggctcactg  | tgagcattgt  | gggccagtgc  | tttgttgagc   | catgtgctag  | 34804017 |
| tgccgtgttt  | ccctttgagg  | aactgcagac  | tgttttccac   | agtggtagca  | 34804067 |
| ccatcagtgt  | ccaaggctcc  | gattgctccc  | gcatactcac   | cagcagattc  | 34804117 |
| catccacatt  | ttactcgtct  | gttcttattt  | ctctgggact   | tggacttgca  | 34804167 |
| tttccccgat  | gactaactaa  | cactgagtat  | aatttcatgc   | actthtttga  | 34804217 |
| cattggcata  | ttttctttgc  | agagctatct  | agtgaaaatt   | tgttgtagca  | 34804267 |
| tttttaaaaa  | tcgagtcatt  | ttttgttggtg | gactthttaag  | agttctttat  | 34804317 |
| atatttgga   | tataaatctt  | ttatcgaatg  | aataacttta   | attattthtt  | 34804367 |
| cctataaagt  | ctggatgtgt  | tatccttctg  | tccatgtgac   | caaataattg  | 34804417 |
| actgaaagga  | ggaaagatat  | atthttggctc | acagtthtgag  | gthttcagtc  | 34804467 |
| atggccagct  | acctccacta  | cctthtggtcc | tgtggaaagg   | caggtctgcc  | 34804517 |
| agggagggtg  | tgatggagga  | gactccccag  | ctctcacaa    | tggggagtaa  | 34804567 |
| aggaagagac  | gaagggtgt   | agtcccaata  | tgccctgaaa   | gcacacccca  | 34804617 |
| gcagtgcact  | aactthcttc  | cactagctcc  | cccataaagg   | gtctaccatc  | 34804667 |
| tcctagaagg  | ttggggaccc  | agtgcattgga | ctcttgggaa   | gcattcagtag | 34804717 |
| ctccggatta  | cttatcatag  | gtccagtgaa  | gcctccatat   | cttgatgcct  | 34804767 |
| gggttaagat  | ctggctgtga  | ataaccagtg  | tgtcttccaa   | ccttgggtga  | 34804817 |
| gggttctgc   | atatgtthtga | gctaactctc  | aggactactg   | ctgacagtht  | 34804867 |
| acaactcagc  | ttagccttta  | thtctctgcta | gtacagagcc   | tccaggccag  | 34804917 |
| ccataggtga  | aaggagggtcc | ctcccaggtc  | thtcttaagc   | atacatatag  | 34804967 |
| ctctctacct  | gcattggggcc | ctctagggct  | ctgacaatgt   | gctggagtht  | 34805017 |
| catagccatg  | gacattthccc | cagattthtcc | thtthtaagtht | tattgcttag  | 34805067 |
| gctcttacta  | gtccggctga  | tattgctgcc  | tcggaggcag   | agattgttaa  | 34805117 |
| caattgcttht | thtcaaaata  | ccttggaaac  | agattggtht   | acattggacca | 34805167 |
| agctgagtca  | ggtcaagaag  | gacagccctg  | aaggcagagc   | aaagggtctg  | 34805217 |
| ctagaccag   | gccattggtga | tgattctctt  | gggtctgtgg   | tcctgtgctc  | 34805267 |
| tggctctctc  | caacccttgc  | cgaacagctc  | atthttctcaa  | gttccatagt  | 34805317 |
| tgcttctggt  | thtcaaagct  | gccgagagct  | atggtgaagg   | caagggtgct  | 34805367 |

|            |             |             |            |            |          |
|------------|-------------|-------------|------------|------------|----------|
| tggggtatta | ttgctgtgaa  | gagacaccat  | gaccgcaaca | actcttataa | 34805417 |
| aggaaaacat | ttaatttggc  | tggcttacag  | ttcagaggtt | ttagtctcta | 34805467 |
| catctagatt | ggcaggcagc  | aggaagtgaa  | gacggagaca | gacttcctcc | 34805517 |
| aacaaaaacc | acacctactc  | cagcaaggcc  | ttgtacctcc | taacagcgcc | 34805567 |
| actccctgtg | agcttataag  | gaattttttc  | tttttcaaac | caccacagga | 34805617 |
| gagaccacaa | agttagctgt  | ccttgccaac  | atccagctga | gcttgggagg | 34805667 |
| tggggtttgt | ttttctcaag  | ccatggttca  | tatctagtgg | tttggagagc | 34805717 |
| ctgatctcag | tctttgggat  | gacattctct  | ctgcttttat | ggagtagatt | 34805767 |
| gcagaggttt | ggttttggtt  | ttggtttttc  | tctgctcttc | tggaagtaca | 34805817 |
| ctgtaccccc | ctattctctt  | aaggtgtcgg  | ctaccttgca | gccactccat | 34805867 |
| accacaaatc | tcccattcgt  | actttagggg  | gacacagtct | gtgccgtgca | 34805917 |
| tgttatntag | catccccttc  | ctctgactgc  | ataaaggctg | tcttcctcca | 34805967 |
| ctcactggtc | tcttccatcg  | cttccgtcct  | ccgtggacat | cttatatggc | 34806017 |
| agcgatgact | ctacctctag  | ttttccctcc  | tcaagcacgc | agagaagctc | 34806067 |
| cttctttctt | ggttgctctt  | gagctcctcc  | ttggcctctc | tactccatca | 34806117 |
| caccaaactc | tacttgttcc  | aagcacagct  | tccgtcgtgc | acggcttccg | 34806167 |
| agtgagcaca | gcttctgcgc  | acagcttttg  | tacacagctt | ctgtgcgcag | 34806217 |
| cttctgttac | agcctccgca  | cacagattct  | tccaagcact | tctttttcct | 34806267 |
| gttcaacgag | agtagtaaac  | atccataggg  | gatgtcctac | agcagcactt | 34806317 |
| ctcaacctgt | gggtcgtgac  | tcctttggca  | agcctctatc | tccaaaaata | 34806367 |
| ttacattac  | aattcctaac  | agtggcagaa  | ttgaagtctt | gaaagagcaa | 34806417 |
| cgaaaaagta | acctttatag  | tggggagctc  | ccacaacgtg | aggagctgta | 34806467 |
| ttaaagggtc | ggagcattag  | aaaggtcaag  | aacctctggt | ctatggaata | 34806517 |
| ggcttgtgcc | aatgctgtc   | cttgcattgc  | ttgctttagt | ttatataaat | 34806567 |
| ggccctatt  | gccttgatgg  | ataattatag  | gtacagctgt | tttccagagg | 34806617 |
| agagtacagt | gcagttatgt  | tacctgtcca  | gtgccttaga | aaagatgcca | 34806667 |
| tgtttctaac | ccaagtcagc  | taggaatata  | attttgttgg | tgactgggta | 34806717 |
| gcatctccct | agtcagggga  | tctgatgggtg | actcagagaa | ggtgtagatg | 34806767 |
| gtgccttcct | acagctcttg  | aaccagttgt  | tccttcctca | gtgccaggcc | 34806817 |
| ggatcagaca | gacacaccat  | tgctctgtct  | tgtgtctgct | cacccaccac | 34806867 |
| ttaccctcct | gaggtctgga  | gagagtgtgg  | ttacagaatc | agagagttgg | 34806917 |
| tgtgaacttt | gcctcactgt  | ggatctatct  | gactgtgaga | aatgatgaac | 34806967 |
| tttgtccctg | gactgtcaca  | gtccctctaa  | gttcatgagc | actgtcaata | 34807017 |
| accctgcag  | tgcagtgtag  | cttgcctcca  | cctctctcta | agagtaccac | 34807067 |
| ttatggcttc | taattacca   | gttgcctctg  | tgactttact | gatttagaag | 34807117 |
| ccaaagtctg | gcctgtttgc  | ttgcttgctt  | tctttctttc | tttctttctt | 34807167 |
| tctttctttc | tttctttctt  | tctttctttc  | tttctttggt | tcttgtatgt | 34807217 |
| gaatgcattg | tcaactctct  | tagtcacacc  | agaagagggc | atcagatccc | 34807267 |
| attatagatg | gctgtgagcc  | accatgtggg  | tactgggaat | tgaactcagg | 34807317 |
| acctctggaa | gagcagtcag  | ttcttttttt  | tttttttttt | ttaaactttt | 34807367 |
| aacttagttt | ttaactttatt | tttttttcca  | ttttttatta | ggtatttaac | 34807417 |
| tcatttacat | ttccaatgct  | ataccaaaag  | tccccatat  | ccaccaccac | 34807467 |
| ccactcccct | gcccaccacc  | tccccctttt  | tggccctggg | attcccctgt | 34807517 |
| actggggcat | ataaagtttg  | caagtccaat  | gggcctctct | ttccagtgat | 34807567 |
| ggccgactag | gccatctttt  | gatatatatg  | cagctagagt | caagagctcc | 34807617 |
| ggggtactgg | ttagctcata  | atgttgttcc  | acctataggg | ttgcagatcc | 34807667 |
| ctttagctcc | ttgggtactt  | tctctagctc  | ctccattggg | agccctatga | 34807717 |
| tccatccatt | agctgactgt  | gagcatccac  | ttctgtgttt | gctgggccct | 34807767 |

|            |             |             |             |             |          |
|------------|-------------|-------------|-------------|-------------|----------|
| ggcatagtct | cacaagagac  | agctacatct  | gcgtcctttc  | aataaaatct  | 34807817 |
| tgctagtgta | tgcaatggtg  | tcagcgtttg  | gatgctgatt  | atgggggtgga | 34807867 |
| tccctggcta | tggcagtctc  | tacatggtcc  | atcctttcat  | ctcagctcca  | 34807917 |
| aactccgtct | ctgtaactcc  | ttccatgggt  | gttttgttcc  | caaatactaag | 34807967 |
| gaggggcata | gtgtccacac  | ttcagtcttc  | attctccttg  | agtttcatgt  | 34808017 |
| gtttagcaaa | ttatatctta  | tatcttgggt  | atcctaggtt  | tggggctaata | 34808067 |
| atccacttat | tagtgaatac  | atattgtgtg  | agtttctttg  | tgaatgtgtt  | 34808117 |
| acctcactca | ggatgatgcc  | ctccaggtcc  | atccatttgg  | ctaggaattt  | 34808167 |
| cataaattca | ttctttttta  | tagctgagta  | gtactccatt  | gtgtagatgt  | 34808217 |
| accacatttt | ctgtatccat  | tcctctgttg  | aggggcatct  | aggttctttc  | 34808267 |
| cagcttctgg | ctattataaa  | taaggctgct  | atgaacatag  | tggagcatgt  | 34808317 |
| gtccttctta | cctgttgggg  | catcttctgg  | atatatgcc   | aggagaggta  | 34808367 |
| ttgctggatc | ctccggtagt  | actatgtcca  | atthttctgag | gaaccgccag  | 34808417 |
| actgatttcc | agagtgggtg  | tacaagcctg  | cactcccacc  | aacaatggag  | 34808467 |
| gagtgatcct | ctttctccac  | atcctcgcca  | gcatctgctg  | tcacctgaat  | 34808517 |
| ttttgatctt | agccattctg  | actggtgtga  | ggtggaatct  | cagggttgtt  | 34808567 |
| ttgatttgca | ttccctgat   | gattaaggat  | gttgaacatt  | ttttcaagtg  | 34808617 |
| cttctctgcc | attcggtatt  | cctcaggtga  | gaattctttg  | ttcagttctg  | 34808667 |
| agccccattt | tttaatgggg  | ttatttgatt  | ttctgaagtc  | caccttcttg  | 34808717 |
| agttctttat | atatgtttgga | tattagtccc  | ctatctgatt  | taggataggt  | 34808767 |
| aaagatcctt | tccaatctg   | ttggtggtct  | ttttgtctta  | ttgacggtgt  | 34808817 |
| cttttgccct | gcagaaactt  | tggagtttca  | ttaggtccca  | tttgtcgatt  | 34808867 |
| ctcgatctta | cagcacaagc  | cattgctggt  | ctgttcagga  | atthttcccc  | 34808917 |
| tgtgcccata | tcttcaaggc  | ttttccccac  | tttctcctct  | ataagtthca  | 34808967 |
| gtgtctctgg | ttttatgtga  | agttccttga  | tccacttaga  | tttgacctta  | 34809017 |
| gtacaaggag | ataagtatgg  | atcgattcgc  | attcttctac  | acgataacaa  | 34809067 |
| ccagttgtgc | cagcaccaat  | tgttgaaaat  | gctgtccttc  | ttccactgga  | 34809117 |
| tggttttagc | tccttgtcg   | aagatcaagt  | gaccataggt  | gtgtgggttc  | 34809167 |
| atthctggat | cttcaattct  | attccattgg  | tctacttgtc  | tgtctctata  | 34809217 |
| ccagtagcat | gcagttttta  | tcacaattgc  | tctgtagtaa  | agctthtaggt | 34809267 |
| ctggcatggg | gattccgcca  | gaagttcttt  | tatccttgag  | aagactthtt  | 34809317 |
| gctatcctag | gtthttttgtt | attccagaca  | aatthgcaaa  | ttgctccttc  | 34809367 |
| caattcgttg | aagaattgag  | ttggaatttt  | gatggggatt  | gcattgaatc  | 34809417 |
| tgtagattgc | ttttggcaag  | atagccattt  | ttacaatgtt  | gatcctgcca  | 34809467 |
| atccatgagc | atggggagatc | tttccatctt  | ctgagatctt  | ctthtaatttc | 34809517 |
| tttcttcaga | gatttgaagt  | ttttatcata  | cagatctttc  | acctccttag  | 34809567 |
| ttagagtcac | gccaaagatat | tttatattat  | ttgtgactat  | tgagaagggt  | 34809617 |
| gttgtttccc | taatttcttt  | ctcagcctgt  | ttattctttg  | tatagagaaa  | 34809667 |
| ggccattgac | ttgtttgagt  | ttattttata  | tccagctact  | tcaccgaagc  | 34809717 |
| tgtttatcag | gttttaggagt | tctctggtag  | aatthtttagg | gtcacttata  | 34809767 |
| tatactatca | tatcatctgc  | aaaaagtgat  | atthttgactt | cctctthttcc | 34809817 |
| aatthgtatc | cccttgatct  | cctthttgttg | tcgaattgct  | ctggctaata  | 34809867 |
| cttcaagtac | tatgttgaaa  | aggtagggag  | aaagtgggca  | gccttgtcta  | 34809917 |
| gtccctgatt | ttagtgggat  | tgttccagc   | ttctctccat  | ttactthtgat | 34809967 |
| gttggctact | ggtttgctgt  | agattgcttt  | tatcatgttt  | aggatatgggc | 34810017 |
| cttgaattcc | tgatctthtc  | aaaactthta  | tcatgaatgg  | gtgttgatc   | 34810067 |
| ttgtcaaata | ctthttctgc  | atctaacgag  | atgatcatgt  | ggtthttgtc  | 34810117 |
| tttgagtthg | tttatataat  | ggattacatt  | gatggatttt  | cgtatathaa  | 34810167 |

|             |             |             |             |             |          |
|-------------|-------------|-------------|-------------|-------------|----------|
| accatccctg  | catccctgga  | ataaaaccta  | cttggtcagg  | atggatgatt  | 34810217 |
| gctttaatgt  | gttcttggat  | tcggttagcg  | agaattttat  | tgaggatttt  | 34810267 |
| tgcatcgata  | ttcataagag  | aaattggtct  | gaagttctct  | atctttgttg  | 34810317 |
| gatctttctg  | tggttttaggt | atcagagtaa  | tagtggcttc  | ataaaatgag  | 34810367 |
| ttgggtagag  | taccttctac  | ttctattttg  | tgaaatagtt  | tgtgcagaat  | 34810417 |
| tggaattaga  | tcttctttga  | aggtctgata  | gaactctgca  | ctaaacccat  | 34810467 |
| ctggctctgg  | gctttttttg  | gttgggagac  | tattaataac  | tgcttctatt  | 34810517 |
| tcttttaggtg | atatgggact  | gtttagatgg  | tcaacttgat  | cctgattcaa  | 34810567 |
| ctttgggtacc | tggtatctgt  | ccagaaatth  | gtccatttcg  | tccaggtttt  | 34810617 |
| ccagttttgt  | tgagtatagc  | ctttttaga   | aggatctgat  | ggtgttttg   | 34810667 |
| atctctcag   | gatctgttgt  | tatgtctccc  | tttctatttc  | tgattttggt  | 34810717 |
| aattaggatt  | ttgtccctgt  | gccctttagt  | gagtctagct  | aagggtttat  | 34810767 |
| ctatcttggt  | gattttctca  | aagaaccaac  | tcctcgtttg  | gttgattctt  | 34810817 |
| tgaatagtte  | ttcttgtttc  | cacttggttg  | atctcacc    | tgagtttgat  | 34810867 |
| tatttcctgc  | cgtctactcc  | tcttgggtga  | atctgcttc   | tttttctca   | 34810917 |
| gggcttttag  | atgtgttgte  | aagctgctag  | tatctgctgt  | ctcccgtttc  | 34810967 |
| ttcttggagg  | cactcagcgc  | tatgagtttc  | cctcttagaa  | atgctttcat  | 34811017 |
| tgtgtcccat  | aggtttgggt  | acgttgtggc  | ttcattttca  | ttaaactcta  | 34811067 |
| aaaagtcttt  | aatttctttc  | tttattcctt  | ccttgaccaa  | ggtatcattg  | 34811117 |
| agaagagtgt  | tatcagtttc  | cacgtgaatg  | ttggctttcc  | attatttatg  | 34811167 |
| ttgttattga  | agatcagtct  | taggccatgg  | tggtctgata  | ggatacatgg  | 34811217 |
| gacaatttca  | atatttttgt  | atctattgag  | gcctgttttg  | tgaccaatta  | 34811267 |
| tatggtcaat  | tttgagagaag | gtcccgtgag  | gtgctgagaa  | gaaggtatat  | 34811317 |
| ccttttggtt  | taggataaaa  | tgttctgtag  | atatctgtca  | ggtccatttg  | 34811367 |
| tttcataact  | tctgttagtt  | tcaactgtgc  | cctgtttagt  | ttctgtttcc  | 34811417 |
| acgatctgtc  | ctttgaagaa  | agtgggtgtg  | tgaagtctcc  | cactattatt  | 34811467 |
| gtgtgagggtg | caatgtatgc  | tttgagcttt  | actaaagtgt  | ctctaataaa  | 34811517 |
| tgtggctgcc  | cttgcatttg  | gtgctgtagat | atcagaat    | gagagttcct  | 34811567 |
| cttggaggat  | tttacctttg  | atgagtatga  | agtgtccctc  | cttgtctttt  | 34811617 |
| ttgataactt  | tggtttggaa  | gtcgaattta  | tccgatatta  | aatggctac   | 34811667 |
| tccagcttgt  | ttcttcagtc  | catttgcttg  | gaaaattgtt  | ttccagcctt  | 34811717 |
| tcaactctgag | gtagtgtctg  | tctttttccc  | tgagatgggt  | ttcctgtaag  | 34811767 |
| cagcagaatg  | ttgggtcctg  | tttgtgtagc  | cagtctgtta  | gtctatgtct  | 34811817 |
| ttttattggg  | gaattgagtc  | cattgatatt  | aagagatatt  | aaggaaaagt  | 34811867 |
| aattgttgct  | cccttttatt  | tttgttgta   | gagttggcat  | tctgttcttg  | 34811917 |
| tggtctgtct  | ctttttggtt  | tgttgaatga  | ttactttctt  | ggttggttcta | 34811967 |
| gggcgtgatt  | tccgtccttg  | tattgcttct  | tttctgttat  | tatcctttga  | 34812017 |
| agggtcggat  | tcgtggaaag  | atattgtgtg  | aacttgggtt  | tgtcgtggaa  | 34812067 |
| tactttgggt  | tctccatcta  | tggttaattga | gagtttggcc  | gggtatagta  | 34812117 |
| gcctgggctg  | gcatttgtgt  | tctcttagtg  | tctgtataac  | atctgtccag  | 34812167 |
| gctcttctgg  | ctttcatagt  | ctctggtgaa  | aagtctgggtg | taattctgat  | 34812217 |
| aggccttcct  | ttatatgtta  | cttgaccttt  | ctcccttact  | gcttttaata  | 34812267 |
| ttctatcttt  | atttagtgca  | tttgttggtc  | tgattattat  | gtgtcgggag  | 34812317 |
| gaatttcttt  | tctgggtccag | tctatttgga  | gttctgtatg  | cttctgtgat  | 34812367 |
| gatcatgggc  | atctcttttt  | ttatgttttg  | gaagttttct  | tctattattt  | 34812417 |
| tgttgaagat  | attagctggc  | cctttaagtt  | gaaaatcttc  | attctcatca  | 34812467 |
| attcctatta  | tccgtagggt  | tggtcttctc  | attgtgtcct  | ggattacctg  | 34812517 |
| gatgttttga  | gttaggatcc  | ttttgcattt  | tgtattttct  | ttgactgttg  | 34812567 |

|            |            |             |            |             |          |
|------------|------------|-------------|------------|-------------|----------|
| tgtcgatggt | ctctatggaa | tcttctgcac  | ctgagattct | ctcttccatt  | 34812617 |
| tcttgatct  | tggtgctgat | gctcgcacct  | atggttccag | atctctttcc  | 34812667 |
| tagggtttct | atctccagcg | ttgcctcgcct | ttgggttttc | tttattgtgt  | 34812717 |
| ctacttcccc | ttttagttct | agtatggttt  | tgttcatttc | catcacctgt  | 34812767 |
| ttggctgtgt | tttctgctt  | ttctttaaga  | gcctgtaact | ctttagcagt  | 34812817 |
| gctctcctgt | aaatctttaa | gtgacttatg  | aaagtccttc | ttgatgtcct  | 34812867 |
| ctatcatcat | catgagaaat | gtttttaaat  | ctgggtctag | atcttcgggt  | 34812917 |
| gtgttggggg | gcccaggact | agggtggggtg | ggagtgcctg | gttctgatga  | 34812967 |
| tggtgagtgg | tcttgatttc | tgtagtagg   | attcttacgt | ttgcctttcg  | 34813017 |
| ccatctggta | atctctgaag | ctagctgttt  | tagttgtcac | tgtaagagc   | 34813067 |
| ttgttcttca | ggtgactctg | ttagcctcta  | tgagcagacc | tggagggtag  | 34813117 |
| cactctcctt | agtttcagtg | ggcagagtat  | tctctgcagg | caagctctct  | 34813167 |
| tcttgcaagg | caggtacca  | gatatctggg  | gttcgaacca | gactcctggc  | 34813217 |
| agaagttgtg | ttccactcac | tagaggctct  | aggatcacgt | gtggaatcct  | 34813267 |
| gtgtggggcc | ttgcgggtgt | caggcgactc  | agctggcaag | gtagccgggg  | 34813317 |
| ctcgagtgga | gtggaagggg | tttgtgcccc  | agatcaagcc | cgggtagcct  | 34813367 |
| gcttccctat | gtaccgcagt | ctcaagttcc  | acgcgattgg | attggggtag  | 34813417 |
| gcgctgtgtt | ccactacca  | aaggctcttag | gggtcccgtg | ggagctcccgt | 34813467 |
| gtgggcccct | gcgggtgttg | ggcaagactc  | tgctgtcaag | gtagcccggg  | 34813517 |
| gctcgagtct | cgagtcgagc | ggaagggact  | tgtgccccag | atcaggcccg  | 34813567 |
| gtagcctgc  | ttccctatgt | accgcagctc  | cgagttccgt | gcgattggat  | 34813617 |
| tggggcaggc | actgtgatcc | actcaccaga  | ggctcttagg | tcccgtgggg  | 34813667 |
| agtcctgtgt | ggacccttgc | gggtgttggg  | caagactctg | ctggcaaggt  | 34813717 |
| agcccggggc | tcgagtctcg | agtcgagcgg  | aagccagtca | gttcttttaa  | 34813767 |
| ccactgagaa | ctcaggacct | ctggaagaac  | agtcagttct | tttaaccact  | 34813817 |
| gagccatcgc | tctagccccg | gtcctcaaag  | tttaaagtgt | ttttagattc  | 34813867 |
| acattgtgga | aggtttgaac | tttgaaaatc  | cagctggcag | gtctcttaga  | 34813917 |
| gtagagattc | atctgtgtgt | gtgcatgtgt  | gtgtgtgtgt | gtgtgtgtgt  | 34813967 |
| gtgtcctctg | tcactttgaa | ccttggactt  | agaacagggc | tcaagccaca  | 34814017 |
| cttggaaaac | acatatgact | cttggctgtt  | tgattcattc | ctggaattgt  | 34814067 |
| aaaaaaaaaa | aaaaaacaat | taaataact   | tcagatggaa | atattcccac  | 34814117 |
| catggacctg | tagtttctac | agatttgaac  | catgcaataa | gcccgtgtaa  | 34814167 |
| ttagtgatgg | tatgtaaaaa | gaggagagct  | ggaacacagt | cacaccaga   | 34814217 |
| aaggaggagg | aaggcattcc | caggatcatc  | aggatagcag | aggtcaaattg | 34814267 |
| tcaaaagtag | atgggagagg | cctgagtcac  | aaggagagaa | ggcaggcctg  | 34814317 |
| ggtgtgagcg | ccatagccct | aggaagcttt  | gtgaccctgg | aaggcccctt  | 34814367 |
| ttcagttgta | ctgcaggcat | caatgccttt  | cctccctaag | gatggaggta  | 34814417 |
| ggcaagacac | agccagctgt | tgaggaagcc  | cagggcacag | gacaatgggc  | 34814467 |
| tgtttgcctt | gcaaggcttg | agataactgg  | ttggtcacca | ggtgggtgag  | 34814517 |
| ctgggacctt | agagggccta | tctgttgttt  | cccttcacag | GGCCGAACTT  | 34814567 |
| GGCACAGACA | GCCCCTTCAT | TCTCTAGTGT  | TCTGAAGGAC | AGTGTGTGCA  | 34814617 |
| TTGAGGGCCA | GGATTTTGTG | CTACGGTGCT  | CAGTGCAGGG | GA CTCCAGCA | 34814667 |
| CCCCGGGTCA | CGTGGCTGCT | CAATGgtgag  | tttccccttg | ctccagtccc  | 34814717 |
| tgtgcaactg | agttcacttg | tcactccgaa  | ccatatgtgc | ctcagaaggg  | 34814767 |
| cagagaaggg | aagacgtggg | aactggctcg  | gctgtttgct | agctggcctg  | 34814817 |
| gctcatctgc | tctttgggaa | tactgctgcc  | agcctggcag | ggcagctagg  | 34814867 |
| agaactcact | tccttcacat | gtataaagtg  | ggagggtgag | atacctgccc  | 34814917 |
| aaagatacgt | atgcagctca | atctcatatc  | ttatgattag | actcctaaga  | 34814967 |

|             |            |             |            |            |          |
|-------------|------------|-------------|------------|------------|----------|
| gagcatcgat  | aggcgtttat | tgagttgata  | aatgaacatg | cagatggata | 34815017 |
| accagtgac   | ccacgtaga  | aagtagccaa  | ggaatttgac | cttttatcga | 34815067 |
| ggggcaggtg  | gatctagaat | aaaaactagt  | gattcattat | gatgttaatt | 34815117 |
| gtaattctat  | aattaagtaa | agctctctga  | cttttgtttt | gtttttgaga | 34815167 |
| cagggctctct | ctatgtagcc | ctggttgtcc  | tgaaatttac | tgtgtagaag | 34815217 |
| aggctagcca  | tgaactcaga | gatatctgcc  | tgcctctgct | tccaagtgct | 34815267 |
| gggattaaaa  | gtgtgtccca | tactgctctg  | gcataagtaa | taactctttg | 34815317 |
| aaaaaataat  | taacaaatat | tctcaccctt  | ctcctctttt | gagggctctc | 34815367 |
| taatttttaa  | tttttaattt | aaatttaagt  | gtgggagact | gactttaaaa | 34815417 |
| ctgggaacag  | tctgttcagt | gggcatagct  | gggcagaggc | tgttggtaag | 34815467 |
| aaaccttagg  | gacctgctaa | gaggggactc  | tccagcccag | agtcatcaga | 34815517 |
| taactgatct  | tctgatttgg | aggcagagag  | cttgtgatct | tagccagttc | 34815567 |
| ttgcatctta  | cagcacaagc | ctcataagag  | gcagcaccca | ccgcttgtca | 34815617 |
| ccaagtagtc  | cccaggtgtg | tcatcgctct  | gaccctttgc | tgtaagcctc | 34815667 |
| ggtatcacca  | cagttctttc | aggctttgcc  | agggagtgag | tgcgagcacg | 34815717 |
| tgttgtacga  | actccctcca | gttagcttctg | gtagataggt | gagaactgca | 34815767 |
| gtctaccct   | cacccatgga | cagagcctgg  | gactgagggc | aaggaccag  | 34815817 |
| cctgcttgca  | gctagagccg | ggtgtgagcc  | taagggccaa | tcatgggtct | 34815867 |
| gagtgagagc  | ttcactttga | ccgggcaaag  | ctaaacaagg | gtcaatgagc | 34815917 |
| atctcctccg  | gagagccagt | ttgtaaatec  | ttccaggtgt | ccagggta   | 34815967 |
| tacctctgta  | ccaactaacc | aactccaccg  | ctgtggcgta | aagacagcag | 34816017 |
| actgtgga    | gtttatgggc | actgaaataa  | gaatgtcatg | caatttcctc | 34816067 |
| atgtcataaa  | attgttttca | ttatattaaa  | aatatgtatc | aatatatttt | 34816117 |
| aatatattaa  | tgtaattac  | acacacatac  | tacttaaata | gcacttttgg | 34816167 |
| tttgccagct  | atgtgaaacc | aaattgcata  | agtcagtaca | aaaaaggttt | 34816217 |
| tttgtgcagt  | agatgatggg | taacagaaac  | tcacagctgg | tcaagtatgc | 34816267 |
| gggaaatgag  | tatcgttgga | atgccagcc   | acaaatgagc | tgtcgatatt | 34816317 |
| gtattcatcc  | caaaactcgg | gaccacctca  | gtaaattggg | cagaaagacc | 34816367 |
| atgagatcca  | gaagtagagg | agggctgggc  | tggaacagtg | tcttctgggc | 34816417 |
| aagacagggc  | tgatgcagtc | atgagcccac  | agcagctgtg | gctgcctgca | 34816467 |
| tgagaccctg  | acaagatcca | tccagttaac  | attctagcat | ggagcagggg | 34816517 |
| agggctcacc  | agcccctagc | cctagctaat  | gagctattgg | tagttagtgg | 34816567 |
| cttctggagg  | aaaaagaatc | tgttttcttt  | aaggggtgtg | cccctggttg | 34816617 |
| gcctgtcatg  | ctccattctc | agaatata    | gaacagcata | gattggactc | 34816667 |
| actgagtaa   | tcaagcaaag | caaaacaaaa  | caaaaggac  | acaaagttgc | 34816717 |
| aggctgagat  | gggaaccgat | ctggtaggga  | tgagggggag | agttgggaag | 34816767 |
| accatgacca  | aagtacattg | tatgaaattc  | caaagaaca  | tatatatata | 34816817 |
| ttgcaacata  | taaatacata | ttatatgtta  | tattctaaat | aatattaaat | 34816867 |
| gtaaattgatt | agatattata | atatatattt  | aatatcgagc | atggggtaga | 34816917 |
| tcttggctat  | ccacactttt | cccactagag  | ggcaatagtg | cttaaattcc | 34816967 |
| cttccgtagc  | ttctaactag | tccaaacaag  | cctctaggct | gtgaagtgg  | 34817017 |
| ttttttttgg  | gggggggggt | gttttgtttt  | gttttttcaa | ttttttatta | 34817067 |
| gatattttct  | tcaattacat | ttcaaattgct | atccaaaaag | tcccctatac | 34817117 |
| cctccccgcc  | ccaccctctg | ccctgctccc  | ctaccactc  | actcccactt | 34817167 |
| cttgaccctg  | gcgtttcctg | tactggggca  | tataaagttt | gcaagaccaa | 34817217 |
| ggggcctctc  | ttcccattga | tggccgacta  | ggccatcttc | tgctacatat | 34817267 |
| gcagctagaa  | acacaagctc | tggaggtact  | ggttagttca | tgttgttgtt | 34817317 |
| ccacctatag  | ggttgcagac | cccttcagct  | ccttgggtac | tttctctagc | 34817367 |



|             |             |             |            |             |          |
|-------------|-------------|-------------|------------|-------------|----------|
| tccttcatta  | ggggtcctgt  | gttccatcca  | atagatgact | gtgagcatcc  | 34817417 |
| acttctgtat  | ttgccaggca  | ctggcatagc  | ctcacaagag | acagctatat  | 34817467 |
| cagagtcctt  | tcagcaaaat  | cttgctagca  | tgtgcaatag | tgtctgcggt  | 34817517 |
| tggtggctga  | ttatgggatg  | gatccccagg  | tggggtagtc | tctcaataca  | 34817567 |
| gaaaatgtgg  | tatatttaca  | caatggagta  | ctactactca | gctattaata  | 34817617 |
| acaatgaatt  | tatgaaattc  | ttgggcaaat  | ggatgtatct | ggaggatata  | 34817667 |
| atcttgagtg  | aggtaacca   | atcacaaaag  | aagtcacttg | atatgcactc  | 34817717 |
| actgataagt  | ggatattagc  | ccagaaaactt | agaataacca | agatacaatt  | 34817767 |
| tgcaaaacac  | aagaaaatca  | agaagaaaga  | agaccaatgc | atggataactt | 34817817 |
| cattcctcct  | tagcataggg  | aacaaaatac  | ccatggaagg | agttacagag  | 34817867 |
| acaagtttg   | gagactacca  | cccggggatc  | catcccataa | ttggctgtga  | 34817917 |
| gtttcttaac  | tctgtatcat  | gacgtgctct  | gagccagcca | acagcttctt  | 34817967 |
| tcttcagcag  | ctagaaggaa  | tcaggggttg  | ttcatccaaa | aaagcaagct  | 34818017 |
| ttcctaatac  | ttgccatgca  | tgttgggaca  | gaggagacag | gctgacgaca  | 34818067 |
| gtcaagtact  | gtgctgggta  | tctcggggtt  | taggggtgtc | attgttacaa  | 34818117 |
| aaataaaaagc | aaaaggtacc  | cagtccttcc  | gatggtaaga | gtctgacccc  | 34818167 |
| taccttcctc  | ccccctcca   | cccctcccag  | ccctactttt | atggagtgca  | 34818217 |
| atggattgat  | tgggaagggt  | ctcttccctc  | cctcttgctt | ggcagtctct  | 34818267 |
| gcaaacactg  | tcttgagac   | atgaagtgtt  | gttatgtgca | aatgaaaaca  | 34818317 |
| ttgctttgtg  | gggagggtg   | tttctcacta  | aatggcccgc | ctctcctgcc  | 34818367 |
| tccctccctt  | aattttatga  | ggtgcaaact  | aggactgggg | gcctggcaag  | 34818417 |
| agaaggagca  | gacagttgct  | tcccatatag  | cagatgaaca | cattcctgct  | 34818467 |
| agcaggccag  | acccttcagt  | gaggagacag  | actatttccc | tataaataaa  | 34818517 |
| ggttccgtta  | cagaatgata  | ccgttttaga  | gcatgcagta | ttatggatgg  | 34818567 |
| cactggcgct  | cactgcttac  | aacctatagg  | actgcatata | aagagggttt  | 34818617 |
| ctagtagaag  | gaccattcat  | tttctgttct  | caatatttat | ccttcccttg  | 34818667 |
| aatgttaaag  | tgtagcttat  | cacgcagagg  | aatgaacat  | aattgtggca  | 34818717 |
| atggggagga  | gctgctgcct  | tgcttttgat  | caatatctat | aatgggaaat  | 34818767 |
| ggaatcatta  | ttttggaggc  | acctcaaagg  | agctgagagc | cgcatgttca  | 34818817 |
| gtctgggtga  | ggtctactct  | gcctgagcct  | gggctgggga | ccaaaagacc  | 34818867 |
| ctgcaggatt  | cttcccaggt  | gtgtggaatg  | gagattatcc | caaaatgcca  | 34818917 |
| gctgtctgtc  | cttgctgtcc  | tgcatgccaa  | attcttccag | agtgactctg  | 34818967 |
| ccatgtcttt  | ccaggcctgc  | tgttgtcctc  | catggatttg | ggccagccca  | 34819017 |
| agcgtcatga  | cagttgcccc  | gctggggaca  | gggatggagc | actaccacca  | 34819067 |
| ggtgctcctg  | gcctgagccc  | ttctatgctt  | tcctctgcag | GACAGCCCAT  | 34819117 |
| CCAGTTTGCT  | CACTCCATCT  | GTGAGGCAGG  | CGTGGCtGAG | CTCCACATCC  | 34819167 |
| AGGATGCCCT  | GCCAGAGGAC  | CGTGGCACCT  | ACACCTGCCT | GGCTGAGAAT  | 34819217 |
| GCCATGGGgC  | AGGTGTCCTG  | CAGCGCCACT  | GTCACCGTCC | AAGgtaggat  | 34819267 |
| ctttcaagca  | cactgctaga  | tgtatttccc  | ctaccgacga | ctgtctgcat  | 34819317 |
| tgaagaaaga  | atgtttatag  | accgtaggat  | ggctggccca | gatccaagga  | 34819367 |
| gctgaactgg  | aatctaagtg  | gaattgtggg  | ttctggcagg | cagctgcaga  | 34819417 |
| gcagaggggc  | tcttgacca   | tctagggaca  | aagcacgggt | tgcaagaaa   | 34819467 |
| gtcttgagca  | taggcacgca  | gcagcacagc  | taacatccca | acactagggg  | 34819517 |
| acatgagaaa  | atcctgattt  | ccaggccaac  | ctgagatata | tagaaagcaa  | 34819567 |
| gacctgaca   | aataaaaagga | aggaaaaaag  | aaaggaaagc | aggaagagga  | 34819617 |
| gagaggggaa  | gtccctgacc  | tgacctcat   | ggcaggcaga | tggagagat   | 34819667 |
| ggtctctggc  | aatcctcagt  | aatccaaggg  | attggagggg | tcccttgacc  | 34819717 |
| ccactggctc  | atggacactg  | caagacttta  | ggagggtatt | cacgtgtcat  | 34819767 |

|            |             |             |            |             |          |
|------------|-------------|-------------|------------|-------------|----------|
| tgctatgcaa | ggtctcacia  | atggctctgt  | gccctcagga | actagtgggtg | 34819817 |
| aagcagattc | tgagactcct  | gaagaatcac  | tgggtattcc | tcacctaccc  | 34819867 |
| gaccagccc  | ttccccatc   | cacgcttggt  | ttctaccatc | accagcctgt  | 34819917 |
| tgccaagcaa | tctgattatc  | acagtcattc  | attgatcccc | cagcacttag  | 34819967 |
| tcgccagggg | tctgcaggca  | ttgtgtaggc  | tggagactga | ccctgctggg  | 34820017 |
| ctgtgggtgg | ttatggtgcc  | tgtttctagg  | aaaggaaggt | gtccaggccc  | 34820067 |
| gcaggtaagc | ttgggtcccac | ctttccttag  | cttgtgcctc | cagctcctga  | 34820117 |
| gagtgactgt | gccttctgaa  | tgcttagact  | gggtagagtg | tgctgcctt   | 34820167 |
| ccctgtcagc | caagcagaaa  | acgacacctc  | atctcttttg | tcctcacata  | 34820217 |
| atcaggcct  | cacagaagag  | ccctcttggg  | gtatgaacag | ccacattctg  | 34820267 |
| ggtggctgca | tgagatgggg  | tgacagaaaa  | gggacacaa  | gccttctgcc  | 34820317 |
| taccctcatg | agctgtacca  | cctcacagag  | acccttaggg | ctcagggcgc  | 34820367 |
| agtgttgacc | ctgttttata  | cagaacgggtc | taatggcctt | gacgtcagtg  | 34820417 |
| aaacttggac | agcacagggt  | aataggtaaa  | gctggcttct | gagcccaggt  | 34820467 |
| cctgggacag | aggcctaggt  | caccccataa  | ctggcctttc | tcagaggact  | 34820517 |
| cctcccatga | cccgaagtca  | gaggctggcc  | gcaagagaaa | gagagctgtc  | 34820567 |
| cttccctagg | gctcagggga  | attctctaac  | agagaatgtg | gtccatggct  | 34820617 |
| gccctgtgca | tccatctgcc  | aggagagact  | tggatttctc | tgaagaaatg  | 34820667 |
| cctctgtgtg | gagtcattgtg | tgaaccagtc  | tgccccttcc | ttccaggaag  | 34820717 |
| ccttctacac | tggggtcaga  | gctagcagtg  | gcctgtgaga | tcttttctgg  | 34820767 |
| tccacacatg | aaaccaactt  | atctccatag  | ttctcatggc | atggcttggg  | 34820817 |
| ggcctcaggg | gacatagtat  | gagacttcca  | gggaagcaca | gttcacagcc  | 34820867 |
| tggctcttgg | agcccagggc  | agtggctttc  | ccctttttcc | cagaggctag  | 34820917 |
| acagtctgca | gtgggcaaga  | aagtacgaat  | gatataggct | gggcctcctt  | 34820967 |
| accagctctt | gtgtggacag  | cttctctgca  | tagtcagcta | atccgctgtc  | 34821017 |
| tgctccaac  | tgtttgtggt  | taagttagat  | tagaggctca | gctaacagtc  | 34821067 |
| tctctgtgtc | tctctgtttc  | tctctctctc  | tctttctctt | tctctctctc  | 34821117 |
| tctctctctc | tctctctctc  | tctctctctc  | tctctgtgtg | tgtgtgtgtg  | 34821167 |
| tgtgtgtgtg | tgtgtgagag  | agagagagag  | ggagagggat | agagacggag  | 34821217 |
| ggagggaggg | gagagagagg  | tggggagaga  | gggggagggg | gagagagagt  | 34821267 |
| taggtaaggg | gtcttcagat  | gaaggataga  | gaactctgag | gtgttcacct  | 34821317 |
| gatgctgggg | tgttgggaag  | gctggggagg  | gttgcatggg | tgcccatcta  | 34821367 |
| agtatgtctt | aaagaaaaag  | gagaaaagct  | gccacgtagc | tccatcagga  | 34821417 |
| cccctggatc | tgctgtcagc  | agcccagtgca | gtgagtgccc | tcttgggtgg  | 34821467 |
| gggatctgct | ggcctggcca  | agccagactg  | aggctcagaa | ccataaatgg  | 34821517 |
| aaaataagac | agacacaacc  | acttgggccc  | aatgcagact | tcctgcaca   | 34821567 |
| gggctggcag | aggaagcctg  | gcacagtgac  | atctctggct | ccctgcccc   | 34821617 |
| aggtgcttta | gaggttccaa  | gcattatctt  | gcaaccatca | ccagtgttgg  | 34821667 |
| agttactctg | actttcttag  | cagctgctct  | ggctccagac | ccctgggagt  | 34821717 |
| tgctagggga | catattccca  | cctgcttcat  | ttgctgctct | gtcctgcctt  | 34821767 |
| aaagctaccc | aggctccggt  | ctgtccctct  | ccgtgtggca | tgggtggaaag | 34821817 |
| tgtgattcca | aagccagctg  | cctgacctga  | attccattca | ccacttccca  | 34821867 |
| gtcctgacac | cgggggtgtca | actctccagg  | caccaccttc | ctctgtgtga  | 34821917 |
| catgggagcc | ctggcacatg  | aggactaaat  | agacggatgg | cgccttgtcc  | 34821967 |
| acagaccatg | gaatgttcca  | tatgtgccgt  | gatgctgggt | gtccaaactt  | 34822017 |
| taaacaagaa | tgtcccagga  | agtggtttta  | cgaaaaaatc | aacctcttga  | 34822067 |
| ttatctgtct | gataggtaaa  | gaacaggtgg  | gattggaagt | tcaaggctcag | 34822117 |
| cctgggctac | acagctccaa  | acgtgagaaa  | catgagcaat | tgattgagac  | 34822167 |

|             |             |            |             |             |          |
|-------------|-------------|------------|-------------|-------------|----------|
| caacttcag   | ccatgggctc  | ctgtggtgca | cctcaagact  | ctgaccacaa  | 34822217 |
| gatgtcgcag  | tgcggcaatg  | cattaccttc | cacttgccgg  | gtttttcccc  | 34822267 |
| ctgtgaggag  | ctgattctgc  | agctgccatg | ccccctccac  | acacacacac  | 34822317 |
| acacacacac  | acacacacac  | acacacacac | acacacacac  | accaccccct  | 34822367 |
| cgttctttcg  | agacttgagc  | gcaaattcta | tgctgaacgt  | ggaccactct  | 34822417 |
| gcttgtctct  | gtagttgtac  | tctgaaagcc | tacctagctc  | ccacaaacga  | 34822467 |
| tgccactttc  | ttccagaagc  | cttccctatt | cacctcagaa  | taaaccctgt  | 34822517 |
| taacactctg  | cgcccttgt   | tgcactgact | tactttttgc  | taagtacctg  | 34822567 |
| cattcatctg  | gtctggggac  | actgtaagac | acaggtcaga  | caaaggcccc  | 34822617 |
| accctacca   | tcctccttc   | tgatggcgac | ggagctagct  | taacgacaca  | 34822667 |
| tgccaattca  | tgctcttgag  | gaaatgaata | gaggtcagtg  | cttgcttgcc  | 34822717 |
| atccttatac  | ccctgtgctg  | gatgatgttc | taggcaggcg  | acaggcagca  | 34822767 |
| cagccagtgc  | tcagaccctg  | gggtgggagc | agcaccagcc  | tactcgagat  | 34822817 |
| gcccacggtg  | gctggagcca  | ggggaacaat | ggcaggacat  | tgctggaggg  | 34822867 |
| agttgtgccc  | tgcaggccct  | cgtgggttca | ggaattaact  | gattgcttgt  | 34822917 |
| ttaagcatct  | gcagtcttcc  | tgtagggaga | cccgttgtcc  | tctgttgtt   | 34822967 |
| gtatntagca  | cagggcctgt  | cctgtgagcc | cttgtgagca  | ggtgagcagt  | 34823017 |
| gacagagagc  | aatgaggtgg  | acaagtcttc | cctacatgca  | gggaggcatt  | 34823067 |
| acctcaactt  | ccccagtcct  | caaagatctc | agtgctctct  | tatggtttta  | 34823117 |
| agagacctgc  | gaattagctc  | tcaacagccc | ctcatcaaat  | atacctgttt  | 34823167 |
| ccccatcact  | aaccaggcaa  | catagccttc | cctccccatc  | caaatggatg  | 34823217 |
| aatctaagtt  | cctgcagtgt  | tctggaagat | ctaaaaacag  | ttaataactc  | 34823267 |
| tgtattatca  | ggtctgagtc  | ctgggcaggg | aacttccttg  | ggctaggata  | 34823317 |
| ttttcaaatt  | acacccccac  | acataacac  | acagtatctg  | tgtcaaggct  | 34823367 |
| aaattctctt  | tttttgacgg  | gggtgggggt | gggggcttgg  | ttttttgaga  | 34823417 |
| cagggttttt  | ctgtgtagcc  | ctggctgtcc | tggaaacttac | tctgtagacc  | 34823467 |
| agactggcct  | cgaactcaga  | aatctgcttg | cctctgcctc  | ccgagtgctg  | 34823517 |
| ggattaaag   | tgtgcgtgtg  | cgccaccact | gcccggccaa  | ggctaagttc  | 34823567 |
| ttaagcaaca  | agatgaatta  | ctagtctgct | aattgtacct  | atthttgacat | 34823617 |
| ggttcctcga  | ctaattggttt | gtttgtttaa | ctaaaggcat  | gctgagcctg  | 34823667 |
| ttaaaggttac | ctaaggacat  | aaaccatgga | ttaggttaaa  | aaaaaaatct  | 34823717 |
| gatgtgaaat  | atgttttatg  | aagacatttg | ctagagaaga  | gttcctaattg | 34823767 |
| aggaaaacag  | ggcccttaaa  | agcaaccaag | ttcttgactc  | tgaacaccta  | 34823817 |
| ggcatgtggc  | cactcccagc  | ctcctcctcc | tctcctcctc  | cctcctcctc  | 34823867 |
| ctcttctgct  | cataccaact  | ctgggtgtgt | catttgacc   | ttatatcatc  | 34823917 |
| tgtctgctgc  | tggcctaagt  | cacggatgct | gccctctggc  | agacgaacac  | 34823967 |
| actggtcacc  | tttctaacc   | tttactcca  | gagagtcctt  | gaaggaggag  | 34824017 |
| aagcagcatt  | gtctgtatgt  | agcctgctgt | ttaaagctat  | cctgagaacc  | 34824067 |
| tcggctctgcc | cgagcatctg  | ctcaggcttt | gaaacttaag  | ctaagcagcg  | 34824117 |
| agctaagggg  | agtcgggtgc  | tccccagctt | ttcattgtct  | acaggctggg  | 34824167 |
| gccttcacac  | tgggaggagg  | tgtgcaggcc | acgatgtgtg  | cttctggctc  | 34824217 |
| agagctcaga  | actggagcct  | tgctttactg | attggacaat  | tatagaggct  | 34824267 |
| catcactgcc  | cagctttaca  | gccctttgta | gaccataggc  | ccccatttcc  | 34824317 |
| tggctcacag  | accttgacca  | aaaataccat | tccaagtgaa  | aaccttatgt  | 34824367 |
| tcccagtgcc  | aaaatgtgcc  | ccagttagga | cagcacaac   | ggtagtatag  | 34824417 |
| ttccggggcc  | tcgctggcaa  | agaccaactc | cttgccctgtc | tgtttagagt  | 34824467 |
| gtgattataa  | ctgctaagac  | cttaagaag  | ctgaggttgt  | agtggctcct  | 34824517 |
| gcctctcatc  | tagcagccct  | tcattactgg | ttagatcttt  | tgtgagatgc  | 34824567 |

|             |             |             |            |            |          |
|-------------|-------------|-------------|------------|------------|----------|
| catgtgtctt  | gtcccttttg  | tgagatgcca  | tacatcttgt | cccttttgtg | 34824617 |
| agatgccacg  | cgtctccctt  | tcgctctctt  | cctcacacac | gcctctttcc | 34824667 |
| atttgcttct  | tcagttgtga  | gaagtccagca | gtagaaagaa | aggccaaaaa | 34824717 |
| tgccatcaaa  | agcagtcctt  | ttgctgagtt  | tccaagaagg | cttaggagac | 34824767 |
| agacttttgt  | tgaaagggaa  | ttcagatacc  | tccccaggg  | acttacagct | 34824817 |
| tgccaagcct  | ccctggaaat  | gggaaggggc  | tgggctgcct | tcctgcaagg | 34824867 |
| ccaagaaatc  | aagccctgga  | atgtgggaga  | ggaggcactg | gtccctgatg | 34824917 |
| ctggggacat  | actgcattct  | gagcatcaaa  | taaaagaagg | gggtaagatt | 34824967 |
| ggctatagag  | cccttcaatt  | ggtgatttat  | tgaaattcca | tagaatagca | 34825017 |
| gggtcagagag | ggaatccaat  | ttgctgttgg  | aatggcattt | tgcatgtg   | 34825067 |
| tagctaaggg  | aatggtttg   | tgttcaagaa  | ctaaagagat | cttttagtag | 34825117 |
| atccaagatg  | aagcccgaca  | tgttcattta  | acacatgttt | tgggttcata | 34825167 |
| aactcagggg  | cttctgaaag  | cagcaagctg  | gccagcatag | gttgtccagt | 34825217 |
| ggtgggggta  | ggggtgatga  | tggttttaag  | aaattcagaa | tcgagttatg | 34825267 |
| ttcctactt   | aactcatagg  | aagttgagga  | aggacggtag | agaggggaaa | 34825317 |
| gaaggaaatt  | tgttagagta  | ccaagaaaca  | ctgcagccag | gaccagccat | 34825367 |
| ctggagggaag | tggtggatgg  | ctcattatac  | caggtccaga | aggagccgaa | 34825417 |
| ggctttgctg  | gtccatgttt  | aaggagcagc  | tggtattgct | tattgtactg | 34825467 |
| gaccaggtgg  | gtatacaaca  | caatgagctg  | cttcgtcttg | tgggtgctga | 34825517 |
| atttttccaa  | aacgttgcat  | ttgttcttga  | actgaggtca | ccattagtgt | 34825567 |
| ggggctttca  | aggggaagct  | ctgaaaggaa  | aagcatgatt | gtgtagacag | 34825617 |
| ggtggcttgc  | ctcagtgctt  | ctcatacaac  | ttttcacctg | ctgctgagct | 34825667 |
| attttatcag  | tggcccatcc  | ttggttgtat  | ttcctgtcct | ctccaggacg | 34825717 |
| gtgtgagcct  | gcctcttctc  | tcagtggaac  | cttggcagtc | agttcaatgc | 34825767 |
| ggcacaccgg  | aacccaaacc  | ccacagcaac  | agaaaaattc | accttggaca | 34825817 |
| gttagtctta  | gactagtgtg  | aagctctagt  | ttctagactc | tagaaaggca | 34825867 |
| gtctctctc   | tcgggcttg   | ctctcagcag  | gagcaggaag | cacggctgtg | 34825917 |
| ggaaaagcct  | ggggtatatt  | tagtctagcc  | cccgtggag  | ctggatacag | 34825967 |
| ggcatccacc  | cctggcccca  | gtaatcactc  | ccttggagtc | tatatactgt | 34826017 |
| gggagcccag  | tgccctgcctt | ccagatgagg  | aaggctggag | gtctctcacc | 34826067 |
| cctgaggctg  | gcttcttatt  | gtgacctcaa  | agcaagacat | tcccagagta | 34826117 |
| atggacctct  | gggttaacag  | cagccctggg  | cacgggcaca | gtatttggta | 34826167 |
| gtgtcttagg  | gttttactgc  | tgtgaacaga  | caccatgatc | aaggcaagtc | 34826217 |
| ttataaagga  | cagcgtttta  | ttggggctgg  | cttacagggt | cagaggttca | 34826267 |
| gtccattatc  | atcaaggaag  | tttgacagca  | tccaggcagg | catggtgcag | 34826317 |
| gaagagctaa  | gagttctaca  | tcttcatctg  | aaggctgcta | gcagaagagt | 34826367 |
| ggcttccagg  | gagctaggat  | gagggcttta  | aagcccacat | ccacagagac | 34826417 |
| acacctactc  | caacagggcc  | acaccttcta  | atagtgccac | tccttgggct | 34826467 |
| gagcatacac  | aaaccataac  | aggtagtatt  | tgggtgacct | gccctgttct | 34826517 |
| tagatcccca  | gagagaaagc  | aagaagcctg  | accagctctg | ttgtattctc | 34826567 |
| atgcctctta  | gccactgcag  | tgccagccctg | gggactcagg | aaggccacct | 34826617 |
| tcctcccttg  | aatgggagtc  | tgctcgccca  | gattattgtc | agaactttt  | 34826667 |
| ccagctttac  | ctccatggct  | gcggttgatt  | gactctgctc | aatcaaaaca | 34826717 |
| gccagtgggg  | ttcaagaaag  | caaatcgttt  | gtttatatac | tgactgggtg | 34826767 |
| taaaagttgt  | agactctttt  | gaggtaggcc  | ttgaactccc | tgcgtaaccg | 34826817 |
| aggctatgag  | tctgaattcc  | tgatcctcct  | gcctctccct | ctagactgct | 34826867 |
| gggcttcgtg  | agcatgcact  | ctcatgcccg  | gctgtatgtg | gtcctgggtg | 34826917 |
| ttgagcttgg  | cttaatttgt  | gcactctgcc  | aaccgagcta | caaccccagc | 34826967 |

|             |             |             |             |            |          |
|-------------|-------------|-------------|-------------|------------|----------|
| cccacagctg  | tgttgacata  | gtttccttaga | gtcatctaaa  | agtcctgcag | 34827017 |
| cgggatcaca  | gtacacgctc  | tactcatcta  | ggttgtgttt  | tattgttggg | 34827067 |
| aataatgaac  | atacatggtc  | taccttttgc  | ctgtctggtc  | tctgctctgc | 34827117 |
| ttttcttcag  | ctgtcaaaaa  | taggctttat  | gaatgagctg  | caatgtgctg | 34827167 |
| tcctccgtgg  | tactgtcaca  | gcccgctgtg  | gtcagcactg  | gagagtgctg | 34827217 |
| gtccctttg   | gagaggcatc  | tatgggtgtac | cctgccttgt  | cctcgggagg | 34827267 |
| cctgggcaag  | tgatccatcc  | tggccatcct  | tctctggctg  | cgtggccact | 34827317 |
| gtaacacatc  | ctgggctcac  | tcagtgggta  | gtggtttggg  | actgaggatc | 34827367 |
| caggaaacta  | cttcaggctc  | ctcttctcag  | ggcgtctaaa  | ggaagccact | 34827417 |
| tacttggaac  | ccaattgtgc  | cttccctggt  | gtcttagacc  | cagttcagcc | 34827467 |
| catgttcatt  | agaagggttg  | ccattttctc  | accccatgaa  | gaacttgggc | 34827517 |
| ttattcactg  | ctgaccctg   | acctgaattc  | aggatcatca  | tatcccagat | 34827567 |
| gattaacccc  | acacctgctg  | gagggattca  | aaacaaacag  | ggacaccaac | 34827617 |
| ctgcagactg  | gagaacaaat  | tatttcctcc  | cgttgtccct  | gtaggactaa | 34827667 |
| agggaaagaaa | gagcgggtag  | ccactctgga  | tccaaagcct  | gagctgtttc | 34827717 |
| ctcggactcc  | tctcttgggg  | aggtgcagtg  | aagttccact  | agtttatttt | 34827767 |
| tagatctgtc  | ccatgggtctc | tctaagcatg  | acatcacaga  | acttgctttg | 34827817 |
| ggccacttaa  | aaacaaacia  | acaacaaac   | aaacaagtca  | aatcataatc | 34827867 |
| gtcaggaagg  | ctcaggatcc  | acgacttctt  | aggctactga  | taggtccact | 34827917 |
| gtgtgactct  | aggcaggcag  | gagtcggcca  | gttctcagga  | gatgtctata | 34827967 |
| aatggcattg  | atgagtgtag  | acaacgtgga  | cttagggagg  | ttcaacttgg | 34828017 |
| aattttcaat  | tttatattgt  | tgtgaggagc  | agacagacc   | agtcagcatt | 34828067 |
| gtgaccccaa  | gatgtctgtc  | agcattgtga  | ccccaaagatc | aaacagccag | 34828117 |
| tcccctacag  | caagctgtgt  | tgctaagctg  | ccatactctg  | cagagctgtg | 34828167 |
| tcaccgagct  | gccatattct  | atagagctat  | gtctctgagc  | ttcaatgctc | 34828217 |
| tgtagacctg  | tgtcactgag  | ctgccatact  | ctgtagaact  | gtgtctctga | 34828267 |
| gcttcagagc  | tgtgtttctg  | agctgcaata  | ctctctgtag  | tattcggttc | 34828317 |
| accaaagtca  | ttttaactt   | accatacttt  | gttgcttata  | gtaggtttat | 34828367 |
| aggaaaccac  | actaagttga  | gaagcattgt  | ggttgcacat  | attgttttca | 34828417 |
| agttctgtct  | tcaaaactcc  | ctgaaactct  | gagacaacc   | tagagacagg | 34828467 |
| tgaaggtgtg  | gggcttcagg  | tagaggccta  | tttacagttc  | agatccagct | 34828517 |
| ccaagtctca  | ggtgtctacc  | tgtgctggct  | ttttgttgtt  | gtttttgttg | 34828567 |
| tttattttca  | ggttgccaca  | acttagagtc  | atccagagat  | actgtaacct | 34828617 |
| caactgaaaa  | aatgccccca  | taaaaatcaa  | cctgtagaca  | atagatgtct | 34828667 |
| agagagccca  | gccactgtg   | ggtgggtgtt  | cctctaggca  | agtggtcctg | 34828717 |
| gatagaataa  | gaaagcatgc  | taagccagcc  | ttaaggacaa  | accactaagc | 34828767 |
| agcgtttctc  | catggcctct  | gcttcagttc  | ctgctttgag  | ttcctgtcct | 34828817 |
| aactttccac  | agtgatggag  | tttgacctaa  | gagttataaa  | ctggaaaaaa | 34828867 |
| aagtttcctt  | cctaagttgt  | ttgggtcatgg | tgttttatca  | cagcaataga | 34828917 |
| aacctaagac  | ttgtccaggg  | cacgggccct  | caggcataga  | cccagcaagc | 34828967 |
| tgccatggtg  | gggtacaaat  | ctccccctc   | cccccaatgc  | ctttcttagc | 34829017 |
| tcccagggca  | ggttgggtgg  | tgtaaacaga  | tctctagact  | ctagcagcca | 34829067 |
| ggatccagag  | tgctgtggct  | ttcctggagc  | tcagggtaaag | agaacaggca | 34829117 |
| ataggaagaa  | gtgagagaga  | atgaccagac  | ctggaagagc  | agacagtcag | 34829167 |
| tccaaaaggc  | gagcaaactg  | ggattagatg  | ctcctgctgt  | accagaagg  | 34829217 |
| agttccaatc  | catctgtatg  | gagctcgtgg  | cttgggctgt  | gaggcagaga | 34829267 |
| ttcaggaaca  | aggagtctc   | tgacagagggg | aaacattttg  | tcctccagcc | 34829317 |
| ctctcagtct  | gtgaaagaca  | ggaaattcct  | caaccctcca  | gaggcagcca | 34829367 |

|            |            |             |             |            |          |
|------------|------------|-------------|-------------|------------|----------|
| gctttcctga | ccacggcagt | ccaggctaca  | tgaggtagat  | ctgtgcgttt | 34829417 |
| ccaatacagg | ctccctaagt | ccactctcag  | agcctcctgc  | caatagtcct | 34829467 |
| ccagcagccg | cactccatca | aaagacaatt  | ccccgaactg  | ggggcagggg | 34829517 |
| ccaagaccac | tacctggtgg | ccagaggcgg  | gacagaacag  | atctgtgtta | 34829567 |
| gttgctcttg | tgtgcttggt | ccttattctc  | cctgcggcag  | cctctctgag | 34829617 |
| gaagcgttac | tctgaccttt | attcaatcct  | ctgagcctca  | tcctcccatg | 34829667 |
| gtcccaaagg | ctgggctggg | agagcttagc  | tttcggtggc  | cacaggtaaa | 34829717 |
| aattaacatg | ttgtgaattg | ggccttaatc  | tggtagagaa  | agcaccctgg | 34829767 |
| aaactatccc | tagagtccta | gagtttgaaa  | gaaagtttgg  | aatttgtttc | 34829817 |
| cctatggtgg | tggagacca  | aagtactaga  | gtcctccctt  | gatctttgat | 34829867 |
| ttttaaatga | gaggtattcc | attgtattag  | tctggtttct  | gttgtaacaa | 34829917 |
| aatacccaaa | gatggatact | ttgcaaagag  | gttaatctta  | gttcttagct | 34829967 |
| ctagaggaca | caaagcatga | cacagatctc  | tgcagaggtc  | ttcacaaaag | 34830017 |
| cttcatgctc | tgtcctgtca | tggccgagaa  | gcaatagaaa  | tcggtgcatg | 34830067 |
| tgatagcacg | tgctgaagac | caccagtgca  | ggttccaggc  | tcactttaga | 34830117 |
| acacgccact | ctcacatgca | ctaateccagg | tctatgagac  | ccatctcact | 34830167 |
| cttgagagaa | ctaaagaact | ttaccagtct  | cttgagaaaag | acgttaatcc | 34830217 |
| ctttataggg | gtggtgactc | catgacctaa  | tcacctctca  | ggggacctct | 34830267 |
| ttctagtgcc | tccatattga | ggatgaattc  | tcatcatgac  | tcccaaggat | 34830317 |
| caagtagaac | ctttgccgat | ctcagaccct  | gatttgatac  | cgactactac | 34830367 |
| aaacaaacag | aaagtaataa | cttgttgttc  | accctgagtt  | ttagttcaaa | 34830417 |
| ccatagcgcc | tggcctacta | atattactcc  | ctatagtacc  | agaaaaaaaa | 34830467 |
| aaaaaaaaaa | aaaaccacaa | cagcaaaatg  | ctataggagg  | ggctagacac | 34830517 |
| tggacagcct | ggggcttgtc | ctgcatgaga  | agcagacaat  | gccttatctc | 34830567 |
| ctggagactg | gttgaagcca | gcctggggta  | ggatggcaag  | agtaggggaa | 34830617 |
| agtgcctctc | tgaaaagcta | tctcctcaga  | gagctgagag  | ggaggaggtg | 34830667 |
| gaccaggcct | gcaccagaa  | agctgtcgtg  | gtcttcgtcc  | tttattagct | 34830717 |
| acctttgtgc | ctttcccaga | ttttactcaa  | gtattatgaa  | ggtacagtaa | 34830767 |
| gctgcatgta | ttttaggagt | ttaacttaaa  | tgagttttgg  | cagacatgtg | 34830817 |
| aatatccatg | aaacatttac | cctgacctaa  | aaaagtgaac  | atctctgttt | 34830867 |
| ctcttaagca | ttccttactg | ctcttttcta  | atccaccccc  | acgcccctgc | 34830917 |
| cgcgggcacc | caatgatatg | ctttcagtct  | ctctagtttg  | gggtgtgggg | 34830967 |
| tgtgtgtgtg | tgtgtgtgtg | tgtgtgtgtg  | tgtgtgtgtg  | tgtgtaagag | 34831017 |
| agggagagac | agagagaaac | caagaagagc  | tgtaggatga  | agccaacgct | 34831067 |
| ttacctcaca | caggtgagac | tattgctcca  | tccttagtca  | catcccaccc | 34831117 |
| tgtacttttg | ctttgtttag | ctgagatgtg  | atcttaccct  | aagctggcct | 34831167 |
| caggcccact | gttctcttgc | ctcctcagtg  | tggggattat  | cggtgtttgt | 34831217 |
| tgccatatcc | agctttagtt | tattcttcaa  | aaaggggggg  | ggggggagag | 34831267 |
| gaggaagaag | aggaggagga | ggaagtgggc  | ttgggagtat  | aggttggtag | 34831317 |
| tggcacatgt | atztatgtat | gcgatcctga  | acttgatacc  | cagcaccaag | 34831367 |
| aagaaggagt | aagaaggggt | agggaggaga  | agaaagaaga  | aggaagagaa | 34831417 |
| ttaatcagct | gcttactgtg | tcgtgtgcat  | atatcatatc  | tggcgagatt | 34831467 |
| aagaagagct | ttgtttgctt | ctggggagac  | agtgtcaggg  | agccaggttg | 34831517 |
| ggagggagac | tttacacaga | cccttcggta  | gcttttgat   | tctgtaccac | 34831567 |
| atgagtgtat | cacttaagtc | aaaggattaa  | aaagaattta  | aagaggaaaa | 34831617 |
| agtctttatg | aagatgccca | gtgtgagctt  | cctcgctgag  | gtcctcctga | 34831667 |
| ggaaccacga | cgtgtttgca | ggggactctg  | tggagcttca  | ctgttcagtc | 34831717 |
| tctgctgtca | ggcctgagca | ttgtcacgctc | gggcagtgac  | aaggggtgta | 34831767 |

|            |             |             |            |            |          |
|------------|-------------|-------------|------------|------------|----------|
| ccttgttccc | agtgatctcc  | aagagcctcc  | cggcacacat | cagacctgaa | 34831817 |
| cttcagcaca | gctatggcat  | ctagtgtttg  | tggggtgcct | gaatgtttcc | 34831867 |
| ctcctgtttt | tatgtctacc  | acacagAGAA  | GAAAGGTGAA | GGAGAGAGGG | 34831917 |
| AACACCGTCT | GTCCCCAGCT  | CGCAGCAAGC  | CCATCGCACC | CATCTTCCTG | 34831967 |
| CAGGGCCTCT | CCGACCTCAA  | AGTCATGGAT  | GGAAGCCAGG | TCACTATGAC | 34832017 |
| AGTCCAGGTG | TCAGgtctgt  | ccagatagct  | ctgtcctcgg | ggtgtataag | 34832067 |
| agagtgatca | tgtggcaatg  | ggtattgctc  | ctagatgtcc | agaaaaccac | 34832117 |
| catggatcca | tcagcaaggg  | gtacaagact  | cttctgctat | ctgggtagca | 34832167 |
| ttctgtagac | tcagggttat  | atgggtccagg | agaaggagaa | gattaagggt | 34832217 |
| aacatggcca | gttccaaacg  | aatgttttagg | gattttgttt | gattgttttg | 34832267 |
| ggttttgttt | ttgtttttgt  | tttgttttgt  | catttggtta | gtttggtttg | 34832317 |
| gtttggtttg | tatttattta  | ttttatttta  | tttttggtt  | ttaaggagtt | 34832367 |
| tcgactcttt | tttttgtttt  | tttaaattag  | tacatattcg | ctgtggaaat | 34832417 |
| caatgtgttt | cacaattgca  | ttttattcaa  | aagtatcctg | tactttaacc | 34832467 |
| acatttagcc | attgcctttc  | ctcgcctccc  | accagcccct | ttccaatttc | 34832517 |
| caaatagtgc | cccttccagt  | tttgattcat  | atgaggaaca | aaacaggggt | 34832567 |
| gtccagtcct | taccctgtta  | atctacatag  | tgatagaaat | cctagcaagg | 34832617 |
| gtgataaggc | aagagaaaga  | aagatgttgc  | aggtaggaaa | tgaggaagtc | 34832667 |
| aaattatcta | at ttgcggac | aatataagcc  | tatccctaaa | agactgtaaa | 34832717 |
| gactggaatg | tttattgtga  | ggacctttgg  | agtcttggat | gttgtctgag | 34832767 |
| ttgttctagt | gagagtttaa  | ggtacaaggg  | agatgatcag | agaccctcca | 34832817 |
| aaaccataca | aagaaaaagg  | cttgcaccta  | ggccaagctc | tcctgggcct | 34832867 |
| ttctggggat | ggcaggagat  | gctcccaaag  | tcccagctcc | atgctcatgg | 34832917 |
| tagagtagac | atgagcacct  | ttgggtgtat  | ctgtggttct | tggttcctag | 34832967 |
| cagtgcctct | gaaaactggg  | ggtgcccatc  | tctgacttcc | tcttcctct  | 34833017 |
| agaccggtaa | acataataaa  | tatgaactgt  | gagaggaccg | gagggcttgt | 34833067 |
| cctgcagagg | atggatgctt  | tttccatgat  | actcccagac | agaggcttca | 34833117 |
| cagagacatc | ccgttggaag  | agataagaga  | cagtgtgcaa | tggccttcca | 34833167 |
| ggcctgtgga | gtctgacca   | cgcagacaaa  | cggccatctg | ctcactctta | 34833217 |
| tgtctcccca | ggggcctcat  | ccctctggaa  | gcagagcccc | gtggtcagct | 34833267 |
| ttcagatcta | aagaagcctt  | cacatgggtca | tcgatctgta | ctcctaacac | 34833317 |
| attccagaag | catagcccgg  | cactgcaacc  | cactgagaac | catgtttaga | 34833367 |
| aatcctctgc | acgctgaggc  | cctgggacca  | cacttgtgtg | gtcaccagc  | 34833417 |
| gcttacagag | ccctttccag  | cgaccgctg   | caaggagct  | gccatgggg  | 34833467 |
| ctctatgtga | ggcggggcgg  | ggcagagaac  | accttcaggg | ttaggtcctt | 34833517 |
| tctttgtgct | ctctgaggac  | agctggcaaa  | gatgagattg | gctcagttac | 34833567 |
| tcctcctaac | aaccctgtaa  | ggcaggggtg  | gggaggaaac | tgaggcagca | 34833617 |
| cgtttagccc | agtgttaaca  | ttctaagtgc  | acagttgctt | cctggctagg | 34833667 |
| gacatccctc | tctgacgacc  | tcctgttgcc  | actctgtgtt | cagGGAACCC | 34833717 |
| ACCTCCGGAA | GTCATCTGGC  | TTCACGACGG  | GAATGAGATT | CAGGAGTCCG | 34833767 |
| AGGACTTCCA | CTTCGAGCAG  | AAGGGTGGCT  | GGcacagcCT | GTGTATCCAG | 34833817 |
| GAGGTGTTCC | CGGAGgaCAC  | GGGCACGTAC  | ACCTGTGAGG | CCTGGAACAG | 34833867 |
| TGCCGGGGAG | GTCCGCACCC  | GGGCCGTCTT  | CACCGTGCAA | Ggtgaagctg | 34833917 |
| agttgctttg | acgggggtcgg | ggtacacctt  | ctgccaaagc | catttagaag | 34833967 |
| tgagggaaac | acaccagact  | actgcagtc   | cactgcagcc | tcagaggcag | 34834017 |
| atcactgtct | ccattgcaag  | ctctcgcaga  | atggggctcc | ccagtctcca | 34834067 |
| aagtccctga | agtctctggg  | ctgcttctta  | gctagacgga | gcgctgagg  | 34834117 |
| taatccataa | tagacttaat  | ttgggattca  | tggtgtgtga | tataaagtcc | 34834167 |

|             |            |             |             |             |          |
|-------------|------------|-------------|-------------|-------------|----------|
| tttcatgagc  | cctttctcct | gcagaaacct  | tttccagagc  | caaggtgggt  | 34834217 |
| aagcctctgt  | aaacacatgc | tgtaagtaac  | cgttctcatt  | gaccacatcc  | 34834267 |
| aatggaaagc  | atgagcatcc | agcccaggac  | cccgtatcgt  | cagggccttat | 34834317 |
| acaaactcat  | attagtactg | tcctctaata  | atataaccaa  | ggcagatctg  | 34834367 |
| cacaaaagat  | gtaccgtgtc | cacataccca  | gtccaagtac  | cttctagacc  | 34834417 |
| acttgttctc  | tggtaacaca | ctgccttcca  | acatggtgga  | gaacggactg  | 34834467 |
| gaggccaggc  | tccgtcctaa | agggcctcca  | tctctattgt  | ttccccatt   | 34834517 |
| gcctacttcc  | agAGCCTCAT | GATGGCACCC  | AGCCCTGGTT  | CATCAGCAAG  | 34834567 |
| CCTCGTTCGG  | TGACAGCCAC | CCTGGGCCAG  | AGTGTCTCA   | TCTCCTGCGC  | 34834617 |
| CATAGCTGGA  | GACCCCTTtC | CCACCGTGCA  | CTGGCTCCGG  | GATGGCAGAG  | 34834667 |
| CCcTCTCCAA  | GGACAGTGGC | CACTTTGAGC  | TGCTCCAGAA  | TGAGGACGTG  | 34834717 |
| TTCACCCTGG  | TTCTAAAGAA | CGTGCAGCCC  | TGGCATGCCG  | GCCAGTATGA  | 34834767 |
| GATTCTGCTC  | AAgtgagtct | gcctgtcctg  | ccagccgctc  | tcaccccacc  | 34834817 |
| cccaccccac  | cccaccccc  | agactcctga  | ctcttatgct  | ggaactggga  | 34834867 |
| agctagagga  | agcaggagct | gatgcagggt  | tattgagttc  | atatctctgt  | 34834917 |
| agctccgagg  | ctggcagctt | taattggcga  | tggccttctc  | gcttgcaaag  | 34834967 |
| cccaggggtg  | gcaccagggc | atcatgtggc  | aagaggcaga  | gaacacgcat  | 34835017 |
| gtggctcttc  | tctgtctcat | ctttacagct  | gctagtatcc  | aatcacaggg  | 34835067 |
| attccaaccg  | atggagtgtt | agatthtccc  | ccaaggacc   | acctctaaat  | 34835117 |
| attatggttg  | ggttaagttt | ccgccttctc  | gatacctcac  | aatagacatg  | 34835167 |
| aaattgcaat  | acatggacct | tagggacaca  | tacttccagg  | ccacagcagc  | 34835217 |
| taagagttag  | aagcatctta | gcgatagttc  | gaaccgctgg  | tgccttttac  | 34835267 |
| tgcccatttt  | tggaaatcac | acactctaag  | atgtggttct  | tggttagaag  | 34835317 |
| tgaagcctcc  | cagtacgacc | tttattcaag  | aagagaagaa  | ccagaggttc  | 34835367 |
| atcctttggt  | aaaaagcata | ccaatgaatt  | tcatatatta  | ttattaagct  | 34835417 |
| gatatggggg  | atgggatggg | gttggagcca  | agttctgttt  | ccagcaccca  | 34835467 |
| cactggacag  | caactccagt | tccagggggac | ctgacatcct  | ggactctgta  | 34835517 |
| ggcacctgca  | cttacatcat | atcctcacac  | acagacagag  | cacatacata  | 34835567 |
| taattaaagg  | taggtgtgga | tgtagcatgc  | ttgcctgggtg | gtacaaggcc  | 34835617 |
| ctgagcctga  | ttctccagaa | ctgaaaaaaaa | aatccaaaat  | aagttttaag  | 34835667 |
| atattttctt  | aattgctacc | gggcagagca  | tgggtgcacac | ttttaatcct  | 34835717 |
| agcacttggc  | agggtgattt | ctatgtgttc  | gaggcgtgga  | taaaagtctg  | 34835767 |
| aaaagagtgc  | ggggttattt | tgtctggggt  | cagggtagag  | tgcatacacg  | 34835817 |
| aggggagctc  | aggatggcag | gagctctagg  | catccgcagt  | caggaagcag  | 34835867 |
| aggaaggaga  | tcagtcctca | gctgcttttc  | ccctttgtat  | tcagcccagg  | 34835917 |
| ccatggtgct  | gcccaggcct | tcccagtcaa  | ttgacctcac  | acagacaatc  | 34835967 |
| ccttacaggt  | gggaccagag | gtgtgtctct  | taagtgagtc  | tagacactgc  | 34836017 |
| caaattgatg  | ttagccacca | cacgtaatta  | aaaaatgaga  | ataagacaac  | 34836067 |
| cacggggaga  | ttaattttcc | ctattaaaac  | actccatctc  | ctaaaatcct  | 34836117 |
| aagtgaagcc  | tagactgatg | gacagaatac  | ctactctgtg  | ttagcctaag  | 34836167 |
| actggcacia  | gcacctgtgc | gtgagagact  | gtgacatatac | ctgagagtgg  | 34836217 |
| ttagacatgg  | ccttaacggg | tgcctgagga  | gctggctact  | tccttctga   | 34836267 |
| acttgatcaa  | ctccctacac | tgagcccacc  | actcaggatc  | agctgtataa  | 34836317 |
| gctacactct  | atgctgtgat | ggaatactgt  | acctacaaca  | attctgagtg  | 34836367 |
| tgtgcttttt  | actcacagca | actagctgtt  | gcagcttaac  | aaaccacccc  | 34836417 |
| caagtgcctta | agtgcattta | aaaaaaatac  | ctctttaaaa  | aagaaagctg  | 34836467 |
| ggctggagag  | atgtctccgt | ggttaagagc  | actgactgac  | tgatctccca  | 34836517 |
| aagggcctga  | gttcaaatcc | cctgcaacca  | catggtggct  | cacaaccatc  | 34836567 |



|            |            |             |             |             |          |
|------------|------------|-------------|-------------|-------------|----------|
| tgtaatggga | tccgatgcct | tcttctggtg  | tgtgtctgaa  | gacagtgaca  | 34836617 |
| gtgtactcac | ctacataaaa | taaataaaat  | ctgaaaaaga  | aaaagaaaga  | 34836667 |
| gaaagagaaa | aagaaaagga | agaaatctat  | tatctcttag  | agatcttttg  | 34836717 |
| gtctgttcag | aaattatgcc | tctacgggca  | gagccccact  | gatctgaatt  | 34836767 |
| agacagagga | ccttcttaca | agtactcgtc  | atgccattcc  | catcagtcac  | 34836817 |
| gtgcttagac | gatatcacct | gactctgcct  | taagcttaag  | gccttaatca  | 34836867 |
| ggagggacaa | atctgcctcc | atgatgaggg  | gtctacaccc  | ttgctcacta  | 34836917 |
| ggccagtact | agggcagaga | gtgacttaat  | gtgacaatac  | tttctgatga  | 34836967 |
| aggaacaaca | ctctgagatt | acacttgat   | taatcaacca  | gatagcctat  | 34837017 |
| aagagatggt | ttttttgggt | gtgtgtgagg  | ttctgtttgt  | ctggtttggt  | 34837067 |
| ttcatgagat | acactctcat | attgcccaga  | tggcctcaaa  | ctcagtatat  | 34837117 |
| ataacattga | actcctgaat | ctcctgtctc  | catctcctgg  | atTTTTTTTT  | 34837167 |
| TTTTTTTgtg | atTTTgaagc | aaaaagaaag  | cctatgtgtt  | ggccaatgaa  | 34837217 |
| aggggacttg | gctgttaaat | gagccaagaa  | agaaggggga  | agggagaaca  | 34837267 |
| aagcaaagat | ctataggaag | tctgccaggc  | catagagggg  | gttactactgg | 34837317 |
| aagggcaaaa | ggcagactgt | ctgggaccag  | ctggggacag  | tcataaaaatg | 34837367 |
| tagagtatcc | cagctggaag | gggatgcaga  | aattatctag  | ccttcccac   | 34837417 |
| tagtaatgag | ggactccaag | gtctcgggtc  | attgacttgc  | tcatggccgc  | 34837467 |
| aagctgagcc | taagtctcag | cccttgtctt  | ttgacctcca  | tcagatggtc  | 34837517 |
| ttccattctt | gcagcctatc | atTTTgtgtg  | tctttccatg  | cacggggaat  | 34837567 |
| gagggacctg | ggaattcatg | ctggTccctt  | catgaatccc  | ttgcccTTTT  | 34837617 |
| cctcccaaag | tctagattcc | tcattcctcc  | cggaggccat  | tgccttggcc  | 34837667 |
| ttggctctgt | ccccagcaga | aaatggagca  | agtcagtgga  | aagttctcct  | 34837717 |
| gaggagtgca | tgccaggcct | gccagggacc  | ttgttcctc   | tcactatTTT  | 34837767 |
| tgtcctgaca | gaagtcagac | ctagcccatg  | gaagagggtc  | tttcaagaag  | 34837817 |
| gaaggctggt | agccaggcag | tagggacgca  | cgcctttaat  | cccagcactt  | 34837867 |
| ggaaggcaga | ggcaggtgga | tttttgagat  | caaggacagc  | ctggTctaca  | 34837917 |
| gagtgagttc | caggacagcc | aaggctacac  | agagaaacc   | tgtcaaaaaa  | 34837967 |
| aaaaaaaaaa | aaaagagggg | aaagaggaag  | aagaggagga  | ggaggaaggc  | 34838017 |
| tgggaagtgg | ggctgtgaga | caaccaaggg  | ggtgcagtct  | gttcctgtgg  | 34838067 |
| agtagtggac | atggatgagt | tttgacctcc  | ccttccttc   | gccagccctg  | 34838117 |
| actaagagga | gagctagcaa | cacatcagct  | ccaagtcca   | gctgagatgt  | 34838167 |
| tagaaagcac | agacatTTTc | cagaaaatta  | gttcttcacc  | tttgcatata  | 34838217 |
| aaattgtccc | gtgtgatggt | gatttgggga  | ggggcatgtt  | gcgaggcccc  | 34838267 |
| tcatcagagt | gtgagcctct | aatacggggc  | tcaagaaagg  | ggagcgcgtt  | 34838317 |
| tgtggcaggt | tcgcagcata | cgggatgact  | gctgtgtcct  | gtgtgacaac  | 34838367 |
| atcagggcaa | ggcctcagtc | tcagcctggt  | tgtgaaggag  | tgtgggtaat  | 34838417 |
| attaaagatg | tctccaagat | actgttcctg  | ctggTgaagt  | cactggtaga  | 34838467 |
| tggccccagg | caagagtctg | tctgaacttt  | ataggctcca  | gaagaacca   | 34838517 |
| tggcttgctc | taaaggccca | gtagaggttt  | tcatttttagg | ctttcagtat  | 34838567 |
| tgtcccctca | gtggcccagc | catggTgtct  | ctgtgttctt  | ccccctcatc  | 34838617 |
| tgtctggaga | cctcagggTg | ggtggagcta  | gagaccttgg  | gtggggctta  | 34838667 |
| tctttgtccg | tggTccccac | cacagatcat  | cgcaatgaca  | agagcccttc  | 34838717 |
| cttgcttctc | tccatggggT | tatatacata  | catgtagctc  | cagctcagaa  | 34838767 |
| gacaatccat | ctctgatgca | cagcctccta  | gagtgtggcg  | aggtaaagtg  | 34838817 |
| gggcatctg  | gtcaggatct | gctcctgatt  | tctatgcctg  | ggttttgtcc  | 34838867 |
| tccttatgac | aagaggaaac | tcagagataa  | tgtgagggaa  | aaggagctac  | 34838917 |
| caaggaaaca | cccattgggc | atcttTgctct | gttccatgcc  | agcatcgctg  | 34838967 |

|             |            |            |             |            |          |
|-------------|------------|------------|-------------|------------|----------|
| cgaggtagag  | aaaaagtagc | ttagcattgc | ccaggaggct  | gacagaagca | 34839017 |
| ggaaaccagg  | tacttgctca | cggcctggca | ctaagtagct  | gccgtagata | 34839067 |
| ggtgtagcct  | gcactcttca | ggtgccttca | cttgggtcact | tctaagaacc | 34839117 |
| caggcctgga  | ggaagggaca | aactacaggg | gctgacctga  | aggagagagg | 34839167 |
| aatgaggtcc  | caggaaggga | tcaatgtggc | cacagcctgg  | gatagcacia | 34839217 |
| agacaagggg  | tggagtgaag | gaggagagag | agggctggaa  | ggaagcaaat | 34839267 |
| ccacccatcc  | tggttcacia | gggtccctgc | ccttcacagg  | ggtgaggaa  | 34839317 |
| aaggcctcag  | accccagaaa | gcagaacctc | tctgtagctg  | ctagtgtctt | 34839367 |
| tccatgagga  | agtgccagac | aaagtgaggt | ggattacggc  | tgtggcagca | 34839417 |
| ggacatgtaa  | gtgcatctcc | ccagactcga | gatgtaggta  | cctaccaggt | 34839467 |
| ggtcccatac  | acttacgtgt | gggcgtccac | tcttgtgggt  | aaggcacaca | 34839517 |
| tgtatgcaga  | cacacgaaga | aacacaccaa | gattccagag  | caaactgggt | 34839567 |
| ctgataagca  | atgtaggacc | tgtgcacagg | ccacaagtct  | tatatgtagg | 34839617 |
| tagatccagg  | tcccggacc  | tgttctctgt | ggttacctct  | gagttcaggc | 34839667 |
| acatcgttca  | accttcatgc | actccgtttg | ccttttataa  | acagtgtctg | 34839717 |
| ctctaagctg  | ttagaacctt | agacaaaatg | agatgggttt  | tgggaggagg | 34839767 |
| aggaggagga  | ggaggaggag | gtccagtgtc | ggcagctgat  | atgcctatca | 34839817 |
| tgggtctgga  | agggctgctc | agaccagca  | gtgctgctaa  | gacacctagg | 34839867 |
| gaaactatgg  | gacctgagaa | tcccagcact | gccttgcata  | atccccacag | 34839917 |
| cctccttccc  | tacactctcc | agaccaagct | ggcatgctgt  | ggagaacaag | 34839967 |
| ataaacaaaag | catgtggcag | tcatgagggc | cggagggtct  | cggataaaca | 34840017 |
| ccggtagatc  | ttcccctttt | cattcccaga | cttgcccctt  | tatgagacat | 34840067 |
| cactctgaag  | caccagcagg | gggcagcctc | tcaggccaga  | gggctcaact | 34840117 |
| gctttgaatc  | cactggccag | ccattcatcc | ccctgcctga  | gaagaggggc | 34840167 |
| ctcagccggg  | tcatgcaccc | ctggaggctg | aacagctctg  | tgattgtaag | 34840217 |
| gaatccagag  | ccggccccac | ctgaaggagg | aaaagaaagg  | ggccaccat  | 34840267 |
| gttgggaggc  | acgcatgtta | ggttcttaac | acagaatgtt  | ctgattaatg | 34840317 |
| aagggggctg  | tgactgtttt | caaggaaaat | tcagccgttg  | gggaagtggc | 34840367 |
| tgtcattact  | ttgagggagt | ctagaatcag | gtcaggtcac  | tgggcatctg | 34840417 |
| agcagagcct  | gtctgcatgg | atgagaggct | tcacgcgaac  | ccctcagcag | 34840467 |
| cctttattct  | tggactgagg | ggctgatcca | tagtgttcaa  | ggattcccat | 34840517 |
| ctatagatgc  | taatctttgc | tgccctccca | aatatctccc  | ctcccctttc | 34840567 |
| tttttaatct  | ggaactgtaa | caatcaaagc | tgaccacagg  | gtgagagccc | 34840617 |
| tagcctagat  | ctaagtctgg | gatggaagcc | acagctaagc  | cctaggcctc | 34840667 |
| ctccttcttc  | tatggcccat | cagcccacga | ccaagtctac  | acttgccttg | 34840717 |
| cacccttctg  | gccccgagct | gaataggacc | tttgcccagg  | gaaccgcata | 34840767 |
| gctcttattg  | tattgtcctt | gacttcatca | gGAACCGGGT  | TGGCGAGTGT | 34840817 |
| AGTTGCCAAG  | TGTCACTGAT | GCTTCACAAC | AGCCCTTCCA  | GAGCCCCACC | 34840867 |
| ACGgtgagtg  | ccccaggag  | tagcctggcc | aggtcccca   | acaacgcacc | 34840917 |
| cgcacctctg  | cctggccctg | aagcctgggg | ttgtttgtgt  | cctcctgctg | 34840967 |
| aggctaccag  | agccaaagag | aaagattgga | aggggatgaa  | ggaggagggc | 34841017 |
| cagaagaagg  | ggaaggaggg | ggtgatgtgt | gtttcttttt  | cttttctctc | 34841067 |
| tgtatttttt  | ttttttttgc | acacaccctt | ataaggctac  | tgaaatcatt | 34841117 |
| accgatataa  | taaaccaact | aggccagtga | gtgcctctca  | ccaatgttcc | 34841167 |
| cttctataaa  | cacagcctgg | ccggccccca | cgcccccttc  | cccctcctct | 34841217 |
| ctaccctccg  | ccctcagggg | tttgctctcc | cctgacgttt  | cagccttacc | 34841267 |
| cagccccttt  | tcctcttctg | actttctctt | tttccttcac  | tggttattgc | 34841317 |
| agGGGGCGGG  | AGCCTGCCAG | CTGCGAGGGC | CTCTGTGGTG  | GTGGAGGAGT | 34841367 |

E14

|            |            |            |             |            |          |
|------------|------------|------------|-------------|------------|----------|
| TGGTGCTCAT | GGTGATGGTG | ACCGTCATGG | GACCCTGAGG  | CCCTGCTGGC | 34841417 |
| CAGCAAGAGG | GCAAGGTTGG | CCTGAGGAGG | AAGACGGAGA  | AGACGTGAGG | 34841467 |
| GGGCTGTTGA | AGAGACGGGT | GGAGACCAGG | CTGCACACAG  | AAGAGGCCAT | 34841517 |
| CCGCCAGCAG | GAGGTGGGGC | AGCTGGATTT | TCGAGACCTC  | CTGGGAAAGA | 34841567 |
| AGGTGAGCAC | CAAGACCGTC | TCAGAAGACG | ACCTGAAGGA  | CATCCCAGCC | 34841617 |
| GAGCAGATGG | ATTTCCGCGC | CAACCTTCAG | CGGCAAGTGA  | AGCCAAAGAC | 34841667 |
| CATATCCGAG | GAAGAGAGGA | AGGTGCATAG | CCCTCAGCAG  | GTTGACTTCC | 34841717 |
| GGTCTGTCCT | CGCCAAGAAG | GGGACCCCTA | AGACCCCGT   | TCCTGAGAAG | 34841767 |
| GCACCTCCAA | AAGCTGCCAC | CCCAGACTTT | CGTCTGTGC   | TAGGTGGCAA | 34841817 |
| GAAGAAGTCA | CCCTCGGAGA | ATGGGGGCAA | CAGCGCTGAG  | GTCTTGAATG | 34841867 |
| TCAAGGCTGG | GGAAAGCCCC | ACACCTGCAG | GCGATGcGCA  | GGCCATCGGG | 34841917 |
| GCCCTGAAAC | CCGTAGGCAA | TGCCAAGCCT | GCTGAGACCC  | CGAAACCTAT | 34841967 |
| AGGTAATGCC | AAGCCTACCG | AGACCCTGAA | GCCTGTGGgC  | AACACCAAGC | 34842017 |
| CTGCCGAGAC | CCTGAAACCC | ATAGCCAACG | CACAGCCTTC  | AGGGTCCCTG | 34842067 |
| AAACCTGTAA | CCAACGCACA | ACCTGCTGAG | CCCAGAAGC   | CTGTGGGCAA | 34842117 |
| TGCCAAGTCT | GCTGAGACCT | CGAAACCAGC | TGGGAAAGAA  | GAAGTCAAGG | 34842167 |
| AGGTAAAGAA | TGATGTGAAC | TGTAAGAAAG | GGCAGGTCGG  | AgcCACGGGC | 34842217 |
| AATGAAAAGC | GACCCGAGAG | CCAAGGCTCG | GCCCCAGTTT  | TCAAGGAAAA | 34842267 |
| GCTACAAGAT | GTCCATGTGG | CAGAGGGGGA | GAAGCTGCTA  | CTCCAATGCC | 34842317 |
| AGGTGATCTC | TGATCCCCC  | GCCACTGTCA | CCTGGTCGCT  | GAATGGGAAG | 34842367 |
| ACACTCAAGA | CCACAAAATT | CATCGTCCTC | GCCCAAGAAg  | gtaaatgaga | 34842417 |
| gcgagggtag | ggaagatggg | aagcccatcc | atgggtcact  | gtcaaagcat | 34842467 |
| gaacctgtag | tctgcttgat | ggtcacttgt | agccatggcc  | tgagctggaa | 34842517 |
| tagccacccc | tattccccct | cctttacaga | ggggccctgg  | gtatacacat | 34842567 |
| gagcctactg | tggatgtgag | ctgcgcttct | gagacttgtg  | gtacatgctg | 34842617 |
| tgccttggtg | tctgtctggc | agagctcttt | cctggtaccc  | taccaggtc  | 34842667 |
| tcctctgagc | ttacctagga | ctgagtgttc | aacaccccc   | cccatagaga | 34842717 |
| gagctatgct | ttgcagactg | ggagaagggg | gacatggagc  | tgaagtgagc | 34842767 |
| tggggaccct | gggccatta  | ttccttgata | agtgtaggaa  | acactgcgcg | 34842817 |
| acagctggta | ggagctatag | gctggcatcg | gcaacagctc  | attcttgaga | 34842867 |
| acactgtggg | tccaaacggc | cccgtgggca | agccaaacc   | ttacacagcc | 34842917 |
| ccgatgggcc | cgctcacgcg | ggacagagct | gctcgcttcc  | taatttgat  | 34842967 |
| gagacttttg | tttgctggtg | tttcacattc | ttggttgggg  | ggtggtgcaa | 34843017 |
| gtcctgccac | ccgtggcctt | tggggtacag | ttctcaagcc  | tgccagttta | 34843067 |
| caccagagaa | gacaggggag | tgagaggagg | ttatctccag  | tcctttgtta | 34843117 |
| tggttcactc | tccttttaca | tttatttagt | gtgtgtgtgt  | gtgtgtgtgt | 34843167 |
| gtgtgtgtgt | gtgagagaga | gagagagaga | gagagagaga  | gagagagaga | 34843217 |
| gagtgattat | gagtatacgc | acacgctgcc | acgtgtgtgt  | ggtcatgttt | 34843267 |
| ggaggtgaga | ggacagctca | taggaactgg | ttctttcctg  | ccactgtgtg | 34843317 |
| tgacccttag | gatcaaattc | aggtgggggt | aggggtggga  | gggaagcact | 34843367 |
| gtcacctgct | gccgagtcac | caaaccggcc | ctccgtgagt  | cttatcagaa | 34843417 |
| actcctaggc | cagagaagtt | cccacagtcc | actgaggtgg  | ctagtggaga | 34843467 |
| gacgcggtcc | tgcttgagct | agagctgacc | ctagagggtc  | atgaagaagg | 34843517 |
| tcccaggatg | tgacatgtgc | ccttgagata | ctgaggggaag | tgtctgcaga | 34843567 |
| ggctgcgtgg | acaggtctta | gcaaatgcca | gtgcactgag  | acacgccagc | 34843617 |
| ccatccttcc | ccccctctcc | ccactctccc | ctggctactc  | ccctcgccac | 34843667 |
| acactctcct | ctcatcccac | agctgcctac | ctccacaacc  | cagaaaggag | 34843717 |
| gcattttag  | acagcagcga | ccttgtccct | tgctccacaa  | ttcagccaga | 34843767 |

E15  
(130  
kDa  
E1)

|             |            |            |             |             |          |
|-------------|------------|------------|-------------|-------------|----------|
| caatctagag  | cagccgaaac | gtgtggagtc | taaatgttga  | atgaccgaaa  | 34843817 |
| ggcaaactgg  | acattttttt | ttcagcagag | agagattctg  | taatcttctg  | 34843867 |
| ctaatgcggt  | gacagtaaca | ttttcacact | gatatcctca  | ggttggcagg  | 34843917 |
| gtcttccaga  | aggcatctgt | ccccctgtgt | ctgctagttc  | tgcccccgctg | 34843967 |
| gtatccagga  | ggtcttaggg | ccacggtggt | gggtaagaa   | gtccaggaca  | 34844017 |
| gtgggtgcta  | acatccttcc | tgtcccaccc | aagaaccttc  | cactcaaact  | 34844067 |
| ggaaagcttg  | actgggtgtg | tttcccaggt | caccacgtcc  | agtgacctct  | 34844117 |
| ctgggacagga | tggaggacag | ccaccaacct | gggacatgta  | agtgggtggaa | 34844167 |
| tcctgcatga  | tactatctat | gagtacacca | acctcaggaa  | aactgggggtt | 34844217 |
| cagcggtgat  | gaaggtggca | gttcccaaag | ccagagccac  | caatagccac  | 34844267 |
| ttacagagtc  | tgctcgaatg | agctgtataa | gacaaacctc  | agccctggtc  | 34844317 |
| acagaagtgc  | tcctgagcgc | ccagtcgctg | gctgctctaa  | ggcctgggtt  | 34844367 |
| gcttggtgga  | atcttcaccc | agagcacaga | gatgcaaaca  | acatcatcac  | 34844417 |
| ctcccacagg  | ggaggaccta | agtcctcagt | gacaagagag  | actgtgagag  | 34844467 |
| gggaggtagg  | gatcacagag | agagcttcaa | agcaaactgc  | caacaatagt  | 34844517 |
| ctccatattt  | caaaggacta | atagcttgct | ccccttagcg  | gagcagctta  | 34844567 |
| tctggatgcc  | atcctagaca | gttacatatt | ctaatccctt  | aattctcaca  | 34844617 |
| ctaccaagta  | ttcttataac | agagaagtta | agtaaactgc  | ccaaggttgc  | 34844667 |
| atagccctta  | agtaacagag | aaaggaagag | accaacctcc  | tccctgcaat  | 34844717 |
| ggagggaaaca | gacccgtgaa | gtgagcctat | cttgccacaa  | taaagcgcag  | 34844767 |
| agtgtttggt  | ctccaaatac | cagcactgcc | cctgagcctg  | cactcaccaa  | 34844817 |
| atctttatga  | gggttttggt | tccccaacca | cccaccag    | gggaagtgca  | 34844867 |
| tctgaggact  | tatcagctct | ccctggagag | ctcctggaag  | gcagccaggt  | 34844917 |
| ggtggccaga  | agtggagtga | atctgctcct | agtgggtctg  | gcagcaagga  | 34844967 |
| catgggctag  | ctgtgataca | gctattggag | ccgatgccac  | agagaggtct  | 34845017 |
| gagaggatga  | gatgttccat | gctggggact | gggtggctgg  | taggaaagcc  | 34845067 |
| cagaaagcag  | gccagacttg | ggcagcaggg | aagctagcag  | taggtaggcc  | 34845117 |
| ctgtacaggg  | ctggggcact | aaaggctggc | tgcttgcgca  | tgggcctatc  | 34845167 |
| taggctatgg  | cagggggtga | cttggcctg  | atctcagccc  | acatcctgtc  | 34845217 |
| agagaacatg  | tctaaaagca | acagctagcc | atgcagggga  | gattttggag  | 34845267 |
| tgaggaatgc  | aacacgagaa | gctgggggtt | taggggcttg  | gactgactcc  | 34845317 |
| gggacaaaga  | caaggatgga | gactgctcaa | gagatcaggg  | accatgggtg  | 34845367 |
| tgaggcccag  | gctgccaagg | tgagcgtggc | cacaaaggaa  | agaaccagct  | 34845417 |
| gtaagaagta  | cagacatctg | ccataaaacc | cgtagcctgg  | cttgaagggc  | 34845467 |
| agggtgatgg  | ctggggctgg | gaagagaaca | gggatggaga  | agacaggggg  | 34845517 |
| atattatcac  | tggaactaag | gaagtctgat | ttgagatgat  | gagcaggggt  | 34845567 |
| gaagggcagt  | accatcttc  | ctgtctccca | gcacctccct  | ccccctccct  | 34845617 |
| ctgcccgcac  | tgaccccaaa | cccatctctc | tcccctctat  | caagattcac  | 34845667 |
| ttcctccagg  | atcccttctt | agagccctgt | cacttttagtt | gagacaccca  | 34845717 |
| atggatccct  | tgatctcaga | gctccccttg | ctaggaactt  | ctctgccgag  | 34845767 |
| cccacagcc   | tgcaggacag | gattacaccc | gccccactta  | gtgctgagga  | 34845817 |
| aatcccaaaa  | agaggtctga | cagccattgg | tggcgtttga  | ccactgggca  | 34845867 |
| attcttaaag  | tcaagtggaa | gtggctttcc | tcctctggca  | gccagagctg  | 34845917 |
| tgggatgtct  | gtgttcagga | gaccatcagc | tgggcctgtc  | ctccagggac  | 34845967 |
| aggtacctgg  | tcctctctgt | ctagatctat | cttggtctggg | gggcctggag  | 34846017 |
| gggagcaatg  | accctggagt | ccaggcaggg | ctgaggtagc  | actgaaaggg  | 34846067 |
| ccttttatct  | ctgtgtgttg | cttccctgct | ccaggccggg  | cttcccctag  | 34846117 |
| caaaacattt  | cttccaatct | agtaaagaag | ctttgttttc  | gttgctgtat  | 34846167 |

|             |             |             |             |             |          |
|-------------|-------------|-------------|-------------|-------------|----------|
| cgagagatga  | ttcatttttt  | tttattgcct  | tcaggggtgga | atctagttaa  | 34846217 |
| ggctttttca  | atcctgtata  | agctcattcc  | acaaattata  | tagcaccag   | 34846267 |
| tgtatatgcy  | atccctttgc  | ttgtatgtaa  | ttcgcctctt  | atctctctct  | 34846317 |
| tttttcaata  | atgcagacat  | atattattga  | tcatgtgttt  | gtgatcttgt  | 34846367 |
| cttgaataga  | tccaggtccc  | ccgctgtgga  | aataacctcc  | actacatttt  | 34846417 |
| attgcagttg  | catttcagac  | atggctatcg  | ccctcggaga  | tagcacagta  | 34846467 |
| gacaggagtg  | tgattcagca  | atggccttga  | aatggccttc  | gctgctgcca  | 34846517 |
| gtgtgctcag  | atgcctgggg  | aaccaggag   | aggcgtagct  | agagctaggg  | 34846567 |
| tcttagaggt  | gacacagagg  | ccactgtgcc  | caaggaagg   | acccagggtg  | 34846617 |
| agtagcagtg  | ttggcctgtg  | cctgccagga  | gggcaggtca  | gggaggctgg  | 34846667 |
| cagaataacc  | aagagcctgg  | caaccctca   | ccccaatcca  | cttgcccttt  | 34846717 |
| ctttttcctc  | tccccacca   | cttgggaaag  | ggaagctgga  | gggtcttcaa  | 34846767 |
| tcacagaaga  | gtgagtcctc  | ggtcaggagg  | ggctcctggc  | agagctgggg  | 34846817 |
| aaccactcag  | tggattcctg  | cttcccatcc  | ccccacctc   | actccctcaa  | 34846867 |
| ctcctcagct  | gacaggctga  | ggattctata  | ataaaaaaaaa | aaattgctgg  | 34846917 |
| gaaacagttt  | tcttctggag  | gtcaagaatg  | agccgtccca  | caggaaatac  | 34846967 |
| cagagtcttc  | atctggggta  | gccagcctcc  | agcctgccc   | gtcttctccc  | 34847017 |
| aaccacacaca | tgcattgtggc | catgggtcaag | ctctgctggg  | gccttgagga  | 34847067 |
| gctgggagag  | aggcggggtc  | tctttcagat  | cctccactgc  | ccttccagcc  | 34847117 |
| atcctgctgt  | cattcactgg  | gcctgtcatt  | taagtctctg  | gtcaaaggca  | 34847167 |
| gctggggaac  | caaaacaaaa  | aacaaaaaac  | gagggatgag  | acaggctatc  | 34847217 |
| acttgggagt  | gggggagtg   | aatttgtcct  | cccagaccag  | ggaaaccag   | 34847267 |
| agggtgagtg  | gtttcctcta  | agcctgtcct  | tcaggccagg  | tgtcacccta  | 34847317 |
| gcatcctcct  | gtccagccag  | gtgactggaa  | tggctgctct  | cactccctg   | 34847367 |
| tctctgagcc  | tcccagttct  | cactctcacg  | tcagactttt  | tccatctcca  | 34847417 |
| gccaagatcc  | tttctgttgc  | agttgagaag  | ataacgggtg  | cccactgtcc  | 34847467 |
| tcaccatgga  | aagatagggt  | caggcctgtt  | caagagctga  | gtaggagga   | 34847517 |
| ggagacacag  | atcagctatc  | ctattccaag  | aaacagtgt   | gactttccaa  | 34847567 |
| ctccctagtg  | aggctttaag  | ggccccact   | gatgccattc  | ttgctctctg  | 34847617 |
| agtctcctgg  | catcagcttt  | gtgtaaccag  | attgtcttag  | ttggggtttc  | 34847667 |
| tgttgctgca  | atgaacacca  | tgacccaaaa  | gcaaattggc  | aagggaagg   | 34847717 |
| ttattttggc  | ttacacttct  | acactgttgt  | tcatcagcaa  | aggaagttag  | 34847767 |
| gacaggaact  | caagcagggc  | aggaatctgt  | agacaggagc  | tgatgcggag  | 34847817 |
| gccaggaagg  | gatgctgctt  | actggcctgc  | tccccatgac  | ttgctcagcc  | 34847867 |
| tgctttctta  | tagatcccag  | aaccaccagc  | ccagggatgt  | gtctctgggc  | 34847917 |
| tggaccacag  | tggactgggc  | cctccccct   | ctgatcacta  | attaagaaaa  | 34847967 |
| tgctttacag  | atgaatactt  | tggaggcact  | ttctcaattg  | aggcttctcc  | 34848017 |
| ccttctgatg  | actgtagctt  | gtgtcaagtt  | gagataaaac  | cagtatacat  | 34848067 |
| catttgagaa  | aaaaaaaaagt | tcccctgaga  | atgggtgccc  | tttgtcttgt  | 34848117 |
| cccactctcc  | cataaacctg  | gaatgtatac  | agctgtcctc  | cagtgccagt  | 34848167 |
| ggtccgatgg  | ctgtataaca  | agtaacgtat  | aggcagtggg  | atggacatgt  | 34848217 |
| ccctgtcatt  | ctattgcgat  | ggtcggatac  | ctgacactgg  | gtagctaggg  | 34848267 |
| caggatgcc   | cgggagcggc  | ttacttattc  | acctcaagg   | aggacctagc  | 34848317 |
| agatggctgc  | actcctggct  | ggtcccgtg   | gctccattct  | tagatgactt  | 34848367 |
| tccccacaa   | gtcagaaagt  | tctcctaaaa  | gaggactgac  | cggctctgggg | 34848417 |
| atgagggaga  | gctgagtggg  | gaaggaccag  | atcccgaact  | ttgtctatgc  | 34848467 |
| tcagcctgcc  | ttcccactgt  | ctgcctccag  | gccccaaaag  | gtatgtctca  | 34848517 |
| ggcaaggata  | gaccataagg  | gctgtgagga  | aagaggccat  | cctcaccct   | 34848567 |

|             |            |             |             |            |          |
|-------------|------------|-------------|-------------|------------|----------|
| ccctgagggg  | ccagaagacc | cagccctgta  | gaatggctgt  | cacagaagtc | 34848617 |
| tcacctctgg  | ccttgtaccc | gtcattagcc  | cgttcttcag  | ccataaacac | 34848667 |
| ccttcctaaa  | aagccatttg | ccacagtcac  | agaccacagc  | cactaccatc | 34848717 |
| tcacaagaga  | tcatcccaaa | ggccgggtgc  | actgttaaat  | gagggttcct | 34848767 |
| acccttcct   | actcgctgt  | ttacccaaaa  | cttcctttac  | cttgggctgg | 34848817 |
| tcagatgttt  | cattgggaaa | acttgcctgc  | cacaaatggg  | aaactgtgac | 34848867 |
| ccgagttaa   | cccctgtacc | cacttgggtg  | aaggagagaa  | acacctcctg | 34848917 |
| gaagttgacc  | tctgacctcc | gcacatgcgt  | cacggccaat  | gcatggtttc | 34848967 |
| ttttgctttg  | tttcttttct | tttctttctt  | tttttttttt  | tttttttttt | 34849017 |
| ttttttttgg  | cttttcgaga | cagggtttct  | ctatgtagcc  | ctgtagccct | 34849067 |
| ggctattctg  | gaactcactt | tgtagaccag  | gctggcctcg  | aagtcagaaa | 34849117 |
| tctgcctgcc  | tctgcctccc | gagtgctggg  | attaaaggcg  | tgcgccacca | 34849167 |
| cgcccagctt  | gctttgtttc | ttaagtcagc  | aatgtctcca  | acatcactgc | 34849217 |
| caggtgactc  | cttccttgcc | actgtcccca  | gaagactgtg  | cccaggctcc | 34849267 |
| ttgtgccctg  | taaggggag  | gccatgccgg  | tctgctccct  | gtccctcttt | 34849317 |
| tccactgaca  | gaggtccctt | ctctcttttt  | ctgcagcctc  | ccaaaagagc | 34849367 |
| cctccagtg   | tggaggaggt | ccccggaccg  | ttgattagga  | atccattctt | 34849417 |
| ttgggggtcag | tcgtcaacag | agagtttgca  | ggagtcagaa  | aggagagAAC | 34849467 |
| cacattccca  | ctggatctga | gaaggggctt  | gtaaagacgc  | ccgcctactg | 34849517 |
| ggcctcagat  | gccaggccct | ttcctggtea  | ttcacagaa   | ttcctgttct | 34849567 |
| ccccctccc   | cagGCTCACG | TTTCTCTGTC  | TCCATCGAGA  | AGgCACTGCC | 34849617 |
| TGAGGACCGA  | GGTTTGTACA | AGTGTGTAGC  | CAAGAACAGC  | GCTGGCCAGG | 34849667 |
| CAGAGTGTTT  | CTGCCAAGTC | ACTGTGacg   | gtaagtcgtg  | cttatccatt | 34849717 |
| gccactacac  | atacagggcc | catctcttgc  | ccccttccac  | atctgaatga | 34849767 |
| aactccccca  | ccccccagat | tgtccccagc  | cttatttcag  | cattcatttg | 34849817 |
| gtgagaatca  | aactaccttt | aaaaaaaaaa  | atgagtcagg  | gaagaaaggc | 34849867 |
| aagtggcctc  | accttgattg | ctcgatggcc  | cacatagcct  | cttcctgaat | 34849917 |
| cctctggcca  | ggaagaagca | ctgttcacct  | tctcctcccc  | tcccagtcct | 34849967 |
| gccctccaca  | cccagaacct | tctagggcaga | gaagccaggc  | ataagggcac | 34850017 |
| cagcacgaga  | aaggacacac | ccacaggaaa  | atgactacaa  | gtatttaacc | 34850067 |
| aaccaccacg  | agcaagtgcg | cactgtgctg  | gtgccccaggc | tcgctgagga | 34850117 |
| gcctgggcgt  | gaggagggag | ctgagagttc  | aagggctctc  | tgggagaagg | 34850167 |
| tgagtcaggc  | ccaggagggg | ggagagagga  | gaacactttt  | ggcgacttct | 34850217 |
| gcaaaaagac  | agtaaggcag | cagagagaag  | ggaagagaag  | caggagaccg | 34850267 |
| agcacaccag  | ttagtctctc | aactcaggaa  | gaggcaaggc  | ccagcaggaa | 34850317 |
| gcatgcatct  | gtgtctcttt | ccccccactc  | ccccaccccc  | cactaggact | 34850367 |
| gtggaattcg  | tgcttgggaa | tagcacaagg  | cctgtgatgg  | tttagactaa | 34850417 |
| gtccttcatt  | atatttctcc | tcatcatgac  | caacagcatc  | agaaatccag | 34850467 |
| ctctgccagg  | accctctgta | tgccaggcaa  | gggcttttcc  | tctgagctgt | 34850517 |
| attcccagct  | gcaacaccca | tattttatga  | atgagaaaaa  | cggaggctgt | 34850567 |
| tcagaaaaga  | aaggcagtct | acaggaggct  | ctttggcccc  | agagtgcctg | 34850617 |
| agccagggca  | aagcctgcat | gactttcaat  | ccagtgcctt  | ttttttcttt | 34850667 |
| ttgtattttt  | atacttccct | ggaaatgtct  | aaaaggtag   | tattgggaaa | 34850717 |
| acagtttctt  | gcccttgaaa | tgctacttta  | ggagccatca  | gtaacctgtc | 34850767 |
| aaagcctgg   | gcccAaataa | ggcatctaga  | agaacagctt  | cgttgttggt | 34850817 |
| cgggctactg  | agtgtgaaca | ctttagtcct  | gaaatcctaa  | cttgttttat | 34850867 |
| agccgtctca  | caagacggag | aggctttgtc  | cccacatcct  | ggtcacagag | 34850917 |
| cagagatccg  | gggtacataa | taagtgggag  | catagacgga  | gtgttctcta | 34850967 |

|             |             |             |             |            |          |
|-------------|-------------|-------------|-------------|------------|----------|
| aaggaaagtg  | tcttttgaaa  | acacacaatt  | gcaaagtaaa  | tgaaatcgtt | 34851017 |
| gctagccagg  | agtctgacag  | ggtatgggtt  | ctctgggggt  | ctaggaatga | 34851067 |
| ctttggagga  | tgtagatctg  | ctaagtcaag  | gttcaaggct  | aacttgatgt | 34851117 |
| gtgctgtgag  | gctcctgctt  | aatcctctgt  | gtgtctcttc  | ccaccttccc | 34851167 |
| ttgttgccc   | ccttgtccaa  | gtgggaaacc  | atggaaaact  | ggctaagcct | 34851217 |
| gctaatagag  | ttatctgttt  | tgaaaccctt  | ggcctcttga  | gctcctattt | 34851267 |
| acacagagag  | ctgcaggcaa  | gagagcaatt  | tgttcctctt  | atctggatag | 34851317 |
| tgtcagcacc  | ttttccagat  | ttgttggcca  | agtgtgagtt  | cctttttctt | 34851367 |
| ttcacaatat  | attcaagaag  | tcttgttttg  | tttgagtttc  | atttagcggg | 34851417 |
| ttcgttcatt  | ctgcacccta  | agaagcttgc  | tttgctcagg  | gggtgtgccc | 34851467 |
| aaagattctg  | ctgtctctac  | tgatcgcagt  | gatgcctatc  | agttatctcc | 34851517 |
| agtccttttg  | aagtcagaat  | ttggctcctg  | gctacaaatt  | aggagctggg | 34851567 |
| tctttgaaag  | acaggggaga  | catcagctga  | ggaacaaag   | atgactcagt | 34851617 |
| tggacttggt  | ctgggtgtgt  | tgcaaaaagg  | gaaagggaca  | gccctcacc  | 34851667 |
| ctagcccagt  | ctccattgcc  | tttgctgatg  | tacctggaga  | tgtatctatg | 34851717 |
| tcatctatta  | catgagcgtc  | ttgccacact  | cagctctatt  | tccccaccaa | 34851767 |
| gagccaccgc  | caggcaaagt  | gaaggactat  | gggctcctta  | acagctcctt | 34851817 |
| tgtccttaag  | tcacctttct  | gcctccttag  | ggttgggtgtg | tttgtcaagc | 34851867 |
| tgagtaacct  | cctgtctttt  | gccctcact   | cagtgatctc  | agtagatctg | 34851917 |
| accatccttt  | taccatcaaa  | ttcagatgta  | gggaatgggg  | tggagcatct | 34851967 |
| ttctaaaaga  | cgggatccat  | ggtttcagtc  | aaattctcaa  | aaagagtcgg | 34852017 |
| tgtgtgccac  | cttgaatgct  | gagcactggg  | gaggctgagg  | caacaggacc | 34852067 |
| acaagttcaa  | gaccagcata  | ggagactgtc  | tcaacacaga  | aatgaagata | 34852117 |
| aggagaggaa  | ggaagggagg  | aagggaggaa  | aggaggaaag  | gaggaaagaa | 34852167 |
| ggaaagaagg  | aagaaagaag  | gaagaaacca  | tttgcacttc  | ggggtagcta | 34852217 |
| gctgtgggtg  | aatatttctt  | agtgagctca  | ctagtgcatt  | tgctgtagct | 34852267 |
| gcctgcctga  | cctctgggca  | gaaccaccag  | tcccacatcc  | ctccaagagg | 34852317 |
| agagtgaggt  | ccctctctac  | tgtgcagact  | tcaagattgc  | tctcgtgctg | 34852367 |
| tcactcagca  | tgtctggcca  | tgctcctgaa  | agccactgct  | cactcattca | 34852417 |
| gtctgtgccc  | aatactatta  | agatgacatc  | tatgatggat  | gtgaggatgt | 34852467 |
| cttcaggatc  | ccacaaacag  | gaatccatct  | gggctcactg  | gcgttttctc | 34852517 |
| tctctctctc  | tctctctctc  | tctctctctc  | tctctctcac  | tctctctctc | 34852567 |
| tcctccctc   | cttccctccc  | tcctccctc   | ctctccttc   | tgttttgttg | 34852617 |
| ttgttgttca  | agacaggggtt | tctctgtagc  | cctgactatt  | ctagaactcc | 34852667 |
| ctctgtagac  | cagtctagcc  | tcaaactcag  | atcctcctac  | ctctgcctcc | 34852717 |
| taatcctgcc  | tccaggatta  | aaggcatgcg  | ccaccactgc  | ttggcaatta | 34852767 |
| ttgtttgtta  | tgggcaggat  | gggcaaccta  | tggaggcagc  | atgtctgcct | 34852817 |
| attagcagcg  | gtgcttgggt  | catttgggca  | tttgtgccct  | ttcttaaag  | 34852867 |
| tggtcatatc  | accctttctt  | ccagactcag  | caaaagggtg  | cttagccaac | 34852917 |
| aaagggtaga  | acttgtcaaa  | agtaaaactt  | caccacagag  | gagagcagct | 34852967 |
| gacttttaat  | gcctgctgtg  | gggtggccaga | gacttctgta  | cttcgtcttt | 34853017 |
| tcgggtgtctg | caaaggggtg  | caggctacct  | ttcccaatga  | gcttagcaaa | 34853067 |
| gctaactgat  | agaagcact   | agcccaggct  | gaagccccac  | ccggtagatt | 34853117 |
| acagtgtaca  | ttgccctgat  | aaagctgggtg | aggcctgcca  | gacctacca  | 34853167 |
| taggctgatt  | ctggccaagg  | aattatcatg  | tcaagatgct  | ttggagagac | 34853217 |
| cttgatcctc  | cattattgcc  | agccctctgc  | tggcaagttc  | ttctactca  | 34853267 |
| agggactaag  | ttattaatc   | ctaccattct  | ctcttagctc  | aggcctctca | 34853317 |
| cccttaggtg  | ccctagccaa  | ggcattgagc  | cttagcttca  | gggaaagcag | 34853367 |

|             |            |             |             |             |          |
|-------------|------------|-------------|-------------|-------------|----------|
| ggcttcacag  | ccacaaaaga | tgatacatct  | ttgtgaaggg  | ggaacatgta  | 34853417 |
| tctatggtac  | ccagaccagc | actcattcat  | tcagcaaaca  | tttaggtgcg  | 34853467 |
| caccctgtgc  | caggcacagc | tcaatgagtt  | ggtattgctg  | agtatgagca  | 34853517 |
| gaaaatgtgc  | ttggtctcag | gacacgggtg  | tgtgtgtgtg  | tgtgtgtgtg  | 34853567 |
| tgtgtgtgtg  | tgtgtgtgct | cacacatgca  | tttaaatgat  | accctgggat  | 34853617 |
| atgaggggaag | caaggcgggc | gatggggacg  | ggcctacagc  | ttcaggaaag  | 34853667 |
| ggttgctgag  | gacttctagt | tgagtgaaca  | tttgaacaga  | gacctgtaag  | 34853717 |
| atgtgagggga | aggagatcct | gaagaaagag  | aagagggggag | aaggaaacca  | 34853767 |
| ggagagaagc  | acagtggggc | agagcttgtg  | ggaggtgtgg  | gaggaagaag  | 34853817 |
| caggctgggtg | agccaagcac | caggtacgga  | aggccaagaa  | acaaggctga  | 34853867 |
| ggagggccag  | ggaccaccac | cagcccacat  | gcagagatca  | ctgagtgcct  | 34853917 |
| tgggattccg  | tgagctccta | tgggtggatgt | gaccatggat  | aagaccagag  | 34853967 |
| agagatggga  | gcaccgcgct | gagatgtgcg  | ggcagctcag  | gggtcttcaa  | 34854017 |
| gggagagagg  | gatgaatggc | tttgagaaag  | gaggaagctg  | tccagggctg  | 34854067 |
| agctaccag   | gagccaaagg | gtcctgaaaa  | gacaagaatg  | accagtgagg  | 34854117 |
| cagatgctgc  | cagctgggtg | ggctcagcct  | ggtcactaac  | catccggaag  | 34854167 |
| aacagtgcag  | agatccttag | tgaccctgac  | aagagcagtt  | caggagagca  | 34854217 |
| gcagcaatgt  | cagcctcatt | taatgcgtag  | agaccaggcc  | gaatcacctg  | 34854267 |
| cacaggtcac  | cctgacttgc | tgggtgggaa  | tataaaccca  | agcacttatt  | 34854317 |
| cccagctgct  | gtggttagct | gacagttgct  | gagtagagtt  | gcaccagcct  | 34854367 |
| tggctctgagt | cctggccttg | ttctgagtc   | tgccgtgttc  | ctttatcctc  | 34854417 |
| tcttgctttc  | cccggttatc | ctttaacccc  | tcacatgccg  | ctgggttagga | 34854467 |
| ctgagtcaaa  | cttgctgtct | ttgtagctct  | aagacacttg  | agtagcccga  | 34854517 |
| gaccagagaa  | tagtgttgag | tttaagattg  | gcctgggcta  | tgtggcaagt  | 34854567 |
| tccagccaac  | ccaggctaca | ggatgagagc  | ctgtctccaa  | aacaaggaga  | 34854617 |
| gaaaggggtg  | tagagaaagg | gagtggggga  | aagaaggaag  | gaattaagag  | 34854667 |
| aatttaaata  | ttgatgagtg | ttatggttct  | ggcctctgtg  | aacacatgaa  | 34854717 |
| ggacagacac  | agagatgtat | gcgtggaata  | aataacccaa  | taaaatgcca  | 34854767 |
| cacattactt  | tgatTTTTT  | ttattacaca  | atagcattta  | tttgaggcct  | 34854817 |
| aggggcatgc  | cacagattat | gtgtgctttg  | cgggcttcag  | tctctccttc  | 34854867 |
| caccctgtgg  | gtcccaggga | tcgaactcag  | gtcctgtagc  | ttgatggcaa  | 34854917 |
| gcacctttac  | caatacacag | agggatcttg  | ctggctcccc  | acctgggtgtt | 34854967 |
| tgcaactcat  | ttctccttta | ctcctgtcat  | aagatgtcgt  | ctttctaact  | 34855017 |
| aggaaggctc  | tcttctcgta | ggctcatcca  | ggggctcatc  | gcgccactga  | 34855067 |
| acaccacag   | cagaaaagga | gcccccgttt  | ccccagctg   | aaattctgtg  | 34855117 |
| tgctagcacg  | ctatTTGCC  | ttaggtgaga  | aatgaggcat  | cacagtggat  | 34855167 |
| gtgggagccc  | cagccccctg | cattgctttt  | cttgaggccc  | tcgaagttca  | 34855217 |
| gacctcttcc  | cagaagctct | ccagagcctt  | cttctccctt  | gtctagggtc  | 34855267 |
| agagtccag   | gaccaaacct | ctttcggaga  | aacaaaaacc  | aaaacaaaa   | 34855317 |
| agaaaaaaaa  | aaaaagaaaa | ggaaaaaaaa  | cctatcccgg  | ggggcctgag  | 34855367 |
| tccagagcta  | gcctagcagt | ggaaaggggt  | ggggcactgt  | ccatttaagg  | 34855417 |
| acaagtctgt  | tggctctctt | aggaccccac  | cccatcccc   | acttttccac  | 34855467 |
| acctctatct  | tctacccc   | tacattttta  | ggggcataac  | taggccagca  | 34855517 |
| aaggactcca  | gccctggggc | ccagatctag  | aaataaaatc  | cagtttcatc  | 34855567 |
| acaaaatgat  | taaaatagac | agaaactaca  | agctgctctt  | aaacttttat  | 34855617 |
| tactattatt  | tttatcccct | gggcagcgtg  | taagcacaaa  | gctggttttg  | 34855667 |
| attaagcgtg  | tggctctccc | ggctccttct  | tccctgtggt  | tctcacagtg  | 34855717 |
| gcctaccagt  | tcactctccc | tggctggggc  | ccgtgctgcg  | tgcacagccc  | 34855767 |



|             |            |             |             |             |          |
|-------------|------------|-------------|-------------|-------------|----------|
| ccacagtact  | gacagtttag | ggggtgctgc  | ccctcccca   | atcctgggcc  | 34855817 |
| tctgggtttg  | ggaaaggcct | ggtttggaag  | ggaaacttga  | gccctttctt  | 34855867 |
| cagggcctga  | tgggaagata | agttgcagtg  | tgtggagctt  | ctcaaatcca  | 34855917 |
| gctctgtgtg  | cacagcaggc | tgagtgggtca | cacctccggt  | gaacctcagc  | 34855967 |
| tggtagcagg  | gctttccaag | gtcagaggat  | gctaaagtgc  | cttaggagaa  | 34856017 |
| ggtgaggac   | catggttaac | aaaaagaatg  | agttcattta  | ctatgtaagc  | 34856067 |
| ggtgcttttg  | atctctacag | aatgccaccc  | atgccttgcc  | ttcgctgggc  | 34856117 |
| ttgggctgc   | agggagctag | aaaagagttg  | gctttctaca  | gctacggaag  | 34856167 |
| cagagacagt  | gtaaacgact | tgcccaagtt  | ctcaagggtg  | ctcgtgacaa  | 34856217 |
| agaatgagaa  | ctttcctggt | tcttggttcc  | aaccgcacc   | aaaatagcat  | 34856267 |
| ccaatgggac  | ccacaaggaa | tggcatccca  | ggctgaacct  | ccccctccc   | 34856317 |
| cattgccctc  | tttcagaagc | cagagaactg  | ggcctctccc  | cttggcttgc  | 34856367 |
| ttgtgcctcg  | gcttatctgt | cagaaaagga  | actttgatcc  | ttctctcaca  | 34856417 |
| aactcctctc  | tgctccggag | cttaccggga  | gggacagaaa  | agagtgtga   | 34856467 |
| atcaggaatt  | caatactaca | tactcacttt  | atcattcacc  | ctttcctga   | 34856517 |
| gaaggggaga  | acaatcgaag | acagacattt  | ctgagtgcac  | ctttctttaa  | 34856567 |
| agtcctgggg  | gtccttctgt | tccatgtgtg  | cacatggaac  | ctggtgccca  | 34856617 |
| gggtgaacag  | cagcttgaga | ccttatcagc  | gccacatggc  | aggaaccctg  | 34856667 |
| aactcaagct  | ctggggcacc | tttgcctcta  | tggagggagt  | agggcatagc  | 34856717 |
| cacaccatgg  | gggacagggt | atcaaggtta  | tcaagtgggt  | cttaaaagga  | 34856767 |
| tcacttctgc  | ctcccttctc | ttaccctca   | ccccatcttc  | atatactgct  | 34856817 |
| ggaaagtctc  | cattaagccc | aaacagaatc  | attcctctgt  | gtgtgtatgt  | 34856867 |
| gtgtgtgtgt  | gtgtgtgtat | ctgtgtgtgt  | gtgtatctgt  | gtgtgtgtct  | 34856917 |
| gtgtgtgtgt  | gtatctgtgt | gtgtgtgtat  | gtctctgtgt  | gtgtctctgt  | 34856967 |
| gtgtgtgtct  | gtgtgtgtgt | gtgtgtctgt  | gtgtgtgtct  | gtgtgtgtgt  | 34857017 |
| gtgtgtctgt  | gtgtgtgtgt | atctgcgtgt  | gtgtgtctgt  | gtgtgtgtct  | 34857067 |
| gtgtgtctgt  | gtgtgtgtat | ctgtgtgtgt  | gtgtctgtgt  | atctgtgtgt  | 34857117 |
| gtgtgtgtat  | ctgtgtgtgt | gtgtgtgcgt  | gtatctgtgt  | gtgtgtgtgt  | 34857167 |
| gtgtgtgtgg  | ctttgggtca | tcttcaacag  | ggaattgacc  | ttaatattcc  | 34857217 |
| tcagctgccca | cccagctgag | ccagctgtgc  | ccacagcagt  | ctctgtccat  | 34857267 |
| ggattaccca  | gctcataaag | agtacagggga | tatcctggag  | gaagcctagc  | 34857317 |
| tggtgacaag  | cttcaaaaat | aagacttaag  | tagaaggggc  | cctgtggaca  | 34857367 |
| gagcacagat  | gtcatctaga | ataagtgtaa  | ccaggggaagc | gggtaaagtg  | 34857417 |
| catgtctcca  | acccttgcca | ttgatgggtg  | cagtaccact  | cctcacaggg  | 34857467 |
| agcccagtct  | agccaagacc | agctgaggct  | gccatcctg   | gaagcaagga  | 34857517 |
| cagtctgtta  | gcccttctc  | agccaagcca  | caggaatgtg  | gccagagccc  | 34857567 |
| tggctggaaa  | atcccctcct | ccctctgaac  | ttcctcctcc  | agagcggaaa  | 34857617 |
| tgaaggatga  | ggacaggaag | gggcttaggg  | ggagggtgct  | tccatcctct  | 34857667 |
| ccccaaaga   | gtagtaaaaa | cactgcccgg  | tgattgtcat  | tcagccagca  | 34857717 |
| gcttcttatc  | taagtctga  | gtggttttcc  | cacaacgttt  | gaaagtccag  | 34857767 |
| tctcattggg  | actcaggggt | tttctgttca  | gttccacca   | gcctgcagtg  | 34857817 |
| ccattctcct  | ttgtccacaa | gagaccctcc  | cccagttgaa  | agtccagtct  | 34857867 |
| cattggtact  | caggggtttt | ctgttcagtt  | ccaccagcc   | tgcagtgccca | 34857917 |
| ttctccttta  | tccacaagag | accaccccc   | tagtattgta  | cccacccca   | 34857967 |
| gcattttctg  | agctctactg | taacatggaa  | gaaggaactt  | gctgccagca  | 34858017 |
| tcaagcagtg  | gccactgcag | gaattcatag  | gcctgccttg  | aggaggtacc  | 34858067 |
| ccaaaagccc  | ctgactgagt | cccagcctcc  | gtctcagaga  | gactatgccca | 34858117 |
| gtggctgact  | ctgaagccct | caattggcta  | ggcctgacct  | agtgcaaagg  | 34858167 |

|             |             |             |             |             |          |          |
|-------------|-------------|-------------|-------------|-------------|----------|----------|
| caagccttag  | aatcttaagg  | ccataaacac  | cgttcagtc   | atgagtccag  | 34858217 |          |
| aggtccagag  | ggcccagtct  | tctcctccct  | ctgtgtgagg  | cctttacctt  | 34858267 |          |
| tgcagagagc  | ctttggaatg  | tagaacatth  | aaaggagaga  | atcaaagccc  | 34858317 |          |
| agtgtgggca  | aaggaattg   | agagcctagg  | ccctgctaag  | tggccttagt  | 34858367 |          |
| cctggcagtg  | tctggggctg  | cagttgggag  | cagtcactag  | ctccctggcc  | 34858417 |          |
| tggccatcca  | tctgcccagc  | gactgttcta  | gccacctgat  | ttatcaggtc  | 34858467 |          |
| catccagcag  | gctctccttc  | tttggtactc  | ccctggagga  | agggcccact  | 34858517 |          |
| gcagggcgcca | cttggcgggc  | acagagggcc  | tctgggtgga  | acgtaggggt  | 34858567 |          |
| gggtgggcca  | gctaggggtca | aggtaggggt  | ctgactgagg  | gcctccccta  | 34858617 |          |
| ctcagctcct  | cagatagcca  | ctcactgatg  | tttgtgttcc  | ttttttttgt  | 34858667 |          |
| tcCAGATGCT  | CAGACCAGTG  | AGAACACCAA  | GGCCCCGGAG  | ATGAAATCCC  | 34858717 |          |
| GGAGACCCAA  | GAGCTCTCTT  | CCCCCTGTGC  | TAGGAACAGA  | GA          | gtaagtgc | 34858767 |
| tgcgcgctgg  | gctttacat   | acaaaggcag  | gagtgggtggc | agagtcccag  | 34858817 |          |
| cttctggtc   | accagctctg  | tctgaactc   | cttggggaca  | agcttctgcc  | 34858867 |          |
| catctccctg  | agtgcctat   | gtccccctga  | ctactaagcc  | aaattacctt  | 34858917 |          |
| tctcaaacc   | cctgccagtc  | tctcttcacc  | ccatccacag  | cctgcgtatg  | 34858967 |          |
| ttaccctg    | tcttcatctt  | cctgaccaca  | gccctttcca  | cctcccacgt  | 34859017 |          |
| cactttcgg   | tggcacttaa  | accctgtgg   | ggactgtcct  | tcttctttaa  | 34859067 |          |
| gttgattctg  | tctgtcaag   | ggagccttc   | taaattgtta  | ctctgccctt  | 34859117 |          |
| atgacatcat  | cgggaatgtc  | caaaggctct  | cagtgccac   | agactcccac  | 34859167 |          |
| aagtgagcct  | ctcatctatt  | gtgtatgcac  | aggtgctgtc  | ccctgtgcac  | 34859217 |          |
| cctgactgcc  | acctctctcc  | atgttctgct  | gtgctccctc  | acagctatgc  | 34859267 |          |
| cacacagagc  | tctcactgc   | gctctgggga  | gctccatgga  | gcagttataa  | 34859317 |          |
| aatatagcct  | acataatcaa  | actataatac  | ctatcaaata  | aaattatata  | 34859367 |          |
| atagatagac  | acctaaagct  | ctcaaaggcc  | gtaatacagc  | cctgccttct  | 34859417 |          |
| gctgtaatta  | ctagtgcgat  | tttattagcc  | gaactacttt  | ctgacattcc  | 34859467 |          |
| cagtttttat  | agggcacaga  | gttgcttgg   | catcccaga   | acactctaag  | 34859517 |          |
| ttttaaata   | aacttttttt  | aacagaaagc  | caggcgtgag  | gcacgcttgc  | 34859567 |          |
| aatcccaata  | tttgagaagc  | taaggggagg  | ccagcctcgg  | ctacatagtg  | 34859617 |          |
| agttctacgc  | taatctgaga  | ttcagagtga  | gactcaaaaa  | aagtaagatt  | 34859667 |          |
| aagaaaaacc  | aactaaacaa  | caacatcaac  | atcagaagag  | aagctctcgc  | 34859717 |          |
| ttctgctagt  | ggaggacagt  | gatgggtctc  | actgttcgga  | agagcgtctc  | 34859767 |          |
| cctttagtta  | tcagacagtg  | gtttatggct  | gctttattct  | tttctttgta  | 34859817 |          |
| aaagcagtg   | ttttgccttg  | ctggtgctga  | actcttggaa  | cacagctcat  | 34859867 |          |
| cagcctgagg  | tcagaagtcc  | tcagccttca  | tggaggggta  | gccaaagtgg  | 34859917 |          |
| atttataatt  | tctcctagat  | gtttacacaa  | agtgagacc   | actcagacag  | 34859967 |          |
| caaaggagcc  | acgactgctc  | agagcagact  | ttaataagct  | gttaagagcc  | 34860017 |          |
| caggcacagc  | cgtagggacc  | caggaggagt  | gagttagtag  | tgttactctc  | 34860067 |          |
| cagaactggt  | gcctgggctt  | tgctgtgcta  | cctatgggag  | accatgagag  | 34860117 |          |
| gggagatggt  | gtgacttgct  | cagtgatgag  | gctgctcacc  | tgacagggac  | 34860167 |          |
| agaggccag   | ccacctcccg  | tcttcaggtc  | tggaacatcc  | tttaggtctg  | 34860217 |          |
| tgcggtcca   | aggaagggtga | ggcaggggtca | gagcagaact  | gtgggagaaa  | 34860267 |          |
| aacaagtgcc  | atgaggctgg  | gagacaaagc  | agaccagctc  | tgggcacttt  | 34860317 |          |
| gccccgcaga  | gcagagtcct  | tggaaaacc   | cagccaagtt  | gtcctcatcc  | 34860367 |          |
| tactggcagc  | tatagctggg  | gattagattc  | acctggagaa  | catggaaacc  | 34860417 |          |
| accccgcca   | ggctgcccc   | agaccaatta  | aacagaaact  | caaggggtggc | 34860467 |          |
| agctggattt  | ccgtggtttt  | gtttatattt  | ctagatcatc  | ccagtgtgtg  | 34860517 |          |
| gccacgctaa  | acatcagcct  | tctagagggga | actggccttg  | cttctcttgc  | 34860567 |          |

|             |             |             |            |             |          |
|-------------|-------------|-------------|------------|-------------|----------|
| ttggatagca  | agaagaggtt  | gagagcagaa  | gaggatttgc | ttgctgcccc  | 34860617 |
| tgtgaagcgt  | ggcagagtca  | ccttactcca  | gacagtctta | atcaggggga  | 34860667 |
| gcggggctgg  | caggaagtgt  | ttgaactctc  | caggaaacac | acagcacccc  | 34860717 |
| actccaggaa  | acacacagca  | ccccactcca  | gaaaacacac | agcacccccac | 34860767 |
| tccaggaaac  | acacagcacc  | ccactccagg  | aaacacacag | caccccactc  | 34860817 |
| caggaaacac  | acagcacccc  | actccagaaa  | acacacagca | ccccacggtg  | 34860867 |
| ctggggtagt  | aactccaccc  | acctgtacgc  | aagggaaata | tcactcctct  | 34860917 |
| gtggtccaga  | gatggacatc  | tcaccccatg  | caccctcgtg | gccactttgc  | 34860967 |
| ctccctatgc  | tggctggtcc  | gctcagtcct  | caccgcccta | agcctgggtgt | 34861017 |
| cacactgcat  | tagcttatga  | cactgggttc  | ccttccacag | acattcctgc  | 34861067 |
| cttttagaaa  | cctgcacctc  | agaggcctga  | gagacgccac | caaaacttgt  | 34861117 |
| ccttggagcc  | ttttgacaag  | gcggctgccc  | ggggccagga | aggggaaggag | 34861167 |
| atgtctgagg  | cctgtgtcct  | ctgttcttta  | tcctttgagg | ataatttatt  | 34861217 |
| gttcagtaat  | tgcttaagtt  | acatgtgcat  | tattctcatc | tgagcatcct  | 34861267 |
| aaaacataca  | tgccaagtac  | aatgtgaaaa  | tcctcttctc | tctcatattc  | 34861317 |
| caattataca  | cccattcact  | ttttttctga  | acacttcata | tgcgtgtgaa  | 34861367 |
| tacacacaaa  | cacctcagcg  | ccaagggttt  | tcctccctg  | ccaaaacaga  | 34861417 |
| ctcacacacg  | aatctgtatg  | ccccccatca  | catgccaat  | ctgttagctt  | 34861467 |
| tattctcctc  | tttcccagac  | atgttggatt  | ctgtctctgg | actgtgtggt  | 34861517 |
| attgttaaag  | ctgcgaagta  | ccttatttaa  | gtaggaaatt | catccttctt  | 34861567 |
| gaagaaaggg  | caagtgattt  | ttccgtcaac  | agagtctagc | cagaccctc   | 34861617 |
| tctgtgagcc  | ctcctatccc  | caggggtgct  | ttattctttt | gagccagctg  | 34861667 |
| ttggtctgta  | ggagtggaca  | gtgttgacca  | cacttgcctg | ggaaccccca  | 34861717 |
| agccccattg  | tagcatgagg  | aagaagccag  | gcaatctacc | cccagccctc  | 34861767 |
| catgacaaaa  | ggactcgtta  | acctgccagt  | cagccaagtc | acaagccaca  | 34861817 |
| aacatgggag  | ggaacttggg  | agggattgag  | gtgaggaaaa | cctcagaacc  | 34861867 |
| caggttttga  | aagagggaga  | ggaatgtagt  | ttatgtggcc | tggggaggaa  | 34861917 |
| tgataacatt  | ggcaggggag  | gagaagcagg  | caggaacttg | ggggagaagc  | 34861967 |
| tgagcagatg  | ctgaggggaa  | tgttgggagg  | acagccacgt | caaataaagc  | 34862017 |
| cccgagctga  | gtgccatgca  | gtgtcagaag  | cttctgctgt | gtgacacgag  | 34862067 |
| ccaagcctcc  | actgtcttag  | aaacacttgc  | tactccatt  | tcatagagaa  | 34862117 |
| gcaaaactga  | gccctagcga  | tgaaccggtc  | ctgccgaaca | tctcctagct  | 34862167 |
| ggtaagggaac | agaactgtgg  | tggctctgtc  | ttctgccacg | cccctttcac  | 34862217 |
| cttgccgtag  | acttgacttt  | gctccacggt  | gtccacagaa | acacaataac  | 34862267 |
| agttctttcc  | ctagcccaa   | ggaacagcac  | aaagaggtag | ggtggctgag  | 34862317 |
| gtgtcaggac  | cactggaacc  | tgggaaggaga | caaaggaaag | gcgctgggtgt | 34862367 |
| gtgtccctgg  | atccagagac  | ctgtcagtgt  | gttggccata | tgctcccag   | 34862417 |
| tgggactttt  | aaaatagcca  | ttttgataca  | tttcaaagtt | acagagaggc  | 34862467 |
| acaagacgag  | tacacacacc  | tctgtattcc  | ctttacttaa | gagtctacat  | 34862517 |
| tatatcctat  | ggttttagca  | ttctctctgt  | atatatttat | attttttcat  | 34862567 |
| ttagatagac  | agatatcatt  | taaaatcttt  | tcattgtgta | tttcctacaa  | 34862617 |
| atataacctc  | aacataaggg  | ttaggaaagt  | tgatgttgaa | ccatattgct  | 34862667 |
| caacattgct  | agctaattgg  | tccagcctac  | cctccatttt | tatcatctga  | 34862717 |
| cccaaagtgt  | cctctctggt  | tattttctct  | tcttggtaaa | aatctaatag  | 34862767 |
| ccatcatccc  | cagaataactt | tacctactcc  | ctcagcacgg | aatggctcct  | 34862817 |
| cctcttgtct  | tggagatgag  | acaggaaga   | cgatcacagg | cccagagaaa  | 34862867 |
| aacacagcag  | tctctacctg  | agctgattta  | gtcgctgaga | gacaggaaca  | 34862917 |
| ccacagtgaa  | cctctgtgtg  | tccagaagct  | gtcttactgt | agcgacttcc  | 34862967 |

|            |            |            |            |            |          |
|------------|------------|------------|------------|------------|----------|
| agggcattgc | tcagacatag | ggcatagcaa | ggaagcctta | gggctggaga | 34863017 |
| ggaggaaaca | gaagtctcgg | ttgtcccact | aattaaacac | atagcttcct | 34863067 |
| caatgccctt | tgccctttta | gaacacactt | tttcccaaca | tccaatgggc | 34863117 |
| actttccatg | gctgggctca | aaccttgctc | agccatgaca | gcaagccaca | 34863167 |
| gttcgggtga | agctggctaa | ttctccttag | catctgtgtg | cagaggcgtc | 34863217 |
| tgcagctaca | gaagcaaagc | tggggttaca | cagtattggg | aacatcctgc | 34863267 |
| agagaaagtg | actggagcct | aaagcctcac | cttgggggtg | tccttctgga | 34863317 |
| ggggattgca | acagccagtg | tagttttggg | gagttttctg | tagaggaagg | 34863367 |
| caagcatatt | acttgggtga | aggatggagt | tctagggctt | taaagatggc | 34863417 |
| ttaagaaaat | acgttaaaaa | gatagtagga | tgcggatgaa | gcaatgcagc | 34863467 |
| aggcagcaga | ttcgggggtc | gaacaggaga | cagtgagtga | gcatctcttg | 34863517 |
| ggttttacag | cttagcatag | cagtcatttc | agttgggtcc | acttgacagt | 34863567 |
| cagcccatga | gtccctcttg | ctttcaggat | ccttgccttc | actgttctgt | 34863617 |
| gacttaagga | caactctggt | gcaaggttcc | ctcagaatct | gtgcctggtc | 34863667 |
| tagacacttg | tccccagagg | gtggtgcata | tgggcatatg | accccagtg  | 34863717 |
| gccattctga | ttacactggt | tttctttggt | ctggcctttc | ttatgtgtcc | 34863767 |
| ctatgaatct | gagagctgtg | tcaacttgaa | agtttctata | gacatcaaac | 34863817 |
| acgctgtcca | gtatccttgg | tcttctctag | gatcaaactc | ctttttctct | 34863867 |
| ttccttttta | agattcttta | cggggaagtg | ctaaatcctc | atagaatcca | 34863917 |
| cagggctgaa | aggaaatcta | gaagaagtg  | ggatttgaca | tcaagtcttg | 34863967 |
| cctaacagtg | aaaaacgtgg | ggcccacaga | aatagctaa  | gatgctcata | 34864017 |
| caaatgcccc | tgaagcagc  | caccaactct | tcttacacc  | cactacagtg | 34864067 |
| ctgggtgttc | atatgatagt | acctgacatg | cacctatgtg | tgcacatgcc | 34864117 |
| tggaacacag | tgatgacccc | ctcactaggc | agctacttcc | agcccctccc | 34864167 |
| tcaacctttt | cagtatctcc | cttgagccga | tcaacaagca | acatcggctc | 34864217 |
| ttcccagaag | cagctgatga | gagctgacca | gtagtgtctg | ccccgatggc | 34864267 |
| ctggccatgc | tagactcctc | tttcacaact | gtcatggcat | tccatgagaa | 34864317 |
| tgagaatgag | aatgagagct | tccagcaaca | agaggagctg | tgttcctctg | 34864367 |
| gaatcttctg | ataggactga | cttcgctatg | aggggagctg | agggggtaat | 34864417 |
| ttgccagag  | atgttaattc | tcagaaaaca | cccagtatgt | ctacacatgt | 34864467 |
| ctgcaagaat | gtactagaag | gagccagcag | gtgagaggac | aatcactcga | 34864517 |
| tgccttgaac | cttccttagg | gcatgggagg | gcatcaggat | ttggccctct | 34864567 |
| agcttcaggt | tcccttgcca | gcctcagggg | tggctgtcct | tcccttacc  | 34864617 |
| accctgtgtc | actcccagga | gccttgagcc | aacagcaaat | gctgatttgg | 34864667 |
| agaactttaa | agggtttgat | gcctatztat | agttaactac | ctaaaaaggc | 34864717 |
| aatgtcccc  | agagaggcag | agatgcaggg | acctgcctgt | acccaaagct | 34864767 |
| gttgttgaca | ccagctcccc | aactgtcttc | tcaaaccctc | ccactctgct | 34864817 |
| caattaagaa | aggggcaccc | atctgtcttc | agactgagca | gtctagaaac | 34864867 |
| tttcatgagg | gacagacttc | cctccaggaa | agaaggaaaa | atctctaggg | 34864917 |
| cagtagtagt | ttaggcttgg | gcaggctggg | cagaagcaaa | agagattacc | 34864967 |
| agaatcaatc | atgaggagta | gatgttttcc | agcagtgctc | cggctttcct | 34865017 |
| aggaaagttt | ctggttcttt | acccttactt | gtgattttag | tgggctgttt | 34865067 |
| cccttctagc | ctcagtctcc | catctagagc | agatttgatc | aaggaagtaa | 34865117 |
| cagagcactt | acttaacggt | gtgcaacgtg | tgatttgacg | cctctggctt | 34865167 |
| ctatctcagt | attaattcat | tagaattgcc | caggttctca | gcgatctctg | 34865217 |
| cagtctctgt | cctctaataa | ccacttatca | agcaaatgcc | cagtttgctg | 34865267 |
| ctaggcccca | gaggttaagc | ggggaccttt | gctgtcccca | gggaacttga | 34865317 |
| cgtatacgtt | ttgttagtag | gcttctgaac | tggattggga | ctgggatgga | 34865367 |

|             |             |             |             |            |          |
|-------------|-------------|-------------|-------------|------------|----------|
| cccaactag   | agaagcatg   | gctcctggag  | gtagtgtgcc  | tgagccgaga | 34865417 |
| gctgcttaca  | gaaggtgtga  | aagtcagcca  | aaggtgccag  | cgtgtccaga | 34865467 |
| gagcccatg   | caatgtgcta  | gtgcacccgc  | agatctgaaa  | gatgctgagt | 34865517 |
| gtgtagtaca  | gaggagcaac  | acctaaagac  | aagtacatag  | ccggaattcc | 34865567 |
| cttggcaact  | gtagcacaca  | ctgacatttg  | agaaccacgg  | acattgagaa | 34865617 |
| tagaggacat  | aaggaagagt  | attcaccaaa  | gaaagtgtgt  | gaaagaagac | 34865667 |
| tgacagtgaa  | aaccagagca  | gatctccagg  | gcattgtcag  | agaccaggtg | 34865717 |
| ggcttggtcc  | tcagtggttg  | tggttagcca  | ctagagaggt  | ttcagcaaaa | 34865767 |
| agaagcatca  | gatttatagt  | tgagaaaagt  | cactttggtc  | ccagtatgac | 34865817 |
| agatgtgtta  | gggcggggcc  | tggtgggacaa | gaggcgttgg  | catggtattg | 34865867 |
| agtttagaat  | gaatggggca  | gtgatagtga  | gtgctgtgca  | gggtgggggc | 34865917 |
| ggggcgggga  | gaggactgag  | catgtttgat  | tcagttgatg  | gaattggtga | 34865967 |
| gcactcgtga  | cgggctgtgg  | ggaagaagtg  | ggacaagaag  | cagtcggagg | 34866017 |
| agaagagcct  | gagtttgact  | gggggaaggg  | aggcttgggtg | tggtttgga  | 34866067 |
| tcctctggta  | gggatgtcta  | aggggttaga  | cacagaggtg  | ggctcagaag | 34866117 |
| gaaggctgag  | ctccagggaa  | aacatgggca  | ggagaggggtg | acagaaagag | 34866167 |
| tccttaagag  | cagcagtgag  | caaagcacc   | tggatgggga  | cgggggaatt | 34866217 |
| gaggggtcag  | gcctgtgcca  | ggtaggggtg  | gggtgggggc  | tgactgcca  | 34866267 |
| gggaggtgcc  | ccagccccct  | ctcagaggtg  | gcagatggag  | ggcactctgt | 34866317 |
| cccctcctt   | accctggggt  | ctgtagccat  | catgggattt  | gcaacgatgg | 34866367 |
| taggtctctt  | tgctgtttga  | ggatgttctt  | ctctgacagt  | ggccggtgta | 34866417 |
| gaaagtttgc  | agtgggtggag | acagaatgaa  | aggcaaggg   | ccgggagata | 34866467 |
| gataataaga  | aggggtgagcc | gagagaagtg  | ggaactctct  | actgatcagt | 34866517 |
| ttatctctac  | tgagtttggg  | catctggaca  | aaccagagca  | ttcctagaa  | 34866567 |
| acatgggctg  | aagagaagga  | cagtaaggac  | atgtgacatg  | ggacacaagt | 34866617 |
| gaggatgtca  | gtgggagag   | ccagcaggg   | caggcattag  | ttaccttct  | 34866667 |
| tttactata   | acaaaacagc  | agacgaaagc  | aacataaggg  | aggaagactt | 34866717 |
| cattttggct  | cccgttttaa  | gggtggcgcc  | catcatgggtg | ggaaggtgta | 34866767 |
| gtgggtgagc  | ctgtggcagt  | aaaagctgtg  | gctgctagtc  | acatcgcac  | 34866817 |
| tgaggtcag   | aagcagagag  | tgagtgaatg  | ccggtgctca  | gttccccct  | 34866867 |
| ccttgctcag  | tcagtaccct  | ctccccattg  | catagtgtcc  | ctcacattcc | 34866917 |
| ggatgactct  | tggtctctta  | aaccctctg   | gaaacacag   | cctactcgga | 34866967 |
| ggtgtctcct  | aggtgattct  | tagccccatc  | atggtgacaa  | tcaagactat | 34867017 |
| ccatcacatt  | ccagataact  | ggaggagcta  | agtttatccc  | agagagcaga | 34867067 |
| gaagtccttt  | gggatctgcg  | tgtttgggaa  | agagtgtgta  | gtgaggggga | 34867117 |
| ggggccgggtg | cagagcattc  | gctgagtgcc  | ttacttttct  | gtttcaaaaa | 34867167 |
| atataatct   | ttctttgtaa  | atttttgcaa  | aatagattta  | tttgtttggt | 34867217 |
| tgttgtgtgt  | gcacatgctg  | tgactattgt  | ggaagtcaga  | ggacgacttg | 34867267 |
| ggattgttgg  | ttttctccca  | ctcgatcagt  | cctgaggatc  | aaactcaggt | 34867317 |
| ctttagactt  | ggccgcaagc  | acctttcccc  | actgagccaa  | ctcattagcc | 34867367 |
| ttccccggac  | tacttttaaa  | taggaaacca  | aagtgtgag   | acgttaaata | 34867417 |
| aagtgtctta  | gttcctcagc  | ttagctagtg  | atggaacaat  | atttgaatcc | 34867467 |
| cagtcctgct  | ccagagcctt  | agcccatctg  | catgggggtc  | aggggggaga | 34867517 |
| aggtttcaaa  | ggcttggtt   | agaggggtgga | gtatgtggca  | gccagacaca | 34867567 |
| tgatggccag  | tggtcttagt  | tctagctgag  | ccatgtatgg  | ctttatgaac | 34867617 |
| ttgggaagct  | accagactta  | cgtgagattc  | cagccccctc  | ttcgtgagag | 34867667 |
| ggatacacgg  | tgaggtgtcc  | tgcttgcatt  | tgggcagagt  | agaaaggaca | 34867717 |
| cctgtgagaa  | gctatagctt  | cagagtcctg  | tgactcagct  | tcccctgtgt | 34867767 |

|             |             |             |            |             |          |
|-------------|-------------|-------------|------------|-------------|----------|
| gcacagaaca  | ccgttaatgg  | attcctacag  | atggccatat | aaaatatgga  | 34867817 |
| gagcatatag  | aacattgtta  | acctttaaag  | ttgtttttac | tgagcagctt  | 34867867 |
| caaatgctaa  | caaattcaga  | cagcaataac  | cacaaattta | tagaacaat   | 34867917 |
| ttaacacatg  | gtattcaatc  | ctatttaaac  | ctaacattga | aagatctact  | 34867967 |
| gatgggtgct  | tgcttcttgc  | cacatagggt  | tctcagagcc | aacaagcatg  | 34868017 |
| agtctttgta  | gcctctgggt  | tcatactgcc  | cacctctttg | tgtccccag   | 34868067 |
| ttcacacccc  | agggactgtc  | ttcctcctcc  | ccgttcaccc | ccaccctttc  | 34868117 |
| tgcaggagct  | ctctgacagc  | aagccagggc  | tgccgtaaca | agatgggtggg | 34868167 |
| cagggtagct  | gaaacacagg  | ccagacaatc  | caagatcagg | gtctctctcc  | 34868217 |
| ttgggtttac  | agatgtctgt  | cttctctctg  | atcttcctcc | tcctatgggt  | 34868267 |
| ccttctgtgt  | gagcaggtct  | gctctgtag   | gtcccttctt | cagcctttct  | 34868317 |
| ctgcctcctt  | ccttctctgc  | acccccacca  | ccaccacctt | cttcctccct  | 34868367 |
| tttttgcaag  | gtcacaagtc  | agattggcct  | agggtctgcc | ctcatgactt  | 34868417 |
| ttttttttaa  | tgcaagtcacc | tttccaaagg  | ccctatgcct | gaggcagcct  | 34868467 |
| agttctgaac  | tgctgacagc  | tatagcttcg  | acatgtttgt | ggaagaggac  | 34868517 |
| agcaggtggc  | tcctctggac  | attgccttct  | gcattgctcc | cctgggctct  | 34868567 |
| tcctcatca   | tcttttaggt  | ctccatcctt  | cgcgcctgcg | tcctggaagt  | 34868617 |
| cagcctccag  | gacaggagaa  | gccttacttt  | atcctttctt | cactgttttt  | 34868667 |
| ctttgtccat  | tcagcaccag  | aagtgttact  | gactaggggt | ttcttgggta  | 34868717 |
| cctagcctct  | ccatcttctt  | tggatatggg  | ctctggaatg | acgtgtgacc  | 34868767 |
| cactagcctc  | cagcttcccc  | cgacgcttcc  | cgtcaccagg | ggataagtc   | 34868817 |
| tggccattcc  | tccatcaccc  | aacacctagc  | ctccaccctt | gctcacagtg  | 34868867 |
| acattctctc  | cactctccag  | gtctctcccc  | acccccccc  | caagacctcc  | 34868917 |
| ccctgcccct  | catgtgacct  | agctgttatt  | gaaggtgcac | caccaggggt  | 34868967 |
| aagccccagt  | cattgggaca  | ttgggtcattc | ccactttccc | gtgtatttct  | 34869017 |
| ttccccacag  | tctttgatga  | agcttcccag  | ttctcattct | aattgcagct  | 34869067 |
| taaattctca  | ctttccagtc  | tctgccattg  | tttctctagg | actctgacct  | 34869117 |
| tggcttctag  | aaacttccat  | acggatcaat  | acggtcaccc | atcgtgtcca  | 34869167 |
| cttgaccaag  | ccaaacttca  | tcactctctca | cattctgttt | tcctttgcta  | 34869217 |
| caatctcccc  | tctgtttcta  | agagagaaat  | ctcaaaatac | ttctgtacct  | 34869267 |
| ccaccttggt  | tagttcccta  | acttctttta  | atgcctgctc | tgtccatcat  | 34869317 |
| tcactttttc  | tgtgtgggtgc | ttctgagtac  | cttccaagag | gtggcagcat  | 34869367 |
| cctaactgga  | tatccttgtc  | gccctgtgaa  | gacctgagga | tggagacca   | 34869417 |
| gtgtgacagc  | tgtgtgtgaa  | atggtccttt  | gatctctcaa | gctaaagacc  | 34869467 |
| cagctctctg  | gcacacgagg  | ctaattgctgt | ccagcagaac | tctctgtaac  | 34869517 |
| agtgaacatg  | ttctgtgcct  | gcactctgtg  | atagccacta | atcatgtttg  | 34869567 |
| ggctattaag  | tacttagaat  | gaaactagtt  | cagtagagga | agtaaatact  | 34869617 |
| tagttttctt  | tcatttaa    | ggacacacta  | gcttcatcca | acttctgtc   | 34869667 |
| ataacgggtg  | tctcctggcc  | aacctctact  | gaacaccacc | cttgagactg  | 34869717 |
| tatcatctga  | tgctaaccg   | ggctcctcct  | tgttctctag | ggccatcttc  | 34869767 |
| ttaggccttg  | ggtccaccat  | tcctcagtaa  | tgagctgatg | accatgttct  | 34869817 |
| caacacgcac  | agggtctctt  | tctgctgtgt  | ttgagcaact | gggtgttact  | 34869867 |
| ttgttttttag | aaaaaattta  | aagactta    | atatatata  | atatgtatat  | 34869917 |
| atatatcaca  | tgtctgcctc  | atgcctttga  | agccagaaaa | ggcatcagtt  | 34869967 |
| acagatagtt  | gtgaaccacc  | atgtgggtgc  | tagattctga | acctgggtac  | 34870017 |
| tctgtcagag  | tatcaagttc  | tctgaatcac  | taagccagct | ctacagcccc  | 34870067 |
| tttatcttac  | tttttagctt  | cctatttaac  | tctgattttg | aaataatttt  | 34870117 |
| aatataaatg  | gttattctat  | acctttcaga  | ttcctcacag | atattaatat  | 34870167 |

|            |               |            |            |             |          |
|------------|---------------|------------|------------|-------------|----------|
| tttgtggtct | cttttcccta    | tattccttcc | ttctgggtac | gtagggggtg  | 34870217 |
| gcctctgggt | gaaccagg      | ccttgtcttc | actgagcagc | tgctgtccct  | 34870267 |
| gacagaactt | tataccag      | cattccctct | ttctctgaat | ttctctccac  | 34870317 |
| ctctatacac | acacatg       | acacacacac | acacacacac | acatgcacac  | 34870367 |
| gcacacacac | acacataatt    | atgcttttgt | gcatcccaaa | agaaaattat  | 34870417 |
| actcataaac | cttaaacadg    | taaagacttt | agagttgagc | tttcctaaaa  | 34870467 |
| gcaaatgtgt | tccataacc     | acattaagat | gatcaaaata | gaaaaacacc  | 34870517 |
| catagagtac | tatcatctaa    | tttattgaca | atatttgaat | actcccagct  | 34870567 |
| gccctagaat | tattccttaa    | aagagagaag | cccttcttgt | ggactgcact  | 34870617 |
| acctaaatgt | ttaggatctt    | gaagttaagc | ctaagttttg | acatctgtat  | 34870667 |
| ggttttctct | tcactaccct    | agttcatagt | gtttactgag | tgacacatag  | 34870717 |
| taggcccaca | ataagatagg    | gctcacttat | ggcagccagt | gagagaggaa  | 34870767 |
| gcagacctct | tccttagacg    | tagccactaa | gccacagttg | tcggcactgt  | 34870817 |
| ggtctcaagg | tgtttctgtc    | gggggccctt | cctttcagtt | gtcttctgag  | 34870867 |
| agacgtcgg  | tgcggtggcag   | cactgtctcc | tctgtggaga | taccaggggc  | 34870917 |
| tagccaaacc | acctgtggtc    | gcagagcag  | tccacagacg | tgctggccc   | 34870967 |
| cagagctgtc | cctccattct    | gcagtagcca | agtgactcaa | tatccacca   | 34871017 |
| ctcactcact | taacaagcag    | gtattgagtg | cctactgcgt | gtcatgtaca  | 34871067 |
| ttgaatctat | aatagtgaac    | aacaacaaaa | ataccctacc | tcaaaatatt  | 34871117 |
| gcacttagga | aagggggggc    | agataataaa | acaagtgaag | atatgataag  | 34871167 |
| tgccaagggg | gataataaat    | cagggtaaga | gctgtgagta | aagattctct  | 34871217 |
| ctctctctct | ctctcgtcat    | tctgtggttc | tgggaataga | aaccaggggc  | 34871267 |
| ttatgtttct | tgggcaagca    | tttaatcacc | aagctaaatt | cctagcccaa  | 34871317 |
| gggctaggat | tcagatctcc    | tgagtgatgt | gccccgacac | acttttgaat  | 34871367 |
| gaaagtgtaa | ttccctgtg     | catcttcagt | agtgcataat | gtgtgagtcg  | 34871417 |
| tgagcaaacg | agttgtcatt    | tgatgaccac | tgcagtcagg | ataggcctcc  | 34871467 |
| ctgtgctgct | tgtcaatcct    | ccctcagcac | ctccgaagcc | acgacctgtt  | 34871517 |
| ctctgttct  | atggcctttc    | tagagcactg | cataagtggg | atgacatata  | 34871567 |
| taataaggat | gctttgaatc    | tggcttccca | tagctaagga | gaaaaaacac  | 34871617 |
| ttccaacag  | gaaaggaaag    | ggggccgtga | acttgtgaga | gaaaggggag  | 34871667 |
| ggttgagggg | aggaaaagg     | aaggaagaaa | tgatacattt | tatttttaaa  | 34871717 |
| aatgacctg  | aaagaagtaa    | aaaaccgagc | catgggaaat | aatgcagggtg | 34871767 |
| tttctgcctg | tgtgtcttat    | ttttatthag | acagatgggt | tgagttgtgc  | 34871817 |
| tatgaagcgt | ctctgtctga    | gtcatgtttt | tatttttaat | tttttgttaa  | 34871867 |
| gttttgagaa | aagtagagta    | gggaggaaag | atggcaagat | actattcatt  | 34871917 |
| agttctgagg | gtcggagatt    | gcaatagtgt | ccagcatccc | aggctccctg  | 34871967 |
| ggaactccct | gtgctgcca     | ggcagctttt | gaacttgtga | aagtgcctttt | 34872017 |
| cccctcagcc | tccaaggct     | gatcatgggc | aggggctgct | gttcccagct  | 34872067 |
| tccattcatt | cactgattcg    | ttcattgagg | gtttggtttg | gggagttttg  | 34872117 |
| ttttgttgtg | ttttgttgtt    | taagaaacaa | cgaccagtca | cagcctgtga  | 34872167 |
| cctaaaggaa | gccggagacc    | cttggatcca | taccagggct | aatttttagtt | 34872217 |
| gctgtatctg | acataatttc    | ctttctgcat | ttcctgaaag | ttaggggtgag | 34872267 |
| catgtagtta | gtgagttttt    | ggttgtcatc | tttcagtagg | actatgaggg  | 34872317 |
| gcgtttgagt | tttgagaact    | tctatcccac | tggtccgagg | gaccctact   | 34872367 |
| gaggccctca | aggactgaca    | ttcattgaat | cctaagattg | tatcagggca  | 34872417 |
| tggagatcca | cgggaagaca    | tagtagaatg | aggggtgtct | atacacgagg  | 34872467 |
| ggcctgaaca | gaactgacat    | cttaacgtca | taacgtgtca | gctttttttt  | 34872517 |
| tgtttcag   | GC GACGCAACTG | TGAAAAGAA  | ACCTGCCCC  | AAGACACCCA  | 34872567 |

|            |             |            |            |             |          |
|------------|-------------|------------|------------|-------------|----------|
| CAAAAGCAGg | taacagtcac  | agtgccaccc | gagggctag  | ggtcgtctgc  | 34872617 |
| catggggcct | tcttctctgc  | cttctgactt | ctgaccatat | atgggtagta  | 34872667 |
| ggcagcagat | ccttgccctg  | tetaagctcc | acatttctgg | ctgcctcctt  | 34872717 |
| ctcctctagg | aagcctagga  | acagctggta | cctcatccct | gtcccctcct  | 34872767 |
| gcttccttcc | tctgcctcta  | tctatgcgtg | ccacatcata | tactgatggt  | 34872817 |
| ggcttcttcc | ctgtcccttc  | tacaaagtta | ggcctcagcc | tcagtctcta  | 34872867 |
| ccttccagga | gggtgacca   | catcatagtg | cttttaggcc | ctgctctgta  | 34872917 |
| tgtccttggt | ttctgggatg  | gtttgttgtc | cctggggaga | catttgaagg  | 34872967 |
| cacaaaccac | attgagccta  | tcagccaggg | taactgaaag | gttggatgca  | 34873017 |
| aggtaatgct | aaattaagaa  | ataatcattg | ggacagcgat | tccaaccatt  | 34873067 |
| atggggaggc | acaaatttcc  | cccacaatca | atccgtgaag | aactatggtg  | 34873117 |
| tgtagattgt | gtgggtcact  | tctggggatt | ctaaagggta | gacaaggcta  | 34873167 |
| tcagggtccc | tgcattcaga  | gcttttgagg | caggggtcag | taccttcatt  | 34873217 |
| cttatcttaa | agattccaga  | cggaagaga  | gctctacat  | ggccagcagt  | 34873267 |
| gccagtgagg | tcaccatgtc  | taaggccccg | actcacattc | tgcttgtccc  | 34873317 |
| cccctagCT  | ATGCCCCCTC  | AAATCATCCA | GTTCCCCGAG | GACCAGAAGG  | 34873367 |
| TGCGCGCAGG | AGAACCTGTG  | GAGCTGTTTG | GGAAAGTGGC | TGGCACCCAG  | 34873417 |
| CCCA       | CACCT       | GCAAGTGGAT | GAAGTTCCGA | AAGCAGgtca  | 34873467 |
| ccgggtggcc | tgaggacaac  | gccagccct  | gggcctaaaa | gatgagaaat  | 34873517 |
| gctgggtggc | cagggggcgg  | tgctctgttt | cactgtggaa | gtggaggaga  | 34873567 |
| gcactgggtg | tggtgataca  | tacctggaat | cccagcactc | ggaaggccaa  | 34873617 |
| ggcaagagaa | ttgcaagatc  | aaggccagcc | cagccaacct | tacagggtcc  | 34873667 |
| tgctcaaata | aaacacagag  | gccagggata | tagcctaata | tgatacatag  | 34873717 |
| caccccaaaa | cccggttacg  | gaaaaagaaa | gattgttaca | aaagaaagg   | 34873767 |
| gaaaggaaac | ctatccacca  | gacctgagtt | cttactgaca | tgttcttctg  | 34873817 |
| tttctaccaa | tgagccctgg  | ttttattggc | agtctgttta | ataaaattac  | 34873867 |
| tcctgccctc | atctgagtcc  | atctgcctag | aattcttttt | ggaggcagga  | 34873917 |
| agtcaaagcc | ctcaggtgac  | cccctcagac | accatcactg | ctgttctggc  | 34873967 |
| tggttaacag | cttccactta  | acacatgcta | aaagatcaaa | gcaagcctag  | 34874017 |
| gtatttgggt | atataaatta  | tgcattnaat | agaattttgg | ccgaatgacc  | 34874067 |
| cagaagtata | actacaattt  | ataatatgct | ccctatgaaa | acatttgaat  | 34874117 |
| ttccaaataa | ccggtttgga  | aaggaatttt | tcaggaccca | gcttctcagt  | 34874167 |
| gttcacactg | gtaatgacac  | tcatgtgtgt | gatcagcaga | catcccaatg  | 34874217 |
| tgctgggtgg | ttctgcactg  | ggaacctatt | agagcaatgg | ttcttgacct  | 34874267 |
| gtgggtcatg | acccttttgg  | agttgaatga | ccttctcact | aaagtcacct  | 34874317 |
| aagaccatca | gaaaacatag  | atatttatag | tacaattgat | aatagtaaca  | 34874367 |
| aaattacagt | tatgaaatag  | caacaaaata | attttatggt | ggggggggtc  | 34874417 |
| accaaattgg | agaaactata  | ttaaagggtc | acagcattag | gaagatcaaa  | 34874467 |
| aaccactttg | cagaagggtat | gaggattctt | tgtaagctct | gtcagcattc  | 34874517 |
| tcacaccatg | caaattgtca  | tgagatgagc | cacgagaacc | taggagggaa  | 34874567 |
| ggagaactag | ctctgagggg  | gatggagaag | aacatggggc | cctgcctgtc  | 34874617 |
| tagactgatg | ggtaaggcag  | aactgtgtcc | ctttcagagc | cagttaatcg  | 34874667 |
| agttcagtac | aaaacgtact  | gcagttatga | aacctttctg | catctgtgct  | 34874717 |
| ctccagtgtg | gtagccactg  | gccctgtctg | ttgagcgcac | ggaatgtggt  | 34874767 |
| taacacagtt | gagggatgtc  | ttcgtcactg | ttccgttgct | gtgaagaagc  | 34874817 |
| actgtgacca | aggcaactta  | taaaaggaag | cattcaactg | ggtcttgctt  | 34874867 |
| agaatttcag | agagcaagtc  | tgtgaccatt | gtgctgtgga | acatgggtggc | 34874917 |
| aggcaggcag | gcaggcatgg  | cactgcagca | gtagctgagg | ctttacatcc  | 34874967 |



|             |             |             |             |             |            |          |
|-------------|-------------|-------------|-------------|-------------|------------|----------|
| tgatctgcag  | aaagcaggca  | gacagagagt  | gagactgggg  | ctggcaaggg  | 34875017   |          |
| cttttgaaac  | ctcaaagccc  | cactcccagt  | gacacacctc  | caccaacaag  | 34875067   |          |
| accacatgtc  | ctaaacactc  | caatagctag  | ggaccaacca  | tccaaacaca  | 34875117   |          |
| cgagcctgtg  | gggaccactc  | tcattcaaac  | caccatgagg  | aactacagtt  | 34875167   |          |
| ttggtttggt  | tttttttttt  | tttttttcag  | tactaagggt  | tggatttttg  | 34875217   |          |
| atthagcct   | atgtatgcta  | ggcaagtgtc  | ctaccattaa  | gctacagctc  | 34875267   |          |
| caggcttctt  | ttttactttt  | tgagataggt  | cttactaagt  | tgtccaggct  | 34875317   |          |
| gtcctcgaac  | ttactaattt  | gtccaggcta  | gctgtgatcc  | atctgactcc  | 34875367   |          |
| tgagcagctg  | agatacaagc  | ctgtgtgcta  | ctatgtctga  | ctacattttt  | 34875417   |          |
| aactagttaa  | aatcacctt   | atacaattca  | atggcatcag  | tcaatacaca  | 34875467   |          |
| agactgtgta  | agcatcagat  | ttcctaatec  | ttcaccctag  | aagccagtgt  | 34875517   |          |
| gattcttccc  | cttcctcagt  | ctctgcccact | tctcccctaca | tgttattatt  | 34875567   |          |
| atgggcttgc  | ctgttctgga  | cagttcagat  | cgatgggatc  | atgcactctg  | 34875617   |          |
| gcatatccac  | ctttgtctct  | ggacatgggt  | ttggtttttg  | tttggttttg  | 34875667   |          |
| atgttgttat  | cttgtttttg  | ttttcttagt  | tttggggatt  | tttgtttggt  | 34875717   |          |
| tgtttttggt  | ttttgtttgt  | ttagtttggt  | ttggtctgat  | aggttgtttt  | 34875767   |          |
| tagggcttat  | caatgcttta  | gcataaattg  | ccatcctatt  | tctgtgtgtg  | 34875817   |          |
| tgtgtgtgtg  | tgtgtgtgtg  | tgtgtgtgtg  | tgtgtgctag  | aggacagcct  | 34875867   |          |
| cagggtgccac | cctgtcctct  | tcctcccttg  | agacaagggtg | tcttattggc  | 34875917   |          |
| ctgaagtata  | ccagttatac  | tagacttacc  | agttaagcta  | gccaacaatt  | 34875967   |          |
| cccaggcatc  | ctcctgtctc  | cacgccccca  | gcagtggcat  | tacaagtagg  | 34876017   |          |
| caccactaca  | ccagacaaga  | tggagtaacc  | cctgctccct  | cccactgtc   | 34876067   |          |
| ccgtttgtcc  | ttgagaatag  | acggtgagga  | gccccatttc  | tcactctcac  | 34876117   |          |
| ctgtaccgcg  | agATCCAGGA  | GAGCGAGCAT  | ATCAAGGTGG  | AGAATGGCGA  | 34876167   |          |
| GAGCGGCAGC  | AAGCTCACCA  | TCCTGGCCGC  | GCGGCAGGAG  | CACTGTGGCT  | 34876217   |          |
| GCTACACACT  | GGTGGTGGAG  | AACAAGCTGG  | GCAGCAGGCA  | GGCCCAAGTC  | 34876267   |          |
| AACCTCACGG  | TCGTG       | gtga        | gtccaggaaa  | cgctaagcaa  | gaagggcgag | 34876317 |
| gagtggggga  | caaagtgaac  | aaacccggg   | atgtcagcac  | cttcctcttg  | 34876367   |          |
| cttcctcggt  | ccccctgtct  | tctcctctcc  | ttactctcac  | acaatacctt  | 34876417   |          |
| gcaaactgat  | gcaggactcc  | atacctgcct  | ctgcttcacc  | accaccccc   | 34876467   |          |
| tagcatcttc  | cattccctga  | gtcccctcct  | tgtttctcgg  | gcgttcctgg  | 34876517   |          |
| ccattagaga  | tcccaagccc  | tcctgcccga  | ggctttttcg  | gtggattggt  | 34876567   |          |
| cacttcctct  | ggctcatgcc  | cccactgtc   | tgactccctt  | tgtgtcttag  | 34876617   |          |
| ttttcttttg  | ctgtgctgaa  | gcaccagatc  | aagacagctt  | agagaaggct  | 34876667   |          |
| gggttgattt  | ggggcttatg  | ttcctagagg  | gataagggtc  | catcaccatc  | 34876717   |          |
| acgggtgggga | gcatggcggc  | aggcaggcac  | caccgactg   | gagcagcacc  | 34876767   |          |
| aagagctctc  | atctcaacct  | acagacaaac  | agcagacagg  | accaacttga  | 34876817   |          |
| gacagctcac  | atcttttgaa  | accttaaagt  | ctccctccag  | ggacatactt  | 34876867   |          |
| cctctagcta  | gtccacacct  | cctaattctc  | ctcaaacaac  | caccaactag  | 34876917   |          |
| gaagcaagaa  | cttgtggggg  | gacatctgat  | tcaagcctgc  | aatccccac   | 34876967   |          |
| ctgggatcaa  | ggccacttcc  | tcttactttc  | aggggtcggg  | gcacggagac  | 34877017   |          |
| tgcacatcat  | acacactcca  | ggctatgctc  | tggtgccctt  | agacggagggt | 34877067   |          |
| atcagtgacc  | ttcagaactt  | ttatccttct  | ctggagacac  | gttccccgtt  | 34877117   |          |
| gccatcccc   | tgccccctcc  | ccactcccag  | gacacacaca  | aagcccttag  | 34877167   |          |
| gcctctagct  | tactgagaa   | ctacgaggca  | ttagactcct  | ctgaacttgg  | 34877217   |          |
| tggcctccag  | acctccagggt | acctgtacac  | catgccatca  | atggctcctg  | 34877267   |          |
| taccttgagg  | agggttcttt  | tctttgggtc  | agttcccagg  | ttctcaggac  | 34877317   |          |
| tccaccatcc  | tcagctcact  | cagcttttca  | tccccgctt   | gttccaacag  | 34877367   |          |

|             |            |             |             |             |          |
|-------------|------------|-------------|-------------|-------------|----------|
| cacaggcatt  | accccacccc | caccccctgc  | atcgattggc  | cttcctgcag  | 34877417 |
| tgctctgctt  | tctgtgcccc | agcccctggg  | ctaaccgggt  | ggcagagcag  | 34877467 |
| cctcaccctt  | tggcctctgg | ccctctgcag  | ctacctgccc  | cttaatccca  | 34877517 |
| tgttgcttgg  | tctagagaga | ctgtttctct  | aaggctactg  | tgattgctaa  | 34877567 |
| ccctaagttc  | ttcccctttc | tatatctctg  | agttcccagt  | aagctgaacc  | 34877617 |
| cctatattaga | ccgagtctca | agatttggtg  | ttgccttctt  | tcctagtaac  | 34877667 |
| tgtttttacg  | ttccgatctg | tcttctgaca  | catctaaatc  | gctttctatg  | 34877717 |
| tggcttcctc  | ccatgggtga | tgctcactgt  | ttccctcgg   | tcatggttcc  | 34877767 |
| ccttggtggca | gatgcatata | gtacagtaga  | gggacacaag  | aagggtgcagc | 34877817 |
| tagggggaca  | gtagactgtg | ttgtatgcct  | gtgtgggcct  | ccatataatg  | 34877867 |
| ggctcctgaa  | agactttggc | ctggtattta  | attgcataca  | cattagattt  | 34877917 |
| gagtagggtt  | tccagtcaat | cttggtcttc  | aagcttacag  | ggtttcaatt  | 34877967 |
| agacaaaggg  | gctcctttgg | gttcagtgtg  | aagactagtc  | cccaacttca  | 34878017 |
| cagcagggct  | cacacctaca | gaacaaaaga  | gtgttagaaa  | ggattcatga  | 34878067 |
| gccacagcgg  | ggatctgagg | aatgtcccaa  | gcatgaagtt  | ggcagttgga  | 34878117 |
| gaggactcag  | aggctctctt | agtgtctgtca | ctctgtggtc  | cctaactttg  | 34878167 |
| gtcccagtct  | tccttctcca | tctttatctc  | ctatcctcac  | cttaggccca  | 34878217 |
| aagtggatag  | gtatgtctcc | agccatgcag  | aagggaaact  | aagggagaag  | 34878267 |
| ctcatttcag  | actctcaaaa | gctgcccctc  | cagatgtgcc  | catggcctgt  | 34878317 |
| ggatggctaa  | agagtgaaga | atctctctaa  | gacagagaaa  | cctcttcctc  | 34878367 |
| agccttccca  | tctatctgcc | cctgtgtggg  | gtcaacaact  | ttaaactgcc  | 34878417 |
| tttctgaaac  | cagtgcccc  | taccccaatc  | ggggccaccc  | cggggcgtgc  | 34878467 |
| cacactcccc  | ttccccagc  | cccactgcgg  | gagctgcagt  | tctgaccttt  | 34878517 |
| tatggttgag  | tttctcattc | tccactgccg  | gtgctgacag  | ggccatcggg  | 34878567 |
| gtggctgcct  | gccagctggc | aggagcaaca  | tgtaaataatg | cgctcctagga | 34878617 |
| ggggaaatgga | atggggagca | ggctctctgt  | ctgcctcccc  | caccccagag  | 34878667 |
| ctaagaatag  | aatcgctcaa | taaaatgagg  | actcgtattg  | atggccacag  | 34878717 |
| cacagctaca  | tccattcaaa | gcccataaat  | ttagacttag  | gccaagtaa   | 34878767 |
| accaggatta  | acctgattta | cctgtgtgtc  | tccagggaca  | tctgcatatt  | 34878817 |
| atctgattgg  | ggtttattaa | gtagatataa  | acacaaatga  | gataaagtag  | 34878867 |
| atattgttcc  | acctattctg | gacagttttc  | aagcacttga  | aacgcatcca  | 34878917 |
| cttgatgggc  | cgactaaata | aggccactta  | aaagtgactt  | gtgctcctta  | 34878967 |
| gctgcagaag  | tctcttgtgg | catattctct  | gaagagctgc  | cttcttttca  | 34879017 |
| gatcactcaa  | gagtctcatt | ttcaaataca  | caaaagctag  | cccttcccc   | 34879067 |
| cccccaagtt  | ggtttaagtg | agggataact  | agctatttcc  | gaggctaatt  | 34879117 |
| attgtatttt  | aagaagcagc | ataagaatga  | ggtttgcagc  | ctggcctggg  | 34879167 |
| cctgcgcctg  | cgcttcttgg | gctgttctgt  | gtgacctggg  | agaggatgag  | 34879217 |
| ggaggagcag  | gggatccaga | tggattcttt  | aatgtcactc  | acccaacaca  | 34879267 |
| agaataacag  | gcctcctcct | aactctaagg  | gagaaaaaca  | aagtatcaag  | 34879317 |
| aacccaacct  | acaccaacta | cattctgagt  | ttaaagctga  | tgtgatttgg  | 34879367 |
| aagggctgga  | gatacgcctt | agagattccc  | ggcttaccag  | tgtaagcatg  | 34879417 |
| acactagctt  | ggtctcattc | tgctgacag   | catagaaagg  | acggaacctt  | 34879467 |
| gtctggatgc  | acagggttgt | gggactctcc  | tgtggccttg  | tccatgacta  | 34879517 |
| gtgagtggtc  | cggcttgctc | tgataatgca  | ccctgactaa  | aagcaacata  | 34879567 |
| gggagaaaag  | agtggattgg | ctcacaattc  | tggcttacag  | tccaccatct  | 34879617 |
| cagggctagg  | ctaggctaga | actcaggtcg  | ctagtcattt  | cacattcatg  | 34879667 |
| gccaagagcc  | gagagaccaa | atgcatcgcg  | gtgtgctctc  | ttgctctcag  | 34879717 |
| ttagcttact  | cccctcatac | tatccggttt  | gcctgccta   | gggaatctac  | 34879767 |

|             |             |             |             |            |          |
|-------------|-------------|-------------|-------------|------------|----------|
| agccacaatg  | gcctgagtct  | tcctgcctca  | gataacagtc  | aagacattcc | 34879817 |
| ccatagatac  | acccacaggc  | caacctgatc  | tgtgtaattc  | cttgттаagg | 34879867 |
| ctttcttccc  | agttgattca  | cggttgtatc  | agactgacag  | ttaaaactaa | 34879917 |
| ccagcacccg  | gaattcagcc  | tcagcctcag  | cctcttagag  | cctctttcca | 34879967 |
| agcgtgtgcc  | gtagtttagg  | ccagtagctg  | ttggattcag  | gatcagtgct | 34880017 |
| tggccatctc  | tgcaggccca  | gcccagacag  | acatggtgtg  | ggcaaacaca | 34880067 |
| aagagggcaa  | agggaaagccg | ggctgttggg  | aagcatcaca  | gacaaggttc | 34880117 |
| tctggtttcc  | cagcagtagc  | caccctctac  | tgagcacaaa  | ctcttgcagc | 34880167 |
| tggaaggatt  | tcccattctg  | ccagccatgt  | ctccagggag  | ccctgggaga | 34880217 |
| attccgagga  | agcatgggtc  | cagccgtagc  | cagcgagcca  | gtctcttggt | 34880267 |
| tgtcaggcac  | tgtccaggcc  | agatgtgtct  | gtcttttagca | gagaggctca | 34880317 |
| tgggagaacc  | ctgggtcccac | ccggtagtta  | gttcaactca  | tgtgggctct | 34880367 |
| gtacttgga   | aggataaaga  | gcatcagaca  | cagctctgag  | gataagcacg | 34880417 |
| gaggagggat  | cctacactcc  | tagcactcct  | gaacctttgt  | ggtccaagag | 34880467 |
| cgtcagggtt  | ataaagcaca  | caggcccagc  | accatgttcc  | agggaggttt | 34880517 |
| gtccttctgc  | tggtcacatg  | cgggcctgac  | cctttagtct  | cctaaaatag | 34880567 |
| tgatgagagt  | ggaacactaa  | gacaaacatg  | caagactctc  | tgaatgttcg | 34880617 |
| tgttcaaadc  | ccttcacatt  | ctgcttgtca  | tgcgagcctc  | ctccccatg  | 34880667 |
| gtctgcacct  | tctcctgtac  | tggctgaggg  | aagccccacc  | acgtgtaaat | 34880717 |
| tagtggtgcc  | tgtaccaagg  | gtaggtgcac  | acagcaactc  | ttcagcaacg | 34880767 |
| ttgatctctc  | caagttgttt  | ttttccagag  | caaaccagag  | agaaggcagt | 34880817 |
| cggccaatgg  | ccagggtcct  | tacttgtata  | aagctccatg  | actaagtctg | 34880867 |
| ccagaaggtc  | tggggcaggg  | acagtaagga  | cttctcctcc  | cctaccccca | 34880917 |
| ccctcacccc  | ccaagcaggc  | tccttcactt  | ccttagctga  | tttccagagg | 34880967 |
| acttgagcca  | cttgccgcta  | agaggattta  | gaataataaa  | catctttgcc | 34881017 |
| aacaccagaa  | atgtttctta  | aaaagaccaa  | tatatccttc  | agaacaaaca | 34881067 |
| gaatttctaa  | gagaacattt  | tcaacaacca  | gtgaaagcgg  | ctcacaattc | 34881117 |
| ctcctccacc  | agttgcagga  | ggcctcctgt  | gtcgccgggg  | aaagtaggaa | 34881167 |
| gtggccttga  | caggacttaa  | aacaaccagg  | agaagtggct  | ccttacagga | 34881217 |
| ggccaccagc  | ctcacagtga  | ggctgcctgc  | agtgatggga  | ggtggctctc | 34881267 |
| tgggagcaaa  | tgagtcccag  | gcagcaaaga  | ttaagctagt  | atatcaaaga | 34881317 |
| aggagacagg  | agattagggg  | taggcttcaa  | tgggtagagt  | gcctgcctgt | 34881367 |
| ctagggactg  | tgaaaccttg  | agttctgagc  | ccagcaccac  | atacaccagg | 34881417 |
| tgtcctgggg  | taatagaagt  | actaaacgta  | ctgaacacca  | gtcaggagga | 34881467 |
| tcagaagttc  | aggttcatct  | ttgactaggg  | aatgagttcc  | aggcccacgt | 34881517 |
| taggccttaa  | ctcatcataa  | ataaataaat  | aaataataaa  | ataaataaat | 34881567 |
| aaataaaatg  | gaggagaggt  | gagaaggaat  | atgtgtgtac  | atatgaatat | 34881617 |
| ccacaaaata  | aatatacagt  | taaaattgat  | attgaattat  | tttaaaataa | 34881667 |
| atthatttat  | ttaaattcac  | ttaaaactaa  | aaagaagggg  | aaaagaatta | 34881717 |
| aagtggagga  | ggggtgaaaa  | ggaatgttat  | gcacatagga  | atgtgcactt | 34881767 |
| ttatatthtg  | atgtgtgcag  | cctcacgaat  | acgtatccac  | acacagacat | 34881817 |
| acagagatgt  | tccttcacag  | agtcctaggg  | ccatthttca  | ggatcccttt | 34881867 |
| ggcctccctg  | tctggctggg  | cttcagagag  | gaaacagaag  | tacttacctg | 34881917 |
| tctgthttgct | tactcggtat  | acagacatac  | atgttaacac  | cattthtcca | 34881967 |
| gtgagaaaga  | caaacaagct  | agccttaaat  | thttctgactt | tcgcatacaa | 34882017 |
| atccacatca  | catagthtca  | attgctgttt  | tgtgagggaa  | ctcaaacttg | 34882067 |
| gttggthggag | aatgaaaggg  | thttctataat | tagcagatag  | ctgthactaa | 34882117 |
| caaacaact   | gcagaaacta  | accagagaag  | tagaagthtt  | gthtagataa | 34882167 |

|             |             |             |             |             |          |
|-------------|-------------|-------------|-------------|-------------|----------|
| gcaactaaga  | acacctgggg  | aaactcagag  | acttcattaa  | actgtagct   | 34882217 |
| gccatgattt  | ggcttgaact  | gagcagcctc  | actggtctaa  | gccaaggtca  | 34882267 |
| tccgggaggg  | aaggcggcca  | gccaaaaggg  | ccacttctct  | tctgtcttca  | 34882317 |
| gtccgttttt  | ctctctctta  | gccaaaggaca | ggaacgatat  | acaattgtgg  | 34882367 |
| ttcacttctg  | aaattctttc  | tctcattgca  | taccagtcac  | atgatagttg  | 34882417 |
| aagatggttg  | gtaaagggtt  | ttgcctggtg  | ataaaacttg  | tgtttggcat  | 34882467 |
| gtatggaatt  | ctgcagcact  | aaaacccaaa  | acagcaacga  | agaggaacgc  | 34882517 |
| aggagtgggt  | tttgtttttg  | tttttttcaa  | tccactataa  | agttagaaat  | 34882567 |
| aagcttctta  | ttaataataa  | caattggtca  | agttggccac  | cttctaagaa  | 34882617 |
| tacttcccaa  | cactctactg  | ttacctgcac  | tgcccatata  | aggaaattga  | 34882667 |
| agcacagagc  | atttaatagc  | tactgagcga  | ggacagatct  | ttgttcaaag  | 34882717 |
| ccaaattgac  | ctgatttaag  | agctttaaga  | tctactgtgc  | tatcaagccc  | 34882767 |
| ctcgaaggga  | caggtgtttc  | ccaagtccca  | aagaaagtgg  | tgtcacaggt  | 34882817 |
| cactggctct  | gggcctgaca  | gacacatggc  | cctccccctc  | gtcccccccc  | 34882867 |
| aaaaaacttt  | ctctcaaaac  | gtatttcatg  | ggaaatagtc  | tacaactcct  | 34882917 |
| acacagcttc  | ctagatctgt  | ttattctgaa  | aaaaaagtgt  | ttatgacttg  | 34882967 |
| gacaaagtac  | aggaaaccac  | gacttctggt  | ctgaataacc  | agccaaagat  | 34883017 |
| agagtttctt  | tcaagcaaga  | aactggtagg  | tttatgtgtt  | gcagccccag  | 34883067 |
| tggtgcatga  | aaagatgaga  | gccagacata  | gggaaccagg  | ctgggactca  | 34883117 |
| ctacctatgg  | cagagctaata | taaagaatgt  | ccatttagga  | ctggatgatg  | 34883167 |
| ctgggggatg  | gtgtgtgcat  | gagagagggg  | catcctggat  | tttattccca  | 34883217 |
| tcatgggggc  | tgagaacggt  | ctttctctgt  | agttgtatag  | aatttgagtg  | 34883267 |
| accttgtggt  | tcttcatccc  | cagATAAGCC  | AGACCCCCCG  | GCTGGCACAC  | 34883317 |
| CTTGTGCTTC  | TGACATTCGG  | AGTTCCTCAC  | TGACCCTGTC  | CTGGTATGGC  | 34883367 |
| TCCTCATATG  | ATGGGGGCAG  | TGCTGTACAG  | TCCTACAATG  | TGGAGATCTG  | 34883417 |
| GGACACAGAG  | GACAAGGTGT  | GGAAAGAGCT  | AGCCACGTGC  | CGCAGCacCT  | 34883467 |
| CTTTTAATGT  | CCAAGACCTG  | CTGCCTGACC  | GCGAGTACAA  | ATTCCGAGTG  | 34883517 |
| CGTGCAGTCA  | ACGTCTATGG  | AACCAGCGAG  | CCAAGCCAAG  | AGTCCGAGCT  | 34883567 |
| CACAGCTGTG  | GGAGAGAAAC  | CTGAAGgtag  | ggctgccttc  | agttcttcat  | 34883617 |
| gggcttaaaa  | ccaatatgca  | tgaacccaga  | cagatttcag  | agaggggagg  | 34883667 |
| agggaggttc  | agagagactg  | aatctagagg  | tgtgagaggc  | aatacctttg  | 34883717 |
| gtgctcttgg  | tttttaagac  | tgtgtggctg  | accatactt   | taaaagaagt  | 34883767 |
| tgatagggcc  | tttcaaaaac  | tcattagcca  | aagcactgag  | ggtgtagttc  | 34883817 |
| agtggcagaa  | tactttctta  | gcgtatggga  | agggttaggt  | tctatcactg  | 34883867 |
| atatcacact  | caatgaaaac  | attatgccgg  | aagttttggt  | accctgccac  | 34883917 |
| cgaggctgat  | gttttcatcg  | gcaggcaggc  | tgcaggtaga  | cttcaggctc  | 34883967 |
| ctgtgttcac  | ctctcgtctc  | ctctctgctt  | ctgttgctct  | cacaggtgag  | 34884017 |
| ggtctgctcc  | atgtcaggac  | ttaggatata  | gggcagagag  | agaacttaag  | 34884067 |
| ttgaggggtca | gtgagacaga  | cagcatctcg  | ctaagatgat  | ggaaataaag  | 34884117 |
| agaagaatgg  | gaagctttgc  | cagaggagct  | gaaaggcttc  | ctagaggagg  | 34884167 |
| cagcactgat  | gcttgggaag  | gagactggta  | cactgagatg  | ccgggaaaat  | 34884217 |
| agcacattcc  | acacagagga  | tgccacagcc  | cgagcaaggg  | taggaagtga  | 34884267 |
| cagaaactgg  | tggcattgga  | aagcttaaga  | gtagctaggg  | catacatcat  | 34884317 |
| gggaggtaga  | acagaaggaa  | taaaagtgaa  | aaagggtcgt  | ttggataaaa  | 34884367 |
| ttacaatgct  | ctccaaagct  | ttgcagacag  | gagacgatgt  | gatcgggtatt | 34884417 |
| ttagaaagga  | atcttgtgct  | gtagtggagc  | ttgtgccact  | ccaatatggc  | 34884467 |
| agccttctat  | cttctcatcc  | cagcatcccc  | aggcttctctg | aagcttcatt  | 34884517 |
| ttcacatgat  | ttgctcctgg  | aggcattcag  | gtacctatga  | tcatttgaga  | 34884567 |

|             |             |             |            |             |          |
|-------------|-------------|-------------|------------|-------------|----------|
| agccttaagg  | ttgctgatgg  | actagaagga  | tgagtttgga | gtcagcctgg  | 34884617 |
| tacctgatga  | gcctctgtga  | gcgcagccta  | gcagaggggt | gggaagggca  | 34884667 |
| tgagctgaac  | ctgcatagca  | tggactggac  | catattggct | gatttgggag  | 34884717 |
| tgaggggtatt | agagagggcc  | gagaggggttc | taagatgact | ctagttcctg  | 34884767 |
| tgctgagtta  | cagcatacat  | tcaagagaca  | actagaggtt | tattagcttg  | 34884817 |
| ggtcatgtgg  | ctgatgccac  | cattgagtat  | ctaccatata | ctaacagcat  | 34884867 |
| ccgtatcatt  | ctcttcagtc  | tccattcaac  | tactgcca   | cagcccagca  | 34884917 |
| aggcaggtat  | tgcccttgcc  | ctcctctgac  | aggggaaatg | gggatagagg  | 34884967 |
| ggtggagctt  | cttgcctaag  | gtcacagagc  | ttatgaataa | tgagtaggag  | 34885017 |
| cttgaccca   | gagctgtcta  | gccagcgcct  | tgttctcctc | tggtcagatg  | 34885067 |
| gagggaaagag | gttagttggg  | ctgtctccct  | actgacctag | ggtacttgaa  | 34885117 |
| agtaagataa  | cagagaggct  | gggagaagat  | gaagggtttg | gtttcagact  | 34885167 |
| agtttagtag  | agccatctga  | gggaaaccca  | ggcattgggt | cccaacctta  | 34885217 |
| ggaggaaggg  | tcaacaaggg  | gctctagatt  | tgaaaaactt | ccctgtttaa  | 34885267 |
| tggacaactg  | aatgacatca  | atgaggtcac  | ccagaggtta | gagaagtcaa  | 34885317 |
| cattaatgcc  | acagtgtgaa  | agcccatggg  | tctagaagaa | atctggaatt  | 34885367 |
| agttcactgt  | ggacatcggg  | agcggggcaa  | gtttcaagtg | aactggatta  | 34885417 |
| acgcaaaga   | gatggggcct  | cgggatcatt  | gggattacct | gttgtctgat  | 34885467 |
| agtgatcttt  | gaaataagag  | tccatagagt  | ttccacagtg | tggaaaatgg  | 34885517 |
| ttccctggt   | gagggaatga  | atggaagagg  | acagaaggat | ggggtgttat  | 34885567 |
| tgccgagttt  | taagcaaaga  | gaggggggga  | aagtgttggt | gatttaagac  | 34885617 |
| agagaaagtg  | gcgaacagaa  | gggacattac  | tcttggggag | atattaaggg  | 34885667 |
| agtcaagtag  | acaccattgt  | gggacactct  | ggtatcgaag | gagaaagcca  | 34885717 |
| tcttggagg   | accatgtaac  | ccaggggcac  | cctgagtgtg | aagctgtctt  | 34885767 |
| tatgataacc  | cccagaattt  | ccaaagttag  | gtatagaaca | gccctcaagt  | 34885817 |
| taagcgaggg  | ctccagagag  | aaggaagaag  | atgctagtgg | ataaaccagc  | 34885867 |
| ttcacactgt  | catccagcca  | gtcgcaggct  | ggaaaccttc | acttccaaac  | 34885917 |
| ccttgggacg  | tagtcaggca  | tgactctgtg  | ataaccacgt | tgtcccagag  | 34885967 |
| gaagctgacc  | tgggccctgg  | ctcatggcta  | tgatctgctg | gaggctcaca  | 34886017 |
| gcgtatggtg  | gggaaactga  | atatcaaagc  | caccatctgc | tgccctccta  | 34886067 |
| acactctaac  | acacatgcat  | accatacaca  | cacacataca | cacacacaca  | 34886117 |
| tacaccatcc  | ttctgcagtg  | gacaacttag  | gccaccaca  | ggatacagtt  | 34886167 |
| gggtcatgga  | gcatttttaa  | gatatttctt  | ggggagcaat | aggtagagaa  | 34886217 |
| aacctgttcg  | ttgactggct  | cgaagccatc  | caggccctgc | tgtagaaacc  | 34886267 |
| agaaacgacc  | agaataacctg | atcaacctga  | gaaactgggt | ggaggagagg  | 34886317 |
| catgactttc  | aggaggccag  | agctgtggca  | cccaggactg | tagagaatgg  | 34886367 |
| catgctgatg  | ggcagtggcc  | tggcccttga  | gctccacagc | aggctgcctt  | 34886417 |
| gtgtagcctc  | cagaacctc   | ccactgctgc  | agacaaaca  | atggagggat  | 34886467 |
| tgccctgaaat | ccagaggaag  | ggtccggggc  | accagggct  | tcccagacagg | 34886517 |
| aagctactcc  | tactccaggc  | ctagttgtct  | tatccaagag | gggggaggag  | 34886567 |
| gggaagaact  | gtttacacaa  | gctaggcctg  | agcacagagg | acagggagaa  | 34886617 |
| aagggaaagag | gagagaggtg  | tggggatgtc  | ccaagccaaa | gtcgtctgtg  | 34886667 |
| gacttcaaag  | gacttctgtg  | gactccttgg  | gtactgtgag | ttccaagcaa  | 34886717 |
| gtgtagctct  | ctacttgagg  | ggggagtggc  | tcttttgagg | gtgtgggtggg | 34886767 |
| gaatgcgtgt  | gtgagtgttg  | gtggattaat  | gggagaagca | gcagtcatcg  | 34886817 |
| aggtcacttc  | agtggcgtga  | cgtggcgtga  | ctcttatgaa | aatcggtgcc  | 34886867 |
| aatcaaccct  | cagtcacaa   | gcaccgtgca  | ctgggttggc | tctttccatc  | 34886917 |
| ctaaccaccag | tcttgtcctg  | gcagcttcag  | ttttcacctc | atcttgatcc  | 34886967 |

|            |             |            |             |            |          |
|------------|-------------|------------|-------------|------------|----------|
| tccggtccat | ctattttcaa  | cccattcacc | cacaggtgtc  | ctgtatccct | 34887017 |
| ccagtattgc | tggggctgcc  | ccacacactg | aggatacagc  | gggagactga | 34887067 |
| aatggggggc | ttaccatcag  | ccccaggct  | tgcctattcc  | agagccatct | 34887117 |
| ttcagatccg | gaacctgaca  | gcattttgcc | caatctcact  | aggcctaagt | 34887167 |
| gaacagagcc | ccccaccttg  | atgcccattt | cagccacgtt  | ttagatgccg | 34887217 |
| ctcccggctg | atcctgctga  | ctctgaagtt | ccccccacc   | ccatccttgt | 34887267 |
| ccctactcct | aatttgtcct  | aggctataga | gttattagca  | aaacagctgt | 34887317 |
| gactgaggct | tcttgccagt  | cagctccttg | tatccaagag  | cagttggaac | 34887367 |
| tccatagcta | ggctgtgtct  | ctgcagggt  | cccagaagct  | gtatccagag | 34887417 |
| ccacactgcc | ctccagtgt   | cactaagcgc | acagccgtac  | agaaaggaat | 34887467 |
| agcgtcctc  | tgtctgggag  | agttgctggg | gcctgctttg  | tgagggcca  | 34887517 |
| gagttttcct | ctccaaatac  | caccccaggg | tgatgaggct  | catttgttta | 34887567 |
| cgggagcacc | tctttcaaata | agctcctggg | tttatggttc  | attctaaata | 34887617 |
| gatttttaag | aaattgtgtg  | tatgagtggt | tttgctgca   | tgtatgtctg | 34887667 |
| tataccacat | gcatgccttc  | tgaggaggtc | agaagagggc  | gtcagatacc | 34887717 |
| ctggaactgg | agtcacagac  | catcgttagc | tgggaatcta  | accccagtg  | 34887767 |
| ctcttaatct | ctgagccatg  | tccccaacac | actaaataga  | ttttttttt  | 34887817 |
| aaaagttttt | ttagttgaag  | tcctttcttt | cataattgtc  | atctccttct | 34887867 |
| ttcatggaaa | gagggacacc  | aagggttcat | ctgtgagatg  | gctgctacct | 34887917 |
| tttgtgggtc | aggagctcag  | ctcactgagg | cgtgatttct  | ctcaactctt | 34887967 |
| ccctgcctg  | ccacttttgt  | tcactcttgc | ccacaactag  | aaaggaggca | 34888017 |
| gactccagca | tcccaggatc  | tcagtccttc | caaaggaagg  | caggcaggca | 34888067 |
| tggcgctcac | atgggcaagc  | atggcgctca | catgggaggc  | caggccagga | 34888117 |
| accagctgt  | gactggaggc  | agggtaatgg | gaagaggcca  | aaccagAAC  | 34888167 |
| taagtccctc | ttcaaggcta  | gctgagaaaa | gcctgtgtct  | cagtggctgg | 34888217 |
| caaggcccc  | taatggcttg  | tagcattgtg | tcactctgtc  | acaagcagag | 34888267 |
| cacaaaccac | ttttctacac  | accagacgga | gaaagcctgc  | attggctttc | 34888317 |
| ttacactgct | gctcagaaca  | ccgtttccat | gccagccgga  | agtagcaggg | 34888367 |
| gacaaagaaa | acaaagcgc   | tctccgtacc | ttgtccaact  | ccatcctagc | 34888417 |
| cttctagctg | cccacagctg  | gtgtcctggg | aacagacacc  | caaagctcta | 34888467 |
| ccagtcatcc | ttgggtcatc  | cttgccattg | ctgggggtatc | ccgcaccact | 34888517 |
| cagtgccagc | catatggatc  | tcaaagcatg | gtagttagct  | cctcctggcc | 34888567 |
| cctacgctgt | ccccggcccc  | ctacgccatc | cccggccatc  | tgcctttccc | 34888617 |
| gttttgcttt | cccatggctg  | ttctccatgt | cgctcttcca  | aggcatcttg | 34888667 |
| tgtttagttt | tctaaagcta  | aactttgtca | gtcgcactctg | aagaactcta | 34888717 |
| aacagatcac | agcttctggg  | tttatgctta | taaactctta  | gaaccccctt | 34888767 |
| ttacctgct  | ttggcaagag  | gtacttacct | atatgggctt  | gggttagttt | 34888817 |
| tcctctgggt | gtctgttttag | gttccagcgc | gttcagtcct  | cagtctgaag | 34888867 |
| gatacacttg | ccatcctcag  | gtccagctgc | ccctgctccc  | tggccctccc | 34888917 |
| ctcctgccc  | ccccagacaa  | ggacatgata | aagccctgca  | gaactcggca | 34888967 |
| tgctagtgtg | cagccctccc  | tgctgcagct | gtctggcaaa  | ccctttgggg | 34889017 |
| tactgtcctc | ccaagacaag  | cacccccaca | gctgtgtccc  | cagctttgct | 34889067 |
| ctgatggcag | cgtcagcaag  | ttagccattc | cccaccaggc  | tcccttccac | 34889117 |
| actccaacac | acctctacac  | tctctcccc  | acacacatct  | aatttacact | 34889167 |
| tacacactga | tattatacca  | cccacatata | catttgcacc  | tgtcacacac | 34889217 |
| acatacaaat | acacacaggc  | aaatgcacgt | tctcactctg  | cccctcacgc | 34889267 |
| atttatctcc | cacttaaaca  | accctgtcct | acacacacgc  | acattcaccc | 34889317 |
| acacatgtgt | acacgcttac  | atatatgact | gcactatctg  | cactcacata | 34889367 |

|               |              |               |               |              |          |
|---------------|--------------|---------------|---------------|--------------|----------|
| catccacact    | acaccacatg   | ggtgtagtta    | cacttctatg    | ctaacctaca   | 34889417 |
| cacagacaga    | cacttccata   | ctagtcttca    | cagataaagt    | cacacacttc   | 34889467 |
| catgctatta    | catgcacaca   | catattctgt    | gccatctcac    | agacacagtc   | 34889517 |
| acacacctct    | ctacactatc   | acatgcacgt    | atatgctatc    | ctacacatat   | 34889567 |
| acacatatct    | ggtacatata   | cactcacaca    | agtctatgct    | atcccataca   | 34889617 |
| aatgcaactca   | tagacttcca   | cactcacacc    | tccatgctgt    | ccctcacaca   | 34889667 |
| tacactcaca    | ccatcccata   | atatccccat    | atactcacat    | tattatacac   | 34889717 |
| ttcaaaacca    | ctccatacac   | atagactctc    | acacacttgc    | ccactatccc   | 34889767 |
| atgcacacat    | accttctcct   | cagactgtca    | catccacaca    | cttccatact   | 34889817 |
| gtccccatt     | ctcatgccct   | cacctatctc    | cgcactatca    | tccttgca     | 34889867 |
| cacatactca    | ttcatctcac   | atgtgtgtgc    | ttacactctg    | tcacacgcat   | 34889917 |
| gctcaactctc   | acacacgtht   | ccatttccct    | gtcatcacgt    | ttatgthtggc  | 34889967 |
| cgtgtcctcg    | ctgttttctc   | caggacacct    | ctgttcatcc    | atccctcagc   | 34890017 |
| catgatggct    | gaggaccccc   | aaagtgttag    | aagtcacatg    | tatggctcct   | 34890067 |
| tcctcttaca    | gacaaggagt   | ctgaggttca    | gaaagaaaa     | gatacttggc   | 34890117 |
| ccagatcagg    | aagttagatg   | cctgccagga    | caaaggaaac    | ctggggthtct  | 34890167 |
| gaagtagata    | ggctctgggg   | tcctctcgcc    | tgtctcttcc    | cctagcctgg   | 34890217 |
| tgtatgcata    | agagcagccc   | ccttgggtgc    | tccttgatgc    | tcgctcgcta   | 34890267 |
| gcttctgtg     | caccatcatt   | cacccccatt    | gcattccatc    | ttctcctggg   | 34890317 |
| aggccactca    | agggcacctt   | ctgagaacag    | tggcgggctt    | tgccattgtc   | 34890367 |
| ctgggtgtct    | ccttctccac   | tgtttgtttg    | gtgccacgat    | ggtatatgct   | 34890417 |
| tcctgatatg    | acatatgtag   | ctggaacttg    | cttcaagtht    | ctatggthttht | 34890467 |
| gtccatacac    | ataaattaag   | agctttgggg    | aggagagagt    | gthtcttgtg   | 34890517 |
| tgtgtthtgt    | gtcgtgtgcc   | cgcctcgctg    | gcaagatgct    | tgctatactg   | 34890567 |
| ctagaatacc    | ataacaaata   | ttcaccgagt    | gtataagcag    | atttaacaat   | 34890617 |
| ggaagtaatt    | ataggttgat   | gactthtcaa    | gccatgaact    | tgaaagctag   | 34890667 |
| tgcgagtgtc    | actgttgat    | gthtggthtctg  | aagtacccaa    | ggactacaag   | 34890717 |
| aaaggthtcat   | gaggaaataa   | atggctggca    | gtcaactggta   | agaggagagt   | 34890767 |
| ttgaaggthtca  | gacatggthtgg | aggagthtccag  | aggthtgggct   | gaggagacca   | 34890817 |
| gagcttgcca    | atatgtatct   | ggctcctthttht | ccagthtccagaa | ctggcccact   | 34890867 |
| tcaggggatg    | tctgtgtgag   | tcaggtgctc    | tgggacctgg    | ggaagcccc    | 34890917 |
| atcatgcctt    | gctctgggta   | gccttcagta    | ctaataccaca   | tgthtctthtct | 34890967 |
| gaacctcctt    | gtctcctcca   | gAGCCAAAGG    | ATGAAGTGG     | AGTGTCCGAT   | 34891017 |
| GATGgtgagt    | gaggccggct   | gtctthtggga   | caggatcttg    | ggatgaagg    | 34891067 |
| gctgggaagg    | gggaatctca   | tggctcacac    | ccacctgac     | ctgtgcccc    | 34891117 |
| cagACGAAA     | GGAACCTGAG   | GTTGATTACC    | GGACGGTGAC    | TGTTAACTACT  | 34891167 |
| GAACAGAAAG    | TGTCTGATGT   | GTATGACATT    | GAAGAGCGAC    | TAGGATCgta   | 34891217 |
| agtggagthttht | ataactgcct   | ctgggcccc     | gggtacaggt    | acaggacctg   | 34891267 |
| cagthtcatcc   | cagcacctct   | tcctgtgttc    | tctcagacac    | cgcttcttcc   | 34891317 |
| aaaaccaaga    | gtctccagat   | ggggagggaa    | tgactcacag    | gctcatgcct   | 34891367 |
| caccaggggc    | cttctctgga   | gctgctcctg    | tggctctgta    | cagacctcagc  | 34891417 |
| tctgtaggag    | ccttaggtga   | ggccccctat    | gtctctgctc    | acagcacagc   | 34891467 |
| accaaacgga    | aggacggggt   | ttgaatcaag    | tctthtagcat   | cccttgca     | 34891517 |
| gggtccaaag    | tagctcagct   | tggctctcct    | tctctgthttht  | attgacagTG   | 34891567 |
| GGAAgTTTGG    | ACAAGTCTTC   | CGACTTGTGG    | AAAAGAAAAC    | TGGAAAATC    | 34891617 |
| TGGGCAGGGA    | AATTTTTCAA   | GCCCTATTCC    | GCCAAGGAGA    | AAGACAACAT   | 34891667 |
| CCGTCAGGAG    | ATCAGCATCA   | TGAACTGCCT    | CCACCACCC     | AAGCTGGTCC   | 34891717 |
| AGTGTGTGGA    | TGCCTTCGAA   | GAAAAGGCCA    | ACATTGTCAT    | GTTCTGGAG    | 34891767 |

|             |             |             |             |            |          |
|-------------|-------------|-------------|-------------|------------|----------|
| ATgtgagtgg  | caccgtagtc  | tgagaacctc  | ttcctgtgtc  | cttcccactg | 34891817 |
| tcccaacca   | gccacctctg  | ccacacaagg  | tgtgatgggc  | aagatactca | 34891867 |
| ctgtcaccag  | gaccatggct  | gatcagtg    | gga         | gaccatggct | 34891917 |
| caactgagcag | cagtctgcta  | gccttggggac | cctgttacc   | actgtcctcc | 34891967 |
| tgacttcttg  | tctaattctta | tctttttaa   | atataaattc  | acactaaaa  | 34892017 |
| tgataagaaa  | acagaaaatg  | gtcttactcc  | catccattca  | ttcatctttc | 34892067 |
| ctgtttctac  | actactagag  | gcaaatcatg  | ggggggggg   | ggggcgtttc | 34892117 |
| ttatattctt  | caaagttct   | ttataaaaat  | gcaagcagag  | atataacatc | 34892167 |
| tgcatTTTTA  | ctgtcctgga  | atTTatcaca  | atgtgtgcct  | tgaactcagt | 34892217 |
| gtccagcact  | gggtagtttt  | cagtaagctg  | atatcacaag  | ccttgggtcc | 34892267 |
| tctgaactcc  | gagggacctc  | aggttacata  | caccacgggtg | tgcatTTgag | 34892317 |
| ccatctgcgt  | ttgataagag  | accgggtggg  | ttcatgcctc  | tttcgctttt | 34892367 |
| gcgagcattg  | cttgccacct  | tgtgcatgtg  | tattttccat  | gacgcctgtg | 34892417 |
| cacacccatg  | gcctccgtcc  | cagaaatgaa  | agttcacaag  | gtgaaagggc | 34892467 |
| acgttcattt  | gaggattttc  | aaggtatcct  | caggctgcac  | atcctgagct | 34892517 |
| tcagaatcag  | ttctttggag  | aagagaagct  | ttctactctg  | gctggcgctc | 34892567 |
| ttgcgcagga  | ggggccaggc  | ccgatggctg  | cctcttctca  | ccccccctca | 34892617 |
| cagtgcatt   | aggcatgttc  | ctctcagaaa  | gcgctcttgg  | gacagacaaa | 34892667 |
| aacggttgaa  | agtgcagatc  | agagtcagtt  | aaccttacgc  | agatcccagc | 34892717 |
| cgcaccccac  | atgatgtgac  | cttgaataag  | ttaatcagct  | ctgacaatcc | 34892767 |
| ttagtttcac  | tgtgaacagc  | ctgttctctc  | tctctctccc  | tctctctctc | 34892817 |
| tctctctctg  | tctctctgtc  | tctctctctc  | tctctgtctc  | tctctctctc | 34892867 |
| tctctctctt  | ctctctgtct  | ctctgtctct  | ctctctctct  | ctgtctctct | 34892917 |
| ctctctctct  | ctctctctct  | ctctctcttc  | tctctcacac  | acacacagtg | 34892967 |
| gatgctgtgg  | gattaggtag  | aattgttctg  | tgaggctcag  | tgctcggcca | 34893017 |
| tagactgcta  | ttaaaagagt  | gatgggttga  | cttttccctg  | tattctgggt | 34893067 |
| tgTTTTccac  | ttaaaagtag  | ccctggagca  | ttttagcatc  | tacgtagctg | 34893117 |
| ctgtggatca  | agtcctttct  | aattctcaga  | aagccagcct  | tcaagctctc | 34893167 |
| tgactactga  | aatgagattt  | tttattttta  | attgttaggt  | cctaccagcc | 34893217 |
| aaagggatt   | tagattaaat  | aatatcaagg  | ctcccacttg  | gctgtagaat | 34893267 |
| tctactttcc  | ttagaatcat  | aaacgactca  | gagaatatct  | tcatcagtat | 34893317 |
| tttttggtca  | ggttcaccac  | caccactttt  | taggaatatt  | acctccctgc | 34893367 |
| ctgtgactct  | gtcacggctc  | tccaagtctt  | tgtggactga  | gaattcctat | 34893417 |
| ttgttttaga  | gtggattgct  | tagtttgtac  | agtgtgggta  | cgtgaggaca | 34893467 |
| tggagaaaag  | tcttatcttt  | agaagttaaa  | ccttaggcaa  | gttcacagca | 34893517 |
| gagggcgga   | ggggtggcag  | gaggcaggca  | aacctgggta  | agggcagctc | 34893567 |
| gcagcaccag  | tgggcagaat  | accatactta  | gcttgggaat  | gggacttggc | 34893617 |
| aagctgggtg  | gaaaaaaggc  | agagaaatgt  | aaggaggttt  | cagctggtct | 34893667 |
| ggcttccatc  | cccacacccc  | actcctcccc  | cacggacaga  | gcgagtctca | 34893717 |
| caagcataga  | tgccagatcg  | gcctctattg  | aggtgaggat  | taagattgcc | 34893767 |
| ctgtgatagg  | aactgaacca  | gggctcttcc  | cttccaacct  | agtccaacat | 34893817 |
| atagccacaa  | gcaaagaaaa  | ggttgacggg  | cagcaggcca  | gttgagagaa | 34893867 |
| attaaatgta  | ttccagagtc  | ccagcctcag  | atatgtagga  | aataaggaag | 34893917 |
| aatacgtctg  | cagcctgtct  | gacttttggg  | ttctggacag  | gccccagctg | 34893967 |
| tacaggagca  | agggcccttc  | tggctactgc  | ctgggcttgg  | gcttctcttt | 34894017 |
| ttggaagtgc  | ttgggactgt  | ccaagtgggtg | atgggtccct  | gagccctgga | 34894067 |
| gaagatatga  | agtttcaact  | ggataccggg  | gactgatgtc  | atctttgctc | 34894117 |
| tactgttagc  | aacatttata  | aaagagcatc  | cagctggctg  | ccaagaggca | 34894167 |



|             |             |             |            |             |          |
|-------------|-------------|-------------|------------|-------------|----------|
| aagagtagag  | actaggtacc  | aagccctgga  | tagcattgtc | ctctctggct  | 34894217 |
| gccggggaaa  | gctagcccag  | acttgcagtt  | ctggggataa | gcttggcccc  | 34894267 |
| ttgggatgag  | tactgtttgt  | gatagtatcc  | gttcatttat | tcactcaata  | 34894317 |
| tcagttttatt | aagaacacat  | ttcatctggc  | accgtcttgg | cccatttctg  | 34894367 |
| tagatagcag  | acagaactat  | gaaacttggg  | acttagctcc | ttccataccg  | 34894417 |
| ggaagtgact  | gaagaagaac  | tttaaagata  | tatttgatac | agctgaatag  | 34894467 |
| atgtgagcct  | atgtgaaccg  | ataatgagta  | ggtcatctac | ctctagaaat  | 34894517 |
| gcagccctgt  | gagcttctctg | gcttagacat  | ctacacttac | tgctcagaac  | 34894567 |
| ctccccctgg  | aagttgaaat  | aatgactgct  | ttcttagcac | attttaaact  | 34894617 |
| tagaggccac  | tatctggggg  | tgtaccttgt  | ttgtaccaga | tactagcagc  | 34894667 |
| ggcaagtaaa  | atcctggaga  | tgatgagcca  | ggcttcatgc | agctatgagg  | 34894717 |
| accagcaact  | gagacaagac  | aggcttgata  | caaaaagtac | aggcacaagg  | 34894767 |
| catggagagc  | ctcagaagga  | agtatcattt  | gtgtagaagt | aggggaagggc | 34894817 |
| tttgccaaga  | acttgagcct  | cagtgcctca  | caggatttaa | agtagagtat  | 34894867 |
| gccagggttt  | cccagacatg  | tctggccatt  | caagtgacct | agggactttt  | 34894917 |
| aaaatacggg  | tcttcagatt  | ccttctaaga  | ttttacaaaa | gaaaatctct  | 34894967 |
| gaggggaagat | attgggaatc  | tgtattttct  | catatatgta | tatatagata  | 34895017 |
| tatcatttta  | aattattttac | ttatttat    | tatatgcatt | ggtgtcttgc  | 34895067 |
| cttcgggcat  | gtctgtgtga  | agggtttgga  | tatcctggag | ctccgtttac  | 34895117 |
| agacagttgt  | gagattccct  | atgggttctg  | agaattgaac | ccaggtcctc  | 34895167 |
| tggacaagca  | gccagtgtct  | tcaacctgtg  | agtcattctc | ccagcccaa   | 34895217 |
| gaatctatat  | gttcaacata  | agtctaaatg  | actctttaa  | aggaaaaata  | 34895267 |
| tatatataac  | atgctagtac  | ccttctgcat  | agtttgccta | tagtgttaac  | 34895317 |
| tcaacaggta  | gtgatgttat  | tatccatata  | ttacagatga | agatattgta  | 34895367 |
| gctatggcct  | gacaatagag  | tttgtcttag  | agctttcctg | gaaatcagta  | 34895417 |
| gaaatgaagg  | cttcaggaca  | agaggcacca  | cctgctggct | ctgcagggtc  | 34895467 |
| tttcttctct  | gggtggttct  | aaagtatctg  | ttctagctcc | ttctagtggc  | 34895517 |
| cagtgggtact | ttctaaccac  | tcccggactc  | agctcttcca | gaggagtcat  | 34895567 |
| acagtgatgg  | agggtgtacag | gctctgtcgt  | cttcttgtct | gtctctcctg  | 34895617 |
| caagatcagt  | gacaaggaac  | tacctgggtcc | aaaatcacag | cttctaaaac  | 34895667 |
| tcagagattg  | gattcacacc  | tggctctgtg  | cattcttgat | gactccctat  | 34895717 |
| aggggagcct  | gtacgtacag  | tactagaagt  | ggactgaaag | tccactgtag  | 34895767 |
| caaactgcca  | ggttactgcc  | acctggatgc  | cacataggtc | agcgtgggta  | 34895817 |
| gggctctaaa  | tctctgagg   | agtgggcagg  | agaagtgggt | ctggaggcct  | 34895867 |
| gaggtggggg  | atcagaggag  | acagcaaacc  | tcagacatca | gggctgtgca  | 34895917 |
| tatacacgga  | gcagtatgct  | ggctgcctga  | ggttagcagt | gggatgcca   | 34895967 |
| gttgtggcct  | ctagacatgg  | agtggattgc  | acacaccag  | gacacaacat  | 34896017 |
| ttaccaggta  | gagaggcaag  | gaaggcattc  | tagcaagaca | agttagctat  | 34896067 |
| ggctggagag  | agtgaaatct  | cacagtcagc  | agttctatta | taactgctat  | 34896117 |
| gcaattggct  | acgtccaacc  | aacaccagaa  | actttattga | agattctcat  | 34896167 |
| tatcaatgat  | cgtttctctgt | tcccagctgt  | acaagcatat | tcttctat    | 34896217 |
| tgtaaggaag  | tgactat     | aaatgtcagc  | tccctgtacc | taaaaggcac  | 34896267 |
| agctaggggtc | tatgagagaa  | aacgactact  | agggatcacc | cttctaaata  | 34896317 |
| agggcagctc  | gttcataatt  | ttcccttcat  | gcctggcctg | agggctccc   | 34896367 |
| agatttcagg  | tgcttccctg  | agcattctag  | tagcctaata | ggtgtatgtg  | 34896417 |
| tagatgagtg  | aatggccatc  | tagtagccta  | gtaggtgcat | gtgtagatga  | 34896467 |
| gtgaatgggg  | cctggaaagc  | tgtgggaact  | tggctcatgc | acacgcacgc  | 34896517 |
| acgcatgcac  | gcacaggcac  | actggcctac  | cttggcagga | caccctgcca  | 34896567 |

|             |             |            |             |            |          |
|-------------|-------------|------------|-------------|------------|----------|
| tcctgcccc   | tagcgtccta  | ttgtgtgact | gcagtgcat   | ttctgcctct | 34896617 |
| gcctgtcccc  | acagCGTGTC  | CGGGGGTGAG | CTGTTTGAGC  | GTATCATTGA | 34896667 |
| CGAGGACTTC  | GAGCTGACGG  | AGCGGGAGTG | TATCAAGTAC  | ATGAGGCAGA | 34896717 |
| TCTCGGAAGG  | GGTGGAGTAC  | ATCCACAAGC | AGGGCATTGT  | GCACCTGGAC | 34896767 |
| CTCAAGCCCG  | AGAACATCAT  | GTGTGTCAAC | AAGACAGGCA  | CCAGGATCAA | 34896817 |
| GCTCATTGAC  | TTCGGCCTGG  | CACGGAGACT | CGgtaaggcc  | cgtctacctg | 34896867 |
| gcccggcatt  | gctactgtgt  | ggtggcagtg | gttgggtcct  | acacactgca | 34896917 |
| tgtcggaaat  | gttcaatgtc  | ggagccaaag | tcccagacca  | gtaagacttc | 34896967 |
| tcaggttcaa  | atccagccca  | taccactggc | tgctgtatca  | ttctaaacca | 34897017 |
| agttcctttt  | ctgtaagggg  | gacttaacag | ctcctgctcc  | gaagggttgt | 34897067 |
| tgagctgcta  | atacacagta  | gaaacagtcc | ttacacacag  | taggcacttt | 34897117 |
| ggccctcact  | gaatatgtga  | tgatggcaac | gggtgctggt  | gatgatgatg | 34897167 |
| atgataatga  | caatgacatt  | agtgacaaca | actcattttg  | gtggtgatgg | 34897217 |
| ctcctcacat  | ctgcattatg  | ttacattcct | tcacattcaa  | agaaagtgta | 34897267 |
| tatataacca  | gtctcattta  | tcctcactca | gaggaagggt  | aagaatttgt | 34897317 |
| aggctagggg  | acacaagatt  | gtccagagct | ttgtccagca  | gattcccacc | 34897367 |
| atggggccagt | gacatgctga  | ggctggacat | agggaccctg  | gaccagctc  | 34897417 |
| agcatgctct  | gctctcagcg  | ctttgctatt | tcattcccaa  | cttctgagat | 34897467 |
| cttcagcagg  | aagaagggtg  | gtgtgtgtgg | gggggggggg  | ggtgatcaga | 34897517 |
| acctctttcc  | aggaactgaa  | ttctttatgg | tcagcagctg  | cgctcatgt  | 34897567 |
| ccctccctct  | cccatgtcca  | ccctgcccct | acagctctct  | ggctctctca | 34897617 |
| ctgagcagca  | ttcttccttc  | ccttcctctc | ctcctagaca  | ctgttctggt | 34897667 |
| aatacacagc  | catggagctg  | gagtgagcca | gcctttattc  | tgccaccctt | 34897717 |
| ggagaagcaa  | gaaatacttg  | gacgagataa | tgctagtaa   | acctccctgt | 34897767 |
| cccaggtgag  | gctgtgccga  | tcacccggag | gacactgacg  | gctcagtgag | 34897817 |
| gtcctcctag  | acctggactt  | gcttgattgt | cagcacagta  | tggccagagc | 34897867 |
| cttcctggt   | actgagaaga  | tatgcctcta | ctcttttctg  | ccacaaggag | 34897917 |
| gggtagagac  | agtggccact  | acataggacc | ttcctttgga  | ccggaaccac | 34897967 |
| cactaagtgg  | aacaaatagg  | gaagcactgg | cctccaggag  | ctggcagcga | 34898017 |
| cagagcccaa  | ggaacacagt  | gttcccgtgc | cttggtagag  | ggacactgta | 34898067 |
| ggaacagctg  | tatctgagaa  | ccaaggaata | gggaagcagt  | taaaatgcac | 34898117 |
| aggaggaatt  | agggtgcaggc | tggagtgggg | cagtgggccg  | ctaaggtttt | 34898167 |
| gtttagaata  | ttgacatggg  | tctgggggtg | ctgaaccaga  | tcagacgtga | 34898217 |
| ctcccaagcc  | aaagcctaac  | cattgctggc | atctcctatc  | tggactggac | 34898267 |
| caccaatggg  | catctctgct  | cctttatggc | taagatatac  | cactttggag | 34898317 |
| tttaggcccc  | tgtgactatt  | gtccaagcag | ctggagagga  | gaaaaggagg | 34898367 |
| tttagaataa  | atatgagagg  | ccgtggatgg | ggggaaccgga | gaacacggac | 34898417 |
| cagcaatcag  | accatctggg  | tccatgttct | gaccacctct  | actgggctga | 34898467 |
| gtgggggaagt | gacttcactt  | ccctgcacct | acctcccttt  | tgtcctgagt | 34898517 |
| ggcaccgcat  | tgtccctatc  | tcctagtatt | aatgagaatg  | taaagctatg | 34898567 |
| aaaatccttt  | aaaggacaaa  | ggaactacc  | aatagagaga  | gaaatccctg | 34898617 |
| tgaagttggc  | aacaaagaac  | attagacaca | gcgaatgtca  | gtgtcaccgt | 34898667 |
| ctacctgagg  | tactgagca   | caagtcacaa | tccctacctt  | gcaggactag | 34898717 |
| cttgctagag  | acgtgggcct  | gtgaaagcac | cactcagga   | caggtacttt | 34898767 |
| aatggcctct  | tccccacccc  | caactctagg | tatttaagg   | gggtttattg | 34898817 |
| cttgttggct  | ttcttggtgt  | gtctgttaca | caaacaagg   | cagggcctgc | 34898867 |
| ccagctctgt  | gatacactgt  | caactgacct | ccctctgtct  | tctggtttca | 34898917 |
| gAGAACGCTG  | GGTCTCTGAA  | GGTCCTCTTT | GGGACCCCG   | AGTTTGTGGC | 34898967 |

|            |            |            |             |             |          |
|------------|------------|------------|-------------|-------------|----------|
| TCCTGAAGTG | ATCAACTATG | AGCCCATcgG | cTACGCCACA  | GACATGTGGA  | 34899017 |
| GCATCGGGGT | CATCTGCTAT | ATTCTgtgag | tcccaaggct  | cttgctgggg  | 34899067 |
| tggggagaca | gtgaagggga | ggccagcgtg | agccatggga  | gaccacatgc  | 34899117 |
| tccaagcagg | agggccatag | gttgccggtc | ccattcccac  | ctctaccagc  | 34899167 |
| ccatcctgct | cctgggctcc | tggtagtgta | gttccctgca  | ccaccctctg  | 34899217 |
| tagccacatc | tagtgccaca | cacaaagatc | tccccacctg  | ggtgcaatac  | 34899267 |
| tgtccctagt | gctggccacc | tgggggcttt | ggtcagggtc  | atgagggtgag | 34899317 |
| agggaaacca | gatgggatgc | tgtgcctctt | caccgtcttc  | tgaagagaga  | 34899367 |
| ggcccatcct | cccaggggtg | acaccacagt | ccctccacgt  | ctctcactcc  | 34899417 |
| agtacatgta | ctgattaata | ggcactttta | atgggaacaa  | cagacaacag  | 34899467 |
| aatcaatac  | agtaatcaga | gttagcaatg | ctggagggaa  | ggaggagaag  | 34899517 |
| ccaacagtat | acaccagtgc | ttggcaacct | gtaatatacc  | tgaatctctg  | 34899567 |
| tggcaatgcc | tgagacactc | cacttataac | aggaccaggg  | cgcccatagt  | 34899617 |
| gtttgtccaa | ggttacattt | ggagtaactg | acctccatgt  | gccttttgtt  | 34899667 |
| gggttgtgct | gaagcttagg | gccacagtca | ctaaagcctt  | agaaacagcc  | 34899717 |
| cttgaccttg | tgtgccaccg | tgcagggtg  | gaatgagttc  | ctaaagctgt  | 34899767 |
| ggcgtacatt | taattgttaa | aaatattggt | gtcaggatta  | taactcagtc  | 34899817 |
| aggaaagtgc | ttgccagta  | tgcattgggt | agtaggctca  | gtcttcattg  | 34899867 |
| ttgcataaaa | acatccaggt | acggtggaac | atatttcagt  | cccagcacat  | 34899917 |
| gagagatgga | gacaggagaa | taagaagttc | aaagctacat  | agccatcctg  | 34899967 |
| gactgcatga | aaccctgttt | caaaatatat | gcatatgtat  | atgtgtatta  | 34900017 |
| agacaaagg  | aaaattaagt | attttgcata | gaaaattaaa  | gaaggctgga  | 34900067 |
| gagatggttc | agtggttagg | aacatttact | atttttgcaa  | aggaccatg   | 34900117 |
| ttctgtttct | accccgcacc | cctaatcagg | cagctcacag  | ctgcctacaa  | 34900167 |
| ctccagttct | gggggatcca | aagccacctt | ctagttctga  | cgagtgcctg  | 34900217 |
| cacacatatg | gtacactcgt | gttcatgcag | gtacatgtgt  | atacaaacac  | 34900267 |
| acatacatat | cttttttttt | aaatgaattt | aaggaggctc  | tcaaagaaag  | 34900317 |
| caatctaaga | catttgggat | cttcggcccc | cagggtgaaa  | gatgactcct  | 34900367 |
| agtatccagt | tgatttacga | agcactatta | gaaaagcttt  | ggtgtggtgg  | 34900417 |
| gactttctaa | gtcctcagag | tacctgtgag | gacagcctcg  | ttcacttaga  | 34900467 |
| cctgtgctat | atatagcatt | tgtaccacag | agtccttgcc  | ttccctgtct  | 34900517 |
| agcgtcacc  | ccctccaggc | cagagtagaa | cccatgcatt  | tctctgcctt  | 34900567 |
| ccctgtgct  | ctctaggagg | agctactagt | gactaaggac  | tctgcatgct  | 34900617 |
| ttcttcatgt | tcttggttaa | gtgaagagca | gagagccctg  | agctcggcct  | 34900667 |
| ctctctcctg | tagcttctgg | gccaacctga | gctcattttg  | atctcgggcc  | 34900717 |
| ctagtgaaac | atggagcccc | gtagaagctc | catttgggtca | gctcactctg  | 34900767 |
| gccagacccc | actggtgccg | ctttggctta | gcttgcgccc  | agtacttgca  | 34900817 |
| gcaagcattg | ctgactgtgg | gaggcatggg | gatcagctga  | tctactgctt  | 34900867 |
| tcacagaggt | gggtctgatc | tcagcacaaa | gtcagagtgg  | gaggtagcag  | 34900917 |
| gggtttgatc | gtattggaca | tcaaagtgca | cggtgccgcg  | gaagccactt  | 34900967 |
| accatggtct | gggcacctga | ccaagtgttc | cattttgccc  | agaataaata  | 34901017 |
| gtttcctagg | gtacaggact | ttgagcacia | aaatggggat  | ggtcccagac  | 34901067 |
| aaaccaggat | gaatcgcagc | tgtaacagga | ctgcttggtg  | aatggtgaca  | 34901117 |
| atgtgcacat | tcctgtgtcc | cacactgaat | cagagaaaca  | aatccaacca  | 34901167 |
| ggatcctgta | gaccttgggt | cctctcctgc | tcactgtcca  | gggagacagc  | 34901217 |
| accatccggt | cttctgaagt | taggggtcgg | gtcagttcgg  | tccgttcctg  | 34901267 |
| gacttcatga | aaggaccag  | aaggaagtga | ctggcttcgt  | ttagtcaatg  | 34901317 |
| ctgccagtct | aattcact   | gttacacacc | actgtggatg  | gctcattatc  | 34901367 |

|            |             |             |             |             |          |
|------------|-------------|-------------|-------------|-------------|----------|
| caagctctgc | agcatgccac  | tgtgtggaca  | taatccagtg  | tactaaagga  | 34901417 |
| ccttaggtag | cgttcagttt  | gtaatgttac  | agccttctgg  | cacatgcggt  | 34901467 |
| ttttttttt  | tagagagaat  | gctgtgtggt  | ttccactgga  | aatgttatct  | 34901517 |
| ggaatttggc | ttgctgggct  | aggagagcac  | tgtgttttaa  | aataacaatt  | 34901567 |
| attgtagata | ttatcttaca  | cacacattgc  | ttactagatt  | gctttttaaag | 34901617 |
| tgaaaacgaa | gaaataagga  | cttgaaaaaa  | aatggaaga   | taaccttgtg  | 34901667 |
| tcaggagtaa | agagagggat  | gagagggagg  | cagcaagtgt  | gcttcaccca  | 34901717 |
| gctcagtgtc | ctgatggctg  | ccccctttgc  | tgtggcagtt  | ctttggactg  | 34901767 |
| ttccataagg | gctgatccaa  | atctgggagg  | ccctctttgg  | agctaggttc  | 34901817 |
| tctcagcaga | acacaggatc  | ctaaaaacag  | aaactgaagc  | ctacaaaatg  | 34901867 |
| atggcttcct | ttaagccctg  | atgtacagaa  | ctgaatgaag  | ctgccgctgg  | 34901917 |
| aagaggccct | caagtgcccc  | gtggcacctc  | ttcagtgtctg | ggtcatctgt  | 34901967 |
| ctaacagttc | ctgctctggc  | ctcttcacc   | tctgttgaga  | aagctctcct  | 34902017 |
| gatcaccggt | caagaacagt  | gagtgtgtct  | ggacatcact  | ggcaccgcat  | 34902067 |
| ggcagtgtag | gggtatccaa  | cctcgttgtg  | ggaactggaa  | ttctgggaaa  | 34902117 |
| atccagctca | ggaattaggg  | cagttcctat  | ctttgcacag  | aaacaatggc  | 34902167 |
| atctctgaga | tgattctcct  | gaagggaggg  | attccttggc  | tctccttctg  | 34902217 |
| ccatactctt | gaggagagcc  | actcgtatct  | gagcatctca  | accctgttcc  | 34902267 |
| ttcatccctg | cccttctgac  | ctgtggctct  | catcttcctg  | tcagccacac  | 34902317 |
| ctccctcca  | cttcagctcc  | ttgtgaagta  | cttgccacac  | tccaaagagc  | 34902367 |
| caggggccct | cccctaacac  | tgtatacaag  | tcaggaaaaat | gcccctgagg  | 34902417 |
| gaagaggagt | gtgaggctgt  | agcctctgtc  | tacactgtctg | ggactggact  | 34902467 |
| gcccttatct | ctgctgagcc  | cagggatcca  | tctgattccc  | tgctctctctg | 34902517 |
| atcccttgcc | aatccagcc   | actatcttca  | ggttttgctt  | cccagaaact  | 34902567 |
| ccacagttaa | atccccagtt  | tagtcctctg  | ttcttcccat  | gtgtctgtctc | 34902617 |
| tttcaaattg | tccactgggg  | attctttaag  | attgaaatgg  | gataaaacct  | 34902667 |
| aaacccttct | gaagcactgg  | cagggcatgtg | gccccttaac  | taccactggt  | 34902717 |
| gccagatcac | gtctgtgact  | ttaaagacag  | tgatggagca  | agcgtagtcc  | 34902767 |
| aagggacatt | tccacactct  | ctactctcct  | gacatcacac  | cctgagggaa  | 34902817 |
| gagcaggctc | cagcccacgg  | gttgctagca  | gggttcactg  | tggggaaact  | 34902867 |
| aagggttaat | tgatgccaga  | catgggtgtca | ttaatccac   | cacataggag  | 34902917 |
| gcaggcagat | cacctatggt  | tgagtttgtg  | gctagcctgg  | tctacagagc  | 34902967 |
| aggttccagg | acagccaggg  | ctaccagac   | agaccgtgtc  | ctgaaaaata  | 34903017 |
| aaagaaacaa | aagcaaaaaa  | attaagccat  | tagtttgccc  | aagagttggc  | 34903067 |
| tcagcagtta | agagcacttg  | ctgttcttgc  | agaagacctg  | gttcccagga  | 34903117 |
| cgtaggtggc | agctcacaac  | cctctgtaac  | tccaattcca  | gggtttctga  | 34903167 |
| caccctctcc | tagccccctt  | cagggaccag  | gcacacatgt  | gtcacaaga   | 34903217 |
| catgtatgca | ggccctcata  | tacataaaaac | aagtgagaat  | taaacagccg  | 34903267 |
| gggccgggga | tccagcagac  | tgaaagaagc  | ctgctttagc  | cgggcatggt  | 34903317 |
| ggcccacgcc | tttaatccca  | gcacttggga  | ggcagaggca  | ggcagacctc  | 34903367 |
| tgagttcgag | gccagcctgg  | tctacagagt  | gagttccagg  | acagccaggg  | 34903417 |
| ctacacagag | aaaccctgtc  | tcaaaaaaaaa | aaaaaaaaaaa | aaaacaaaaa  | 34903467 |
| acaaaaaaca | aaaaaaaaaac | aaagcaaaaca | aacaaacaaa  | agagcaagaa  | 34903517 |
| gcctgctata | gcactcatta  | gccccagtt   | ggatgccgag  | cacagttaga  | 34903567 |
| acaccctcaa | gtgtaagttt  | cacaactcag  | acttgagaat  | gaatgtcaag  | 34903617 |
| aatccacatc | cgtgagagag  | aaaccaagta  | tccaagaact  | tgcccagaca  | 34903667 |
| gatagcgatt | ttatgaagac  | gggtaagtcc  | tttgatttaa  | aacaagatgt  | 34903717 |
| aacactgggg | ttgggaatgc  | cctatagcat  | tagtgtgttt  | gctaacaggt  | 34903767 |

|             |            |             |            |             |          |
|-------------|------------|-------------|------------|-------------|----------|
| taatagtttg  | gttttttccc | cctaataataa | aaacacacat | gaccctatat  | 34903817 |
| atatattcta  | gcaataaagt | cctaaataga  | aaaaaataga | aacttcaa    | 34903867 |
| taagcatagc  | tctatacacc | attccagcat  | ctgtaaattt | gaagcaggaa  | 34903917 |
| gatcatgagt  | tggaggccag | cctgcactac  | actacctact | gaagcagaaa  | 34903967 |
| tataatcagt  | aacactaatt | ctaccttata  | catcgtgctc | tatgtaccag  | 34904017 |
| tattgtaagt  | ttcgaattcc | aggggaactt  | gggtaagagg | ggacttgggc  | 34904067 |
| aagacagagt  | gtttcagagg | gatgtgctgc  | caggcaggag | cacggccaag  | 34904117 |
| gccagaggct  | ggggctccct | gtgcctgcac  | cgtggacagc | gattaagacc  | 34904167 |
| tatctctgca  | ggattccaag | tcctaattag  | gaaaggaggc | atgcagaagg  | 34904217 |
| ggccctctct  | gcattcctca | gcaccgctgt  | ttgttcttct | tgctgtcttt  | 34904267 |
| ttggagcacc  | aaaggacttt | gcccctcctt  | gcttcaaaca | gaatatgtaa  | 34904317 |
| aggcaagcaa  | aagcaggcgc | tcacaagcaa  | tgacaggctg | catcttgggtg | 34904367 |
| gagcctgctt  | tagccataca | catcacacgg  | aggtggaggg | agctgaggtc  | 34904417 |
| cccaggcaac  | ccaccccagt | caccatggta  | tcaaaatgga | gtagcacatg  | 34904467 |
| acagtatgaa  | ctcaaggacc | ggtaacctct  | tactcacacc | ctcttggata  | 34904517 |
| catgaccaga  | aatgatttag | attgccctca  | tgactttaag | tcagcatctt  | 34904567 |
| gcctaagaaa  | agctatctgc | aataggtcag  | tgttactcaa | agccacaagt  | 34904617 |
| atattaacta  | gagtgagaaa | atccacaccc  | accagctctc | tattcagcag  | 34904667 |
| agggtttctc  | ccatggccag | ccttctccca  | gtgcttcaag | tgggtgttgt  | 34904717 |
| tcaagcacag  | tgttccggta | cacgcagatt  | tcatgagctg | aggtcttttg  | 34904767 |
| aatgctgagc  | agctccagca | gctgtcagtg  | cattgttgtt | tatgatgggtg | 34904817 |
| gattaataag  | gatttggaag | aaggatgttt  | ataaaacctt | gacttaagag  | 34904867 |
| ggccctagat  | atatttcatg | tggttcagac  | agggtcagaa | gagggctaag  | 34904917 |
| tataactttt  | tcagactgaa | gaggcggggc  | tatttgttga | agcattgtta  | 34904967 |
| acaacttcaa  | gatggtggca | atagagcatg  | aatgctagac | ttgaggttca  | 34905017 |
| tctcaggatg  | ggattccagg | tggtctgtgca | ggtcgacatg | caaggtgagg  | 34905067 |
| ggatggctgg  | cttgcagaag | aggtgcatag  | aggtcacaag | tgagcacagt  | 34905117 |
| gtgttctggg  | tgactttgag | gtcgctgcct  | tccacattgt | gtttgacttg  | 34905167 |
| ggctatgggg  | agatggtaga | ggttatctag  | acctgtagga | tatacatggc  | 34905217 |
| gccaaatgag  | ccctgatgtg | aactgcccag  | tggggccagt | tgatgcatgc  | 34905267 |
| agctccttaa  | tctgcatgga | aatacgagca  | tgcagcagca | gtcaaggggtg | 34905317 |
| ggccggggga  | cccaggcacc | aagttgcaca  | gctcaatgtc | tgggaaatcta | 34905367 |
| tgggcaggct  | acctagcaaa | ttctgggcct  | cacttgccat | tgctatataa  | 34905417 |
| tgaaggagtg  | aagattacct | gtgttccggg  | gcaatgtgaa | gattaaatgg  | 34905467 |
| gttcatctat  | ttcagatctt | tacactgcag  | gtggtaacgt | gtgctcagtg  | 34905517 |
| cctactgctg  | atgaagaggg | ggcagggacc  | acagagttga | gagactattt  | 34905567 |
| tagagcacia  | agaaaaagtg | gtctagaaag  | tagggataat | gcccagggtc  | 34905617 |
| agtctctcag  | ctagcaaagt | ggctgcactc  | tgctctctgc | catgtagcct  | 34905667 |
| gtgttccagt  | gtgacataaa | tgccataggc  | agcccacatc | tcctcaccga  | 34905717 |
| ctgaaagccc  | tcatgcttat | tgagctaata  | tttgatgagc | catccttgta  | 34905767 |
| tgggtgcctcc | cccaaccccc | tgaggttata  | aagcaggaga | ctagaaaaga  | 34905817 |
| gtatatatac  | tagatgggag | gaagggaccc  | actaaagggg | ctataaggag  | 34905867 |
| tgagggccaa  | cctgagatca | ggatagaaga  | gggggagaga | ggggtttctc  | 34905917 |
| aggtcaatct  | cccacatcaa | cctcacaggt  | gattgatata | aagggtgggg  | 34905967 |
| gtacccttag  | gtgcaatgag | tgactgagga  | gagatacaga | agccctgtgg  | 34906017 |
| atttcctctt  | ccaagaggaa | gaggaaaggc  | aggtgagaga | gcatctgggt  | 34906067 |
| gtatgcttgg  | agtgcagggc | cgagcctcac  | ctttgacctc | tgactctat   | 34906117 |
| tagaggagtc  | ctgccccacc | cctcccagcc  | cagccccact | tcattactgc  | 34906167 |

|             |             |             |            |             |          |
|-------------|-------------|-------------|------------|-------------|----------|
| tctccttctc  | ttctccccag  | GGTCAGcGGA  | CTTTCTCCCT | TCATGGGTGA  | 34906217 |
| CAATGATAAC  | GAGACCTTAG  | CCAACGTCAC  | TTCAGCCACC | TGGGACTTCG  | 34906267 |
| ATGACGAGGc  | aTTCGATGAG  | ATCTCCGATG  | ACGCAAAGGA | TTTCATCAGT  | 34906317 |
| AACTTGCTGA  | AGAAAGATAT  | GAAgtaataa  | gcagggatgg | cagtctcgtc  | 34906367 |
| agcctctggc  | tagtcctggg  | gcgcagggcc  | ttcctgtatc | tgtgaagctc  | 34906417 |
| ccccttctg   | gtcttacacc  | agtccctgtgt | tccctgaaga | ggaaggagtg  | 34906467 |
| tccagtgagg  | actcagccag  | tggttgtgtg  | gagcagttcc | tgcttcctgg  | 34906517 |
| cacaaggcat  | tccataccac  | caccaccacc  | cccgcacccc | ccccacacac  | 34906567 |
| acatacactt  | tagaaacata  | gaaaccctac  | tggattgttg | accctgagc   | 34906617 |
| gaggaagggt  | cttgggaagc  | aacagctttt  | ctgtggtggt | tggcctttta  | 34906667 |
| tagtctgttt  | ggctgtggcc  | ctcagagtcc  | tgtagactcc | acaggccctc  | 34906717 |
| ttcacagtga  | gggtggggga  | acgcctgcct  | aacttgcaaa | cgcagataac  | 34906767 |
| aaaaatcgtt  | aacaacccat  | tggagggggc  | tctttatatc | ccctgattat  | 34906817 |
| tctggcttgg  | tgcttcattc  | actttgaaat  | cattccttag | atatggccca  | 34906867 |
| gtttcttcta  | acacacaaca  | cattggtgag  | caatggatgc | tgggatgcct  | 34906917 |
| ctgcctttga  | tggcaagctg  | tgaagaacgg  | tgaacaaaac | agccttttagc | 34906967 |
| gtagttggag  | tgaggctagg  | tggaagagct  | gggcaggggt | tacgtggctt  | 34907017 |
| gttggctctat | ctctccaggt  | gagtggagtc  | agctaaacta | aagcaggaag  | 34907067 |
| gtaagaggct  | ttgctgctcc  | tcaggagaga  | tataccatga | tagggagctc  | 34907117 |
| tagggatcca  | ttctaaaaat  | gagcatccag  | cggcagagcc | tgttcccagt  | 34907167 |
| accccaactc  | tacccccagc  | tctgagtggt  | atctgacaat | aggggatagt  | 34907217 |
| tggggccata  | ccaagaaggg  | tggtgttgac  | ataggtagtg | tggctggagc  | 34907267 |
| aggcgagag   | cagccacctc  | tagggatagg  | caagaagtgt | agagctagca  | 34907317 |
| ggtgatttca  | caacctggtt  | tctactggtc  | cacctggttt | gtggctctct  | 34907367 |
| gggctgtagc  | tagctacctc  | ccactctggg  | aatacagagg | ggttgctacg  | 34907417 |
| gaagggaggc  | tcttgacagaa | cctcttagat  | ggctgcatct | atgtctccag  | 34907467 |
| atacccatth  | atcagaatcc  | tcttgagcct  | cgcagacttg | gactccccag  | 34907517 |
| gtgatattca  | cacttcctca  | caatgcagtc  | cctgcctctt | agtggccaca  | 34907567 |
| gttgtgtcag  | aagtcacctc  | gacccaaaaa  | agaatctgga | tgtcgtggga  | 34907617 |
| gtttggattt  | ccttccaagg  | tgaagggtcc  | tactcccaag | atagatagct  | 34907667 |
| cccttccgat  | aactttggcc  | caaggatggc  | ttttgtaaag | gaaacttcat  | 34907717 |
| tcacacattt  | gatagatgag  | gcattgtatg  | gtgcctcatt | ttctcatctg  | 34907767 |
| ctcttaaaat  | gacttagcaa  | cagactgtat  | tgggcttctc | tgatcataaa  | 34907817 |
| atgggctcac  | caaagagcca  | gcttcatcaa  | atagaataaa | acgttacatt  | 34907867 |
| cttttaaatc  | cttaaaaacc  | agcgtatcta  | tcttccacca | aagaccactt  | 34907917 |
| tctgtctttt  | tttaaatgtc  | tggtataaat  | ttatacatgc | aaaatataga  | 34907967 |
| cattaaaagg  | atgtaagtca  | acttaagaca  | tcatgacccc | gttctctaaa  | 34908017 |
| agtcctcccc  | actgagacat  | gcttctctct  | agtcactttc | cctctgtggt  | 34908067 |
| agcatgtagt  | cctttggact  | cagtcatgta  | gcaagtaaag | tgatgccctt  | 34908117 |
| gaaatgttcc  | cagattccag  | aagctctcag  | aaagatgaaa | tgtagtctct  | 34908167 |
| aggctgctgt  | agcttgagag  | ttgcgtgtag  | gacacacctc | tttggattgt  | 34908217 |
| gacaggaaac  | tctgatactc  | agccacagta  | taatacatga | acattcagag  | 34908267 |
| attcttgacg  | gtttgtctta  | gtgttccact  | ctcatcacta | ttttaggaga  | 34908317 |
| caaaggggtc  | aggcccgcac  | gtggccagca  | gaagggcaga | cctccctgga  | 34908367 |
| atatggtgct  | gggcttgtct  | gccttataac  | cctgacgctc | ttggaccaca  | 34908417 |
| aaggttgaga  | atctgctggt  | ggttgggctg  | ggtccagtca | gtgcaatcag  | 34908467 |
| accaaattggg | aaaaagggca  | agtacacagt  | gccctgggtc | atgggtgtgtg | 34908517 |
| agccaagcag  | acctggggtg  | tgtcccatgt  | aacctgggac | agatgtcatc  | 34908567 |

|            |            |            |            |            |          |
|------------|------------|------------|------------|------------|----------|
| ccatttgtca | tctctgaggt | ccccacctgc | tcagaaatcc | tctgatctct | 34908617 |
| gcctccatca | gAAACCGTCT | GGACTgcACC | CAgtGCCTTC | AGCACCCATG | 34908667 |
| GCTGATGAAA | GACACCAAGA | ACATGGAGGC | CAAGAAGCTG | TCCAAGGACC | 34908717 |
| GGATGAAGAA | ATACATGGCA | AGAAGGAAGT | GGCAGgtaat | gtggactcag | 34908767 |
| tggggtagga | tgctgctctc | agtttagcgt | cattcccgtc | caggtagccc | 34908817 |
| tagcttcact | ctaagatgct | gctcctcaga | ttagcttcgt | cccaggccat | 34908867 |
| gtgatcctgt | gatcctagct | tcactccatg | aaaggttgaa | tttgtttctg | 34908917 |
| caatgacctg | tgtccagtgg | gacaattgat | taaggtgctg | agttactaac | 34908967 |
| atccttgaac | acaagtttct | tagctcagag | gaatctcctg | acctgcttgg | 34909017 |
| ctttgtctcc | tggggatcag | aggccttgtg | cagcctcccc | tcaaccaggc | 34909067 |
| taaactgcta | gtggccatgt | cttcctggct | ttcagtgagc | accatgacct | 34909117 |
| tgaagggat  | ctagcagtcc | tggagaagct | gggacccttg | tcacatactt | 34909167 |
| ccttgtgaga | gaggaagggg | ggatgcatgc | tccaaagagg | aaataaaggt | 34909217 |
| agctttaggc | aaggaggtta | actttgctgt | ggattaatgt | tcttatgtgt | 34909267 |
| catgtgaggg | tagcactggc | acgagaaatt | gtgaaaaatc | atgagagaaa | 34909317 |
| ttttgaaggt | ctttaggaca | gtacctggga | cacagacatt | ctgcaatcct | 34909367 |
| gcctgtagct | aatatggatg | gaaggaaggc | ttgctatgaa | tcagagctga | 34909417 |
| ttcaaaggat | ttcatgtacg | tgttaggttt | tttcccattt | gctatgataa | 34909467 |
| aacaccctta | agagaaagag | gagttatggt | ggctcagggt | ttgaggcctg | 34909517 |
| gtccattgtg | gtggaaaagt | cagtgtcggg | agactggggc | cactggccac | 34909567 |
| attgtatctg | caaggatgaa | acaagtcaat | gaactgccag | cttgcttgct | 34909617 |
| ttatattcag | tctaggacce | cagcctgtgg | aacagttttg | ctcacagtga | 34909667 |
| gtggatctcc | tcaccacaat | taacctagtc | tagataatct | ctcacaggca | 34909717 |
| aatccagagg | caagccta   | ctagacagtc | cctcactagt | gtgcccagag | 34909767 |
| actggtctcc | tagatgcctc | tacatcataa | caacttgaca | ataagtatta | 34909817 |
| aacattacaa | atgtgcctgc | ccattgcttt | taaatcttac | cattgaggct | 34909867 |
| attattgtcc | tcactttaca | gacaaaccag | ggaagagagt | agatgagagg | 34909917 |
| gcatcatcca | gaattgcagg | gatcagtgga | aaagccagga | aatcatggaa | 34909967 |
| aagcatgaaa | tctggcccca | aagtatacag | cggtaacaa  | aacagaacta | 34910017 |
| actgcctcta | ataacaagat | ggtgacattg | tcatccaagc | cccagagcac | 34910067 |
| ttagcagcct | ctccatctgt | ttgactcttt | ctttcatcac | ggttggagtt | 34910117 |
| gcaaagctcc | tgggcttctg | tagaggacat | ggtttccata | ccaagagat  | 34910167 |
| gtacaattcg | gtgggaaaca | aaagcaacgt | caaacaaaag | aacgcaagca | 34910217 |
| caccaggagt | tacaaatgat | tagcagagcc | ccatgacat  | atatgtatcc | 34910267 |
| gagggtttta | ccatcgtgcc | cccgttccca | aaataacaat | tctgagactt | 34910317 |
| aattaattat | gaataaatte | ttaggcctta | agcattttct | cgtttcccaa | 34910367 |
| ctagctcata | atttagataa | tgtttgttct | aagtcctgcc | actgccacat | 34910417 |
| ggttggttac | ctctcctcag | tttcatacaa | tctgtctcct | cagagttctg | 34910467 |
| ggtgaatctc | ctccagcacc | tcactgtatc | ccagaatctg | ctttccctac | 34910517 |
| tgaaattccc | tcctccgatt | tctgcctaa  | gctaatagac | catcagcttt | 34910567 |
| ttatttgaca | ggtgatgctt | ccacacagaa | cacacaagat | tatccttaca | 34910617 |
| catatatgtg | agcatggatg | gagcaggggc | cattccacta | gagttgacag | 34910667 |
| ttataagaat | gtttaggaga | aggggctagg | aatttagtag | gggccgtagt | 34910717 |
| taaagcccag | aaggaaatgg | caggtggaaa | ctatgtaggg | atggacataa | 34910767 |
| aggcagagcc | tttacctgga | gatccagggc | tgggagactg | agactttgcc | 34910817 |
| agtgtgatgg | gagaaagggg | tccacggaac | actagtcact | cactactaca | 34910867 |
| cgtgtgacta | gccacagttt | ccttagaaaa | cacaacttaa | cacatggatt | 34910917 |
| aggagccgag | gagagaccac | aagagcctgc | agctgaaggg | cttcagggac | 34910967 |

|             |            |             |             |             |          |
|-------------|------------|-------------|-------------|-------------|----------|
| ttgtatcctg  | agcacacaac | agccagagag  | ccctgctaca  | gggaggtcag  | 34911017 |
| ttcttgcttg  | aaaggactgg | gctgatctcc  | tgactctccc  | aagtgcaagg  | 34911067 |
| taggttagaa  | cacccgtctc | tcttaccaac  | tgagccttgt  | aggtcagagt  | 34911117 |
| aggaagtaga  | cttaagtttt | tttaaggtat  | ctacaaaatc  | aaagttgcct  | 34911167 |
| ttgttagtgg  | tcctctgccc | atcagatgcc  | ggagaattct  | tctggaaaga  | 34911217 |
| caggaagaga  | agggcaacct | tcaaagaagc  | aggtctaact  | ggatcttcct  | 34911267 |
| tgcatggggc  | acttaactag | aacagccctg  | tcacctcaga  | attatctgta  | 34911317 |
| agtggctcta  | agccaggcgg | gtgctaagcc  | cagggcatgg  | gcacagagag  | 34911367 |
| gagctgtggg  | tgtgggagag | aatggttcca  | tttctgcagc  | cagggaaacca | 34911417 |
| cacctcacag  | ctcagccctt | atctccgggt  | ttgcccttta  | ctggccatag  | 34911467 |
| gcttttctag  | aagggtgagg | atcaaattta  | gaaaaagaac  | ctcatttccc  | 34911517 |
| ttttctaatt  | taagtgaaaa | catttgghaa  | tgacttttct  | gcaaaattgc  | 34911567 |
| acacaaatta  | gaccacaaaa | atctcactca  | acatgtcccc  | gggcttaatt  | 34911617 |
| tcactgagta  | cagttcagct | gtgctgacct  | gctgttaagt  | tgcttcctta  | 34911667 |
| gggaaatcct  | ttccatattt | aaactccaat  | tccagaacct  | tggctcccc   | 34911717 |
| agaaataggg  | ggctctgtct | cagagcagcc  | aagggaatgt  | gcagcaggac  | 34911767 |
| agagaggact  | agagtgggct | atccaggggg  | agagagcatg  | aggcacatgt  | 34911817 |
| gtccatgcc   | actccagaag | gaaccttgta  | acaactcccc  | tattctgata  | 34911867 |
| aaaggctccc  | aaaacagggg | attaacctgg  | taacaaatct  | ctccttgag   | 34911917 |
| gactaagtgg  | ggcacaggta | tctaatacata | ccattgggtct | ttgggtaaag  | 34911967 |
| ttctgaaaga  | aggcgtgttt | tcagttcata  | ctgaaagcct  | agtgccaaagc | 34912017 |
| tatgtatgtg  | aagtgtagca | attgggggtga | gtttgggagg  | atagcagggc  | 34912067 |
| ttctgtctgc  | taactagatg | taaaaggctg  | ggcgtgggag  | tgggagtaga  | 34912117 |
| aagaagagtg  | ggaattaaca | gcctaaagtt  | agatgcattt  | atcttctaga  | 34912167 |
| aactgcagag  | accccagaaa | tgtgtataaa  | aataaagggg  | aaaaatatta  | 34912217 |
| gagtctgctc  | tatattttta | tatagataca  | tgaatacaga  | gtgctctata  | 34912267 |
| ttttaatata  | gaaataatac | agactgctta  | tatttttaata | tagaaatata  | 34912317 |
| aatatagaca  | tctctttttt | tgttttggtt  | tgttttggtt  | tttgagacag  | 34912367 |
| ggtttctctg  | tatagccctg | gctgtcctgg  | aactcaattt  | gtagaccatg  | 34912417 |
| ctagcctcga  | actcagaaat | ccacctgcct  | ctgccttcca  | agtgctggga  | 34912467 |
| ttaaaggcgt  | gcaccaccac | tcccagttaa  | atatagacaa  | ctcttggcca  | 34912517 |
| tcatataact  | gtcagaggcc | ctgtcatcct  | caggctgttt  | taaagatggt  | 34912567 |
| tacaggctag  | tgcttgggtg | accagtttgc  | ctaagtttac  | cggacatcgt  | 34912617 |
| ttgccattag  | cactgaaaga | ccctaatacct | gggagatgaa  | cagtgggtgcg | 34912667 |
| ccacctgtcc  | ttgtcatcct | agctggctct  | ccaagagcta  | gggaattggg  | 34912717 |
| actatgttctg | ggaggcctag | acagactttg  | cctgccaaaga | tcacagcctt  | 34912767 |
| agccaacctt  | gtcctccaac | aaagaaagca  | ggcctcttga  | aacaggctca  | 34912817 |
| agaactgaaa  | cttggctctg | atggtttttg  | ttccaaaatt  | tccaaaggctc | 34912867 |
| tctgtgaagc  | cacaatcagg | tttcagctca  | gggacatgca  | agttgactgg  | 34912917 |
| acagtgccaa  | catcctttct | gttggtttcc  | agaaagcact  | ttccaaagaa  | 34912967 |
| tgaattctgg  | tgctgacctt | tttttttctt  | ccttactaag  | ctcttgcaaa  | 34913017 |
| tactcccact  | taagaaatta | agtgaacgtc  | tctgtctgct  | gggagtttgt  | 34913067 |
| ccacatgaca  | gtgtctgtgc | ctaagtgtgt  | tgctactcca  | tctgaaacac  | 34913117 |
| tggacctttt  | gtttgcctct | ttctgataag  | ctcatattgg  | taacattagt  | 34913167 |
| tacaaaataa  | aaccaagaaa | gaagaaaggc  | atcatctctc  | cacagcgtgc  | 34913217 |
| agtgaataca  | atcccaacaa | accccactct  | acctgtctgg  | aaccagagtc  | 34913267 |
| ggtgggctca  | gggcggaggg | ctgggggtgct | gctaccctac  | ccattcctga  | 34913317 |
| gcaggaataa  | gaaatccttt | gggaaaacta  | gagctacaag  | aagagtacaa  | 34913367 |



|            |            |            |             |             |          |
|------------|------------|------------|-------------|-------------|----------|
| atactgattc | tattgaaaat | ctggacacca | gtcctcagag  | aaggaagagc  | 34913417 |
| taacttggac | aaggtcatag | agcaatgagt | ggtcggagaa  | ctggccttgc  | 34913467 |
| tgggaggaac | cctctggggt | caacactgag | cccagaacaa  | accagtgtgt  | 34913517 |
| gagaagggag | ggatcagctg | attggggagt | gagctgctat  | gatcttgact  | 34913567 |
| ccactgagac | gggcgccacc | ttatatcagt | tcccaggaca  | aggtaggtcc  | 34913617 |
| ccgtgagaac | aggtggattt | ctcacactgc | gacctacaaa  | gccatcagcc  | 34913667 |
| agaccaccgg | gggtgcctga | ggactttccc | tctgctgggc  | cagtaccttg  | 34913717 |
| tctcttcacc | ctaccggga  | accctggggt | ctgttcactg  | tggtagcaga  | 34913767 |
| gagccaggaa | cataccaca  | ctctaccatg | ctgtgtgcag  | gaggatattg  | 34913817 |
| atggccagat | atcagagcca | gtttgattgt | ttgtccaaag  | tgaataaaaa  | 34913867 |
| taggttctaa | caaggagggc | agagtgcaga | ctggaaatgc  | agctacgatt  | 34913917 |
| gcaacagcag | gtctctgctg | aaaattccaa | gcagtcagaa  | ttgtgaggct  | 34913967 |
| tactgaaat  | gtctgagtat | gtaaaattaa | tccaggaaga  | aagcggtttt  | 34914017 |
| gctagcagaa | tgtgcggtcc | acacaggaaa | ggcaacatat  | gggaacacag  | 34914067 |
| aactttcaca | gtacgtagat | gttatatggc | agatccttat  | actggtcagc  | 34914117 |
| aaaagtttca | ccctctccta | agtggcccat | ttttgggtgt  | ttgtctcagg  | 34914167 |
| caccagcatg | gaccctgggg | aggaacagct | ccactgggca  | accataaact  | 34914217 |
| ggcgtgggg  | ccagcctggg | tttcccctca | aatctctgaa  | gtatctcaat  | 34914267 |
| cataaacaga | actaaatggg | accttggaga | ccatcctgcc  | tgacccttc   | 34914317 |
| ttagacacag | aaggaaactg | aagcctggag | aggtcaagtg  | gcttgcccaa  | 34914367 |
| gatcaataat | acgaacactg | cttcattttc | ctggaccctg  | ggggtctgta  | 34914417 |
| gtaactgtct | ctttgaccac | ttgaaatcct | attgcaggca  | ttgttttatg  | 34914467 |
| aggaacagcc | ccactgggcc | cagtcagcaa | taagtctttg  | gagctgtctc  | 34914517 |
| aggctgcagt | tgctttatat | aaactatccc | ttttatggga  | gttgaagcac  | 34914567 |
| agtatgaaaa | gagtttttgt | ctcatgttga | ccttgtttag  | tcacattaac  | 34914617 |
| tcgcacatca | gttcagaac  | ccattccatt | ctccgaacat  | cttcggacac  | 34914667 |
| gctgacagtg | tgaggagaga | gaggctgggc | tactccaaa   | ggccctgcat  | 34914717 |
| ccagtggctg | cttctcccag | cctgggctct | tcatctctga  | tcagaacttg  | 34914767 |
| caaactggaa | ccagggacac | cgcctgagtc | caacctccgt  | atctcttttc  | 34914817 |
| cagAAAACGG | GCAATGCTGT | GAGAGCCATC | GGGAGACTGT  | CCTCTATGGC  | 34914867 |
| AATGATCTCA | GGGCTCAGTG | GCAGGAAATC | TTCAACAGGG  | TCACCAACCA  | 34914917 |
| GCCCAATCAA | TGCGGAGAAA | CTAGAGTCTG | AAGgtaaggc  | ttttcccagg  | 34914967 |
| cactcgtgag | aggggaagag | ttgcgagtag | aggaacattt  | atgctctaca  | 34915017 |
| gtgataaatt | cagaaagact | ttttgggttt | ccctgacaac  | tattaactct  | 34915067 |
| ggtaattatt | ctttaattgt | taactatttt | cagagcaaag  | gctattatatt | 34915117 |
| gtttgctaga | accagattat | cggcttcttt | tgcctaaatt  | ttgtggaaga  | 34915167 |
| cttaaggaag | cctttattaa | gatctttctt | tctttttttt  | ctttattata  | 34915217 |
| aaggagattt | ttttgtatac | cgatagacaa | gaataaataa  | aataaaatca  | 34915267 |
| catatggtta | cataacattt | taaaaatacc | cttccaactt  | ctgctgcctt  | 34915317 |
| atgtttttgt | tttaaagaaa | aattaacttg | tacagggcag  | attccatgac  | 34915367 |
| agcatttata | cagctgaaat | atgtgaaatc | tgtgtggcct  | ggacagactg  | 34915417 |
| gtcagtaggc | ccctcctggg | actgatgtgg | ctccttgccg  | ccacatgcaa  | 34915467 |
| aatgctacct | cggccatctc | cgcagcgaag | gccttggcct  | ttggtgtttt  | 34915517 |
| agacagacat | gtgaagacce | tcatcttctc | gaggcagacg  | cccctcatgc  | 34915567 |
| ccattgtgaa | gatgatttgg | tacctccggg | tggggaagtg  | agtctagaag  | 34915617 |
| tgctttgtgc | acaaggtagg | gtcgttggct | gttctagagc  | attctctcag  | 34915667 |
| ctcccaacag | tctgcagtgc | ctctgctgct | cctccagggtg | tgccagaaat  | 34915717 |
| tgtctgaagg | gacaggaggg | gacgcaaaac | ctcctccggg  | gcttggtttt  | 34915767 |

**E29  
(Tel  
E1)**

|             |             |             |             |            |          |
|-------------|-------------|-------------|-------------|------------|----------|
| tcctggacg   | tatcccacat  | cctgggtctgg | agctgggtac  | cttgaacgct | 34915817 |
| atataggtac  | ggaaaagcca  | ctctggccag  | ttccgggtgt  | cgtggagctt | 34915867 |
| tctcgggagc  | tggtgataga  | cctgccgcaa  | cagaaggcca  | ggcaccaaga | 34915917 |
| tcagaaaagg  | agtagcttct  | gtcctcacac  | cctcaaccga  | atcctgaagt | 34915967 |
| ccgagaagtt  | cagccaaaaa  | atcctttttc  | aagatgactt  | tctttttcag | 34916017 |
| tgtgtcagca  | tcggggaaga  | gggaggctga  | gcagttccct  | gttttgggca | 34916067 |
| cagtgtcttc  | tgctgccaga  | aaccatttgg  | cagcaggcca  | gttcatcccc | 34916117 |
| aggagaaaga  | cgtgctatga  | ttcacttccc  | taagcagcac  | tatttgctaa | 34916167 |
| attatagaaa  | ctttaagggg  | gaggggagag  | agagagaaag  | ggagggaggg | 34916217 |
| agggaaaggaa | ggaaggaagg  | aaggaaggaa  | ggaaggaagg  | aaggaaggaa | 34916267 |
| ggaaggaagg  | aaggaaggac  | gggcagaagg  | acagaaggaa  | ggaaggacac | 34916317 |
| aaggaaggga  | gggagggagg  | gagggagggg  | gggaggaagg  | aaggaaggaa | 34916367 |
| ggaaggaagg  | aaggaaggaa  | ggaaggaagg  | aaggaaggaa  | ccttttaaac | 34916417 |
| ccagggagag  | agcaagaaat  | gaagaaacga  | cctgggtcctc | tcttggtctt | 34916467 |
| ctagACGATG  | TCTCCCAAGC  | TTTCCTGGAG  | GCTGTTGCTG  | AGgAAAAGCC | 34916517 |
| CCATGTGAAA  | CCTTATTTCT  | CTAAGACCAT  | CCGTGATCTG  | GAAGTCGTGG | 34916567 |
| AGGGAAGCGC  | TGCTAGATTT  | GACTGCAAGA  | TTGAAGgtaa  | gctctgggca | 34916617 |
| ggtcttcct   | tactccacat  | gggggtggct  | gcacatggca  | gcctggctaa | 34916667 |
| gaggtcaagc  | ttgtactgcc  | tgaagtgaga  | ggaatagcca  | aacccaaagg | 34916717 |
| gacactgggc  | ccctttacct  | ttgatcctaa  | agggccagtt  | tctgttctcc | 34916767 |
| caacctcccg  | aggctagtgc  | tggttagtga  | cttccacaca  | ggcccagttg | 34916817 |
| atacttcate  | tattcatggt  | agcctataga  | tctccattaa  | caatggactc | 34916867 |
| ccatggagct  | ccctagcaat  | gggacacatg  | taatggtctt  | tgcaagccac | 34916917 |
| tgagaacca   | tgcaaggctgc | ccataagagg  | ctctggaagg  | acggttggca | 34916967 |
| caagtcttgc  | gactggagcc  | agccagctca  | agagcttgtc  | agcaggctgt | 34917017 |
| gtgacctcgg  | gtggtgacct  | aacgctgcag  | agtgaaggcc  | tctcatttgt | 34917067 |
| taaatgatgt  | ccaacatctg  | gagtggcccc  | aggggacctg  | tgaagtcacc | 34917117 |
| tgtgtgatat  | gtgtgaaagt  | agaaacctga  | taactcctta  | aagaggtttt | 34917167 |
| agagtgaaga  | caaagaaggt  | aggttgtaag  | ggtgaggggag | agcgtgctca | 34917217 |
| ggagtgtaca  | gtgaggcaag  | ctgggatacc  | ccaaccatc   | cccacccac  | 34917267 |
| ccccacatac  | agggccaagc  | tcccagtctg  | ggctttgctc  | cttctgtaat | 34917317 |
| ctcttgtgta  | gtgtctctgc  | tccacggggc  | agtgcagcca  | catagtagtg | 34917367 |
| agtgagcaga  | acacagagac  | cttgggggat  | cttagcatgg  | gaccacgaa  | 34917417 |
| atgagcagag  | ctggggacag  | aaagtcttct  | gttccaatga  | ttacaatatt | 34917467 |
| ccaacaagat  | aagcgcagga  | tgggcgaggc  | ctctcaagca  | cagcttcaag | 34917517 |
| gctgtgctta  | cgcgagcaga  | accaacagag  | cagaggggta  | tttcccgtgg | 34917567 |
| ggctctgacc  | aagtacagca  | ttaagcagcc  | tccccaaagt  | cacacagccc | 34917617 |
| agcatggcgt  | ccagagtgag  | cgtgtctgca  | cttctgtgac  | actccccagc | 34917667 |
| accaggactc  | tcgggacctt  | ttgagtaaag  | taacttctag  | aattaggaag | 34917717 |
| ggaaggaaag  | aacaatcttt  | ctttgccttt  | ttcttttctt  | tttttctttt | 34917767 |
| ttaagtggat  | ggctttataa  | caaagaaacc  | aagagcagcc  | tatcaggaga | 34917817 |
| aggtctatca  | aagtgaggac  | gtggctcagc  | aggacataga  | gctgttgctt | 34917867 |
| gtgaggccct  | gagtccaatc  | ccctagacca  | cacaaatctc  | tatacacaca | 34917917 |
| gacactgact  | agcgtgaggg  | ttttttgggtt | ttggttttgt  | tttttttttt | 34917967 |
| ttttttgaga  | aaggtcttgt  | tgaccgcctt  | tgatcaggcc  | tagaggtagg | 34918017 |
| agagcgatta  | ggaatggtgt  | gagaacattt  | aagagagcag  | cttaaggtga | 34918067 |
| gagcatgaga  | ggcagcgtc   | aagcacagcc  | taggagtagg  | gatggcaaag | 34918117 |
| caagcggcag  | aggaaccctc  | agagcagagg  | gacattggac  | ttttacaagt | 34918167 |

|            |            |             |             |            |          |
|------------|------------|-------------|-------------|------------|----------|
| tttggggggc | tggtgggaag | ttctgtaccc  | tgtctggtct  | tgtctgcgty | 34918217 |
| acttccatgc | ctgaagccat | ttacgttagg  | atcatcagtt  | tctcctgcgc | 34918267 |
| cttcaaggag | gaggggctgc | aaggccaaag  | cacagcacia  | cttaacttgg | 34918317 |
| agtgtgtatg | tgtgtgtatc | tctgtgtgtg  | tagctgtgtg  | tgtgtgtgta | 34918367 |
| gctgtgtgtg | tagctgtgtg | tgtgtgtata  | tatctctgtg  | tgtgtagctg | 34918417 |
| tgtgtgtgtg | tatatctctg | tgtgtgtagc  | tgtgtgtgta  | gctgtgtgtg | 34918467 |
| tgtgtatctc | tgtgtgtgta | gctgtgtgta  | tatgtgtgtg  | tgtgtagcta | 34918517 |
| tgtatgtagc | tgtgtgtgtg | tgtagctgtg  | tgtgtgtgtg  | tgtgtgtagc | 34918567 |
| tgtgtgtgta | gctgtgtgtg | tgtatatatt  | tctgtgtgtg  | tagctgtgtg | 34918617 |
| tgtgtgtatc | tctgtgtgtg | tagctgtgtg  | tgtagctgtg  | tgtatatgcy | 34918667 |
| tgtgtgtgtg | tagctatgtg | tgtagctgtg  | tgtgcygtgta | tctctgtgtg | 34918717 |
| tagctgtgtg | tgtagctgtg | tgcataatgtg | tgtgtgtgta  | gctatgtgtg | 34918767 |
| tggctgtgtg | tgtgtgtgta | tctctgtttg  | tgtagctgtg  | tgtgtgcacy | 34918817 |
| tgaacatgtg | cttgtcactc | agactgtcac  | tgctctcact  | ggatctcctg | 34918867 |
| aggtttttgt | cgtttgaaat | gttgaatgta  | gcatgacacy  | gtggttatca | 34918917 |
| tctgttgtgc | tttttctct  | ttgaaatgat  | ctccttggtg  | tttgcataac | 34918967 |
| ttctgactat | agccctgatg | caaaaccaa   | gcatatggat  | gctgttctga | 34919017 |
| taaaaacaaa | attacacttg | acaagaatgt  | gagaattctt  | gagctttgtg | 34919067 |
| tataatttta | tatgccaggg | gctacagttt  | tgggtttttt  | ttttcctca  | 34919117 |
| tctaaaaata | cctctacaaa | atthaggaac  | aagtcagttg  | taatacatta | 34919167 |
| catatttaaa | gatacacata | agcaaaactg  | gtggcggata  | tgcacacaca | 34919217 |
| caatcctaaa | atatataata | cacatgtatt  | tatgtgcttt  | tactccatat | 34919267 |
| gtttttaaca | ccgatattta | tagagacatg  | gctagacata  | agggcagcca | 34919317 |
| atgggatcca | tctgtagaga | cagacaagca  | gattacctgt  | ttaagaatca | 34919367 |
| aactaagggt | ttctctctct | tagcaatatt  | gcctaccagg  | tcctctgaca | 34919417 |
| ctttatacag | ccattacccg | ctgtatggag  | ttaatatattg | catactataa | 34919467 |
| actaatctat | tttaggtttg | caaatgaact  | cttttcacaa  | attcatatca | 34919517 |
| tacaactatc | acaacctaat | tttagaattt  | gtgcaactct  | taaaaaagat | 34919567 |
| cccttgtacc | tgttaagctt | ggatgtgttt  | aatttcaaaa  | catttcactt | 34919617 |
| tcatcaagaa | gatgtctagc | cttggttgta  | cagttagaac  | ctggaccata | 34919667 |
| tttctgcagt | gctctacgtc | atctgacaac  | gtggcattgt  | aagagtcatg | 34919717 |
| gacaattcat | tgtgcacacc | tgtaatctca  | gcactcaaaa  | aggctgaggc | 34919767 |
| aggggggctt | gaaagttgga | aactaacctg  | ggcttcatgc  | caagaccccg | 34919817 |
| tctcaaacia | aaacagactt | agaatattct  | atltgaggtt  | tctgaaacga | 34919867 |
| gtcttagcaa | catatgtcca | taaatatgga  | gatgcaccct  | aggagccaac | 34919917 |
| ctcgtgcttt | aatcaacagg | ggtaccctga  | gagcctcttg  | attgagttca | 34919967 |
| taaggatatt | ggatgacggg | ttctgtgctg  | tgtgtctctc  | cccgtgctgc | 34920017 |
| agGATACCCA | GACCCTGAGG | TGGTCTGGTT  | CAAGGATGAC  | CAATCAATCA | 34920067 |
| GGGAGTCCCG | CCACTTCCAG | ATAGACTACG  | ACGAAGACGG  | CAACTGCTCG | 34920117 |
| CTCATCATCA | GCGACGTCTG | TGGGGATGAT  | GACGCCAAGT  | ACACCTGCAA | 34920167 |
| GGCTGTCAAC | AGCCTCGGAG | AAGCCACCTG  | CACTGCGGAG  | CTCATCGTGG | 34920217 |
| AGACCATGGA | GGAAGGGGAA | GGGGAGGAGG  | GGGGAGAGGA  | GGAGGAGGAG | 34920267 |
| GAGGAGGAGT | GAAGCCAAGC | CaAACAGAAG  | CAGTTCCTAA  | GTCATTTTAA | 34920317 |
| AAAGGACTAA | TTCCTTAAAG | CTCAAAAAAA  | AAAAAATAAA  | AAtcAAAAAa | 34920367 |
| accaaagcta | gaaaaggcac | ctgggtgtggt | agatgatcta  | gttaggctat | 34920417 |
| ttggaggctg | attcgtcagc | gacggcggct  | gatgcctggg  | agatatact  |          |
